# Supplementary material for: Small non-coding RNA Interactome Capture reveals pervasive, carbon source-dependent tRNA engagement of yeast glycolytic enzymes
Source: bioRxiv preprint, doi:10.1101/2022.07.14.500110, version 1 (2022-07-14)
Supplement: Table 2. CLIP2C_target genes [file 500110_file04.xlsx]

## Sheet: Sheet1
ID	name	biotype	region_type	logFC	PValue	qval	sig
tE(UUC)P	tE(UUC)P	tRNA	exon	-5.591	0.0921056	1	FALSE
YGR191W	HIP1	protein_coding	3UTR	-12.3292	1.65677e-50	2.78817e-46	TRUE
YJL137C	GLG2	protein_coding	5UTR	-3.84074	2.75558e-45	4.44054e-41	TRUE
YJL136W-A	YJL136W-A	protein_coding	5UTR	-3.49626	3.10188e-38	2.06583e-34	TRUE
tL(CAA)L	tL(CAA)L	tRNA	exon	-5.59076	0.0856403	1	FALSE
tT(UGU)Q1_cluster	tT(UGU)Q1_cluster	tRNA	exon	-4.61978	0.18127	0.522336	FALSE
YJL159W	HSP150	protein_coding	3UTR	-4.32786	3.70388e-37	1.54172e-33	TRUE
tS(UGA)Q2_cluster	tS(UGA)Q2_cluster	tRNA	exon	-4.61977	0.18127	0.5092	FALSE
YFL045C	SEC53	protein_coding	3UTR	-4.05058	9.66022e-33	2.81873e-29	TRUE
YML056C	IMD4	protein_coding	3UTR	-3.89348	4.10586e-31	9.69841e-28	TRUE
YFL039C	ACT1	protein_coding	5UTR	-3.18557	3.72785e-29	6.89643e-26	TRUE
YLR185W	RPL37A	protein_coding	3UTR	-3.70008	8.63173e-29	1.56782e-25	TRUE
YDR524C-B	YDR524C-B	protein_coding	3UTR	-3.20218	1.20878e-27	2.00861e-24	TRUE
YFL038C	YPT1	protein_coding	3UTR	-3.04915	1.26671e-27	2.00861e-24	TRUE
YGR235C	YGR235C	protein_coding	3UTR	-4.07736	3.70261e-27	5.52069e-24	TRUE
YMR142C	RPL13B	protein_coding	3UTR	-3.26611	5.02593e-26	7.15922e-23	TRUE
YNL300W	TOS6	protein_coding	3UTR	-3.77553	7.07225e-26	1.17467e-22	TRUE
YDR153C	ENT5	protein_coding	5UTR	-3.40617	7.16871e-26	9.65525e-23	TRUE
YBR031W	RPL4A	protein_coding	3UTR	-3.06165	4.48905e-25	5.66597e-22	TRUE
YGR192C	TDH3	protein_coding	3UTR	-2.74105	8.70708e-25	1.19779e-21	TRUE
YKL081W	TEF4	protein_coding	3UTR	-3.41454	1.27263e-24	1.474e-21	TRUE
YLR285W	NNT1	protein_coding	3UTR	-3.31128	2.42861e-24	2.67627e-21	TRUE
YGR192C	TDH3	protein_coding	exon	-2.59513	4.70412e-24	5.16298e-21	TRUE
YHL015W	RPS20	protein_coding	exon	-2.5705	4.83052e-24	5.2447e-21	TRUE
YDR524C	AGE1	protein_coding	5UTR	-3.50774	7.57188e-24	7.6487e-21	TRUE
YFR031C-A	RPL2A	protein_coding	3UTR	-3.9794	1.25738e-23	1.23568e-20	TRUE
YOR097C	YOR097C	protein_coding	3UTR	-3.34887	1.3871e-23	1.24461e-20	TRUE
YDR154C	YDR154C	protein_coding	3UTR	-2.69223	2.5061e-23	2.48089e-20	TRUE
YBR009C	HHF1	protein_coding	3UTR	-3.18616	2.67083e-23	2.59312e-20	TRUE
YEL017C-A	PMP2	protein_coding	3UTR	-3.05696	4.35586e-23	3.95586e-20	TRUE
YDR077W	SED1	protein_coding	3UTR	-4.65724	4.55582e-23	7.58195e-20	TRUE
YNL030W	HHF2	protein_coding	3UTR	-4.36713	4.4583e-22	3.57304e-19	TRUE
YPR051W	MAK3	protein_coding	3UTR	-3.33252	1.0094e-21	1.03776e-18	TRUE
tM(CAU)Q1_cluster	tM(CAU)Q1_cluster	tRNA	exon	-4.61974	0.185542	0.534615	FALSE
YLR441C	RPS1A	protein_coding	3UTR	-2.63789	4.03592e-21	2.89166e-18	TRUE
YPR050C	YPR050C	protein_coding	5UTR	-3.2919	1.13073e-20	9.6722e-18	TRUE
YMR122C	YMR122C	protein_coding	5UTR	-2.75787	2.10561e-19	1.2194e-16	TRUE
YOR167C	RPS28A	protein_coding	3UTR	-3.84021	2.12469e-19	1.47975e-16	TRUE
YHR063W-A	YHR063W-A	protein_coding	5UTR	-3.5504	2.16257e-19	1.61129e-16	TRUE
YDR155C	CPR1	protein_coding	3UTR	-2.28973	2.76943e-19	1.46173e-16	TRUE
YDR037W	KRS1	protein_coding	exon	-2.7369	1.89391e-18	9.90571e-16	TRUE
YKL117W	SBA1	protein_coding	3UTR	-3.10833	3.09409e-18	1.55325e-15	TRUE
YGL008C	PMA1	protein_coding	3UTR	-2.76898	4.25855e-18	2.09568e-15	TRUE
YCR030C	SYP1	protein_coding	5UTR	-2.55401	6.24426e-18	3.05735e-15	TRUE
YLR196W	PWP1	protein_coding	3UTR	-6.41027	8.29561e-18	2.44499e-14	TRUE
YMR307W	GAS1	protein_coding	3UTR	-4.95933	1.23295e-17	8.35202e-15	TRUE
YLR287C-A	RPS30A	protein_coding	3UTR	-3.43934	1.57988e-17	6.59698e-15	TRUE
YJR104C	SOD1	protein_coding	3UTR	-2.44138	2.07115e-17	8.78705e-15	TRUE
YOR020C	HSP10	protein_coding	3UTR	-3.50108	2.79178e-17	1.11411e-14	TRUE
snR17b	snR17b	snoRNA	exon	2.38879	4.56863e-17	1.81111e-14	TRUE
YKR057W	RPS21A	protein_coding	3UTR	-3.3989	5.14211e-17	2.00054e-14	TRUE
YHR191C	CTF8	protein_coding	3UTR	-3.44742	6.35254e-17	3.76334e-14	TRUE
YCR024C-A	PMP1	protein_coding	3UTR	-2.27572	6.77495e-17	2.34711e-14	TRUE
YPR043W	RPL43A	protein_coding	3UTR	-3.2683	7.4895e-17	2.7601e-14	TRUE
YHR141C	RPL42B	protein_coding	3UTR	-3.44096	9.05333e-17	3.3639e-14	TRUE
YGR036C	CAX4	protein_coding	5UTR	-2.35809	9.537e-17	3.54176e-14	TRUE
YGL103W	RPL28	protein_coding	3UTR	-2.6315	1.25502e-16	4.59145e-14	TRUE
YMR201C	RAD14	protein_coding	5UTR	-3.14598	2.16461e-16	1.16616e-13	TRUE
YHR064C	SSZ1	protein_coding	3UTR	-2.35766	3.24168e-16	9.99548e-14	TRUE
YNL301C	RPL18B	protein_coding	3UTR	-4.87386	3.60398e-16	2.55758e-13	TRUE
YGR037C	ACB1	protein_coding	3UTR	-2.30243	4.14194e-16	1.41426e-13	TRUE
YDL192W	ARF1	protein_coding	3UTR	-2.86287	4.49636e-16	1.47272e-13	TRUE
YGL201C	MCM6	protein_coding	3UTR	-3.64486	4.715e-16	1.55586e-13	TRUE
YDR077W	SED1	protein_coding	exon	-2.97935	5.0538e-16	1.93529e-13	TRUE
YGR209C	TRX2	protein_coding	3UTR	-3.76248	6.91006e-16	2.53921e-13	TRUE
YKL152C	GPM1	protein_coding	3UTR	-3.1811	7.37982e-16	2.10883e-13	TRUE
YHR190W	ERG9	protein_coding	exon	-2.77466	8.02219e-16	2.91278e-13	TRUE
YAL012W	CYS3	protein_coding	3UTR	-2.52358	8.76809e-16	2.62431e-13	TRUE
YIL052C	RPL34B	protein_coding	3UTR	-2.73171	8.96095e-16	2.77553e-13	TRUE
YGL202W	ARO8	protein_coding	exon	-3.35318	1.23699e-15	3.65236e-13	TRUE
YDL133C-A	RPL41B	protein_coding	3UTR	-3.03019	1.37312e-15	3.65598e-13	TRUE
YML123C	PHO84	protein_coding	3UTR	-4.89512	1.9419e-15	1.25093e-12	TRUE
YLR048W	RPS0B	protein_coding	3UTR	-2.8777	1.97159e-15	5.62741e-13	TRUE
YLL025W	PAU17	protein_coding	3UTR	-4.18989	2.03062e-15	5.95422e-13	TRUE
YGR240C	PFK1	protein_coding	3UTR	-3.26504	2.05152e-15	5.78202e-13	TRUE
YPR182W	SMX3	protein_coding	3UTR	-4.57794	2.06083e-15	3.20475e-12	TRUE
YGR086C	PIL1	protein_coding	3UTR	-3.39713	2.24192e-15	1.18323e-12	TRUE
YPL240C	HSP82	protein_coding	3UTR	-2.28112	3.73132e-15	9.17267e-13	TRUE
YPR173C	VPS4	protein_coding	3UTR	-4.7592	4.18966e-15	2.20995e-12	TRUE
YNL247W	YNL247W	protein_coding	3UTR	-4.43788	4.42961e-15	2.33816e-12	TRUE
YLR185W	RPL37A	protein_coding	exon	-2.01694	5.28063e-15	1.42003e-12	TRUE
YOR246C	ENV9	protein_coding	5UTR	-2.1766	5.46094e-15	1.42484e-12	TRUE
YJR009C	TDH2	protein_coding	exon	2.56795	5.68485e-15	1.63589e-12	TRUE
tM(CAU)Q2_cluster	tM(CAU)Q2_cluster	tRNA	exon	-4.6197	0.192989	0.698278	FALSE
YPR163C	TIF3	protein_coding	3UTR	-2.52051	5.89213e-15	1.47746e-12	TRUE
YML008C	ERG6	protein_coding	3UTR	-3.0113	6.3096e-15	2.495e-12	TRUE
YGL031C	RPL24A	protein_coding	3UTR	-3.28768	7.13903e-15	3.53625e-12	TRUE
YGR239C	PEX21	protein_coding	5UTR	-4.69396	7.39461e-15	3.64929e-12	TRUE
YGR084C	MRP13	protein_coding	5UTR	-2.61465	8.9185e-15	2.84464e-12	TRUE
YOR230W	WTM1	protein_coding	3UTR	-3.17355	1.03547e-14	3.23995e-12	TRUE
YPR044C	OPI11	protein_coding	exon	-2.50818	1.12228e-14	2.83439e-12	TRUE
YDR119W-A	COX26	protein_coding	3UTR	-3.61437	1.23229e-14	5.9069e-12	TRUE
YDL061C	RPS29B	protein_coding	3UTR	-5.07645	1.50363e-14	6.35109e-12	TRUE
YBL099W	ATP1	protein_coding	3UTR	-3.54732	1.66066e-14	5.98921e-12	TRUE
YLL047W	YLL047W	protein_coding	3UTR	-3.62139	1.93209e-14	5.21515e-12	TRUE
YPL091W	GLR1	protein_coding	3UTR	-3.71046	2.05886e-14	4.61099e-12	TRUE
YDR225W	HTA1	protein_coding	3UTR	-5.90771	2.64513e-14	1.11624e-11	TRUE
YDL014W	NOP1	protein_coding	3UTR	-3.91394	3.41869e-14	1.41129e-11	TRUE
YJL079C	PRY1	protein_coding	5UTR	-3.39571	3.97293e-14	2.72838e-11	TRUE
YDR447C	RPS17B	protein_coding	3UTR	-2.35481	4.29559e-14	9.28785e-12	TRUE
YER031C	YPT31	protein_coding	3UTR	-3.01242	4.40258e-14	1.13096e-11	TRUE
YPL241C	CIN2	protein_coding	5UTR	-2.46874	4.65621e-14	1.18856e-11	TRUE
YNL145W	MFA2	protein_coding	3UTR	-3.30325	7.37584e-14	2.35886e-11	TRUE
YKR093W	PTR2	protein_coding	3UTR	-3.30684	8.77214e-14	2.72838e-11	TRUE
YMR131C	RRB1	protein_coding	3UTR	-9.72445	1.03266e-13	3.87618e-11	TRUE
YJR009C	TDH2	protein_coding	5UTR	3.97585	1.15894e-13	2.29494e-11	TRUE
YPL160W	CDC60	protein_coding	3UTR	-3.42308	1.17525e-13	2.69704e-11	TRUE
YOR331C	YOR331C	protein_coding	5UTR	-2.54166	1.26298e-13	3.20884e-11	TRUE
YDR471W	RPL27B	protein_coding	3UTR	-3.67969	1.29482e-13	3.92088e-11	TRUE
YDL208W	NHP2	protein_coding	3UTR	-3.14682	1.6673e-13	3.17484e-11	TRUE
YMR251W-A	HOR7	protein_coding	exon	-2.27876	2.21484e-13	3.77101e-11	TRUE
YMR242C	RPL20A	protein_coding	3UTR	-4.41591	2.32909e-13	3.93566e-11	TRUE
YER154W	OXA1	protein_coding	exon	-3.33196	2.97117e-13	8.40993e-11	TRUE
YPR182W	SMX3	protein_coding	exon	-2.75399	3.12233e-13	1.05815e-10	TRUE
YPL061W	ALD6	protein_coding	3UTR	-3.22908	3.24318e-13	6.99714e-11	TRUE
YER043C	SAH1	protein_coding	3UTR	-2.82429	3.97429e-13	8.3267e-11	TRUE
YMR120C	ADE17	protein_coding	3UTR	-9.7666	4.33914e-13	3.46724e-10	TRUE
tG(GCC)P1	tG(GCC)P1	tRNA	exon	-4.61966	0.232908	1	FALSE
YDL126C	CDC48	protein_coding	3UTR	-2.80034	4.75058e-13	8.38475e-11	TRUE
YER072W	VTC1	protein_coding	exon	-4.16008	5.35976e-13	1.44618e-10	TRUE
YBR126C	TPS1	protein_coding	3UTR	-4.25094	7.13189e-13	3.12713e-10	TRUE
YER155C	BEM2	protein_coding	3UTR	-4.19146	7.33982e-13	2.50844e-10	TRUE
YBR084C-A	RPL19A	protein_coding	3UTR	-2.96577	8.88432e-13	1.78941e-10	TRUE
YML063W	RPS1B	protein_coding	exon	-1.76569	1.04323e-12	1.79582e-10	TRUE
YLL045C	RPL8B	protein_coding	3UTR	-2.35175	1.10597e-12	2.03851e-10	TRUE
YDR212W	TCP1	protein_coding	3UTR	-3.26902	1.25e-12	3.84818e-10	TRUE
YDL224C	WHI4	protein_coding	3UTR	-9.69192	1.32576e-12	7.375e-10	TRUE
YKL096C-B	YKL096C-B	protein_coding	5UTR	-3.65661	1.58395e-12	2.48157e-10	TRUE
YDR002W	YRB1	protein_coding	3UTR	-2.74721	1.71251e-12	2.65286e-10	TRUE
YPL061W	ALD6	protein_coding	exon	-2.161	2.07278e-12	3.64199e-10	TRUE
YBL030C	PET9	protein_coding	3UTR	-5.72989	2.19329e-12	8.87117e-10	TRUE
YBR245C	ISW1	protein_coding	5UTR	-4.88477	2.32668e-12	7.10617e-10	TRUE
YHR174W	ENO2	protein_coding	3UTR	-2.75336	2.38639e-12	4.13505e-10	TRUE
YNL079C	TPM1	protein_coding	3UTR	-2.81091	2.55064e-12	3.93218e-10	TRUE
YDR428C	BNA7	protein_coding	5UTR	-4.08793	2.64243e-12	7.9135e-10	TRUE
YBR162W-A	YSY6	protein_coding	3UTR	-3.23746	2.85636e-12	8.04155e-10	TRUE
YML008C	ERG6	protein_coding	exon	-2.09004	3.23967e-12	4.83309e-10	TRUE
YDL083C	RPS16B	protein_coding	3UTR	-3.8397	3.24395e-12	8.80798e-10	TRUE
YLR197W	NOP56	protein_coding	exon	-1.84166	3.32115e-12	5.14533e-10	TRUE
RDN37-2	RDN37-2	rRNA	exon	-2.10194	3.52868e-12	9.44682e-10	TRUE
YNL080C	EOS1	protein_coding	5UTR	-3.09581	3.65312e-12	6.98115e-10	TRUE
YCR031C	RPS14A	protein_coding	3UTR	-1.8968	3.73525e-12	5.70178e-10	TRUE
YMR189W	GCV2	protein_coding	exon	-3.85103	4.49674e-12	1.2758e-09	TRUE
YFR050C	PRE4	protein_coding	3UTR	-3.45952	4.60258e-12	1.73217e-09	TRUE
YDR038C	ENA5	protein_coding	5UTR	-5.61958	4.6331e-12	1.21666e-09	TRUE
YPR108W	RPN7	protein_coding	3UTR	-3.29804	4.78378e-12	1.25111e-09	TRUE
YIL142W	CCT2	protein_coding	exon	-1.91833	4.83161e-12	6.96496e-10	TRUE
YNL071W	LAT1	protein_coding	3UTR	-4.39038	4.87737e-12	1.37454e-09	TRUE
YPR035W	GLN1	protein_coding	3UTR	-4.38336	5.48484e-12	1.57432e-09	TRUE
YMR141C	YMR141C	protein_coding	exon	-2.69234	6.04626e-12	8.62309e-10	TRUE
YDR345C	HXT3	protein_coding	3UTR	-2.76202	7.26582e-12	9.98375e-10	TRUE
YJR045C	SSC1	protein_coding	3UTR	-2.83099	7.41047e-12	1.22414e-09	TRUE
YDL126C	CDC48	protein_coding	exon	-2.48944	8.46886e-12	1.13121e-09	TRUE
YDL082W	RPL13A	protein_coding	3UTR	-3.79574	8.86678e-12	2.17106e-09	TRUE
YER030W	CHZ1	protein_coding	exon	-2.0371	9.21704e-12	1.26109e-09	TRUE
YNL280C	ERG24	protein_coding	3UTR	-3.35896	9.77438e-12	2.03462e-09	TRUE
YIL034C	CAP2	protein_coding	5UTR	-3.39995	1.0289e-11	2.7441e-09	TRUE
YDR497C	ITR1	protein_coding	3UTR	-2.58254	1.11148e-11	1.73217e-09	TRUE
YER072W	VTC1	protein_coding	3UTR	-4.00779	1.14992e-11	2.8413e-09	TRUE
YGL200C	EMP24	protein_coding	3UTR	-3.43168	1.27397e-11	1.95414e-09	TRUE
YKL013C	ARC19	protein_coding	3UTR	-4.28379	1.37898e-11	2.72425e-09	TRUE
YIL157C	COA1	protein_coding	3UTR	-4.39785	1.47521e-11	6.42368e-09	TRUE
YHR174W	ENO2	protein_coding	exon	1.62067	1.47613e-11	2.14577e-09	TRUE
YFL026W	STE2	protein_coding	3UTR	-5.56765	1.77265e-11	4.53699e-09	TRUE
YEL040W	UTR2	protein_coding	3UTR	-5.581	1.97944e-11	5.01819e-09	TRUE
YNL098C	RAS2	protein_coding	3UTR	-2.41124	2.07408e-11	2.63276e-09	TRUE
RDN5-1	RDN5-1	rRNA	exon	3.70741	2.10204e-11	1.32989e-08	TRUE
YBR092C	PHO3	protein_coding	exon	-2.13162	2.31034e-11	2.90154e-09	TRUE
YJL026W	RNR2	protein_coding	3UTR	-3.44102	2.38075e-11	5.52018e-09	TRUE
YAL012W	CYS3	protein_coding	exon	-1.91253	2.93795e-11	3.61006e-09	TRUE
YMR183C	SSO2	protein_coding	3UTR	-3.52625	3.14001e-11	1.23638e-08	TRUE
YKL180W	RPL17A	protein_coding	3UTR	-3.07669	3.36399e-11	5.21954e-09	TRUE
YHR005C	GPA1	protein_coding	5UTR	-2.58188	3.54857e-11	5.50441e-09	TRUE
YNL071W	LAT1	protein_coding	exon	-2.859	3.61467e-11	5.08246e-09	TRUE
YBL046W	PSY4	protein_coding	3UTR	-9.36482	3.62968e-11	8.62911e-09	TRUE
YMR143W	RPS16A	protein_coding	3UTR	-2.84149	3.70312e-11	6.62334e-09	TRUE
YML024W	RPS17A	protein_coding	exon	-2.4978	4.06666e-11	4.391e-09	TRUE
YGR034W	RPL26B	protein_coding	exon	-1.67618	4.08035e-11	4.89904e-09	TRUE
YML078W	CPR3	protein_coding	3UTR	-3.44121	4.22844e-11	1.00215e-08	TRUE
YOR332W	VMA4	protein_coding	exon	-2.03309	4.72642e-11	5.55582e-09	TRUE
YGL037C	PNC1	protein_coding	3UTR	-3.69381	5.09188e-11	1.08053e-08	TRUE
YDR174W	HMO1	protein_coding	3UTR	-3.25234	5.73335e-11	4.1924e-08	TRUE
YMR182W-A	YMR182W-A	protein_coding	3UTR	-4.01558	6.1126e-11	4.47161e-08	TRUE
YPR043W	RPL43A	protein_coding	exon	-1.78289	6.15642e-11	6.98885e-09	TRUE
YBR230C	OM14	protein_coding	3UTR	-3.4375	6.6462e-11	2.38991e-08	TRUE
YHR019C	DED81	protein_coding	3UTR	-2.88045	6.64726e-11	2.29543e-08	TRUE
YML024W	RPS17A	protein_coding	3UTR	-2.70038	6.7896e-11	7.61249e-09	TRUE
YGR168C	YGR168C	protein_coding	3UTR	-5.61498	6.79e-11	3.75431e-08	TRUE
YBR067C	TIP1	protein_coding	exon	2.46878	7.43163e-11	8.29509e-09	TRUE
YPL271W	ATP15	protein_coding	3UTR	-3.90481	8.10648e-11	1.69796e-08	TRUE
YLR325C	RPL38	protein_coding	3UTR	-4.16886	8.57438e-11	1.47384e-08	TRUE
YNL015W	PBI2	protein_coding	3UTR	-3.96497	8.68397e-11	2.18499e-08	TRUE
YDR086C	SSS1	protein_coding	3UTR	-4.23727	8.85997e-11	1.97336e-08	TRUE
YOR276W	CAF20	protein_coding	3UTR	-3.61969	1.00159e-10	1.31006e-08	TRUE
snR17a	snR17a	snoRNA	exon	1.65759	1.03004e-10	1.12828e-08	TRUE
YJR063W	RPA12	protein_coding	3UTR	-2.66709	1.07788e-10	2.32854e-08	TRUE
YKL164C	PIR1	protein_coding	3UTR	-1.82572	1.12981e-10	1.27058e-08	TRUE
YDL192W	ARF1	protein_coding	exon	-1.75394	1.15535e-10	1.25182e-08	TRUE
YDL225W	SHS1	protein_coding	exon	-3.52625	1.33052e-10	2.82889e-08	TRUE
YPL050C	MNN9	protein_coding	5UTR	-2.36195	1.41454e-10	2.94465e-08	TRUE
YIL007C	NAS2	protein_coding	3UTR	-4.65627	1.50192e-10	3.14926e-08	TRUE
YOL120C	RPL18A	protein_coding	3UTR	-2.60745	1.5325e-10	1.93558e-08	TRUE
YEL024W	RIP1	protein_coding	3UTR	-5.45251	1.55122e-10	3.24307e-08	TRUE
YER009W	NTF2	protein_coding	3UTR	-3.45686	1.56068e-10	2.94465e-08	TRUE
YPL197C	YPL197C	protein_coding	exon	-2.07317	1.71234e-10	1.79497e-08	TRUE
YGL076C	RPL7A	protein_coding	exon	2.15138	1.86387e-10	2.26395e-08	TRUE
YDL137W	ARF2	protein_coding	3UTR	-3.34641	1.95142e-10	3.92812e-08	TRUE
YFL039C	ACT1	protein_coding	3UTR	-2.08139	2.02336e-10	2.41812e-08	TRUE
YNL016W	PUB1	protein_coding	3UTR	-4.64679	2.3177e-10	8.79674e-08	TRUE
YDL130W	RPP1B	protein_coding	3UTR	-3.1698	2.98882e-10	4.53962e-08	TRUE
YLR061W	RPL22A	protein_coding	exon	-1.55028	2.98979e-10	2.69615e-08	TRUE
YHL015W	RPS20	protein_coding	3UTR	-3.38026	3.19031e-10	4.00629e-08	TRUE
YCL043C	PDI1	protein_coding	exon	2.111	3.3692e-10	2.98726e-08	TRUE
YDL081C	RPP1A	protein_coding	5UTR	-1.59667	3.38199e-10	3.33164e-08	TRUE
YKL182W	FAS1	protein_coding	exon	-1.84939	3.71319e-10	3.99675e-08	TRUE
YPL225W	YPL225W	protein_coding	exon	-2.71884	4.00793e-10	3.81226e-08	TRUE
YKL156C-A	YKL156C-A	protein_coding	5UTR	-2.28076	4.18793e-10	3.96825e-08	TRUE
YMR119W-A	YMR119W-A	protein_coding	exon	-5.44499	4.2976e-10	1.39105e-07	TRUE
YBL072C	RPS8A	protein_coding	exon	5.08218	4.81812e-10	8.2438e-08	TRUE
YOL139C	CDC33	protein_coding	3UTR	-3.75438	4.86761e-10	5.46986e-08	TRUE
YBR118W	TEF2	protein_coding	exon	9.42154	5.01753e-10	8.79353e-08	TRUE
YPL131W	RPL5	protein_coding	3UTR	-2.14733	5.02675e-10	4.60571e-08	TRUE
YKL101W	HSL1	protein_coding	exon	-3.28898	5.02919e-10	9.27907e-08	TRUE
YPL198W	RPL7B	protein_coding	3UTR	-2.37712	5.47249e-10	6.07081e-08	TRUE
YMR309C	NIP1	protein_coding	3UTR	-4.09355	6.36379e-10	1.16628e-07	TRUE
YCL001W	RER1	protein_coding	exon	-2.1456	6.36967e-10	1.06189e-07	TRUE
YIR013C	GAT4	protein_coding	3UTR	-4.61621	6.70804e-10	3.58525e-07	TRUE
YPL170W	DAP1	protein_coding	exon	-2.38951	6.85596e-10	1.26447e-07	TRUE
YLR388W	RPS29A	protein_coding	3UTR	-2.56714	6.90742e-10	8.15029e-08	TRUE
YIL094C	LYS12	protein_coding	3UTR	-3.11634	7.21333e-10	1.17445e-07	TRUE
YER074W	RPS24A	protein_coding	3UTR	-2.67624	7.5139e-10	6.73994e-08	TRUE
YAL044W-A	BOL1	protein_coding	exon	-2.57564	8.38285e-10	1.12869e-07	TRUE
YBR162W-A	YSY6	protein_coding	exon	-2.67958	8.67567e-10	1.43797e-07	TRUE
YLR448W	RPL6B	protein_coding	3UTR	-2.35675	1.03512e-09	8.844e-08	TRUE
YDL159W	STE7	protein_coding	3UTR	-3.18568	1.11805e-09	1.13106e-07	TRUE
YNL099C	OCA1	protein_coding	5UTR	-5.31134	1.26607e-09	2.77478e-07	TRUE
YKR094C	RPL40B	protein_coding	3UTR	-2.2235	1.27912e-09	1.30816e-07	TRUE
YOL039W	RPP2A	protein_coding	3UTR	-1.62406	1.33038e-09	1.13885e-07	TRUE
YCR082W	AHC2	protein_coding	3UTR	-3.51766	1.34874e-09	2.12193e-07	TRUE
YGR148C	RPL24B	protein_coding	3UTR	-3.29415	1.41915e-09	1.41432e-07	TRUE
YKR042W	UTH1	protein_coding	3UTR	-2.21363	1.46161e-09	1.23197e-07	TRUE
YFR053C	HXK1	protein_coding	5UTR	-5.46866	1.55655e-09	1.99508e-07	TRUE
YLR344W	RPL26A	protein_coding	3UTR	-1.66608	1.60829e-09	1.35014e-07	TRUE
YDR048C	YDR048C	protein_coding	5UTR	-3.97054	1.64191e-09	2.45714e-07	TRUE
YKL006W	RPL14A	protein_coding	3UTR	-9.01347	1.77499e-09	2.69871e-07	TRUE
YOR121C	YOR121C	protein_coding	exon	-4.00415	1.81324e-09	2.88746e-07	TRUE
YGR284C	ERV29	protein_coding	5UTR	-3.70808	1.82048e-09	2.89679e-07	TRUE
YHR143W	DSE2	protein_coding	exon	-1.89564	1.82232e-09	1.79348e-07	TRUE
YIL094C	LYS12	protein_coding	exon	-2.66493	1.83198e-09	1.76259e-07	TRUE
YOL086C	ADH1	protein_coding	exon	1.4611	1.83569e-09	1.57216e-07	TRUE
YOR027W	STI1	protein_coding	3UTR	-5.30961	1.84432e-09	3.762e-07	TRUE
YLR110C	CCW12	protein_coding	3UTR	-3.6665	1.84641e-09	1.78632e-07	TRUE
YPL160W	CDC60	protein_coding	exon	-2.73555	1.89335e-09	2.36366e-07	TRUE
YOL059W	GPD2	protein_coding	3UTR	-2.89777	1.91166e-09	5.13239e-07	TRUE
YDR429C	TIF35	protein_coding	3UTR	-2.50435	1.93726e-09	2.03181e-07	TRUE
YML052W	SUR7	protein_coding	3UTR	-3.83058	1.96884e-09	8.73077e-07	TRUE
YPL049C	DIG1	protein_coding	3UTR	-1.70858	1.97128e-09	1.63422e-07	TRUE
YBL072C	RPS8A	protein_coding	3UTR	-1.9983	2.20272e-09	1.77664e-07	TRUE
YAL003W	EFB1	protein_coding	3UTR	-3.13613	2.46145e-09	2.3262e-07	TRUE
YGR135W	PRE9	protein_coding	exon	-1.92436	2.51979e-09	1.99508e-07	TRUE
YEL038W	UTR4	protein_coding	3UTR	-4.53393	2.58107e-09	6.55425e-07	TRUE
YAL045C	YAL045C	protein_coding	5UTR	-2.94126	2.71283e-09	3.82273e-07	TRUE
YNL135C	FPR1	protein_coding	3UTR	-2.52985	2.77469e-09	2.52931e-07	TRUE
YBR109C	CMD1	protein_coding	3UTR	-2.39422	2.862e-09	2.24419e-07	TRUE
YDL081C	RPP1A	protein_coding	exon	-1.44973	2.88594e-09	2.33123e-07	TRUE
YGL245W	GUS1	protein_coding	exon	-3.04591	3.12538e-09	4.69631e-07	TRUE
YGR105W	VMA21	protein_coding	exon	-2.2795	3.16762e-09	2.8579e-07	TRUE
YGR253C	PUP2	protein_coding	3UTR	-3.05761	3.18856e-09	4.40601e-07	TRUE
YDR461C-A	YDR461C-A	protein_coding	3UTR	-9.14437	3.19992e-09	1.4805e-06	TRUE
YNL070W	TOM7	protein_coding	3UTR	-3.41561	3.25489e-09	2.97181e-07	TRUE
YBR181C	RPS6B	protein_coding	exon	9.36608	3.35127e-09	9.24633e-07	TRUE
YCR076C	FUB1	protein_coding	3UTR	-4.06896	3.48363e-09	9.68246e-07	TRUE
YPL158C	AIM44	protein_coding	exon	-1.74691	3.52737e-09	3.14673e-07	TRUE
YLR433C	CNA1	protein_coding	3UTR	-3.27579	3.57801e-09	5.29333e-07	TRUE
YKL182W	FAS1	protein_coding	3UTR	-3.10725	3.62056e-09	3.54111e-07	TRUE
YMR116C	ASC1	protein_coding	3UTR	-2.40454	3.68492e-09	2.79726e-07	TRUE
YMR260C	TIF11	protein_coding	exon	-1.52815	3.81759e-09	2.98171e-07	TRUE
YER053C	PIC2	protein_coding	exon	-9.02203	3.87338e-09	5.78946e-07	TRUE
YBR229C	ROT2	protein_coding	5UTR	-4.01502	4.22638e-09	7.05092e-07	TRUE
YAL023C	PMT2	protein_coding	3UTR	-2.48381	4.64547e-09	6.18065e-07	TRUE
YPL010W	RET3	protein_coding	3UTR	-2.71045	4.6924e-09	6.72462e-07	TRUE
YDL130W	RPP1B	protein_coding	exon	1.7192	4.86763e-09	3.55602e-07	TRUE
YPR188C	MLC2	protein_coding	3UTR	-3.4417	4.91822e-09	6.67068e-07	TRUE
YLR406C	RPL31B	protein_coding	3UTR	-2.59185	4.92183e-09	4.6692e-07	TRUE
YJL026W	RNR2	protein_coding	exon	-2.44596	5.25858e-09	6.80527e-07	TRUE
YPR154W	PIN3	protein_coding	exon	-1.5239	5.2792e-09	3.84672e-07	TRUE
YDR427W	RPN9	protein_coding	3UTR	-4.44823	5.29518e-09	9.58604e-07	TRUE
YLR034C	SMF3	protein_coding	3UTR	-4.43457	5.37508e-09	1.19539e-06	TRUE
YGL245W	GUS1	protein_coding	3UTR	-3.46139	5.39075e-09	7.71038e-07	TRUE
YLL021W	SPA2	protein_coding	exon	-2.33744	5.60326e-09	6.08671e-07	TRUE
YER120W	SCS2	protein_coding	exon	-2.34736	5.72813e-09	4.83818e-07	TRUE
YNL055C	POR1	protein_coding	3UTR	-2.49777	5.78097e-09	4.83818e-07	TRUE
YDL084W	SUB2	protein_coding	exon	-1.9591	5.8178e-09	4.23232e-07	TRUE
YDR085C	AFR1	protein_coding	5UTR	-9.08375	5.94674e-09	1.31664e-06	TRUE
YIL041W	GVP36	protein_coding	3UTR	-2.57539	6.14699e-09	8.64675e-07	TRUE
YGL033W	HOP2	protein_coding	3UTR	-3.04998	6.40527e-09	1.16821e-06	TRUE
YNL031C	HHT2	protein_coding	3UTR	-2.59405	6.56092e-09	5.46791e-07	TRUE
YFL022C	FRS2	protein_coding	3UTR	-2.43289	6.75041e-09	8.5994e-07	TRUE
YCL057W	PRD1	protein_coding	exon	9.21916	7.20511e-09	9.96654e-07	TRUE
YOR369C	RPS12	protein_coding	3UTR	-3.17408	7.3298e-09	5.15298e-07	TRUE
YML052W	SUR7	protein_coding	exon	-2.68853	7.38464e-09	1.00455e-06	TRUE
YMR013W-A	YMR013W-A	protein_coding	5UTR	1.68098	7.66626e-09	5.99291e-07	TRUE
YDR174W	HMO1	protein_coding	exon	-1.58197	7.66693e-09	5.24563e-07	TRUE
YCL058C	FYV5	protein_coding	exon	2.27973	7.83224e-09	8.35214e-07	TRUE
YGR254W	ENO1	protein_coding	exon	2.26051	8.11669e-09	5.7153e-07	TRUE
YMR073C	IRC21	protein_coding	5UTR	-9.08377	8.14165e-09	2.96741e-06	TRUE
YHR203C	RPS4B	protein_coding	exon	1.97327	8.4118e-09	5.89433e-07	TRUE
YOR260W	GCD1	protein_coding	3UTR	-1.73904	8.44811e-09	5.86895e-07	TRUE
YPL198W	RPL7B	protein_coding	exon	-1.70177	8.47754e-09	5.93627e-07	TRUE
YKL152C	GPM1	protein_coding	exon	1.43725	8.59232e-09	5.40273e-07	TRUE
YLR344W	RPL26A	protein_coding	exon	-1.49216	8.69307e-09	6.69354e-07	TRUE
YLR180W	SAM1	protein_coding	3UTR	-2.89256	9.13028e-09	1.22225e-06	TRUE
YGL135W	RPL1B	protein_coding	3UTR	-2.50389	9.13458e-09	6.11751e-07	TRUE
YKR065C	PAM17	protein_coding	3UTR	-3.30283	9.23595e-09	1.86982e-06	TRUE
YPL145C	KES1	protein_coding	3UTR	-3.95893	9.30717e-09	2.31552e-06	TRUE
YOL097C	WRS1	protein_coding	3UTR	-3.07121	9.3391e-09	1.14471e-06	TRUE
YGL076C	RPL7A	protein_coding	3UTR	-3.88645	1.01232e-08	1.32189e-06	TRUE
YOL021C	DIS3	protein_coding	3UTR	-3.92787	1.01443e-08	1.34406e-06	TRUE
YKR064W	OAF3	protein_coding	exon	-3.69317	1.05371e-08	2.98465e-06	TRUE
YOL077C	BRX1	protein_coding	3UTR	-4.32314	1.088e-08	1.43044e-06	TRUE
YPL004C	LSP1	protein_coding	3UTR	-3.05016	1.13838e-08	1.15852e-06	TRUE
YFL018C	LPD1	protein_coding	3UTR	-5.15154	1.15849e-08	2.55437e-06	TRUE
YPL271W	ATP15	protein_coding	exon	-1.73538	1.19161e-08	7.9128e-07	TRUE
YDR212W	TCP1	protein_coding	exon	-1.96728	1.24982e-08	8.24961e-07	TRUE
YGL030W	RPL30	protein_coding	exon	-1.58965	1.29858e-08	7.82002e-07	TRUE
YMR038C	CCS1	protein_coding	3UTR	-2.10186	1.3887e-08	1.34879e-06	TRUE
YML011C	RAD33	protein_coding	3UTR	-3.08252	1.45024e-08	1.83036e-06	TRUE
YDL095W	PMT1	protein_coding	3UTR	-2.94161	1.49465e-08	1.87374e-06	TRUE
YGL169W	SUA5	protein_coding	3UTR	-8.87962	1.51095e-08	2.02977e-06	TRUE
YLR432W	IMD3	protein_coding	exon	-3.35373	1.51585e-08	1.89445e-06	TRUE
YDR461W	MFA1	protein_coding	5UTR	-1.52046	1.52129e-08	1.09652e-06	TRUE
YDR344C	YDR344C	protein_coding	5UTR	-3.52358	1.54162e-08	1.26765e-06	TRUE
YML074C	FPR3	protein_coding	3UTR	-4.25299	1.59626e-08	1.82522e-06	TRUE
YNL287W	SEC21	protein_coding	3UTR	-1.62871	1.64944e-08	1.17612e-06	TRUE
YOR293W	RPS10A	protein_coding	exon	2.28373	1.69499e-08	1.92988e-06	TRUE
YDL094C	YDL094C	protein_coding	3UTR	-2.74612	1.75215e-08	1.69808e-06	TRUE
YKL004W	AUR1	protein_coding	3UTR	-3.59822	1.77649e-08	2.33838e-06	TRUE
YCR082W	AHC2	protein_coding	exon	-3.01236	1.78564e-08	1.44663e-06	TRUE
YJR125C	ENT3	protein_coding	exon	-5.15124	1.79874e-08	6.92883e-06	TRUE
YDR483W	KRE2	protein_coding	3UTR	-5.03317	1.81225e-08	2.22068e-06	TRUE
YKL116C	PRR1	protein_coding	5UTR	-2.32633	1.81655e-08	2.22466e-06	TRUE
YGL038C	OCH1	protein_coding	3UTR	-3.91674	1.83954e-08	3.53692e-06	TRUE
YER119C	AVT6	protein_coding	3UTR	-3.13866	1.85107e-08	4.21444e-06	TRUE
YMR307W	GAS1	protein_coding	exon	-2.07594	1.92995e-08	1.20343e-06	TRUE
YLR216C	CPR6	protein_coding	3UTR	-2.51293	2.03825e-08	1.51063e-06	TRUE
YIL124W	AYR1	protein_coding	3UTR	-3.20156	2.04405e-08	2.47444e-06	TRUE
YKL018C-A	YKL018C-A	protein_coding	3UTR	-2.78022	2.05373e-08	2.65738e-06	TRUE
YDR353W	TRR1	protein_coding	exon	-2.15699	2.0936e-08	1.67873e-06	TRUE
YLR106C	MDN1	protein_coding	3UTR	-2.80732	2.24707e-08	2.10896e-06	TRUE
tD(GUC)G2	tD(GUC)G2	tRNA	exon	-4.61966	0.23276	1	FALSE
YGR155W	CYS4	protein_coding	3UTR	-1.7269	2.30057e-08	1.83031e-06	TRUE
YPR040W	TIP41	protein_coding	exon	-2.60392	2.43958e-08	3.67758e-06	TRUE
YGR185C	TYS1	protein_coding	3UTR	-1.73653	2.44014e-08	1.49331e-06	TRUE
YLR028C	ADE16	protein_coding	3UTR	-2.66528	2.49116e-08	2.77898e-06	TRUE
YER119C-A	YER119C-A	protein_coding	5UTR	-2.74113	2.53574e-08	2.74984e-06	TRUE
YJR143C	PMT4	protein_coding	3UTR	-3.3349	2.54465e-08	3.02275e-06	TRUE
YOL122C	SMF1	protein_coding	5UTR	-2.24699	2.72869e-08	1.92403e-06	TRUE
YBL016W	FUS3	protein_coding	3UTR	-3.86067	2.95116e-08	3.91487e-06	TRUE
YOR309C	YOR309C	protein_coding	3UTR	-2.62079	2.99189e-08	2.29894e-06	TRUE
YCL001W	RER1	protein_coding	3UTR	-1.97658	3.05316e-08	3.31108e-06	TRUE
YLR197W	NOP56	protein_coding	3UTR	-8.80653	3.05419e-08	3.55126e-06	TRUE
YPL144W	POC4	protein_coding	3UTR	1.42251	3.12319e-08	1.87938e-06	TRUE
YDL028C	MPS1	protein_coding	3UTR	-3.77916	3.17539e-08	3.35346e-06	TRUE
YBL031W	SHE1	protein_coding	exon	-5.14265	3.2068e-08	9.9689e-06	TRUE
YOL086C	ADH1	protein_coding	3UTR	-2.6491	3.32542e-08	1.91269e-06	TRUE
YOR261C	RPN8	protein_coding	exon	-1.6634	3.35989e-08	1.98023e-06	TRUE
YIR011C	STS1	protein_coding	5UTR	-2.27235	3.39092e-08	3.55126e-06	TRUE
YJL158C	CIS3	protein_coding	3UTR	-2.00592	3.60184e-08	2.10667e-06	TRUE
YGR175C	ERG1	protein_coding	3UTR	-2.55897	3.60622e-08	3.18702e-06	TRUE
YLR421C	RPN13	protein_coding	exon	-1.71898	3.74381e-08	2.16568e-06	TRUE
YGR192C	TDH3	protein_coding	5UTR	-1.47464	3.83499e-08	2.30367e-06	TRUE
YKR065C	PAM17	protein_coding	5UTR	-3.8286	3.87075e-08	6.8722e-06	TRUE
YOR006C	TSR3	protein_coding	5UTR	-8.72764	3.90634e-08	4.03175e-06	TRUE
YLR333C	RPS25B	protein_coding	exon	-1.62843	3.96745e-08	2.29894e-06	TRUE
YDL124W	YDL124W	protein_coding	exon	-2.37524	4.00279e-08	2.73584e-06	TRUE
YJR063W	RPA12	protein_coding	exon	-2.35684	4.08801e-08	4.87803e-06	TRUE
YLR150W	STM1	protein_coding	3UTR	-1.72081	4.09075e-08	2.42642e-06	TRUE
YNL096C	RPS7B	protein_coding	3UTR	-2.67633	4.18755e-08	2.77656e-06	TRUE
YML058W	SML1	protein_coding	3UTR	-3.66363	4.39847e-08	5.09059e-05	TRUE
YFR053C	HXK1	protein_coding	exon	-3.62996	4.59627e-08	3.01033e-06	TRUE
YJR044C	VPS55	protein_coding	5UTR	-3.63935	4.63013e-08	1.31823e-05	TRUE
YGR282C	BGL2	protein_coding	3UTR	-3.53395	4.67397e-08	5.19162e-06	TRUE
YOR232W	MGE1	protein_coding	3UTR	-8.81165	4.79569e-08	8.01103e-06	TRUE
YHR188C	GPI16	protein_coding	3UTR	-3.82058	4.86069e-08	5.34621e-06	TRUE
YNL255C	GIS2	protein_coding	3UTR	-1.9203	4.92352e-08	2.75029e-06	TRUE
YDR033W	MRH1	protein_coding	3UTR	-4.97591	5.09312e-08	5.57593e-06	TRUE
YBR084C-A	RPL19A	protein_coding	exon	1.60096	5.18055e-08	3.21619e-06	TRUE
YLR061W	RPL22A	protein_coding	3UTR	-1.5218	5.20166e-08	2.64588e-06	TRUE
YFR049W	YMR31	protein_coding	exon	-3.59243	5.39959e-08	1.65303e-05	TRUE
YGL026C	TRP5	protein_coding	3UTR	-2.4968	5.53884e-08	5.63035e-06	TRUE
YGL011C	SCL1	protein_coding	3UTR	-2.65817	6.08346e-08	5.97668e-06	TRUE
YER177W	BMH1	protein_coding	3UTR	-4.1284	6.15154e-08	5.12065e-06	TRUE
YDR308C	SRB7	protein_coding	3UTR	-8.87719	6.18549e-08	1.79814e-05	TRUE
YAL019W	FUN30	protein_coding	exon	-2.4068	6.20258e-08	6.74561e-06	TRUE
YMR190C	SGS1	protein_coding	3UTR	-3.51072	6.24358e-08	6.68423e-06	TRUE
YOR133W	EFT1	protein_coding	3UTR	-2.03016	6.29246e-08	3.33993e-06	TRUE
YKL192C	ACP1	protein_coding	3UTR	-2.87204	6.38777e-08	4.05903e-05	TRUE
YDR500C	RPL37B	protein_coding	3UTR	-1.6978	6.40102e-08	3.39198e-06	TRUE
YKR095W	MLP1	protein_coding	exon	-2.24173	6.41049e-08	6.44181e-06	TRUE
YIL028W	YIL028W	protein_coding	3UTR	-8.80673	6.44832e-08	8.74526e-06	TRUE
YKL100C	YPF1	protein_coding	3UTR	-3.49299	6.73295e-08	7.18384e-06	TRUE
YLL026W	HSP104	protein_coding	exon	-2.22831	6.91012e-08	4.79315e-06	TRUE
YML028W	TSA1	protein_coding	3UTR	-2.42374	7.01738e-08	1.16692e-05	TRUE
YCL037C	SRO9	protein_coding	exon	2.6126	7.04824e-08	4.51214e-06	TRUE
YHR183W	GND1	protein_coding	exon	-1.58156	7.05517e-08	3.80768e-06	TRUE
YOR309C	YOR309C	protein_coding	exon	-1.34854	7.19648e-08	4.30858e-06	TRUE
YGR094W	VAS1	protein_coding	exon	-1.74281	7.38579e-08	3.96683e-06	TRUE
YNL155W	CUZ1	protein_coding	exon	-2.66614	7.5188e-08	7.21472e-06	TRUE
YMR276W	DSK2	protein_coding	3UTR	-2.56514	7.53035e-08	8.07723e-06	TRUE
YJL151C	SNA3	protein_coding	3UTR	-2.29693	7.55619e-08	7.84769e-06	TRUE
YKR061W	KTR2	protein_coding	3UTR	1.66524	7.69627e-08	4.56207e-06	TRUE
YKL181W	PRS1	protein_coding	3UTR	-4.97412	7.7674e-08	1.51519e-05	TRUE
YDL070W	BDF2	protein_coding	3UTR	-3.2366	7.82203e-08	7.45793e-06	TRUE
YNL191W	DUG3	protein_coding	3UTR	-8.94555	8.05702e-08	8.13656e-05	TRUE
YLR448W	RPL6B	protein_coding	exon	-1.39661	8.1375e-08	4.46683e-06	TRUE
YDL130W-A	STF1	protein_coding	3UTR	-3.52676	8.17314e-08	1.3744e-05	TRUE
YEL054C	RPL12A	protein_coding	3UTR	-1.6449	8.78385e-08	4.77616e-06	TRUE
YGL181W	GTS1	protein_coding	3UTR	-8.88312	8.86259e-08	2.25446e-05	TRUE
YHR129C	ARP1	protein_coding	3UTR	-4.97088	8.94567e-08	1.39024e-05	TRUE
YIL018W	RPL2B	protein_coding	3UTR	-2.6449	8.98634e-08	9.12909e-06	TRUE
YLR043C	TRX1	protein_coding	3UTR	-2.82982	9.28311e-08	8.90587e-06	TRUE
YPL252C	YAH1	protein_coding	3UTR	-2.82233	9.42512e-08	1.22673e-05	TRUE
YHR089C	GAR1	protein_coding	3UTR	-3.47217	9.51296e-08	9.9252e-06	TRUE
YKL065C	YET1	protein_coding	3UTR	-2.74238	9.64707e-08	9.81671e-06	TRUE
YOL026C	MIM1	protein_coding	3UTR	-3.82093	9.65406e-08	1.83491e-05	TRUE
YDR346C	SVF1	protein_coding	3UTR	-4.19709	9.87376e-08	1.88041e-05	TRUE
YIL123W	SIM1	protein_coding	3UTR	-2.20271	1.04467e-07	9.91559e-06	TRUE
YHR187W	IKI1	protein_coding	exon	-3.77096	1.05878e-07	1.61583e-05	TRUE
YBR092C	PHO3	protein_coding	3UTR	-5.03141	1.06345e-07	2.88718e-05	TRUE
YBR048W	RPS11B	protein_coding	3UTR	-3.44468	1.08651e-07	1.09581e-05	TRUE
YLR300W	EXG1	protein_coding	3UTR	-3.27166	1.08706e-07	2.04849e-05	TRUE
YJL189W	RPL39	protein_coding	exon	1.44133	1.15647e-07	6.57856e-06	TRUE
YJL177W	RPL17B	protein_coding	3UTR	-2.81022	1.16733e-07	1.15325e-05	TRUE
YIL153W	RRD1	protein_coding	exon	-2.87732	1.19471e-07	2.03282e-05	TRUE
YJL001W	PRE3	protein_coding	3UTR	-2.75072	1.19826e-07	1.22158e-05	TRUE
YBL087C	RPL23A	protein_coding	3UTR	-3.16498	1.23029e-07	7.39941e-06	TRUE
YER075C	PTP3	protein_coding	3UTR	-3.77254	1.23498e-07	2.10875e-05	TRUE
YKL067W	YNK1	protein_coding	exon	-2.07431	1.23961e-07	7.45178e-06	TRUE
YPL253C	VIK1	protein_coding	5UTR	-2.82192	1.24411e-07	2.96849e-05	TRUE
YGR078C	PAC10	protein_coding	3UTR	-2.02848	1.24766e-07	1.23587e-05	TRUE
YGL027C	CWH41	protein_coding	5UTR	-2.64835	1.24955e-07	1.23717e-05	TRUE
YKR092C	SRP40	protein_coding	3UTR	-4.9027	1.25279e-07	1.24646e-05	TRUE
YGL129C	RSM23	protein_coding	3UTR	-3.54773	1.25573e-07	3.05181e-05	TRUE
YDR349C	YPS7	protein_coding	3UTR	-8.87886	1.2682e-07	6.62874e-05	TRUE
YDR417C	YDR417C	protein_coding	5UTR	-2.89806	1.27009e-07	1.15276e-05	TRUE
YDL167C	NRP1	protein_coding	3UTR	-8.73128	1.31981e-07	1.969e-05	TRUE
YNL112W	DBP2	protein_coding	exon	2.34336	1.35496e-07	8.07716e-06	TRUE
YPL037C	EGD1	protein_coding	3UTR	-8.81143	1.39159e-07	3.64295e-05	TRUE
YAL026C-A	YAL026C-A	protein_coding	exon	-3.26139	1.42814e-07	1.77358e-05	TRUE
YEL016C	NPP2	protein_coding	3UTR	-5.03001	1.44685e-07	3.72432e-05	TRUE
YPL232W	SSO1	protein_coding	exon	-2.69561	1.45811e-07	2.38476e-05	TRUE
YDL212W	SHR3	protein_coding	3UTR	-4.18173	1.46994e-07	2.31558e-05	TRUE
YPL142C	YPL142C	protein_coding	exon	-1.72151	1.48609e-07	6.70403e-06	TRUE
YLR206W	ENT2	protein_coding	3UTR	-4.97226	1.53997e-07	3.20572e-05	TRUE
YMR143W	RPS16A	protein_coding	exon	-1.62499	1.56694e-07	7.74162e-06	TRUE
YLR421C	RPN13	protein_coding	3UTR	-1.68893	1.60294e-07	7.97707e-06	TRUE
YER074W-A	YOS1	protein_coding	exon	-3.06661	1.60427e-07	2.02542e-05	TRUE
YNL030W	HHF2	protein_coding	exon	-1.66283	1.60727e-07	7.19285e-06	TRUE
YER064C	VHR2	protein_coding	3UTR	-3.67913	1.61772e-07	1.55958e-05	TRUE
YMR092C	AIP1	protein_coding	3UTR	-3.45199	1.70628e-07	2.55774e-05	TRUE
YMR299C	DYN3	protein_coding	5UTR	-8.80561	1.72056e-07	4.11723e-05	TRUE
YDL171C	GLT1	protein_coding	3UTR	-8.65325	1.72418e-07	1.64776e-05	TRUE
YNR022C	MRPL50	protein_coding	3UTR	-2.48015	1.72702e-07	1.63328e-05	TRUE
YDL184C	RPL41A	protein_coding	3UTR	-4.07044	1.7345e-07	1.63962e-05	TRUE
YPR091C	NVJ2	protein_coding	3UTR	-4.95777	1.76493e-07	2.65297e-05	TRUE
YDL208W	NHP2	protein_coding	exon	-2.26991	1.76802e-07	8.56454e-06	TRUE
YML055W	SPC2	protein_coding	exon	-4.83809	1.77136e-07	1.69088e-05	TRUE
YJL008C	CCT8	protein_coding	3UTR	-8.65497	1.79862e-07	1.72531e-05	TRUE
YBL039C	URA7	protein_coding	exon	2.0188	1.81056e-07	8.78878e-06	TRUE
YDL235C	YPD1	protein_coding	3UTR	-3.41452	1.83663e-07	1.75229e-05	TRUE
YJL174W	KRE9	protein_coding	3UTR	-2.65683	1.90094e-07	3.32051e-05	TRUE
YIL142W	CCT2	protein_coding	3UTR	-1.96816	1.90921e-07	1.83491e-05	TRUE
YGR252W	GCN5	protein_coding	3UTR	-1.56171	1.94812e-07	9.3745e-06	TRUE
YKL004W	AUR1	protein_coding	exon	-2.91257	1.94911e-07	1.84806e-05	TRUE
YBR291C	CTP1	protein_coding	3UTR	-8.72668	1.95599e-07	5.3309e-05	TRUE
YCL028W	RNQ1	protein_coding	exon	3.20723	1.97039e-07	2.40409e-05	TRUE
YBR068C	BAP2	protein_coding	3UTR	-2.3771	2.06031e-07	1.96258e-05	TRUE
YOR264W	DSE3	protein_coding	3UTR	-3.72111	2.06281e-07	3.51088e-05	TRUE
YJL127C-B	YJL127C-B	protein_coding	3UTR	-5.03418	2.10636e-07	0.000184944	TRUE
YGR204W	ADE3	protein_coding	3UTR	-4.14272	2.12491e-07	2.98618e-05	TRUE
Q0020	15S_RRNA	rRNA	exon	1.41752	2.30638e-07	1.1282e-05	TRUE
YKL006W	RPL14A	protein_coding	exon	2.97514	2.38627e-07	2.21316e-05	TRUE
YKL210W	UBA1	protein_coding	3UTR	-3.62047	2.49257e-07	2.26667e-05	TRUE
YIL064W	EFM4	protein_coding	3UTR	-2.24794	2.54116e-07	2.13664e-05	TRUE
YBL070C	YBL070C	protein_coding	5UTR	-3.77415	2.59503e-07	5.73408e-05	TRUE
YPL163C	SVS1	protein_coding	3UTR	-2.07585	2.62052e-07	2.2516e-05	TRUE
YOR277C	YOR277C	protein_coding	exon	-2.53447	2.69482e-07	1.46079e-05	TRUE
YKL026C	GPX1	protein_coding	5UTR	-2.62836	2.71151e-07	4.51659e-05	TRUE
YLR075W	RPL10	protein_coding	3UTR	-4.01679	2.71356e-07	1.92084e-05	TRUE
YPR080W	TEF1	protein_coding	exon	9.01554	2.7848e-07	8.81393e-05	TRUE
YEL044W	IES6	protein_coding	3UTR	-4.13339	2.8084e-07	7.56433e-05	TRUE
YBL007C	SLA1	protein_coding	3UTR	-4.84142	2.82028e-07	3.2989e-05	TRUE
YNR016C	ACC1	protein_coding	3UTR	-2.15523	2.84526e-07	1.28273e-05	TRUE
YDR385W	EFT2	protein_coding	3UTR	-2.31	2.91789e-07	2.60175e-05	TRUE
YGR189C	CRH1	protein_coding	3UTR	-4.903	2.94152e-07	7.5051e-05	TRUE
YGR187C	HGH1	protein_coding	3UTR	-8.65306	2.9423e-07	4.46665e-05	TRUE
YDL148C	NOP14	protein_coding	3UTR	-4.06406	2.94242e-07	2.70428e-05	TRUE
YMR080C	NAM7	protein_coding	3UTR	-2.98192	2.98095e-07	2.65236e-05	TRUE
YDR460W	TFB3	protein_coding	3UTR	-1.40192	3.00021e-07	1.37548e-05	TRUE
YIL126W	STH1	protein_coding	exon	-3.24497	3.00464e-07	6.95461e-05	TRUE
YLR043C	TRX1	protein_coding	5UTR	-2.05728	3.0943e-07	1.42669e-05	TRUE
YBR011C	IPP1	protein_coding	exon	1.47973	3.1067e-07	1.29234e-05	TRUE
YHL034C	SBP1	protein_coding	3UTR	-4.90891	3.16368e-07	5.91594e-05	TRUE
YLR348C	DIC1	protein_coding	3UTR	-2.78078	3.24189e-07	3.72696e-05	TRUE
YBR121C	GRS1	protein_coding	3UTR	-3.33455	3.26951e-07	2.65656e-05	TRUE
YOL094C	RFC4	protein_coding	3UTR	-8.73282	3.31445e-07	6.92615e-05	TRUE
YKL008C	LAC1	protein_coding	3UTR	-8.72696	3.33271e-07	7.06942e-05	TRUE
YMR202W	ERG2	protein_coding	3UTR	-4.14194	3.34792e-07	6.21027e-05	TRUE
YML001W	YPT7	protein_coding	3UTR	-4.89886	3.41581e-07	8.77992e-05	TRUE
YMR083W	ADH3	protein_coding	exon	-1.81969	3.43668e-07	1.99907e-05	TRUE
YGR214W	RPS0A	protein_coding	3UTR	-3.1487	3.43719e-07	3.0663e-05	TRUE
YGR060W	ERG25	protein_coding	3UTR	-2.47469	3.56488e-07	5.68065e-05	TRUE
YGR234W	YHB1	protein_coding	3UTR	-2.29952	3.5777e-07	2.40409e-05	TRUE
YPR063C	YPR063C	protein_coding	3UTR	-1.66588	3.61313e-07	1.58417e-05	TRUE
YMR083W	ADH3	protein_coding	3UTR	-2.32877	3.64534e-07	5.7789e-05	TRUE
YGL041C-B	YGL041C-B	protein_coding	5UTR	-2.98029	3.67208e-07	3.16562e-05	TRUE
YPL009C	RQC2	protein_coding	exon	-1.46689	3.68779e-07	2.11675e-05	TRUE
YIL124W	AYR1	protein_coding	exon	-4.01165	3.6907e-07	3.02829e-05	TRUE
YDL213C	NOP6	protein_coding	3UTR	-2.68476	3.69353e-07	3.64723e-05	TRUE
YOL150C	YOL150C	protein_coding	3UTR	3.80398	3.72609e-07	3.2555e-05	TRUE
YML100W	TSL1	protein_coding	exon	-8.56694	3.75393e-07	3.32284e-05	TRUE
YLR347C	KAP95	protein_coding	5UTR	-3.19608	3.81022e-07	5.24628e-05	TRUE
YGR167W	CLC1	protein_coding	exon	-1.585	3.83338e-07	1.73032e-05	TRUE
YKR080W	MTD1	protein_coding	3UTR	-3.62534	3.83496e-07	3.32284e-05	TRUE
YGL148W	ARO2	protein_coding	3UTR	-2.46184	3.83606e-07	2.55774e-05	TRUE
YER176W	ECM32	protein_coding	3UTR	-2.66834	3.89626e-07	5.19594e-05	TRUE
YDL157C	YDL157C	protein_coding	3UTR	-4.77718	3.91043e-07	3.33559e-05	TRUE
YOR210W	RPB10	protein_coding	3UTR	-2.1772	3.95875e-07	2.68053e-05	TRUE
YPL079W	RPL21B	protein_coding	exon	-1.47859	4.03613e-07	1.7481e-05	TRUE
YPR160W	GPH1	protein_coding	exon	-3.56992	4.05707e-07	3.28035e-05	TRUE
YDR166C	SEC5	protein_coding	3UTR	-4.90597	4.1031e-07	8.99179e-05	TRUE
YDL193W	NUS1	protein_coding	3UTR	-4.83496	4.23238e-07	6.42991e-05	TRUE
YKL145W-A	YKL145W-A	protein_coding	5UTR	-8.56336	4.23609e-07	5.58394e-05	TRUE
snR86	snR86	snoRNA	exon	1.56273	4.27912e-07	1.88816e-05	TRUE
YHR008C	SOD2	protein_coding	3UTR	-2.02931	4.33665e-07	3.34458e-05	TRUE
YMR196W	YMR196W	protein_coding	exon	-3.38137	4.4075e-07	6.22996e-05	TRUE
YNL154C	YCK2	protein_coding	3UTR	-2.73892	4.45372e-07	3.7749e-05	TRUE
YER055C	HIS1	protein_coding	3UTR	-8.56163	4.47432e-07	4.86717e-05	TRUE
YKL017C	HCS1	protein_coding	3UTR	-8.64672	4.69956e-07	0.000101896	TRUE
YGL173C	XRN1	protein_coding	3UTR	-1.66768	4.72241e-07	2.08183e-05	TRUE
YLL018C	DPS1	protein_coding	3UTR	-2.94947	4.76579e-07	3.67382e-05	TRUE
YLR249W	YEF3	protein_coding	exon	1.39606	4.81633e-07	2.17081e-05	TRUE
YPR073C	LTP1	protein_coding	3UTR	-2.48142	4.86047e-07	4.12515e-05	TRUE
YEL027W	VMA3	protein_coding	3UTR	-4.07541	4.9785e-07	7.11286e-05	TRUE
YPL007C	TFC8	protein_coding	3UTR	-8.65433	5.04203e-07	0.000110806	TRUE
YPR036W-A	SPO24	protein_coding	3UTR	-2.24093	5.06135e-07	2.17936e-05	TRUE
YJL152W	YJL152W	protein_coding	exon	-1.36209	5.36788e-07	2.30742e-05	TRUE
YCR035C	RRP43	protein_coding	3UTR	-8.56503	5.42476e-07	7.94369e-05	TRUE
YBR073W	RDH54	protein_coding	5UTR	-4.06938	5.46568e-07	9.37976e-05	TRUE
YNL066W	SUN4	protein_coding	3UTR	-3.09872	5.49319e-07	4.48227e-05	TRUE
YPL008W	CHL1	protein_coding	3UTR	-8.65428	5.63568e-07	0.000118493	TRUE
YLR264W	RPS28B	protein_coding	3UTR	-3.55977	5.68687e-07	4.61255e-05	TRUE
YPR041W	TIF5	protein_coding	5UTR	-3.06552	5.68824e-07	0.000107647	TRUE
YML035C	AMD1	protein_coding	3UTR	-4.76211	5.72422e-07	4.7095e-05	TRUE
YLR076C	YLR076C	protein_coding	exon	-1.59804	5.72766e-07	2.44415e-05	TRUE
YHR094C	HXT1	protein_coding	3UTR	-2.92027	5.98368e-07	4.81714e-05	TRUE
YKL195W	MIA40	protein_coding	exon	-1.82905	5.99628e-07	3.82163e-05	TRUE
RDN37-1	RDN37-1	rRNA	exon	-1.82702	6.04971e-07	8.00271e-05	TRUE
YGL122C	NAB2	protein_coding	3UTR	-4.83966	6.09407e-07	0.00014361	TRUE
YLL018C-A	COX19	protein_coding	5UTR	-2.80863	6.09552e-07	4.89131e-05	TRUE
YGL136C	MRM2	protein_coding	3UTR	-3.04869	6.12735e-07	3.89743e-05	TRUE
YHR042W	NCP1	protein_coding	3UTR	-3.10182	6.14844e-07	4.99159e-05	TRUE
YPL048W	CAM1	protein_coding	3UTR	-4.77522	6.16388e-07	8.24154e-05	TRUE
YKR095W	MLP1	protein_coding	3UTR	-2.26852	6.19762e-07	5.3121e-05	TRUE
YFR031C-A	RPL2A	protein_coding	exon	2.19221	6.22013e-07	3.3412e-05	TRUE
YNL015W	PBI2	protein_coding	exon	-2.39659	6.26235e-07	5.11438e-05	TRUE
YNL268W	LYP1	protein_coding	3UTR	-4.8993	6.33534e-07	0.000122	TRUE
YDL229W	SSB1	protein_coding	3UTR	-8.46419	6.73448e-07	5.39306e-05	TRUE
YML121W	GTR1	protein_coding	3UTR	-3.16069	6.81659e-07	9.76801e-05	TRUE
YHL035C	VMR1	protein_coding	5UTR	-4.84111	6.82248e-07	8.46383e-05	TRUE
YKR057W	RPS21A	protein_coding	exon	-1.69582	6.8666e-07	2.86057e-05	TRUE
YKL096W	CWP1	protein_coding	3UTR	-4.8455	6.90979e-07	0.000142329	TRUE
YOL006C	TOP1	protein_coding	5UTR	-2.83547	6.9123e-07	9.94015e-05	TRUE
YHR081W	LRP1	protein_coding	exon	-1.74992	7.03295e-07	5.24803e-05	TRUE
YBR153W	RIB7	protein_coding	3UTR	-3.12829	7.11874e-07	7.02363e-05	TRUE
YBR031W	RPL4A	protein_coding	exon	4.58178	7.12061e-07	0.000167138	TRUE
YOR261C	RPN8	protein_coding	3UTR	-2.50665	7.23074e-07	5.37541e-05	TRUE
YGL135W	RPL1B	protein_coding	exon	1.9175	7.32761e-07	3.0549e-05	TRUE
YGR082W	TOM20	protein_coding	exon	-3.06043	7.33183e-07	5.44038e-05	TRUE
YPL170W	DAP1	protein_coding	3UTR	-3.03725	7.3775e-07	0.000202707	TRUE
YGR184C	UBR1	protein_coding	5UTR	-3.28425	7.4916e-07	5.8068e-05	TRUE
YCL026C-B	HBN1	protein_coding	3UTR	3.41532	7.62414e-07	0.000168364	TRUE
YDL048C	STP4	protein_coding	3UTR	-4.14153	7.63056e-07	0.000544055	TRUE
YGR284C	ERV29	protein_coding	3UTR	-2.61384	7.69809e-07	6.04592e-05	TRUE
YDR026C	NSI1	protein_coding	3UTR	-2.64586	7.75959e-07	4.67958e-05	TRUE
YBR089C-A	NHP6B	protein_coding	5UTR	-4.76537	8.02775e-07	9.51453e-05	TRUE
YCR024C-B	YCR024C-B	protein_coding	5UTR	-1.6407	8.17471e-07	3.92332e-05	TRUE
YPR187W	RPO26	protein_coding	exon	-2.46905	8.34091e-07	4.97091e-05	TRUE
YEL001C	IRC22	protein_coding	3UTR	-2.27119	8.39445e-07	5.93399e-05	TRUE
YFR031C	SMC2	protein_coding	5UTR	-2.88506	8.43446e-07	5.96009e-05	TRUE
YMR308C	PSE1	protein_coding	3UTR	-3.25815	8.47342e-07	6.42991e-05	TRUE
YLR399C	BDF1	protein_coding	3UTR	-3.28245	8.51652e-07	6.91821e-05	TRUE
YDL055C	PSA1	protein_coding	3UTR	-8.36747	8.63978e-07	5.11438e-05	TRUE
YOR322C	LDB19	protein_coding	5UTR	-2.35278	8.64013e-07	5.21496e-05	TRUE
YDR432W	NPL3	protein_coding	3UTR	-2.16942	8.71732e-07	5.25561e-05	TRUE
YNL121C	TOM70	protein_coding	3UTR	-1.93014	8.93848e-07	4.23521e-05	TRUE
YDL075W	RPL31A	protein_coding	exon	1.85754	8.98397e-07	4.60214e-05	TRUE
YLR060W	FRS1	protein_coding	3UTR	-8.55704	9.15177e-07	0.000144797	TRUE
YDR404C	RPB7	protein_coding	3UTR	-2.53935	9.20864e-07	0.000126328	TRUE
YDR232W	HEM1	protein_coding	3UTR	-2.96137	9.24969e-07	0.000117435	TRUE
YJR015W	YJR015W	protein_coding	3UTR	-8.4661	9.5979e-07	9.24094e-05	TRUE
YHR094C	HXT1	protein_coding	exon	-2.74705	9.6681e-07	6.83671e-05	TRUE
YBL099W	ATP1	protein_coding	exon	-1.84829	9.75659e-07	3.7758e-05	TRUE
YMR203W	TOM40	protein_coding	3UTR	-3.67501	9.84391e-07	0.000177968	TRUE
YGR031C-A	NAG1	protein_coding	5UTR	-3.32236	9.87951e-07	0.000120947	TRUE
YCR066W	RAD18	protein_coding	3UTR	-3.61021	9.88961e-07	0.000134255	TRUE
YOL121C	RPS19A	protein_coding	3UTR	-1.38125	9.98941e-07	3.60405e-05	TRUE
YDL086C-A	YDL086C-A	protein_coding	5UTR	-2.30539	1.00115e-06	7.40815e-05	TRUE
YLR264C-A	YLR264C-A	protein_coding	3UTR	-1.76209	1.00937e-06	3.88117e-05	TRUE
YEL017W	GTT3	protein_coding	3UTR	-3.36246	1.01053e-06	0.00035505	TRUE
YNL251C	NRD1	protein_coding	exon	-8.56479	1.0185e-06	0.000196756	TRUE
YKR066C	CCP1	protein_coding	3UTR	-2.66032	1.02124e-06	7.71173e-05	TRUE
YER011W	TIR1	protein_coding	3UTR	-3.6172	1.03589e-06	0.000139431	TRUE
YER178W	PDA1	protein_coding	exon	-1.67118	1.047e-06	4.14424e-05	TRUE
YLR018C	POM34	protein_coding	3UTR	-4.76278	1.05177e-06	0.000233097	TRUE
YHR039C	MSC7	protein_coding	5UTR	-3.20456	1.06379e-06	6.22172e-05	TRUE
YBL092W	RPL32	protein_coding	exon	1.20278	1.1102e-06	4.46837e-05	TRUE
YDR496C	PUF6	protein_coding	3UTR	-4.7701	1.12638e-06	0.000149173	TRUE
YNL251C	NRD1	protein_coding	3UTR	-8.56326	1.12708e-06	0.000216676	TRUE
YMR146C	TIF34	protein_coding	3UTR	-3.01753	1.13349e-06	7.83405e-05	TRUE
YOR303W	CPA1	protein_coding	exon	-2.57436	1.16038e-06	8.99447e-05	TRUE
YGL174W	BUD13	protein_coding	3UTR	-1.56916	1.16827e-06	4.51659e-05	TRUE
YJL001W	PRE3	protein_coding	exon	-1.58277	1.20362e-06	4.53007e-05	TRUE
YER178W	PDA1	protein_coding	3UTR	-2.13131	1.22875e-06	6.85909e-05	TRUE
YPL154C	PEP4	protein_coding	3UTR	-4.02031	1.23717e-06	0.000232995	TRUE
YNL032W	SIW14	protein_coding	exon	-2.54395	1.24414e-06	8.8996e-05	TRUE
YLR010C	TEN1	protein_coding	3UTR	-4.00304	1.26265e-06	0.000164672	TRUE
YPL004C	LSP1	protein_coding	exon	-1.53132	1.26395e-06	4.98096e-05	TRUE
YBL007C	SLA1	protein_coding	exon	2.99198	1.27694e-06	7.08775e-05	TRUE
YOR052C	YOR052C	protein_coding	3UTR	-2.68722	1.27961e-06	0.000164471	TRUE
YDL191W	RPL35A	protein_coding	exon	3.33387	1.29579e-06	0.00013839	TRUE
YDL055C	PSA1	protein_coding	exon	-1.42962	1.30313e-06	5.48699e-05	TRUE
YNL007C	SIS1	protein_coding	exon	-1.84322	1.30389e-06	5.73007e-05	TRUE
YER025W	GCD11	protein_coding	exon	1.62662	1.309e-06	5.12349e-05	TRUE
YBR010W	HHT1	protein_coding	exon	-1.35884	1.33592e-06	5.09608e-05	TRUE
YDR133C	YDR133C	protein_coding	3UTR	-3.51803	1.33917e-06	9.56743e-05	TRUE
YMR038C	CCS1	protein_coding	exon	-1.31342	1.34227e-06	4.96357e-05	TRUE
YGR180C	RNR4	protein_coding	3UTR	-3.88558	1.34859e-06	9.53661e-05	TRUE
YKL065C	YET1	protein_coding	exon	-1.80226	1.35333e-06	6.42989e-05	TRUE
YIR038C	GTT1	protein_coding	3UTR	-2.88018	1.35512e-06	9.71132e-05	TRUE
YNL081C	SWS2	protein_coding	5UTR	-8.65277	1.35894e-06	1	FALSE
YDL131W	LYS21	protein_coding	3UTR	-4.77007	1.35942e-06	0.000260648	TRUE
YGR234W	YHB1	protein_coding	exon	-1.47975	1.36271e-06	5.68902e-05	TRUE
YIL099W	SGA1	protein_coding	5UTR	-4.08514	1.39194e-06	0.000840314	TRUE
YPR132W	RPS23B	protein_coding	exon	2.10527	1.39997e-06	9.03588e-05	TRUE
YDR060W	MAK21	protein_coding	exon	-2.61292	1.41358e-06	9.22561e-05	TRUE
YJL217W	REE1	protein_coding	3UTR	-3.55693	1.41648e-06	0.000164492	TRUE
YDR385W	EFT2	protein_coding	exon	8.76289	1.4179e-06	0.000155418	TRUE
YGR082W	TOM20	protein_coding	3UTR	-3.94991	1.42039e-06	0.000149075	TRUE
YMR002W	MIX17	protein_coding	3UTR	-2.60365	1.45928e-06	9.47899e-05	TRUE
YLR349W	YLR349W	protein_coding	5UTR	-2.56835	1.4846e-06	0.000135382	TRUE
YDR079C-A	TFB5	protein_coding	3UTR	-3.09581	1.48505e-06	0.000161881	TRUE
YDR277C	MTH1	protein_coding	exon	-3.96868	1.48747e-06	0.000180625	TRUE
YOL039W	RPP2A	protein_coding	5UTR	-1.1522	1.50998e-06	6.20965e-05	TRUE
tL(GAG)G	tL(GAG)G	tRNA	exon	-4.61966	0.232746	1	FALSE
YBR058C-A	TSC3	protein_coding	3UTR	-1.56349	1.53958e-06	6.68125e-05	TRUE
YPR133C	SPN1	protein_coding	3UTR	-3.49851	1.54989e-06	0.000110749	TRUE
YHR154W	RTT107	protein_coding	3UTR	-3.953	1.58451e-06	0.000169513	TRUE
YIL126W	STH1	protein_coding	3UTR	-4.76612	1.59657e-06	0.00029211	TRUE
YKR042W	UTH1	protein_coding	exon	-1.59113	1.59711e-06	5.71718e-05	TRUE
YPR108W	RPN7	protein_coding	exon	-1.7892	1.62282e-06	8.69082e-05	TRUE
YDR466W	PKH3	protein_coding	3UTR	-8.46476	1.65421e-06	0.000193169	TRUE
YDR450W	RPS18A	protein_coding	3UTR	-1.24404	1.67022e-06	6.09843e-05	TRUE
RDN25-1	RDN25-1	rRNA	exon	-2.03052	1.6817e-06	0.000212636	TRUE
YDR467C	YDR467C	protein_coding	exon	-8.46478	1.68795e-06	0.000348198	TRUE
YJL033W	HCA4	protein_coding	3UTR	-8.55297	1.70685e-06	0.000284012	TRUE
YNL268W	LYP1	protein_coding	exon	-2.44184	1.71503e-06	0.00010845	TRUE
YGR145W	ENP2	protein_coding	3UTR	-8.56617	1.72351e-06	0.000279375	TRUE
YPL063W	TIM50	protein_coding	3UTR	-3.35061	1.73147e-06	0.000803406	TRUE
YCR012W	PGK1	protein_coding	exon	1.15627	1.75294e-06	7.01193e-05	TRUE
YPR041W	TIF5	protein_coding	3UTR	-3.87892	1.75603e-06	0.000120865	TRUE
YNL112W	DBP2	protein_coding	3UTR	-3.9544	1.77288e-06	0.000220723	TRUE
YFR017C	IGD1	protein_coding	3UTR	-4.76905	1.7796e-06	0.000289648	TRUE
YBR196C	PGI1	protein_coding	exon	1.40436	1.78763e-06	6.48827e-05	TRUE
YCR013C	YCR013C	protein_coding	exon	-1.93185	1.81935e-06	8.29461e-05	TRUE
YKL156W	RPS27A	protein_coding	3UTR	-2.43032	1.83176e-06	0.000114888	TRUE
YOR045W	TOM6	protein_coding	3UTR	-3.50181	1.86001e-06	0.000127215	TRUE
YOR194C	TOA1	protein_coding	3UTR	-4.69703	1.86758e-06	0.000230835	TRUE
YPR145W	ASN1	protein_coding	exon	-1.46141	1.88199e-06	6.78417e-05	TRUE
YJL010C	NOP9	protein_coding	3UTR	-8.56323	1.92035e-06	0.00120921	TRUE
YIL004C	BET1	protein_coding	3UTR	-8.47116	1.93713e-06	0.000383131	TRUE
YKR059W	TIF1	protein_coding	exon	8.63155	1.96574e-06	0.000132814	TRUE
YML124C	TUB3	protein_coding	5UTR	-4.59047	1.99592e-06	0.000398794	TRUE
YMR251W-A	HOR7	protein_coding	3UTR	-4.54625	2.02401e-06	0.00010697	TRUE
YLR413W	INA1	protein_coding	3UTR	-4.69235	2.04595e-06	0.000231952	TRUE
YBL038W	MRPL16	protein_coding	exon	8.70721	2.04966e-06	0.000248883	TRUE
YLR029C	RPL15A	protein_coding	exon	1.25343	2.05588e-06	8.04048e-05	TRUE
YPR102C	RPL11A	protein_coding	exon	4.49445	2.09256e-06	0.000362729	TRUE
YDR449C	UTP6	protein_coding	3UTR	-8.46338	2.09652e-06	0.000220838	TRUE
YJL158C	CIS3	protein_coding	exon	1.87173	2.12318e-06	8.77721e-05	TRUE
YPL199C	YPL199C	protein_coding	3UTR	-8.37292	2.14922e-06	0.00021379	TRUE
YAR018C	KIN3	protein_coding	3UTR	-3.51256	2.15912e-06	0.000256842	TRUE
YGR124W	ASN2	protein_coding	3UTR	-2.70203	2.19179e-06	0.000144797	TRUE
YDL075W	RPL31A	protein_coding	3UTR	-4.7	2.1976e-06	0.000234527	TRUE
YGL041W-A	YGL041W-A	protein_coding	exon	-2.60339	2.20203e-06	0.00014436	TRUE
YNL061W	NOP2	protein_coding	3UTR	-4.69086	2.20375e-06	0.000413687	TRUE
YLR269C	YLR269C	protein_coding	5UTR	-2.20184	2.25001e-06	0.000256589	TRUE
YHR072W-A	NOP10	protein_coding	exon	-1.36058	2.35002e-06	8.12333e-05	TRUE
YDR062W	LCB2	protein_coding	3UTR	-3.49557	2.35375e-06	0.000194582	TRUE
YBL091C	MAP2	protein_coding	exon	1.48375	2.36392e-06	8.16288e-05	TRUE
YCL011C	GBP2	protein_coding	exon	2.2223	2.3696e-06	0.000119592	TRUE
YGL103W	RPL28	protein_coding	exon	-1.15398	2.38867e-06	8.48799e-05	TRUE
YER165W	PAB1	protein_coding	exon	1.90387	2.39207e-06	8.04048e-05	TRUE
YLR154C	RNH203	protein_coding	3UTR	-8.56025	2.4042e-06	0.0078387	TRUE
YHR072W-A	NOP10	protein_coding	3UTR	-1.39305	2.40498e-06	8.34504e-05	TRUE
YLR359W	ADE13	protein_coding	3UTR	-8.46807	2.41364e-06	0.000403966	TRUE
YMR276W	DSK2	protein_coding	exon	-1.57324	2.4145e-06	0.000105579	TRUE
YKL114C	APN1	protein_coding	3UTR	-1.69732	2.4147e-06	0.000156413	TRUE
YFL023W	BUD27	protein_coding	exon	-2.99594	2.41769e-06	0.000167768	TRUE
YFL004W	VTC2	protein_coding	exon	4.32845	2.45931e-06	0.00015086	TRUE
YJR012C	YJR012C	protein_coding	exon	-2.89621	2.51093e-06	0.00025294	TRUE
YBR265W	TSC10	protein_coding	exon	8.6298	2.54819e-06	0.000275991	TRUE
YHR202W	YHR202W	protein_coding	3UTR	-3.88203	2.57637e-06	0.000189023	TRUE
YPR069C	SPE3	protein_coding	exon	-2.25878	2.60773e-06	0.000102904	TRUE
YMR220W	ERG8	protein_coding	3UTR	-3.26196	2.61847e-06	0.000436633	TRUE
YLR380W	CSR1	protein_coding	3UTR	-3.05035	2.62446e-06	0.000355257	TRUE
YKR082W	NUP133	protein_coding	exon	-2.71006	2.63088e-06	0.000170944	TRUE
YLR440C	SEC39	protein_coding	3UTR	-2.41883	2.64615e-06	0.000439428	TRUE
YLR313C	SPH1	protein_coding	5UTR	-4.69393	2.66028e-06	0.000444617	TRUE
YGL237C	HAP2	protein_coding	3UTR	-4.61508	2.70136e-06	0.000289967	TRUE
YLR259C	HSP60	protein_coding	3UTR	-4.53032	2.70376e-06	0.000163545	TRUE
YER117W	RPL23B	protein_coding	3UTR	-2.80658	2.71025e-06	0.000164123	TRUE
YCR004C	YCP4	protein_coding	3UTR	-2.45348	2.72135e-06	0.000137779	TRUE
YIL051C	MMF1	protein_coding	3UTR	-3.42631	2.73823e-06	0.000176307	TRUE
YDR123C	INO2	protein_coding	3UTR	-4.68995	2.74105e-06	0.000452342	TRUE
YAL060W	BDH1	protein_coding	exon	-4.62011	2.74586e-06	0.000293471	TRUE
YIL082W-A	YIL082W-A	transposable_element	exon	3.29341	2.77547e-06	0.000291894	TRUE
YMR073C	IRC21	protein_coding	exon	-3.94424	2.82317e-06	0.000475475	TRUE
YDR396W	YDR396W	protein_coding	5UTR	-2.78401	2.86861e-06	0.000181105	TRUE
YOR181W	LAS17	protein_coding	exon	-2.45335	2.90058e-06	0.000232874	TRUE
YPL063W	TIM50	protein_coding	exon	-1.82863	2.91348e-06	0.000185151	TRUE
YJL167W	ERG20	protein_coding	3UTR	-2.69128	2.92965e-06	0.000190571	TRUE
YPR081C	GRS2	protein_coding	3UTR	-2.90218	2.9444e-06	0.00012484	TRUE
YOR374W	ALD4	protein_coding	3UTR	-3.90099	2.95042e-06	0.00030625	TRUE
YFR024C-A	LSB3	protein_coding	3UTR	-2.99599	2.96323e-06	0.000341461	TRUE
YFR032C-A	RPL29	protein_coding	3UTR	-4.53529	2.96482e-06	0.000177536	TRUE
YJL004C	SYS1	protein_coding	3UTR	-4.68255	2.96633e-06	0.000485767	TRUE
YNR035C	ARC35	protein_coding	5UTR	-2.22785	2.96797e-06	0.000336266	TRUE
YML129C	COX14	protein_coding	3UTR	-3.50606	2.97165e-06	0.000528513	TRUE
YDL135C	RDI1	protein_coding	3UTR	-2.62169	2.99214e-06	0.000117296	TRUE
YDL097C	RPN6	protein_coding	3UTR	-2.84014	3.13794e-06	0.000223883	TRUE
YNL108C	YNL108C	protein_coding	3UTR	-2.80318	3.16761e-06	0.000200087	TRUE
YDR322C-A	TIM11	protein_coding	3UTR	-8.47108	3.17372e-06	0.000476703	TRUE
YBR249C	ARO4	protein_coding	exon	2.19224	3.20241e-06	0.000133837	TRUE
YKL141W	SDH3	protein_coding	3UTR	-4.69832	3.24223e-06	0.000491495	TRUE
YOL071W	YOL071W	protein_coding	3UTR	-4.69832	3.27457e-06	0.000481009	TRUE
YBR254C	TRS20	protein_coding	3UTR	-3.00495	3.35899e-06	0.000350929	TRUE
YJL052W	TDH1	protein_coding	3UTR	-4.53528	3.40838e-06	0.000213831	TRUE
YAL038W	CDC19	protein_coding	exon	1.10761	3.41183e-06	0.000114946	TRUE
YBR048W	RPS11B	protein_coding	exon	1.52013	3.4212e-06	0.000123693	TRUE
YDR238C	SEC26	protein_coding	3UTR	-1.93602	3.42638e-06	0.00016725	TRUE
YIL021C-A	YIL021C-A	protein_coding	5UTR	-2.99455	3.43889e-06	0.000355257	TRUE
YNL032W	SIW14	protein_coding	3UTR	-1.18923	3.43974e-06	0.000113172	TRUE
YGR180C	RNR4	protein_coding	5UTR	-2.14529	3.44772e-06	0.000227961	TRUE
YHR192W	LNP1	protein_coding	exon	-1.74884	3.44774e-06	0.000109943	TRUE
YIL075C	RPN2	protein_coding	exon	-1.26654	3.46476e-06	0.000110414	TRUE
YER094C	PUP3	protein_coding	3UTR	-2.14764	3.51926e-06	0.00017105	TRUE
YGL190C	CDC55	protein_coding	3UTR	-8.46516	3.5286e-06	0.000495216	TRUE
YGR027C	RPS25A	protein_coding	3UTR	-1.11936	3.59159e-06	0.000128985	TRUE
YPR170W-B	YPR170W-B	protein_coding	exon	-1.60103	3.59437e-06	0.000117304	TRUE
YGR026W	YGR026W	protein_coding	exon	-2.15522	3.59758e-06	0.00022012	TRUE
YNL008C	ASI3	protein_coding	5UTR	-8.46664	3.70197e-06	0.000540083	TRUE
YDR294C	DPL1	protein_coding	3UTR	-3.00337	3.72542e-06	0.000383718	TRUE
YJL166W	QCR8	protein_coding	3UTR	-3.88384	3.74111e-06	0.000413454	TRUE
YOR120W	GCY1	protein_coding	3UTR	-2.52545	3.74601e-06	0.000180655	TRUE
YLR056W	ERG3	protein_coding	3UTR	-3.88193	3.74913e-06	0.000477555	TRUE
YDR529C	QCR7	protein_coding	3UTR	-4.61993	3.7969e-06	0.000684908	TRUE
Q0050	AI1	protein_coding	exon	-2.44201	3.86185e-06	0.000124703	TRUE
YLR258W	GSY2	protein_coding	exon	-3.16516	3.86517e-06	0.000363041	TRUE
YLR048W	RPS0B	protein_coding	exon	3.59525	3.96406e-06	0.000241863	TRUE
YLL034C	RIX7	protein_coding	3UTR	-2.25366	3.98376e-06	0.000382757	TRUE
YGR185C	TYS1	protein_coding	exon	-1.36387	3.99033e-06	0.000128359	TRUE
YKL194C	MST1	protein_coding	3UTR	-1.93938	4.0096e-06	0.000245016	TRUE
YBR078W	ECM33	protein_coding	3UTR	-3.81088	4.065e-06	0.0002462	TRUE
YDL063C	SYO1	protein_coding	3UTR	-3.88339	4.13822e-06	0.000448555	TRUE
YBR263W	SHM1	protein_coding	exon	1.63387	4.24078e-06	0.000135533	TRUE
YLL035W	GRC3	protein_coding	3UTR	-2.05779	4.24208e-06	0.000254966	TRUE
YJR094W-A	RPL43B	protein_coding	3UTR	-4.53875	4.24784e-06	0.000256995	TRUE
YIL052C	RPL34B	protein_coding	exon	2.02461	4.29037e-06	0.000236767	TRUE
YPR033C	HTS1	protein_coding	3UTR	-2.42113	4.29091e-06	0.00020363	TRUE
YML123C	PHO84	protein_coding	exon	-8.37108	4.35238e-06	0.000398513	TRUE
YNR074C	AIF1	protein_coding	3UTR	-8.36795	4.36698e-06	0.000328494	TRUE
YLR256W	HAP1	protein_coding	exon	2.29045	4.37603e-06	0.000259428	TRUE
YKR066C	CCP1	protein_coding	exon	-2.4536	4.41386e-06	0.000264804	TRUE
YOL086W-A	MHF1	protein_coding	3UTR	-1.11978	4.43019e-06	0.00014361	TRUE
YJR042W	NUP85	protein_coding	exon	-8.36639	4.43255e-06	0.000677244	TRUE
YDR032C	PST2	protein_coding	3UTR	-2.23234	4.48666e-06	0.000211659	TRUE
YGR055W	MUP1	protein_coding	exon	-2.52227	4.51752e-06	0.000253002	TRUE
YML093W	UTP14	protein_coding	3UTR	-4.61371	4.52612e-06	0.000415368	TRUE
YFR033C	QCR6	protein_coding	3UTR	-2.33308	4.58628e-06	0.00041781	TRUE
YNL214W	PEX17	protein_coding	3UTR	-3.86619	4.60714e-06	0.000565343	TRUE
YJR043C	POL32	protein_coding	3UTR	-8.36641	4.60917e-06	0.000698825	TRUE
YPL211W	NIP7	protein_coding	3UTR	-3.43505	4.67249e-06	0.00034785	TRUE
YBL027W	RPL19B	protein_coding	3UTR	-1.68692	4.67431e-06	0.000184466	TRUE
YGR279C	SCW4	protein_coding	3UTR	-4.52188	4.76887e-06	0.000298391	TRUE
YDR098C	GRX3	protein_coding	exon	2.43621	4.88337e-06	0.000263639	TRUE
YJR047C	ANB1	protein_coding	5UTR	-3.88333	4.9146e-06	0.000740452	TRUE
YPL262W	FUM1	protein_coding	exon	-2.64354	4.9466e-06	0.000294351	TRUE
Q0158	21S_RRNA	rRNA	exon	-1.72993	4.96128e-06	0.000152877	TRUE
YGL038C	OCH1	protein_coding	5UTR	-4.6258	4.96846e-06	0.000771072	TRUE
YGL069C	YGL069C	protein_coding	5UTR	-3.78971	5.00129e-06	0.000375453	TRUE
YHR047C	AAP1	protein_coding	3UTR	-3.43977	5.00256e-06	0.000853079	TRUE
YMR308C	PSE1	protein_coding	exon	-3.0974	5.02229e-06	0.000297872	TRUE
YER165W	PAB1	protein_coding	5UTR	-1.67525	5.05598e-06	0.000156987	TRUE
YCL011C	GBP2	protein_coding	3UTR	-2.71678	5.12664e-06	0.000767713	TRUE
YJL052W	TDH1	protein_coding	5UTR	-2.58178	5.1819e-06	0.000201956	TRUE
YDL130W-A	STF1	protein_coding	exon	-1.70915	5.20917e-06	0.000204156	TRUE
YMR014W	BUD22	protein_coding	exon	-4.68152	5.21101e-06	0.00275423	TRUE
YMR236W	TAF9	protein_coding	3UTR	-2.92854	5.28153e-06	0.00030625	TRUE
YNL242W	ATG2	protein_coding	3UTR	-2.49718	5.29671e-06	0.00089725	TRUE
YPL094C	SEC62	protein_coding	3UTR	-1.57626	5.30256e-06	0.000284012	TRUE
YDL131W	LYS21	protein_coding	exon	-3.44691	5.30361e-06	0.000638341	TRUE
YPL129W	TAF14	protein_coding	3UTR	-8.36954	5.31254e-06	0.000783771	TRUE
YJR118C	ILM1	protein_coding	3UTR	-2.52532	5.31994e-06	0.00030987	TRUE
YOL089C	HAL9	protein_coding	5UTR	-4.69541	5.35089e-06	0.00870222	TRUE
YFR032C-A	RPL29	protein_coding	5UTR	-2.57574	5.39863e-06	0.000550683	TRUE
YKL060C	FBA1	protein_coding	exon	1.07315	5.41302e-06	0.000166334	TRUE
YGR264C	MES1	protein_coding	exon	2.21694	5.47682e-06	0.000192098	TRUE
YPR145W	ASN1	protein_coding	3UTR	-2.7358	5.54406e-06	0.000299798	TRUE
YBL058W	SHP1	protein_coding	exon	1.97803	5.67711e-06	0.000298817	TRUE
YOL135C	MED7	protein_coding	3UTR	-3.93718	5.75932e-06	0.00920364	TRUE
YKL077W	YKL077W	protein_coding	3UTR	-8.26366	5.82286e-06	0.000417419	TRUE
YDR064W	RPS13	protein_coding	exon	1.44596	5.84802e-06	0.000177968	TRUE
YDL150W	RPC53	protein_coding	3UTR	-2.94134	5.87125e-06	0.000494773	TRUE
YOR101W	RAS1	protein_coding	3UTR	-3.14771	5.88591e-06	0.000556676	TRUE
YLL021W	SPA2	protein_coding	3UTR	-3.15376	5.91285e-06	0.000529229	TRUE
YER088W-B	YER088W-B	protein_coding	5UTR	-1.60702	6.01577e-06	0.000343379	TRUE
YNL190W	YNL190W	protein_coding	3UTR	-3.38425	6.05867e-06	0.000526357	TRUE
YEL033W	MTC7	protein_coding	5UTR	1.52535	6.07888e-06	0.000182145	TRUE
YOR063W	RPL3	protein_coding	exon	1.18236	6.1011e-06	0.000184502	TRUE
YLR367W	RPS22B	protein_coding	exon	1.32812	6.13473e-06	0.000183653	TRUE
YKR013W	PRY2	protein_coding	3UTR	-4.53857	6.16907e-06	0.000618349	TRUE
YHR049C-A	YHR049C-A	protein_coding	5UTR	-2.00963	6.27474e-06	0.000274694	TRUE
YDR129C	SAC6	protein_coding	3UTR	-2.79613	6.31717e-06	0.000558751	TRUE
YLR075W	RPL10	protein_coding	exon	-1.33624	6.35691e-06	0.000195685	TRUE
YOR276W	CAF20	protein_coding	exon	-1.83937	6.38898e-06	0.000189023	TRUE
RDN25-2	RDN25-2	rRNA	exon	-2.27494	6.41414e-06	0.00295831	TRUE
YDR516C	EMI2	protein_coding	exon	-3.33404	6.44789e-06	0.000333819	TRUE
YJR110W	YMR1	protein_coding	3UTR	-4.60853	6.52158e-06	0.000868581	TRUE
YJL054W	TIM54	protein_coding	5UTR	-3.8155	6.56858e-06	0.000762293	TRUE
YBR248C	HIS7	protein_coding	3UTR	-2.25764	6.61891e-06	0.000544914	TRUE
YMR300C	ADE4	protein_coding	3UTR	-3.37474	6.619e-06	0.000472967	TRUE
YDR234W	LYS4	protein_coding	exon	4.25345	6.63689e-06	0.000395046	TRUE
YBL022C	PIM1	protein_coding	exon	2.54109	6.72372e-06	0.000378853	TRUE
YPR036W	VMA13	protein_coding	3UTR	-3.33048	6.72754e-06	0.000355257	TRUE
YCL055W	KAR4	protein_coding	exon	8.48665	6.74672e-06	0.000622246	TRUE
YPR160W	GPH1	protein_coding	5UTR	-3.75494	6.75546e-06	0.000380803	TRUE
YIL139C	REV7	protein_coding	5UTR	-4.54011	6.82535e-06	0.000618349	TRUE
YPR149W	NCE102	protein_coding	3UTR	-8.36657	6.83001e-06	0.000918428	TRUE
YHR025W	THR1	protein_coding	exon	-1.68169	6.91729e-06	0.000351578	TRUE
YPL043W	NOP4	protein_coding	exon	-2.8792	6.98153e-06	0.000390297	TRUE
YGL054C	ERV14	protein_coding	3UTR	-8.36807	7.09224e-06	0.000912901	TRUE
YEL007W	MIT1	protein_coding	exon	-2.43961	7.11488e-06	0.000506414	TRUE
YDL047W	SIT4	protein_coding	3UTR	-3.81388	7.13823e-06	0.000708083	TRUE
YDR225W	HTA1	protein_coding	exon	-1.31758	7.38415e-06	0.000215818	TRUE
YGL191W	COX13	protein_coding	3UTR	-3.43848	7.38998e-06	0.00102486	TRUE
YCR031C	RPS14A	protein_coding	exon	-1.08039	7.43191e-06	0.00021696	TRUE
YCL034W	LSB5	protein_coding	exon	2.0896	7.43296e-06	0.000404729	TRUE
YHR092C	HXT4	protein_coding	exon	-8.38168	7.46513e-06	0.000736728	TRUE
YOR132W	VPS17	protein_coding	exon	-2.95958	7.48532e-06	0.000624974	TRUE
YKR014C	YPT52	protein_coding	3UTR	-4.53682	7.60147e-06	0.000857146	TRUE
YLR439W	MRPL4	protein_coding	exon	-2.40337	7.71318e-06	0.00110948	TRUE
YHR183W	GND1	protein_coding	3UTR	-1.78628	7.73881e-06	0.000259428	TRUE
YDR071C	PAA1	protein_coding	exon	-1.27191	7.76507e-06	0.000232483	TRUE
YGR106C	VOA1	protein_coding	3UTR	-2.72479	7.78397e-06	0.000424781	TRUE
YOL109W	ZEO1	protein_coding	3UTR	-8.26042	7.82571e-06	0.000701366	TRUE
YLR058C	SHM2	protein_coding	3UTR	-1.92673	7.83693e-06	0.000653748	TRUE
YGR180C	RNR4	protein_coding	exon	-1.5259	7.91709e-06	0.000223396	TRUE
YGR129W	SYF2	protein_coding	3UTR	-8.36508	7.94834e-06	0.00395577	TRUE
YNR040W	YNR040W	protein_coding	exon	-3.14129	7.94939e-06	0.00066425	TRUE
YPR106W	ISR1	protein_coding	3UTR	-3.80674	7.96116e-06	0.00120296	TRUE
YPL105C	SYH1	protein_coding	3UTR	-4.61247	8.00754e-06	0.00100888	TRUE
YGR027C	RPS25A	protein_coding	exon	-1.07202	8.07259e-06	0.000212727	TRUE
YBR111C	YSA1	protein_coding	3UTR	-2.33868	8.151e-06	0.00045016	TRUE
YHR108W	GGA2	protein_coding	exon	-2.07586	8.16793e-06	0.000445099	TRUE
YCL057W	PRD1	protein_coding	3UTR	-2.18781	8.23423e-06	0.000419051	TRUE
YKL153W	YKL153W	protein_coding	exon	1.05066	8.23681e-06	0.000243765	TRUE
YDL214C	PRR2	protein_coding	5UTR	-8.36356	8.29385e-06	0.00399204	TRUE
YGR248W	SOL4	protein_coding	exon	-8.37408	8.30191e-06	0.00364786	TRUE
YBR104W	YMC2	protein_coding	3UTR	-4.53832	8.34565e-06	0.000731589	TRUE
YGR284C	ERV29	protein_coding	exon	-2.74666	8.42209e-06	0.000813855	TRUE
YGR055W	MUP1	protein_coding	3UTR	-2.88586	8.46195e-06	0.000584385	TRUE
YPR144C	NOC4	protein_coding	5UTR	1.43613	8.51639e-06	0.000242732	TRUE
YCR015C	CTO1	protein_coding	5UTR	-8.25887	8.5307e-06	0.00130867	TRUE
YOR326W	MYO2	protein_coding	3UTR	-3.36694	8.6124e-06	0.000814821	TRUE
YJL217W	REE1	protein_coding	exon	-3.09252	8.71033e-06	0.000835349	TRUE
YKL115C	YKL115C	protein_coding	exon	-2.29073	8.73768e-06	0.000837598	TRUE
YNL290W	RFC3	protein_coding	3UTR	-2.77939	8.74558e-06	0.00133484	TRUE
YER038C	KRE29	protein_coding	3UTR	-4.6226	8.80051e-06	0.00418484	TRUE
YBR084W	MIS1	protein_coding	exon	2.11353	8.80905e-06	0.000289967	TRUE
YDL150W	RPC53	protein_coding	exon	-2.60915	8.83506e-06	0.000721093	TRUE
YNL109W	YNL109W	protein_coding	exon	-2.48492	8.90433e-06	0.000470634	TRUE
YFR017C	IGD1	protein_coding	exon	-2.79075	9.03054e-06	0.00122931	TRUE
YKL198C	PTK1	protein_coding	3UTR	-4.61534	9.04718e-06	0.0043782	TRUE
YIR036C	IRC24	protein_coding	exon	8.4465	9.05358e-06	0.000792644	TRUE
YCR011C	ADP1	protein_coding	3UTR	-2.61385	9.05616e-06	0.00071104	TRUE
YEL034C-A	YEL034C-A	protein_coding	exon	-1.07402	9.06196e-06	0.000255584	TRUE
YIL147C	SLN1	protein_coding	3UTR	-2.41818	9.11167e-06	0.000617623	TRUE
YIL149C	MLP2	protein_coding	exon	-2.93356	9.12502e-06	0.000736728	TRUE
YDL124W	YDL124W	protein_coding	3UTR	-2.69391	9.1262e-06	0.000479951	TRUE
YDR151C	CTH1	protein_coding	3UTR	-4.5343	9.24002e-06	0.00139674	TRUE
YPL079W	RPL21B	protein_coding	3UTR	-3.31987	9.29372e-06	0.000502966	TRUE
YGR037C	ACB1	protein_coding	5UTR	-4.5312	9.31215e-06	0.00101345	TRUE
YDR395W	SXM1	protein_coding	exon	-2.8264	9.32043e-06	0.00046395	TRUE
YJR065C	ARP3	protein_coding	3UTR	-2.57824	9.32462e-06	0.00050041	TRUE
YGR167W	CLC1	protein_coding	3UTR	-8.36802	9.32573e-06	0.0224179	FALSE
YPR068C	HOS1	protein_coding	5UTR	-4.45056	9.40489e-06	0.00064014	TRUE
YOL094C	RFC4	protein_coding	3UTR	-8.36954	9.43132e-06	0.0107309	FALSE
YCR011C	ADP1	protein_coding	exon	-2.61391	9.597e-06	0.000568373	TRUE
YDL231C	BRE4	protein_coding	3UTR	-8.26367	9.66483e-06	0.00133484	TRUE
YFL034C-A	RPL22B	protein_coding	exon	-1.82216	9.68041e-06	0.000313255	TRUE
YGR276C	RNH70	protein_coding	3UTR	-2.27485	9.71315e-06	0.000780127	TRUE
YER073W	ALD5	protein_coding	3UTR	-8.26367	9.78065e-06	0.00130839	TRUE
YKL094W	YJU3	protein_coding	exon	-1.91113	9.79384e-06	0.000520787	TRUE
YDR454C	GUK1	protein_coding	3UTR	-2.13379	9.87613e-06	0.000516712	TRUE
YGR286C	BIO2	protein_coding	exon	-1.76076	9.88144e-06	0.000519428	TRUE
YHR190W	ERG9	protein_coding	3UTR	-3.10585	9.93609e-06	0.00150983	TRUE
YOR198C	BFR1	protein_coding	5UTR	-8.3665	9.96595e-06	0.0136271	FALSE
YKL204W	EAP1	protein_coding	3UTR	-8.36954	1.00553e-05	0.0392505	FALSE
YNR001C	CIT1	protein_coding	3UTR	-8.15659	1.01053e-05	0.000805235	TRUE
YBL074C	AAR2	protein_coding	5UTR	1.31269	1.03646e-05	0.000317103	TRUE
YBR078W	ECM33	protein_coding	exon	3.46542	1.03948e-05	0.000540722	TRUE
YDL134C	PPH21	protein_coding	5UTR	-2.78681	1.0428e-05	0.000339344	TRUE
YGR247W	CPD1	protein_coding	3UTR	-8.36499	1.0489e-05	0.0660938	FALSE
YGR020C	VMA7	protein_coding	3UTR	-1.53606	1.05028e-05	0.000501155	TRUE
YIL053W	YIL053W	protein_coding	3UTR	-2.77156	1.05517e-05	0.000370116	TRUE
YDR382W	RPP2B	protein_coding	3UTR	-2.96506	1.06026e-05	0.000344011	TRUE
YFL037W	TUB2	protein_coding	3UTR	-3.03684	1.06061e-05	0.000550004	TRUE
YLR388W	RPS29A	protein_coding	exon	-1.42484	1.06216e-05	0.00029093	TRUE
YDR433W	YDR433W	protein_coding	5UTR	-1.94736	1.06565e-05	0.000508088	TRUE
YHR005C-A	TIM10	protein_coding	3UTR	-1.73775	1.07125e-05	0.000341851	TRUE
YMR230W	RPS10B	protein_coding	3UTR	-2.22688	1.07229e-05	0.000547378	TRUE
YLL024C	SSA2	protein_coding	exon	8.51433	1.07373e-05	0.00140036	TRUE
YDR060W	MAK21	protein_coding	3UTR	-2.35839	1.07409e-05	0.000510112	TRUE
YPL092W	SSU1	protein_coding	exon	-8.25902	1.08017e-05	0.00142855	TRUE
YGL010W	MPO1	protein_coding	3UTR	-2.74333	1.0814e-05	0.000916992	TRUE
YPL232W	SSO1	protein_coding	3UTR	-2.79284	1.08734e-05	0.00137143	TRUE
YLL039C	UBI4	protein_coding	exon	-1.94491	1.08999e-05	0.000300548	TRUE
tT(AGU)I1	tT(AGU)I1	tRNA	exon	-4.61965	0.232152	1	FALSE
YAL007C	ERP2	protein_coding	3UTR	-3.74095	1.09501e-05	0.000706895	TRUE
YPR180W	AOS1	protein_coding	3UTR	-3.08683	1.11384e-05	0.000970117	TRUE
snR73	snR73	snoRNA	exon	1.24351	1.12216e-05	0.000305707	TRUE
YOR234C	RPL33B	protein_coding	3UTR	1.2597	1.12469e-05	0.000298564	TRUE
YPL081W	RPS9A	protein_coding	3UTR	-2.13166	1.12784e-05	0.000388421	TRUE
YGL144C	ROG1	protein_coding	3UTR	-3.80116	1.1291e-05	0.00145933	TRUE
YPR029C	APL4	protein_coding	3UTR	-2.15783	1.13933e-05	0.000451526	TRUE
YGL209W	MIG2	protein_coding	3UTR	-2.62402	1.13978e-05	0.00120488	TRUE
YER113C	TMN3	protein_coding	3UTR	-8.2606	1.14041e-05	0.000842512	TRUE
YHR079C	IRE1	protein_coding	3UTR	-3.0971	1.14053e-05	0.00104046	TRUE
YIL018W	RPL2B	protein_coding	exon	1.66534	1.1421e-05	0.000302351	TRUE
YLR100W	ERG27	protein_coding	exon	-1.4773	1.14252e-05	0.000357948	TRUE
YJR148W	BAT2	protein_coding	exon	-1.47629	1.15097e-05	0.000315295	TRUE
YOR133W	EFT1	protein_coding	exon	2.83036	1.1555e-05	0.00062584	TRUE
YCR082W	AHC2	protein_coding	5UTR	2.61123	1.16126e-05	0.00055569	TRUE
YOR368W	RAD17	protein_coding	exon	-3.22349	1.16478e-05	0.000460334	TRUE
YIL118W	RHO3	protein_coding	3UTR	-1.58588	1.17631e-05	0.000548777	TRUE
YAL037C-B	YAL037C-B	protein_coding	3UTR	1.04397	1.18138e-05	0.000322401	TRUE
YDL158C	YDL158C	protein_coding	5UTR	-2.64369	1.18218e-05	0.000546335	TRUE
YJR102C	VPS25	protein_coding	3UTR	-4.53667	1.18676e-05	0.00271051	TRUE
YHR049W	FSH1	protein_coding	3UTR	-2.84753	1.20674e-05	0.000649893	TRUE
YGL078C	DBP3	protein_coding	3UTR	-2.57022	1.21011e-05	0.000613202	TRUE
YGL140C	YGL140C	protein_coding	3UTR	-8.26215	1.22667e-05	0.00147872	TRUE
YJL189W	RPL39	protein_coding	3UTR	-2.61367	1.22693e-05	0.000388826	TRUE
YCL007C	YCL007C	protein_coding	5UTR	-1.38122	1.23451e-05	0.000420673	TRUE
YIL044C	AGE2	protein_coding	3UTR	-4.44708	1.2348e-05	0.00102404	TRUE
YMR039C	SUB1	protein_coding	3UTR	-8.2667	1.27204e-05	0.00339038	TRUE
YBR171W	SEC66	protein_coding	exon	-1.59854	1.2726e-05	0.000602946	TRUE
YKL130C	SHE2	protein_coding	3UTR	-4.54106	1.279e-05	0.0021696	TRUE
YLR192C	HCR1	protein_coding	3UTR	-3.66596	1.27988e-05	0.000637426	TRUE
YDR015C	YDR015C	protein_coding	5UTR	-3.37655	1.28701e-05	0.00162523	TRUE
YPL131W	RPL5	protein_coding	exon	-1.02537	1.28785e-05	0.000347791	TRUE
YDR091C	RLI1	protein_coding	3UTR	-2.39716	1.29403e-05	0.0010661	TRUE
YLL045C	RPL8B	protein_coding	exon	1.07659	1.31884e-05	0.000320175	TRUE
YJR145C	RPS4A	protein_coding	3UTR	-3.31015	1.32076e-05	0.00118177	TRUE
YHR204W	MNL1	protein_coding	exon	-4.53665	1.3225e-05	0.00160566	TRUE
YJL003W	COX16	protein_coding	3UTR	-3.66298	1.33898e-05	0.000670276	TRUE
YFL034C-A	RPL22B	protein_coding	3UTR	-1.75191	1.34492e-05	0.000450769	TRUE
YNL109W	YNL109W	protein_coding	5UTR	-8.14766	1.35125e-05	0.00101883	TRUE
YNL197C	WHI3	protein_coding	3UTR	-8.26067	1.36162e-05	0.00336795	TRUE
YOR361C	PRT1	protein_coding	3UTR	-3.02538	1.36696e-05	0.000869581	TRUE
YCL040W	GLK1	protein_coding	exon	-1.79266	1.3697e-05	0.000526592	TRUE
YKL007W	CAP1	protein_coding	3UTR	-3.31338	1.41334e-05	0.00105886	TRUE
YKL047W	ANR2	protein_coding	3UTR	-3.31177	1.414e-05	0.00123318	TRUE
YDL046W	NPC2	protein_coding	3UTR	-2.94448	1.43242e-05	0.00452191	TRUE
YBR221C	PDB1	protein_coding	3UTR	-4.36408	1.44633e-05	0.000711693	TRUE
YNL306W	MRPS18	protein_coding	exon	-1.92225	1.4551e-05	0.000717855	TRUE
YOR258W	HNT3	protein_coding	exon	-3.01765	1.46074e-05	0.000917682	TRUE
YJR049C	UTR1	protein_coding	3UTR	-3.09944	1.46519e-05	0.00180426	TRUE
YKL094W	YJU3	protein_coding	3UTR	-2.47255	1.48683e-05	0.00130332	TRUE
YDL145C	COP1	protein_coding	3UTR	-2.3054	1.49653e-05	0.000450639	TRUE
YPL099C	YPL099C	protein_coding	5UTR	-2.70949	1.50746e-05	0.000916823	TRUE
YLR220W	CCC1	protein_coding	3UTR	-3.03351	1.51097e-05	0.00108302	TRUE
YBL001C	ECM15	protein_coding	3UTR	-2.2573	1.51305e-05	0.000732248	TRUE
YMR079W	SEC14	protein_coding	3UTR	-3.73913	1.51347e-05	0.00131482	TRUE
YER056C	FCY2	protein_coding	3UTR	-8.15103	1.5145e-05	0.00151599	TRUE
YHR021C	RPS27B	protein_coding	exon	-1.07091	1.51617e-05	0.000407363	TRUE
YNL291C	MID1	protein_coding	3UTR	-3.72743	1.52052e-05	0.00151963	TRUE
YCR051W	YCR051W	protein_coding	3UTR	-1.95728	1.52385e-05	0.000942755	TRUE
YPR137W	RRP9	protein_coding	3UTR	-3.14821	1.53181e-05	0.00637601	TRUE
YDR276C	PMP3	protein_coding	3UTR	-2.05085	1.5378e-05	0.000932219	TRUE
YOR275C	RIM20	protein_coding	3UTR	-2.73636	1.5469e-05	0.00196314	TRUE
YGL253W	HXK2	protein_coding	3UTR	-1.94514	1.54765e-05	0.000398794	TRUE
YPL249C-A	RPL36B	protein_coding	3UTR	-3.37376	1.55729e-05	0.00179679	TRUE
YDL193W	NUS1	protein_coding	exon	-4.4471	1.56128e-05	0.00155304	TRUE
YLR440C	SEC39	protein_coding	5UTR	-3.24884	1.56263e-05	0.000759937	TRUE
YCL010C	SGF29	protein_coding	5UTR	-1.49669	1.56363e-05	0.000508461	TRUE
YPR183W	DPM1	protein_coding	3UTR	-4.5344	1.56993e-05	0.00178847	TRUE
YOL012C	HTZ1	protein_coding	3UTR	-2.14165	1.57453e-05	0.00125977	TRUE
YKR083C	DAD2	protein_coding	3UTR	-2.84675	1.60209e-05	0.00136089	TRUE
YIL090W	ICE2	protein_coding	3UTR	-8.26066	1.60654e-05	0.00689118	TRUE
YDR215C	YDR215C	protein_coding	3UTR	2.17232	1.60745e-05	0.000786185	TRUE
YBL087C	RPL23A	protein_coding	exon	1.21187	1.60989e-05	0.000458008	TRUE
YJL191W	RPS14B	protein_coding	3UTR	-8.14935	1.61267e-05	0.00138637	TRUE
YDR418W	RPL12B	protein_coding	exon	-1.30091	1.61726e-05	0.000419799	TRUE
YNL039W	BDP1	protein_coding	exon	-2.4797	1.62659e-05	0.00133173	TRUE
YCR084C	TUP1	protein_coding	3UTR	-2.11426	1.62913e-05	0.0010049	TRUE
YDR237W	MRPL7	protein_coding	3UTR	-2.90672	1.66193e-05	0.00187274	TRUE
YDR527W	RBA50	protein_coding	3UTR	1.38196	1.66298e-05	0.000425755	TRUE
YHR147C	MRPL6	protein_coding	exon	-2.6829	1.67293e-05	0.00143234	TRUE
YJL174W	KRE9	protein_coding	exon	-2.37559	1.69663e-05	0.0013341	TRUE
YDL209C	CWC2	protein_coding	3UTR	-8.26367	1.70814e-05	0.00684616	TRUE
YBR079C	RPG1	protein_coding	exon	2.10239	1.71103e-05	0.000504389	TRUE
YDR508C	GNP1	protein_coding	3UTR	-3.74205	1.7143e-05	0.0021136	TRUE
YFL034C-B	MOB2	protein_coding	5UTR	-1.75965	1.73774e-05	0.000656435	TRUE
YLR293C	GSP1	protein_coding	3UTR	-4.44711	1.74236e-05	0.00170027	TRUE
YPL143W	RPL33A	protein_coding	exon	-1.0861	1.75735e-05	0.000445577	TRUE
YHR147C	MRPL6	protein_coding	3UTR	-3.03229	1.7592e-05	0.00123382	TRUE
YDL092W	SRP14	protein_coding	3UTR	-2.35351	1.76253e-05	0.000841075	TRUE
YKR080W	MTD1	protein_coding	exon	-3.24534	1.76264e-05	0.000841075	TRUE
YNL181W	PBR1	protein_coding	exon	-2.19619	1.76595e-05	0.000837185	TRUE
YOL052C-A	DDR2	protein_coding	3UTR	-2.86068	1.7755e-05	0.00128488	TRUE
YPL068C	YPL068C	protein_coding	3UTR	-2.88962	1.77939e-05	0.00191612	TRUE
YBR261C	TAE1	protein_coding	exon	2.44922	1.78771e-05	0.000849441	TRUE
YDR389W	SAC7	protein_coding	3UTR	-3.72922	1.79049e-05	0.00213785	TRUE
YGR218W	CRM1	protein_coding	exon	-2.00341	1.7939e-05	0.000899341	TRUE
YAR015W	ADE1	protein_coding	exon	-2.26892	1.80868e-05	0.000871686	TRUE
YKL168C	KKQ8	protein_coding	3UTR	-8.14772	1.81311e-05	0.001522	TRUE
YPL240C	HSP82	protein_coding	exon	8.20091	1.81347e-05	0.000782643	TRUE
YMR192W	GYL1	protein_coding	exon	-8.26521	1.82182e-05	0.0223479	FALSE
YCR088W	ABP1	protein_coding	3UTR	-3.3803	1.82478e-05	0.00743291	TRUE
YBR265W	TSC10	protein_coding	5UTR	8.36286	1.84948e-05	0.00142967	TRUE
YER056C-A	RPL34A	protein_coding	3UTR	-1.90143	1.87528e-05	0.000594711	TRUE
YBR029C	CDS1	protein_coding	3UTR	-4.44866	1.87833e-05	0.00139747	TRUE
YDL173W	PAR32	protein_coding	exon	-1.96996	1.87926e-05	0.00088405	TRUE
YBR109C	CMD1	protein_coding	exon	1.75961	1.88501e-05	0.000461605	TRUE
YGR102C	GTF1	protein_coding	3UTR	-2.69325	1.8947e-05	0.00182548	TRUE
YHR174W	ENO2	protein_coding	exon	0.996302	1.9234e-05	0.000439589	FALSE
YJR059W	PTK2	protein_coding	3UTR	-4.45934	1.94196e-05	0.00228602	TRUE
YHR025W	THR1	protein_coding	3UTR	-2.5404	1.95269e-05	0.00117276	TRUE
YCL064C	CHA1	protein_coding	5UTR	4.25124	1.96323e-05	0.00215116	TRUE
YNL209W	SSB2	protein_coding	exon	2.48866	1.97885e-05	0.00265512	TRUE
YLR299C-A	YLR299C-A	protein_coding	5UTR	-3.74195	1.98073e-05	0.0021776	TRUE
YDR411C	DFM1	protein_coding	3UTR	-2.89476	1.98391e-05	0.00222281	TRUE
YDR016C	DAD1	protein_coding	3UTR	-2.89476	2.00207e-05	0.00456806	TRUE
YBR189W	RPS9B	protein_coding	exon	-1.03248	2.0156e-05	0.000503894	TRUE
YBR175W	SWD3	protein_coding	exon	4.23625	2.01664e-05	0.0023569	TRUE
YLR405W	DUS4	protein_coding	exon	-2.10675	2.01745e-05	0.000741676	TRUE
YPL083C	SEN54	protein_coding	3UTR	-8.15091	2.01758e-05	0.00237436	TRUE
YJL033W	HCA4	protein_coding	exon	-3.72492	2.02364e-05	0.00234634	TRUE
YOL089C	HAL9	protein_coding	5UTR	-4.53667	2.02526e-05	0.0396248	FALSE
YOL049W	GSH2	protein_coding	exon	-2.09996	2.05294e-05	0.000946952	TRUE
YLL024C	SSA2	protein_coding	3UTR	-1.01777	2.06735e-05	0.000514413	TRUE
YPL026C	SKS1	protein_coding	3UTR	-8.15248	2.08427e-05	0.00242275	TRUE
YNR037C	RSM19	protein_coding	3UTR	-8.14616	2.08737e-05	0.0024209	TRUE
YDR201W	SPC19	protein_coding	exon	-4.45319	2.09168e-05	0.002516	TRUE
YOL103W-A	YOL103W-A	transposable_element	exon	2.35107	2.10749e-05	0.00147227	TRUE
tD(GUC)I2	tD(GUC)I2	tRNA	exon	-4.61965	0.232137	1	FALSE
YJR003C	MRX12	protein_coding	3UTR	-3.64492	2.11394e-05	0.00142855	TRUE
YER003C	PMI40	protein_coding	3UTR	-2.31012	2.12482e-05	0.000963753	TRUE
YAL003W	EFB1	protein_coding	exon	3.38869	2.14499e-05	0.000980905	TRUE
YDR377W	ATP17	protein_coding	3UTR	-3.57265	2.166e-05	0.000979074	TRUE
YBL041W	PRE7	protein_coding	exon	3.35137	2.16902e-05	0.000934242	TRUE
YGR286C	BIO2	protein_coding	3UTR	-3.05037	2.19946e-05	0.00254244	TRUE
YPR010C	RPA135	protein_coding	3UTR	-2.49283	2.21e-05	0.000947769	TRUE
YDL128W	VCX1	protein_coding	3UTR	-8.14932	2.21907e-05	0.00252443	TRUE
YPL234C	VMA11	protein_coding	3UTR	-2.85281	2.22768e-05	0.00255626	TRUE
YOR187W	TUF1	protein_coding	exon	-2.29753	2.232e-05	0.00100595	TRUE
YKL063C	YKL063C	protein_coding	3UTR	-2.65507	2.24689e-05	0.00115622	TRUE
YBR162C	TOS1	protein_coding	3UTR	-4.3417	2.25154e-05	0.0013059	TRUE
snR40	snR40	snoRNA	exon	0.988469	2.26628e-05	0.000553544	FALSE
YCR046C	IMG1	protein_coding	5UTR	-3.73613	2.28481e-05	0.00239846	TRUE
YLR101C	YLR101C	protein_coding	exon	-2.9845	2.295e-05	0.00157994	TRUE
YMR230W	RPS10B	protein_coding	exon	-1.10408	2.29529e-05	0.000508461	TRUE
YDR023W	SES1	protein_coding	3UTR	-4.44863	2.30388e-05	0.00150799	TRUE
YNR040W	YNR040W	protein_coding	3UTR	-2.82353	2.304e-05	0.00300824	TRUE
YOR157C	PUP1	protein_coding	3UTR	-2.03234	2.30705e-05	0.00082832	TRUE
YMR192W	GYL1	protein_coding	3UTR	-8.26529	2.3256e-05	1	FALSE
YHL016C	DUR3	protein_coding	3UTR	-4.45162	2.32974e-05	0.004659	TRUE
YOR193W	PEX27	protein_coding	3UTR	-2.76053	2.33849e-05	0.00108053	TRUE
YJL185C	ATG36	protein_coding	3UTR	-2.33267	2.34616e-05	0.00106713	TRUE
YKL006C-A	SFT1	protein_coding	3UTR	-3.25163	2.35755e-05	0.00174662	TRUE
YLR249W	YEF3	protein_coding	exon	-0.981426	2.3663e-05	0.000588182	FALSE
YHR195W	NVJ1	protein_coding	exon	-8.15551	2.37451e-05	0.00472706	TRUE
YDR077W	SED1	protein_coding	exon	-0.993512	2.38342e-05	0.000591867	FALSE
YLR196W	PWP1	protein_coding	exon	-1.19564	2.41188e-05	0.000684072	TRUE
YJL208C	NUC1	protein_coding	3UTR	-8.14467	2.42378e-05	0.00273079	TRUE
YNL305C	BXI1	protein_coding	5UTR	-3.21273	2.42521e-05	0.00111493	TRUE
YOL011W	PLB3	protein_coding	3UTR	-3.04588	2.47335e-05	0.00282304	TRUE
YDR182W	CDC1	protein_coding	3UTR	-2.41695	2.47694e-05	0.00182151	TRUE
YHR162W	MPC2	protein_coding	3UTR	-2.9093	2.48702e-05	0.000879557	TRUE
YMR092C	AIP1	protein_coding	exon	-2.50965	2.48935e-05	0.00141727	TRUE
YML069W	POB3	protein_coding	exon	-2.33883	2.49777e-05	0.00169099	TRUE
YBR181C	RPS6B	protein_coding	3UTR	-2.9158	2.49893e-05	0.00105185	TRUE
YHL027W	RIM101	protein_coding	3UTR	-4.4501	2.51134e-05	0.00258687	TRUE
YDR150W	NUM1	protein_coding	exon	-3.66272	2.512e-05	0.001861	TRUE
YDL147W	RPN5	protein_coding	exon	-3.58277	2.52822e-05	0.00113551	TRUE
YGR049W	SCM4	protein_coding	3UTR	-8.14931	2.5427e-05	0.00268807	TRUE
YDL200C	MGT1	protein_coding	3UTR	-2.52037	2.54818e-05	0.00186452	TRUE
YNL115C	YNL115C	protein_coding	3UTR	-4.43741	2.55741e-05	0.00267731	TRUE
YBR194W	AIM4	protein_coding	3UTR	-3.58803	2.55925e-05	0.00113982	TRUE
YLR429W	CRN1	protein_coding	3UTR	-3.24066	2.56132e-05	0.00129103	TRUE
YJL026W	RNR2	protein_coding	5UTR	-1.41515	2.56776e-05	0.000718369	TRUE
YDR224C	HTB1	protein_coding	exon	-1.15761	2.56842e-05	0.000611201	TRUE
YDR462W	MRPL28	protein_coding	3UTR	-3.66363	2.58264e-05	0.00329525	TRUE
YKR052C	MRS4	protein_coding	3UTR	-3.31312	2.58847e-05	0.00264873	TRUE
YLR355C	ILV5	protein_coding	3UTR	-2.42181	2.59562e-05	0.000724326	TRUE
YLR168C	UPS2	protein_coding	5UTR	-2.19598	2.61808e-05	0.00130977	TRUE
YCL050C	APA1	protein_coding	exon	2.17047	2.62826e-05	0.00106277	TRUE
YGL112C	TAF6	protein_coding	3UTR	-3.74186	2.63794e-05	0.00566311	TRUE
YCR010C	ADY2	protein_coding	5UTR	-2.42604	2.65013e-05	0.00205869	TRUE
YDR071C	PAA1	protein_coding	3UTR	-1.29429	2.67176e-05	0.000638076	TRUE
YIL041W	GVP36	protein_coding	exon	2.37921	2.72676e-05	0.000948047	TRUE
YLR186W	EMG1	protein_coding	exon	-4.45154	2.75751e-05	0.00283968	TRUE
YNR044W	AGA1	protein_coding	exon	3.39577	2.76258e-05	0.00178099	TRUE
YMR246W	FAA4	protein_coding	3UTR	-1.62349	2.76664e-05	0.000942625	TRUE
YGL100W	SEH1	protein_coding	3UTR	-8.1493	2.77659e-05	0.00590669	TRUE
YBR003W	COQ1	protein_coding	5UTR	2.13135	2.78358e-05	0.0012314	TRUE
YJL028W	YJL028W	protein_coding	5UTR	-1.55241	2.80607e-05	0.00113584	TRUE
YLR380W	CSR1	protein_coding	exon	4.14263	2.81635e-05	0.00353943	TRUE
YEL042W	GDA1	protein_coding	3UTR	-2.31434	2.81743e-05	0.00124778	TRUE
YGL234W	ADE5%2C7	protein_coding	exon	-2.01704	2.82614e-05	0.000976165	TRUE
YDR074W	TPS2	protein_coding	exon	-2.59991	2.8538e-05	0.000983812	TRUE
YCR089W	FIG2	protein_coding	exon	4.19449	2.85938e-05	0.00282662	TRUE
YJL055W	YJL055W	protein_coding	exon	-2.38999	2.8758e-05	0.00133173	TRUE
YOR182C	RPS30B	protein_coding	3UTR	-2.42175	2.88666e-05	0.00203188	TRUE
YIL051C	MMF1	protein_coding	5UTR	-3.58332	2.90802e-05	0.0012805	TRUE
YHR107C	CDC12	protein_coding	3UTR	-3.23472	2.92248e-05	0.00186669	TRUE
YER062C	YER062C	protein_coding	3UTR	-4.35075	2.92397e-05	0.00210316	TRUE
YDR226W	ADK1	protein_coding	3UTR	-8.14778	2.9243e-05	0.00293505	TRUE
YPL190C	NAB3	protein_coding	exon	-1.05224	2.92843e-05	0.00069007	TRUE
YDR023W	SES1	protein_coding	exon	-1.78232	2.93565e-05	0.000861749	TRUE
YOL088C	MPD2	protein_coding	3UTR	-3.74047	2.93857e-05	0.00577855	TRUE
YNL166C	BNI5	protein_coding	3UTR	-3.66198	2.94105e-05	0.00261211	TRUE
YOR015W	YOR015W	protein_coding	exon	-3.03864	2.95018e-05	0.00299433	TRUE
YFL045C	SEC53	protein_coding	exon	-1.54027	2.96701e-05	0.000676824	TRUE
YBL101C	ECM21	protein_coding	3UTR	-2.97337	2.97047e-05	0.00195145	TRUE
YDR353W	TRR1	protein_coding	3UTR	-8.14778	2.98835e-05	0.0029318	TRUE
YFR017C	IGD1	protein_coding	5UTR	-2.83973	2.99015e-05	0.00298417	TRUE
YHR104W	GRE3	protein_coding	exon	-2.16982	2.99037e-05	0.00130332	TRUE
YJL186W	MNN5	protein_coding	exon	-1.74604	3.00506e-05	0.00123387	TRUE
YOR168W	GLN4	protein_coding	exon	1.7205	3.00886e-05	0.00100977	TRUE
YML086C	ALO1	protein_coding	5UTR	-4.43614	3.02026e-05	0.00295504	TRUE
YIL078W	THS1	protein_coding	exon	3.96296	3.03535e-05	0.000811793	TRUE
YAL021C	CCR4	protein_coding	3UTR	-4.44421	3.04096e-05	0.00300089	TRUE
YMR295C	YMR295C	protein_coding	3UTR	-3.66346	3.06303e-05	0.00164773	TRUE
YPL220W	RPL1A	protein_coding	exon	1.91384	3.07357e-05	0.000696235	TRUE
YOR197W	MCA1	protein_coding	exon	-3.17404	3.08279e-05	0.00133186	TRUE
YPL092W	SSU1	protein_coding	3UTR	-8.14173	3.08635e-05	0.00296349	TRUE
YPL218W	SAR1	protein_coding	3UTR	-2.39139	3.09614e-05	0.00133417	TRUE
YPL236C	ENV7	protein_coding	3UTR	-1.44532	3.10815e-05	0.000898479	TRUE
YGL195W	GCN1	protein_coding	exon	-1.16342	3.11223e-05	0.000701366	TRUE
YGR211W	ZPR1	protein_coding	3UTR	-2.34382	3.13316e-05	0.00239394	TRUE
YJR016C	ILV3	protein_coding	exon	2.50971	3.15139e-05	0.0013398	TRUE
YNL228W	YNL228W	protein_coding	5UTR	-2.41626	3.16038e-05	0.00389446	TRUE
YDL158C	YDL158C	protein_coding	exon	-8.02168	3.16641e-05	0.00219686	TRUE
YJL167W	ERG20	protein_coding	exon	2.5206	3.18777e-05	0.00135464	TRUE
YKR091W	SRL3	protein_coding	3UTR	-3.2344	3.19477e-05	0.00232245	TRUE
tA(UGC)E	tA(UGC)E	tRNA	exon	-4.61965	0.231718	1	FALSE
YHR010W	RPL27A	protein_coding	3UTR	-2.42972	3.22479e-05	0.00126531	TRUE
YDL190C	UFD2	protein_coding	3UTR	-3.57286	3.22663e-05	0.00138552	TRUE
YGL068W	MNP1	protein_coding	exon	-2.90062	3.23005e-05	0.00130332	TRUE
YOL086C	ADH1	protein_coding	exon	0.98782	3.23564e-05	0.000818363	FALSE
YER054C	GIP2	protein_coding	3UTR	-3.03957	3.24213e-05	0.00331236	TRUE
YJL034W	KAR2	protein_coding	3UTR	-3.17055	3.25767e-05	0.0013933	TRUE
YDL182W	LYS20	protein_coding	exon	-1.95294	3.26149e-05	0.00127656	TRUE
YAL037C-B	YAL037C-B	protein_coding	3UTR	0.993876	3.27145e-05	0.00068552	FALSE
YOR048C	RAT1	protein_coding	exon	8.33365	3.28005e-05	0.00350308	TRUE
YOR259C	RPT4	protein_coding	3UTR	-2.0575	3.28856e-05	0.00128504	TRUE
YOR198C	BFR1	protein_coding	3UTR	-4.34853	3.32094e-05	0.00404088	TRUE
YNL305C	BXI1	protein_coding	3UTR	-1.85926	3.34516e-05	0.00142917	TRUE
YBR234C	ARC40	protein_coding	exon	1.89801	3.35809e-05	0.0011319	TRUE
YGR128C	UTP8	protein_coding	3UTR	-2.59035	3.36829e-05	0.00151393	TRUE
YDR158W	HOM2	protein_coding	3UTR	-3.50208	3.37415e-05	0.00113573	TRUE
YBL027W	RPL19B	protein_coding	exon	1.2398	3.37538e-05	0.000790724	TRUE
YMR272C	SCS7	protein_coding	3UTR	-8.02676	3.3765e-05	0.0029318	TRUE
YEL040W	UTR2	protein_coding	exon	1.50498	3.37672e-05	0.0008781	TRUE
YPL224C	MMT2	protein_coding	3UTR	-8.0234	3.38091e-05	0.00293417	TRUE
YLR390W-A	CCW14	protein_coding	3UTR	-2.38517	3.38805e-05	0.00182672	TRUE
YCR012W	PGK1	protein_coding	exon	0.995225	3.39055e-05	0.000705697	FALSE
YDR223W	CRF1	protein_coding	3UTR	-7.88924	3.41626e-05	0.00143122	TRUE
YGR118W	RPS23A	protein_coding	exon	2.17218	3.42225e-05	0.0013341	TRUE
YPL220W	RPL1A	protein_coding	3UTR	-4.25658	3.42787e-05	0.00144693	TRUE
YNL284C	MRPL10	protein_coding	exon	-3.24218	3.44463e-05	0.00237709	TRUE
YKL028W	TFA1	protein_coding	exon	-1.26243	3.4803e-05	0.00135568	TRUE
YAL044C	GCV3	protein_coding	3UTR	-1.19609	3.48342e-05	0.000786239	TRUE
YLR198C	YLR198C	protein_coding	exon	-1.21829	3.49663e-05	0.000795559	TRUE
YLL018C	DPS1	protein_coding	exon	1.36139	3.49778e-05	0.000814821	TRUE
YKL153W	YKL153W	protein_coding	exon	0.968214	3.50622e-05	0.000816211	FALSE
YDL081C	RPP1A	protein_coding	exon	-0.990354	3.50928e-05	0.000873471	FALSE
YCR057C	PWP2	protein_coding	exon	8.33388	3.51383e-05	0.00334255	TRUE
YLR342W	FKS1	protein_coding	exon	-1.1821	3.52172e-05	0.000793091	TRUE
YLR106C	MDN1	protein_coding	exon	-1.29489	3.52966e-05	0.000997346	TRUE
YHR204W	MNL1	protein_coding	3UTR	-8.14777	3.53324e-05	0.00680287	TRUE
YPL045W	VPS16	protein_coding	3UTR	-8.14623	3.58838e-05	0.0123022	FALSE
YPL226W	NEW1	protein_coding	3UTR	-3.17219	3.59225e-05	0.00151065	TRUE
YJL148W	RPA34	protein_coding	exon	-1.22175	3.69181e-05	0.000945241	TRUE
YLL040C	VPS13	protein_coding	exon	-8.02669	3.6958e-05	0.00273356	TRUE
YDR429C	TIF35	protein_coding	exon	1.54504	3.71541e-05	0.00104908	TRUE
YDR353W	TRR1	protein_coding	3UTR	-8.14776	3.72426e-05	0.0376787	FALSE
YBL003C	HTA2	protein_coding	3UTR	-2.5101	3.729e-05	0.000958974	TRUE
YML085C	TUB1	protein_coding	3UTR	-3.22753	3.72985e-05	0.00253274	TRUE
YER038C	KRE29	protein_coding	3UTR	-8.14776	3.73873e-05	0.0377923	FALSE
YOL030W	GAS5	protein_coding	exon	-3.57125	3.74282e-05	0.00155551	TRUE
YHR104W	GRE3	protein_coding	3UTR	-8.02504	3.7628e-05	0.00277736	TRUE
YJR123W	RPS5	protein_coding	3UTR	-2.84831	3.77491e-05	0.00124992	TRUE
YDR356W	SPC110	protein_coding	3UTR	-4.35651	3.77543e-05	0.00195918	TRUE
YGR211W	ZPR1	protein_coding	exon	2.69017	3.77626e-05	0.00156478	TRUE
YNR053C	NOG2	protein_coding	exon	2.52225	3.77904e-05	0.00156563	TRUE
YKL060C	FBA1	protein_coding	exon	0.974519	3.78748e-05	0.000841183	FALSE
YKL139W	CTK1	protein_coding	exon	-3.2401	3.79029e-05	0.00243758	TRUE
YOR120W	GCY1	protein_coding	exon	-8.02177	3.79187e-05	0.00279641	TRUE
YOR208W	PTP2	protein_coding	3UTR	-8.02341	3.79476e-05	0.00254299	TRUE
YGL008C	PMA1	protein_coding	exon	1.1068	3.81149e-05	0.000846141	TRUE
YKR008W	RSC4	protein_coding	3UTR	-8.15087	3.81938e-05	0.0624524	FALSE
YIL093C	RSM25	protein_coding	3UTR	-2.97991	3.8679e-05	0.00200083	TRUE
YHR007C-A	YHR007C-A	protein_coding	exon	-3.23469	3.89619e-05	0.00329102	TRUE
YKL125W	RRN3	protein_coding	exon	8.3412	3.91363e-05	0.00390879	TRUE
YML010W	SPT5	protein_coding	exon	2.55805	3.91921e-05	0.00245015	TRUE
YKL126W	YPK1	protein_coding	exon	8.19283	3.92397e-05	0.00246123	TRUE
YOR220W	RCN2	protein_coding	3UTR	-3.02704	3.95514e-05	0.00782051	TRUE
YBR248C	HIS7	protein_coding	exon	-1.56126	3.95547e-05	0.00161002	TRUE
YLR170C	APS1	protein_coding	3UTR	-1.9992	3.95683e-05	0.00183991	TRUE
YDR206W	EBS1	protein_coding	3UTR	-8.02178	3.96177e-05	0.00456146	TRUE
YMR193C-A	YMR193C-A	protein_coding	5UTR	-1.21361	3.96986e-05	0.000855826	TRUE
YFR023W	PES4	protein_coding	exon	-8.14466	3.99139e-05	0.0382653	FALSE
YGR277C	CAB4	protein_coding	exon	-1.79286	3.99378e-05	0.00410201	TRUE
YML049C	RSE1	protein_coding	exon	-1.62765	4.00354e-05	0.00165486	TRUE
YDR500C	RPL37B	protein_coding	exon	-1.02009	4.0296e-05	0.000893663	TRUE
YLR321C	SFH1	protein_coding	3UTR	-2.20561	4.03308e-05	0.00165482	TRUE
YEL009C	GCN4	protein_coding	5UTR	-1.8415	4.05809e-05	0.00130014	TRUE
YJL062W-A	COA3	protein_coding	3UTR	-2.78375	4.06998e-05	0.00252483	TRUE
YKL123W	YKL123W	protein_coding	exon	-2.73008	4.09213e-05	0.00213639	TRUE
YDL097C	RPN6	protein_coding	exon	2.35008	4.12268e-05	0.00155114	TRUE
YDR167W	TAF10	protein_coding	3UTR	-8.02018	4.12379e-05	0.00257319	TRUE
YLR154C	RNH203	protein_coding	3UTR	-8.14467	4.13366e-05	0.100835	FALSE
YIL030W-A	YIL030W-A	protein_coding	exon	-8.14467	4.13489e-05	0.100358	FALSE
YAL060W	BDH1	protein_coding	3UTR	-8.0218	4.13511e-05	0.0042263	TRUE
YKL087C	CYT2	protein_coding	3UTR	-4.34803	4.13847e-05	0.00261483	TRUE
YBL057C	PTH2	protein_coding	3UTR	-1.26177	4.16662e-05	0.000888421	TRUE
YKL040C	NFU1	protein_coding	3UTR	-2.14319	4.18423e-05	0.00259233	TRUE
YDL130W	RPP1B	protein_coding	exon	0.992225	4.19158e-05	0.000838014	FALSE
YHR081W	LRP1	protein_coding	3UTR	-1.46483	4.22485e-05	0.00172786	TRUE
YGR109W-B	YGR109W-B	transposable_element	exon	3.03598	4.24003e-05	0.00406878	TRUE
YNL301C	RPL18B	protein_coding	3UTR	-8.14621	4.28054e-05	0.653955	FALSE
YAL025C	MAK16	protein_coding	3UTR	-3.65233	4.28379e-05	0.0042028	TRUE
YPL013C	MRPS16	protein_coding	3UTR	-4.358	4.29761e-05	0.00431201	TRUE
YLR299W	ECM38	protein_coding	exon	-2.96626	4.30913e-05	0.00270253	TRUE
YLR333C	RPS25B	protein_coding	3UTR	-3.65526	4.32643e-05	0.00575078	TRUE
YNL136W	EAF7	protein_coding	exon	-2.19205	4.34113e-05	0.00179912	TRUE
YML012W	ERV25	protein_coding	exon	-1.67147	4.35541e-05	0.00139987	TRUE
YHR175W	CTR2	protein_coding	5UTR	-2.62804	4.36203e-05	0.00439837	TRUE
YOR065W	CYT1	protein_coding	3UTR	-8.02341	4.37229e-05	0.00442748	TRUE
YDR333C	RQC1	protein_coding	3UTR	-8.02022	4.38734e-05	0.00440761	TRUE
YGR222W	PET54	protein_coding	5UTR	1.25357	4.46789e-05	0.000963178	TRUE
YER159C	BUR6	protein_coding	3UTR	-4.35647	4.48581e-05	0.00422769	TRUE
YOR293W	RPS10A	protein_coding	exon	-0.967144	4.4876e-05	0.000966593	FALSE
YGR263C	SAY1	protein_coding	5UTR	-4.25029	4.49285e-05	0.0023275	TRUE
YMR237W	BCH1	protein_coding	exon	-8.01864	4.55347e-05	0.00453953	TRUE
YMR044W	IOC4	protein_coding	3UTR	-3.59011	4.58842e-05	0.0037615	TRUE
YMR243C	ZRC1	protein_coding	3UTR	-8.01546	4.59423e-05	0.00457462	TRUE
YER066C-A	YER066C-A	protein_coding	exon	-4.26539	4.59513e-05	0.00185891	TRUE
YBR127C	VMA2	protein_coding	exon	1.42784	4.60493e-05	0.000905323	TRUE
YIL115W-A	YIL115W-A	protein_coding	exon	-1.74931	4.63305e-05	0.00174858	TRUE
YHR042W	NCP1	protein_coding	exon	-1.992	4.65664e-05	0.00185105	TRUE
YCL024W	KCC4	protein_coding	exon	8.2766	4.664e-05	0.00465054	TRUE
YDL067C	COX9	protein_coding	3UTR	-2.9132	4.69411e-05	0.00211869	TRUE
YGL242C	YGL242C	protein_coding	3UTR	-2.26917	4.71438e-05	0.0024179	TRUE
YCL054W	SPB1	protein_coding	exon	8.19315	4.71451e-05	0.0027583	TRUE
YCL056C	PEX34	protein_coding	3UTR	-1.76172	4.73484e-05	0.0017246	TRUE
YDR296W	MHR1	protein_coding	exon	-2.20254	4.74461e-05	0.00337447	TRUE
YGL030W	RPL30	protein_coding	3UTR	-2.26971	4.77489e-05	0.00129555	TRUE
YPL090C	RPS6A	protein_coding	exon	4.15124	4.78362e-05	0.0044214	TRUE
YLR186W	EMG1	protein_coding	3UTR	-3.6596	4.78409e-05	0.00432724	TRUE
YFR001W	LOC1	protein_coding	exon	-1.37846	4.80856e-05	0.00120987	TRUE
YOR085W	OST3	protein_coding	3UTR	-1.15532	4.8139e-05	0.00102068	TRUE
YJL191W	RPS14B	protein_coding	exon	1.52972	4.82568e-05	0.00129865	TRUE
YAL038W	CDC19	protein_coding	3UTR	-2.37074	4.83469e-05	0.00130031	TRUE
YOL120C	RPL18A	protein_coding	exon	2.61673	4.89728e-05	0.0017746	TRUE
YPL260W	CUB1	protein_coding	3UTR	-4.35345	4.91651e-05	0.00445098	TRUE
YCL040W	GLK1	protein_coding	3UTR	-4.2674	4.93996e-05	0.0019687	TRUE
YBR271W	EFM2	protein_coding	exon	8.29091	4.94876e-05	0.00453545	TRUE
YDR048C	YDR048C	protein_coding	3UTR	-3.58208	4.9518e-05	0.00324026	TRUE
YJL127C-B	YJL127C-B	protein_coding	exon	-8.02342	5.0233e-05	0.00444738	TRUE
YIL155C	GUT2	protein_coding	3UTR	-3.23751	5.02966e-05	0.00463762	TRUE
YMR091C	NPL6	protein_coding	3UTR	-8.02185	5.03494e-05	0.00490568	TRUE
YNL209W	SSB2	protein_coding	3UTR	-2.31048	5.08709e-05	0.00198726	TRUE
YLR033W	RSC58	protein_coding	exon	8.20122	5.12493e-05	0.00325011	TRUE
YAL038W	CDC19	protein_coding	exon	0.959647	5.1292e-05	0.00120229	FALSE
YHR193C	EGD2	protein_coding	3UTR	-1.42956	5.1368e-05	0.00105833	TRUE
YBR066C	NRG2	protein_coding	3UTR	-8.02498	5.14242e-05	0.00452635	TRUE
YDR099W	BMH2	protein_coding	3UTR	-3.17081	5.14804e-05	0.00305948	TRUE
YBR051W	YBR051W	protein_coding	5UTR	-2.15464	5.15171e-05	0.00186747	TRUE
YKL210W	UBA1	protein_coding	exon	-2.83811	5.16292e-05	0.00191909	TRUE
YIL077C	YIL077C	protein_coding	3UTR	-3.08709	5.17355e-05	0.00192124	TRUE
YDL037C	BSC1	protein_coding	exon	-3.23495	5.17971e-05	0.00486183	TRUE
YPL221W	FLC1	protein_coding	exon	-2.57052	5.18758e-05	0.00298417	TRUE
YCL005W-A	VMA9	protein_coding	3UTR	1.9664	5.18836e-05	0.00109371	TRUE
YDL045W-A	MRP10	protein_coding	3UTR	-3.56755	5.18901e-05	0.00571872	TRUE
YOR159C	SME1	protein_coding	3UTR	-8.02342	5.19099e-05	0.00455934	TRUE
YGL009C	LEU1	protein_coding	exon	2.1823	5.19399e-05	0.00138462	TRUE
YBR290W	BSD2	protein_coding	exon	-8.0203	5.21171e-05	0.00503928	TRUE
YDR190C	RVB1	protein_coding	3UTR	-8.02653	5.21662e-05	0.00471734	TRUE
YLL039C	UBI4	protein_coding	5UTR	-1.85802	5.21805e-05	0.00193487	TRUE
YGL038C	OCH1	protein_coding	exon	3.34596	5.25873e-05	0.00579876	TRUE
YGR204W	ADE3	protein_coding	exon	-1.63355	5.2886e-05	0.00129048	TRUE
YER110C	KAP123	protein_coding	exon	-1.42708	5.29439e-05	0.00108755	TRUE
YEL044W	IES6	protein_coding	exon	-3.17488	5.31865e-05	0.00342415	TRUE
YIL082W	YIL082W	protein_coding	exon	2.94747	5.35461e-05	0.00326118	TRUE
YJL143W	TIM17	protein_coding	3UTR	-8.02497	5.36802e-05	0.00475524	TRUE
YHL001W	RPL14B	protein_coding	3UTR	-2.19473	5.38384e-05	0.00166324	TRUE
YML085C	TUB1	protein_coding	exon	2.88797	5.38648e-05	0.0020864	TRUE
YOR191W	ULS1	protein_coding	exon	8.20125	5.39123e-05	0.00427751	TRUE
YGL028C	SCW11	protein_coding	exon	-1.64355	5.39222e-05	0.00193789	TRUE
YLR452C	SST2	protein_coding	3UTR	-8.01876	5.39949e-05	0.00491282	TRUE
YGL253W	HXK2	protein_coding	exon	2.81016	5.40933e-05	0.00110598	TRUE
YDR119W-A	COX26	protein_coding	exon	-3.58116	5.4374e-05	0.00430628	TRUE
YBR221C	PDB1	protein_coding	exon	1.45039	5.46003e-05	0.00143934	TRUE
YIL149C	MLP2	protein_coding	3UTR	-2.95257	5.49309e-05	0.00922507	TRUE
YGR270W	YTA7	protein_coding	exon	-2.89312	5.53856e-05	0.00351928	TRUE
YOR117W	RPT5	protein_coding	3UTR	-2.90075	5.54816e-05	0.0035235	TRUE
YLR168C	UPS2	protein_coding	3UTR	-1.55179	5.58252e-05	0.00117509	TRUE
YPR008W	HAA1	protein_coding	3UTR	-3.24148	5.59388e-05	0.00482606	TRUE
YLR017W	MEU1	protein_coding	exon	-3.57496	5.59609e-05	0.00341986	TRUE
YLR435W	TSR2	protein_coding	exon	4.01487	5.63031e-05	0.00329447	TRUE
YLR292C	SEC72	protein_coding	exon	2.91831	5.64407e-05	0.00220305	TRUE
YDR177W	UBC1	protein_coding	3UTR	-8.02342	5.65259e-05	0.00520207	TRUE
YLR058C	SHM2	protein_coding	5UTR	-1.7059	5.694e-05	0.00225335	TRUE
YOR247W	SRL1	protein_coding	3UTR	-1.78545	5.69567e-05	0.00202727	TRUE
YDL120W	YFH1	protein_coding	3UTR	-8.02802	5.69724e-05	0.00525454	TRUE
YDR210W	YDR210W	protein_coding	3UTR	-3.16756	5.79066e-05	0.00626625	TRUE
YGR103W	NOP7	protein_coding	exon	-1.16403	5.7925e-05	0.00120229	TRUE
YIL137C	TMA108	protein_coding	3UTR	-8.02036	5.79382e-05	0.00505182	TRUE
YML052W	SUR7	protein_coding	3UTR	-3.65227	5.80822e-05	0.0177624	FALSE
YLR286C	CTS1	protein_coding	5UTR	-1.13638	5.82707e-05	0.00121919	TRUE
YHR027C	RPN1	protein_coding	exon	2.26443	5.89453e-05	0.00142515	TRUE
YBR286W	APE3	protein_coding	exon	-1.62897	5.89554e-05	0.00153252	TRUE
YGR054W	YGR054W	protein_coding	exon	-1.90923	5.92056e-05	0.001802	TRUE
YMR120C	ADE17	protein_coding	3UTR	-8.02342	5.95026e-05	0.0107987	FALSE
YLR186W	EMG1	protein_coding	3UTR	-3.23416	5.98828e-05	0.0139604	FALSE
tW(CCA)G1	tW(CCA)G1	tRNA	exon	-4.61964	0.231495	1	FALSE
YBR025C	OLA1	protein_coding	3UTR	-1.24177	6.00245e-05	0.00123918	TRUE
YMR225C	MRPL44	protein_coding	5UTR	-2.56899	6.06803e-05	0.00467672	TRUE
YLL040C	VPS13	protein_coding	3UTR	-2.52617	6.09225e-05	0.00237862	TRUE
YOR043W	WHI2	protein_coding	exon	-2.08381	6.09264e-05	0.00232854	TRUE
snR64	snR64	snoRNA	exon	1.03592	6.0951e-05	0.00129481	TRUE
YOR221C	MCT1	protein_coding	3UTR	-2.77292	6.14429e-05	0.00512731	TRUE
YDL086W	YDL086W	protein_coding	exon	-1.88194	6.15995e-05	0.0022227	TRUE
YDR504C	SPG3	protein_coding	exon	-8.02037	6.19205e-05	0.00522434	TRUE
YOR365C	YOR365C	protein_coding	5UTR	-2.7257	6.2027e-05	0.00383522	TRUE
YNL110C	NOP15	protein_coding	3UTR	-3.5743	6.21246e-05	0.00294945	TRUE
YBR189W	RPS9B	protein_coding	3UTR	-1.47189	6.21697e-05	0.00116518	TRUE
YGR220C	MRPL9	protein_coding	3UTR	-2.24402	6.2266e-05	0.00419268	TRUE
YKL096W	CWP1	protein_coding	3UTR	-4.36242	6.27288e-05	0.0189465	FALSE
YIL022W	TIM44	protein_coding	3UTR	-3.58183	6.27577e-05	0.00597703	TRUE
YER049W	TPA1	protein_coding	exon	-1.42536	6.30349e-05	0.00237475	TRUE
YPL110C	GDE1	protein_coding	3UTR	-8.02648	6.31559e-05	0.0195313	FALSE
YER102W	RPS8B	protein_coding	3UTR	-3.48746	6.34337e-05	0.00241479	TRUE
YDR480W	DIG2	protein_coding	exon	-8.01884	6.36532e-05	0.00534364	TRUE
YNL082W	PMS1	protein_coding	exon	-2.92402	6.37413e-05	0.00363826	TRUE
YDL188C	PPH22	protein_coding	3UTR	-8.0219	6.42411e-05	0.0197855	FALSE
YBR247C	ENP1	protein_coding	3UTR	-2.72127	6.42522e-05	0.00390552	TRUE
YMR062C	ARG7	protein_coding	3UTR	-8.0219	6.43042e-05	0.0055738	TRUE
YKL033W-A	YKL033W-A	protein_coding	3UTR	-3.49441	6.44712e-05	0.00368849	TRUE
YPL068C	YPL068C	protein_coding	3UTR	-2.97154	6.45439e-05	0.0203492	FALSE
YDR494W	RSM28	protein_coding	exon	-1.51878	6.45705e-05	0.00258449	TRUE
YHR164C	DNA2	protein_coding	3UTR	-2.89776	6.51592e-05	0.00494279	TRUE
YGR012W	MCY1	protein_coding	exon	-4.25968	6.5162e-05	0.00432724	TRUE
YKL085W	MDH1	protein_coding	3UTR	-1.39955	6.63209e-05	0.00197687	TRUE
YDR399W	HPT1	protein_coding	3UTR	-2.10241	6.65465e-05	0.00281753	TRUE
YGR027C	RPS25A	protein_coding	exon	-0.960825	6.70286e-05	0.00135192	FALSE
YER053C	PIC2	protein_coding	3UTR	-3.09932	6.72457e-05	0.00253061	TRUE
YNL286W	CUS2	protein_coding	exon	-2.45904	6.73437e-05	0.00617189	TRUE
YAL044W-A	BOL1	protein_coding	3UTR	-1.0934	6.81461e-05	0.00136193	TRUE
YDR275W	BSC2	protein_coding	5UTR	3.38535	6.83392e-05	0.00597534	TRUE
YMR062C	ARG7	protein_coding	3UTR	-8.02189	6.86098e-05	0.0208252	FALSE
YDR044W	HEM13	protein_coding	3UTR	-8.02189	6.88396e-05	0.0121144	FALSE
YGR186W	TFG1	protein_coding	exon	-4.25962	6.90706e-05	0.00517243	TRUE
YDR409W	SIZ1	protein_coding	3UTR	-7.88552	6.90869e-05	0.00401004	TRUE
YNL130C	CPT1	protein_coding	3UTR	-2.36417	6.91113e-05	0.00237862	TRUE
YJL189W	RPL39	protein_coding	exon	0.976266	6.91849e-05	0.00153025	FALSE
YMR022W	UBC7	protein_coding	3UTR	-3.1621	6.94972e-05	0.00393679	TRUE
YJL052W	TDH1	protein_coding	exon	-7.7389	6.95719e-05	0.00244343	TRUE
YER159C	BUR6	protein_coding	3UTR	-8.02188	7.01589e-05	0.0157796	FALSE
YHR167W	THP2	protein_coding	exon	-8.02188	7.03e-05	0.0211983	FALSE
YJR058C	APS2	protein_coding	3UTR	-3.08715	7.04734e-05	0.002632	TRUE
YML073C	RPL6A	protein_coding	exon	-1.15163	7.04798e-05	0.00129457	TRUE
YKL082C	RRP14	protein_coding	exon	-7.88897	7.06224e-05	0.00408041	TRUE
YOR372C	NDD1	protein_coding	3UTR	-8.02497	7.07541e-05	0.020795	FALSE
YCL046W	YCL046W	protein_coding	5UTR	8.21587	7.08273e-05	0.00641366	TRUE
YER074W	RPS24A	protein_coding	exon	1.00663	7.11293e-05	0.00141944	TRUE
YDR074W	TPS2	protein_coding	3UTR	-7.88896	7.22734e-05	0.00535867	TRUE
YLR310C	CDC25	protein_coding	exon	3.98896	7.23299e-05	0.00403735	TRUE
YBR003W	COQ1	protein_coding	3UTR	-3.57061	7.25036e-05	0.00655446	TRUE
YBL077W	YBL077W	protein_coding	exon	-7.88725	7.25558e-05	0.00749815	TRUE
YJL039C	NUP192	protein_coding	3UTR	-2.63668	7.2607e-05	0.00268717	TRUE
YBR227C	MCX1	protein_coding	exon	8.20862	7.27592e-05	0.00655446	TRUE
YPR137W	RRP9	protein_coding	exon	-2.58018	7.29742e-05	0.00653989	TRUE
YDR446W	ECM11	protein_coding	3UTR	-1.2205	7.35473e-05	0.00145779	TRUE
YER102W	RPS8B	protein_coding	exon	3.29967	7.37724e-05	0.00439386	TRUE
YJL121C	RPE1	protein_coding	3UTR	-2.82826	7.38961e-05	0.0027379	TRUE
YJR009C	TDH2	protein_coding	exon	0.977872	7.39506e-05	0.00151065	FALSE
YKR001C	VPS1	protein_coding	exon	-1.83616	7.416e-05	0.00168095	TRUE
YHR039C-A	VMA10	protein_coding	3UTR	-2.59989	7.47221e-05	0.00253786	TRUE
YNL065W	AQR1	protein_coding	3UTR	-4.25799	7.47706e-05	0.00413965	TRUE
YJL166W	QCR8	protein_coding	exon	-2.21776	7.51157e-05	0.00186452	TRUE
YMR246W	FAA4	protein_coding	exon	1.91393	7.52997e-05	0.00170253	TRUE
YOR204W	DED1	protein_coding	exon	1.78543	7.53198e-05	0.00147872	TRUE
YIL123W	SIM1	protein_coding	exon	-1.78683	7.55792e-05	0.00255516	TRUE
YJL207C	LAA1	protein_coding	exon	-8.02186	7.59496e-05	0.0647389	FALSE
YKL191W	DPH2	protein_coding	3UTR	-2.57079	7.6843e-05	0.0069653	TRUE
YHR091C	MSR1	protein_coding	5UTR	-8.26896	7.7041e-05	0.0049385	TRUE
YBR091C	TIM12	protein_coding	5UTR	-8.0203	7.71069e-05	0.0630849	FALSE
YBL068W	PRS4	protein_coding	exon	-3.57068	7.72739e-05	0.00653511	TRUE
YER050C	RSM18	protein_coding	3UTR	-3.57658	7.73652e-05	0.00669242	TRUE
YLR286W-A	YLR286W-A	protein_coding	3UTR	-1.11225	7.74395e-05	0.00151963	TRUE
YNL143C	YNL143C	protein_coding	3UTR	-8.02342	7.75362e-05	0.051704	FALSE
YOL071W	YOL071W	protein_coding	3UTR	-8.02186	7.76099e-05	0.0629462	FALSE
YOR369C	RPS12	protein_coding	3UTR	-0.962403	7.76826e-05	0.00153591	FALSE
YDR296W	MHR1	protein_coding	3UTR	-2.32662	7.77881e-05	0.00568556	TRUE
YIL111W	COX5B	protein_coding	exon	-3.08888	7.77983e-05	0.00284154	TRUE
YIL031W	ULP2	protein_coding	exon	-8.01874	7.79074e-05	0.0635541	FALSE
YNL043C	YNL043C	protein_coding	3UTR	-8.02185	7.79861e-05	0.0995679	FALSE
YJL124C	LSM1	protein_coding	5UTR	-2.33342	7.81227e-05	0.00455125	TRUE
YPL057C	SUR1	protein_coding	3UTR	-8.02498	7.81512e-05	0.0637251	FALSE
YGR248W	SOL4	protein_coding	3UTR	-8.02655	7.83591e-05	0.0983637	FALSE
YDR260C	SWM1	protein_coding	5UTR	-3.15623	7.84099e-05	0.00714368	TRUE
YLR395C	COX8	protein_coding	3UTR	-3.49591	7.86302e-05	0.00418256	TRUE
YJL154C	VPS35	protein_coding	3UTR	-3.1727	7.87228e-05	0.00633389	TRUE
YER007C-A	TMA20	protein_coding	3UTR	-1.7928	7.9564e-05	0.00286762	TRUE
YAL035W	FUN12	protein_coding	3UTR	-1.84814	7.96539e-05	0.0023058	TRUE
YIL090W	ICE2	protein_coding	3UTR	-8.02185	7.9709e-05	0.100761	FALSE
YPR183W	DPM1	protein_coding	3UTR	-8.02498	8.00351e-05	0.0998386	FALSE
YJR104C	SOD1	protein_coding	5UTR	-3.17122	8.03099e-05	0.00711124	TRUE
YCL059C	KRR1	protein_coding	5UTR	3.31511	8.03823e-05	0.00711572	TRUE
YDR021W	FAL1	protein_coding	exon	-8.01561	8.06158e-05	0.102035	FALSE
YNL180C	RHO5	protein_coding	3UTR	-2.65908	8.10545e-05	0.00513756	TRUE
YGR246C	BRF1	protein_coding	3UTR	-3.57875	8.11442e-05	0.00671272	TRUE
YDL229W	SSB1	protein_coding	exon	4.03077	8.1274e-05	0.0073488	TRUE
YKL060C	FBA1	protein_coding	3UTR	-7.88723	8.13009e-05	0.00782992	TRUE
YEL033W	MTC7	protein_coding	5UTR	-0.947276	8.15266e-05	0.0017527	FALSE
YHL033C	RPL8A	protein_coding	exon	1.06071	8.15734e-05	0.00145313	TRUE
YLR167W	RPS31	protein_coding	exon	-1.14901	8.19394e-05	0.00145849	TRUE
YLR116W	MSL5	protein_coding	3UTR	-2.29262	8.21025e-05	0.0029692	TRUE
YKL141W	SDH3	protein_coding	3UTR	-8.02342	8.21432e-05	0.155862	FALSE
YNL067W	RPL9B	protein_coding	3UTR	-1.45981	8.24008e-05	0.00155947	TRUE
YLL026W	HSP104	protein_coding	3UTR	-3.4137	8.24529e-05	0.00294953	TRUE
YHL001W	RPL14B	protein_coding	exon	1.80745	8.25078e-05	0.00232771	TRUE
YBR082C	UBC4	protein_coding	3UTR	-2.33509	8.26686e-05	0.00274783	TRUE
YLR398C	SKI2	protein_coding	3UTR	-2.89947	8.27473e-05	0.0072742	TRUE
YEL071W	DLD3	protein_coding	exon	2.38674	8.28089e-05	0.00272825	TRUE
YOR315W	SFG1	protein_coding	3UTR	-4.25486	8.33721e-05	0.00749815	TRUE
YHR040W	BCD1	protein_coding	3UTR	-1.70556	8.37374e-05	0.00301398	TRUE
YMR285C	NGL2	protein_coding	3UTR	-8.01562	8.37594e-05	0.102612	FALSE
YOR046C	DBP5	protein_coding	exon	2.81608	8.38258e-05	0.00278197	TRUE
YOR198C	BFR1	protein_coding	5UTR	-3.17551	8.40412e-05	0.00689636	TRUE
YBR088C	POL30	protein_coding	3UTR	-7.88887	8.40567e-05	0.00456352	TRUE
YLR147C	SMD3	protein_coding	3UTR	-1.72231	8.41508e-05	0.00303582	TRUE
YDL125C	HNT1	protein_coding	3UTR	-7.88558	8.43638e-05	0.0047258	TRUE
YCL017C	NFS1	protein_coding	exon	3.94598	8.4758e-05	0.00457462	TRUE
YNL260C	LTO1	protein_coding	5UTR	-7.88229	8.51185e-05	0.00610732	TRUE
YBR150C	TBS1	protein_coding	exon	-3.17187	8.54154e-05	0.00698425	TRUE
YER062C	YER062C	protein_coding	exon	-4.15259	8.5471e-05	0.0038892	TRUE
YMR314W	PRE5	protein_coding	3UTR	-3.5802	8.58775e-05	0.00702074	TRUE
YOR312C	RPL20B	protein_coding	3UTR	-2.5882	8.60442e-05	0.00244845	TRUE
YMR080C	NAM7	protein_coding	exon	-2.34651	8.62681e-05	0.00305949	TRUE
YGL037C	PNC1	protein_coding	exon	-2.43688	8.63957e-05	0.00166176	TRUE
YNR020C	ATP23	protein_coding	3UTR	-3.1726	8.64829e-05	0.00730076	TRUE
YER021W	RPN3	protein_coding	3UTR	-4.25793	8.64917e-05	0.00753678	TRUE
YDR477W	SNF1	protein_coding	3UTR	-7.88723	8.65561e-05	0.00482206	TRUE
YOR344C	TYE7	protein_coding	exon	1.44063	8.69254e-05	0.00193392	TRUE
YIL044C	AGE2	protein_coding	5UTR	-2.58993	8.73147e-05	0.00294396	TRUE
YCL059C	KRR1	protein_coding	exon	1.86916	8.73262e-05	0.00308921	TRUE
YLL024C	SSA2	protein_coding	3UTR	-0.934122	8.77814e-05	0.00169964	FALSE
YDL075W	RPL31A	protein_coding	exon	-0.960593	8.78327e-05	0.00186658	FALSE
YCR037C	PHO87	protein_coding	3UTR	-4.26249	8.82296e-05	0.013325	FALSE
YLR450W	HMG2	protein_coding	exon	-1.46627	8.83489e-05	0.0032176	TRUE
YHR060W	VMA22	protein_coding	3UTR	-3.57077	8.85103e-05	0.00685842	TRUE
YDR044W	HEM13	protein_coding	3UTR	-3.48669	8.89586e-05	0.00487892	TRUE
YDR011W	SNQ2	protein_coding	exon	8.02913	8.93067e-05	0.00406298	TRUE
YMR152W	YIM1	protein_coding	exon	-3.15942	8.95174e-05	0.00734226	TRUE
YML067C	ERV41	protein_coding	3UTR	-3.48999	8.97235e-05	0.00490984	TRUE
YNL104C	LEU4	protein_coding	3UTR	-3.09386	8.98336e-05	0.00548874	TRUE
YFR052W	RPN12	protein_coding	3UTR	-7.89208	9.05992e-05	0.00479729	TRUE
YGR155W	CYS4	protein_coding	exon	-1.04674	9.07237e-05	0.00174756	TRUE
YIL116W	HIS5	protein_coding	exon	-2.51986	9.08785e-05	0.00495675	TRUE
YDR019C	GCV1	protein_coding	3UTR	-3.56642	9.187e-05	0.00740619	TRUE
YBR155W	CNS1	protein_coding	exon	3.98849	9.19775e-05	0.00906287	TRUE
YML121W	GTR1	protein_coding	exon	-2.66596	9.20822e-05	0.00516404	TRUE
YDR289C	RTT103	protein_coding	exon	-1.88973	9.22778e-05	0.00367433	TRUE
YLR397C	AFG2	protein_coding	5UTR	-3.16029	9.2801e-05	0.0161937	FALSE
YPL226W	NEW1	protein_coding	exon	7.95727	9.3054e-05	0.00302665	TRUE
YNL160W	YGP1	protein_coding	3UTR	-7.88398	9.33542e-05	0.00803251	TRUE
YER164W	CHD1	protein_coding	exon	-4.15076	9.3457e-05	0.00329856	TRUE
YBR085C-A	YBR085C-A	protein_coding	3UTR	-7.88237	9.35739e-05	0.00411088	TRUE
YHR172W	SPC97	protein_coding	3UTR	1.7123	9.39746e-05	0.00225826	TRUE
YKL196C	YKT6	protein_coding	3UTR	-3.17254	9.42418e-05	0.00744194	TRUE
YJL159W	HSP150	protein_coding	exon	-1.5393	9.46498e-05	0.00178384	TRUE
YOR015W	YOR015W	protein_coding	exon	-2.9074	9.60581e-05	0.0156946	FALSE
YOL048C	RRT8	protein_coding	3UTR	-1.97884	9.65725e-05	0.00339781	TRUE
YLR324W	PEX30	protein_coding	exon	-4.24816	9.70165e-05	0.00776335	TRUE
YKR093W	PTR2	protein_coding	exon	-1.99941	9.71336e-05	0.00340741	TRUE
YCL050C	APA1	protein_coding	5UTR	8.01222	9.72547e-05	0.00430998	TRUE
YNL289W	PCL1	protein_coding	exon	3.27734	9.74835e-05	0.00932867	TRUE
YCL041C	YCL041C	protein_coding	exon	1.73537	9.82087e-05	0.00344345	TRUE
YJR077C	MIR1	protein_coding	3UTR	-2.45285	9.85016e-05	0.00341509	TRUE
YOL071W	YOL071W	protein_coding	exon	-4.25938	9.86752e-05	0.00771951	TRUE
YBR267W	REI1	protein_coding	exon	1.47499	9.87989e-05	0.00325357	TRUE
YBR014C	GRX7	protein_coding	3UTR	-7.88881	9.90103e-05	0.00841172	TRUE
YPL057C	SUR1	protein_coding	3UTR	-4.25123	9.91338e-05	0.00774921	TRUE
YBR283C	SSH1	protein_coding	3UTR	-4.15601	9.92159e-05	0.00603832	TRUE
YLR212C	TUB4	protein_coding	3UTR	-2.70947	9.96535e-05	0.0078988	TRUE
YPL088W	YPL088W	protein_coding	exon	-2.71781	9.97439e-05	0.00753357	TRUE
YML063W	RPS1B	protein_coding	3UTR	-4.15074	9.98339e-05	0.00502659	TRUE
YMR217W	GUA1	protein_coding	exon	-1.68715	9.99416e-05	0.00237327	TRUE
YMR186W	HSC82	protein_coding	exon	1.6059	0.00010037	0.00188438	TRUE
YDR226W	ADK1	protein_coding	exon	1.30491	0.000100654	0.00187807	TRUE
YOL120C	RPL18A	protein_coding	exon	0.929225	0.000101654	0.00190492	FALSE
YJL095W	BCK1	protein_coding	5UTR	-7.88402	0.000101705	0.00859823	TRUE
YOR136W	IDH2	protein_coding	3UTR	-3.08565	0.000101961	0.00560098	TRUE
YGL028C	SCW11	protein_coding	3UTR	-2.01326	0.000102648	0.00353307	TRUE
YMR236W	TAF9	protein_coding	exon	-1.71289	0.000102659	0.00353307	TRUE
YHR186C	KOG1	protein_coding	exon	-3.08566	0.000102965	0.00576159	TRUE
YNL149C	PGA2	protein_coding	exon	-1.81943	0.000103091	0.00283987	TRUE
YHR128W	FUR1	protein_coding	3UTR	-7.88562	0.000103098	0.00862766	TRUE
YGL232W	TAN1	protein_coding	exon	-3.39066	0.000103269	0.00357761	TRUE
YDR380W	ARO10	protein_coding	exon	8.10681	0.00010332	0.00713566	TRUE
YDR012W	RPL4B	protein_coding	exon	8.08391	0.000103361	0.00949495	TRUE
YGR255C	COQ6	protein_coding	exon	8.09927	0.000103689	0.0097783	TRUE
YPL270W	MDL2	protein_coding	exon	-2.9088	0.000103734	0.00797655	TRUE
YPR086W	SUA7	protein_coding	exon	-2.46401	0.000103872	0.00359696	TRUE
YBR236C	ABD1	protein_coding	3UTR	-2.49436	0.000104145	0.00535603	TRUE
YIL121W	QDR2	protein_coding	3UTR	-7.88721	0.000104223	0.00888293	TRUE
YOR245C	DGA1	protein_coding	5UTR	-1.98782	0.000104656	0.00361592	TRUE
YDR329C	PEX3	protein_coding	3UTR	-2.89535	0.000104852	0.0167743	FALSE
YOR101W	RAS1	protein_coding	3UTR	-3.09136	0.000106013	0.0100867	FALSE
YNR049C	MSO1	protein_coding	5UTR	-1.9374	0.000106663	0.00367389	TRUE
YOR274W	MOD5	protein_coding	exon	-2.02175	0.000106851	0.00581442	TRUE
YKL129C	MYO3	protein_coding	3UTR	-2.41096	0.00010707	0.00928134	TRUE
YLR109W	AHP1	protein_coding	3UTR	-0.900932	0.000107623	0.00205869	FALSE
YDR335W	MSN5	protein_coding	3UTR	-2.35005	0.000107846	0.00378807	TRUE
YIL101C	XBP1	protein_coding	3UTR	-7.89196	0.000108161	0.00901754	TRUE
YLR029C	RPL15A	protein_coding	3UTR	-1.00935	0.0001083	0.00183696	TRUE
YCR002C	CDC10	protein_coding	exon	2.82999	0.000108436	0.00471502	TRUE
YHR106W	TRR2	protein_coding	exon	-2.82111	0.000108632	0.00460089	TRUE
YPR165W	RHO1	protein_coding	3UTR	-7.88563	0.000108632	0.00904519	TRUE
YGR034W	RPL26B	protein_coding	3UTR	-1.76805	0.000108965	0.00652007	TRUE
YCR081C-A	YCR081C-A	protein_coding	5UTR	2.40344	0.000109402	0.00397002	TRUE
YDR025W	RPS11A	protein_coding	exon	1.93644	0.000109814	0.00376353	TRUE
YKL045W	PRI2	protein_coding	3UTR	-2.66375	0.000110139	0.00564263	TRUE
YKL114C	APN1	protein_coding	exon	-1.28363	0.000110465	0.00300173	TRUE
YDR208W	MSS4	protein_coding	exon	-3.0944	0.000110666	0.00603832	TRUE
YPL027W	SMA1	protein_coding	exon	-7.89191	0.000111077	0.00873204	TRUE
YDR157W	YDR157W	protein_coding	3UTR	1.70263	0.000111402	0.00351928	TRUE
YHR179W	OYE2	protein_coding	exon	1.58228	0.000111598	0.00204306	TRUE
YDL147W	RPN5	protein_coding	3UTR	-4.1507	0.000111826	0.00549334	TRUE
YLR056W	ERG3	protein_coding	exon	-1.27191	0.000112443	0.00206869	TRUE
YKL025C	PAN3	protein_coding	exon	-2.2718	0.000112498	0.0047258	TRUE
YMR311C	GLC8	protein_coding	3UTR	-1.12481	0.000112647	0.00209204	TRUE
YMR120C	ADE17	protein_coding	exon	-3.4931	0.000112754	0.00569717	TRUE
YLR060W	FRS1	protein_coding	exon	-2.27753	0.00011285	0.00570719	TRUE
YCL030C	HIS4	protein_coding	exon	2.79313	0.000113651	0.00386484	TRUE
YPL110C	GDE1	protein_coding	3UTR	-7.88876	0.000114375	0.00869565	TRUE
YIL021W	RPB3	protein_coding	exon	2.273	0.000114479	0.00397002	TRUE
YDR001C	NTH1	protein_coding	3UTR	-7.8872	0.000114543	0.00893036	TRUE
YMR173W	DDR48	protein_coding	exon	3.89905	0.000114877	0.00625701	TRUE
YHR078W	YHR078W	protein_coding	exon	-2.8397	0.000115469	0.00679454	TRUE
Q0065	AI4	protein_coding	exon	-3.29772	0.000115902	0.0026548	TRUE
YDR501W	PLM2	protein_coding	3UTR	-7.88564	0.000116506	0.00881035	TRUE
YBR170C	NPL4	protein_coding	exon	2.27985	0.000116652	0.00587903	TRUE
YOR310C	NOP58	protein_coding	3UTR	-1.6802	0.000116867	0.00308316	TRUE
YOR158W	PET123	protein_coding	exon	-7.88564	0.000116872	0.00883343	TRUE
YLL050C	COF1	protein_coding	3UTR	-2.11736	0.000116872	0.00308316	TRUE
YNL190W	YNL190W	protein_coding	exon	1.52431	0.000117025	0.00269107	TRUE
YDR432W	NPL3	protein_coding	exon	1.27315	0.00011763	0.00251501	TRUE
YNL262W	POL2	protein_coding	3UTR	-3.47998	0.000118064	0.0096843	TRUE
YLL028W	TPO1	protein_coding	exon	8.02937	0.000118253	0.00640656	TRUE
YCL045C	EMC1	protein_coding	exon	3.85233	0.000118379	0.00400197	TRUE
YPL131W	RPL5	protein_coding	exon	-0.896987	0.000118909	0.00218901	FALSE
YAL036C	RBG1	protein_coding	3UTR	-2.21291	0.000118912	0.00369537	TRUE
YPR102C	RPL11A	protein_coding	exon	8.18014	0.00011959	0.0304896	FALSE
YOL097C	WRS1	protein_coding	exon	1.36332	0.000120275	0.00273736	TRUE
YDL100C	GET3	protein_coding	exon	-1.24893	0.000120774	0.00219686	TRUE
YOR185C	GSP2	protein_coding	3UTR	-7.89029	0.000120878	0.00942808	TRUE
YLR397C	AFG2	protein_coding	3UTR	-7.8841	0.000121246	0.0130009	FALSE
YDL237W	AIM6	protein_coding	3UTR	-2.82006	0.000122282	0.00711124	TRUE
YMR045C	YMR045C	transposable_element	exon	-3.40414	0.000122445	0.0041052	TRUE
YPR074C	TKL1	protein_coding	exon	1.67275	0.000122673	0.00217713	TRUE
YMR187C	YMR187C	protein_coding	5UTR	-4.25638	0.000122896	0.0320562	FALSE
YJL136C	RPS21B	protein_coding	3UTR	-1.06699	0.000122928	0.00230118	TRUE
YBR073W	RDH54	protein_coding	exon	7.95677	0.000123014	0.00413491	TRUE
YGL022W	STT3	protein_coding	3UTR	-2.84546	0.000123469	0.00998723	TRUE
YBR069C	TAT1	protein_coding	exon	3.82746	0.000123548	0.00414092	TRUE
YIL126W	STH1	protein_coding	3UTR	-4.25427	0.000123962	0.032327	FALSE
YDR471W	RPL27B	protein_coding	exon	1.13188	0.000124294	0.00227059	TRUE
YMR070W	MOT3	protein_coding	3UTR	-7.8872	0.000124359	0.00963794	TRUE
YDR224C	HTB1	protein_coding	3UTR	-4.03856	0.000124805	0.00412809	TRUE
tH(GUG)M	tH(GUG)M	tRNA	exon	-4.61963	0.230752	1	FALSE
YPL271W	ATP15	protein_coding	3UTR	-3.09042	0.000126478	0.0101803	FALSE
YNL141W	AAH1	protein_coding	exon	-2.23011	0.000126517	0.00430077	TRUE
YKL145W	RPT1	protein_coding	exon	-3.01366	0.000126881	0.00445984	TRUE
YOR064C	YNG1	protein_coding	5UTR	-1.83437	0.000127045	0.00422769	TRUE
YLR439W	MRPL4	protein_coding	exon	-2.52614	0.00012736	0.0102157	FALSE
YLR291C	GCD7	protein_coding	5UTR	-7.8872	0.000128132	0.00965228	TRUE
YLR370C	ARC18	protein_coding	3UTR	-1.80922	0.000128304	0.00389822	TRUE
YOR312C	RPL20B	protein_coding	exon	-1.11688	0.000128709	0.00226654	TRUE
YEL055C	POL5	protein_coding	exon	3.12643	0.000128806	0.00403623	TRUE
YEL031W	SPF1	protein_coding	3UTR	-3.4006	0.000128811	0.00430077	TRUE
YGL123W	RPS2	protein_coding	exon	1.02452	0.000128843	0.00233778	TRUE
YNL327W	EGT2	protein_coding	exon	-1.72336	0.000129237	0.0026512	TRUE
YDL100C	GET3	protein_coding	3UTR	-2.45621	0.000129372	0.00431201	TRUE
YOR293W	RPS10A	protein_coding	3UTR	-4.1399	0.000129468	0.00711085	TRUE
YNR019W	ARE2	protein_coding	3UTR	-7.88257	0.000129832	0.00961503	TRUE
YDR019C	GCV1	protein_coding	exon	-1.94255	0.000129932	0.00712792	TRUE
YOL040C	RPS15	protein_coding	3UTR	-2.17648	0.000130043	0.00266568	TRUE
YJR045C	SSC1	protein_coding	5UTR	-1.17732	0.000130288	0.00269103	TRUE
YPR020W	ATP20	protein_coding	3UTR	-3.40407	0.00013075	0.00434657	TRUE
YLR397C	AFG2	protein_coding	3UTR	-7.88411	0.000131177	0.00968529	TRUE
YMR290C	HAS1	protein_coding	exon	2.57011	0.000131273	0.00646952	TRUE
YGL216W	KIP3	protein_coding	exon	8.11458	0.000131377	0.00994549	TRUE
YDR398W	UTP5	protein_coding	exon	3.88484	0.000131426	0.00625327	TRUE
YDR113C	PDS1	protein_coding	3UTR	-4.25943	0.000131838	0.0907063	FALSE
YDL085C-A	YDL085C-A	protein_coding	3UTR	-3.08199	0.00013184	0.00535821	TRUE
YJR001W	AVT1	protein_coding	3UTR	-7.88103	0.000131967	0.00956064	TRUE
YKR059W	TIF1	protein_coding	3UTR	-2.75976	0.000132684	0.00460919	TRUE
YMR113W	FOL3	protein_coding	exon	-7.8872	0.000132734	0.00990639	TRUE
YDL039C	PRM7	protein_coding	exon	-2.34435	0.000133759	0.00491346	TRUE
YDR406W-A	YDR406W-A	protein_coding	exon	-7.88257	0.000134178	0.00968547	TRUE
YHR179W	OYE2	protein_coding	3UTR	-4.03475	0.000134486	0.00418495	TRUE
YOR311C	DGK1	protein_coding	3UTR	-3.0874	0.000134489	0.0054468	TRUE
YMR218C	TRS130	protein_coding	3UTR	-4.15545	0.000134499	0.00706415	TRUE
RDN5-1	RDN5-1	rRNA	exon	0.919124	0.00013462	0.00264234	FALSE
YPL234C	VMA11	protein_coding	exon	-1.63593	0.000136014	0.00241945	TRUE
YIL136W	OM45	protein_coding	exon	-7.89183	0.000136417	0.0260723	FALSE
YGL040C	HEM2	protein_coding	3UTR	-2.05982	0.000136616	0.00448592	TRUE
YAL004W	YAL004W	protein_coding	5UTR	-7.73136	0.000136685	0.00645103	TRUE
YJL171C	TOH1	protein_coding	5UTR	-7.88874	0.000136952	0.0346207	FALSE
YER073W	ALD5	protein_coding	3UTR	-7.8872	0.00013707	0.026149	FALSE
YHR026W	VMA16	protein_coding	exon	-4.03663	0.000137383	0.00425711	TRUE
YLR291C	GCD7	protein_coding	exon	-7.7368	0.000137487	0.00721604	TRUE
YBR143C	SUP45	protein_coding	3UTR	-2.39472	0.000138294	0.00360836	TRUE
YOR063W	RPL3	protein_coding	exon	0.985371	0.000138372	0.00270253	FALSE
YJR102C	VPS25	protein_coding	3UTR	-3.49367	0.00013949	0.0104224	FALSE
YMR006C	PLB2	protein_coding	exon	-1.48884	0.000140006	0.00430998	TRUE
YHL015W	RPS20	protein_coding	exon	-0.918603	0.000140122	0.00249932	FALSE
YER178W	PDA1	protein_coding	5UTR	3.19248	0.000140227	0.00782805	TRUE
YNL281W	HCH1	protein_coding	3UTR	-2.75975	0.000141009	0.00580031	TRUE
YIL145C	PAN6	protein_coding	3UTR	-7.88257	0.000141259	0.0361782	FALSE
YDR038C	ENA5	protein_coding	5UTR	-7.8872	0.000141535	0.035485	FALSE
YGR017W	YGR017W	protein_coding	3UTR	-2.35459	0.000141619	0.00743952	TRUE
YEL011W	GLC3	protein_coding	exon	-8.2686	0.000141675	0.00799596	TRUE
YGR192C	TDH3	protein_coding	exon	-0.943509	0.000142235	0.00250822	FALSE
YER114C	BOI2	protein_coding	exon	2.83092	0.000142242	0.00741684	TRUE
YMR039C	SUB1	protein_coding	3UTR	-7.88875	0.000142257	0.036377	FALSE
YGL197W	MDS3	protein_coding	exon	8.12173	0.000142392	0.0101134	FALSE
snR86	snR86	snoRNA	exon	0.909076	0.000142522	0.00253274	FALSE
YDR406W-A	YDR406W-A	protein_coding	exon	-7.88256	0.000142573	0.021165	FALSE
YCL037C	SRO9	protein_coding	3UTR	1.36526	0.000142724	0.00251464	TRUE
YIL069C	RPS24B	protein_coding	3UTR	-1.40287	0.000143304	0.00316046	TRUE
YGR216C	GPI1	protein_coding	3UTR	-4.14186	0.000143566	0.00736449	TRUE
YGR135W	PRE9	protein_coding	3UTR	-1.7602	0.000143576	0.0045929	TRUE
YDL053C	PBP4	protein_coding	3UTR	-2.06578	0.000144044	0.00491346	TRUE
snR4	snR4	snoRNA	exon	1.03249	0.000144067	0.00255516	TRUE
YJR007W	SUI2	protein_coding	exon	-1.24151	0.000144445	0.00253824	TRUE
YMR226C	YMR226C	protein_coding	exon	-1.1548	0.000145196	0.00248862	TRUE
YER044C	ERG28	protein_coding	exon	-3.391	0.000146547	0.00824464	TRUE
YCL029C	BIK1	protein_coding	exon	8.02966	0.00014659	0.0124701	FALSE
YJR145C	RPS4A	protein_coding	3UTR	-4.15216	0.000146891	0.0128345	FALSE
YNL016W	PUB1	protein_coding	exon	1.49007	0.000146994	0.00322673	TRUE
YMR187C	YMR187C	protein_coding	3UTR	-2.76143	0.000147295	0.00709526	TRUE
YKR047W	YKR047W	protein_coding	5UTR	-2.02823	0.000147649	0.00764094	TRUE
YIL100W	YIL100W	protein_coding	5UTR	-7.89506	0.000148763	0.035765	FALSE
YHL011C	PRS3	protein_coding	3UTR	-2.39249	0.000148848	0.00452481	TRUE
YHR208W	BAT1	protein_coding	exon	1.54942	0.000149186	0.00260369	TRUE
YOL022C	TSR4	protein_coding	exon	8.04481	0.000149255	0.00713313	TRUE
YML001W	YPT7	protein_coding	3UTR	-7.88408	0.000149654	0.020654	FALSE
YMR299C	DYN3	protein_coding	5UTR	-7.88253	0.000149839	0.0209563	FALSE
YGR083C	GCD2	protein_coding	exon	2.1251	0.000150904	0.00482606	TRUE
YNL214W	PEX17	protein_coding	3UTR	-3.47598	0.00015145	0.0108091	FALSE
YHR175W-A	YHR175W-A	protein_coding	5UTR	-7.88564	0.000151553	0.0363407	FALSE
YOR151C	RPB2	protein_coding	3UTR	-7.73324	0.000152109	0.0074719	TRUE
YER083C	GET2	protein_coding	3UTR	-4.15529	0.000152331	0.00724862	TRUE
YMR193W	MRPL24	protein_coding	3UTR	-7.88252	0.000152363	0.0363407	FALSE
YMR281W	GPI12	protein_coding	exon	-7.88564	0.000152487	0.0361257	FALSE
YPL092W	SSU1	protein_coding	3UTR	-7.88096	0.000152933	0.0345769	FALSE
YDR458C	HEH2	protein_coding	exon	-7.8872	0.000153205	0.0362446	FALSE
YPL218W	SAR1	protein_coding	exon	-2.0657	0.000153532	0.00491501	TRUE
YPL007C	TFC8	protein_coding	exon	-7.89193	0.000153908	0.0990829	FALSE
YKL126W	YPK1	protein_coding	3UTR	-4.15527	0.000154083	0.00607285	TRUE
YCL026C-B	HBN1	protein_coding	3UTR	8.08652	0.000154252	0.0109625	FALSE
YLR342W	FKS1	protein_coding	3UTR	-4.03102	0.000154521	0.0049331	TRUE
YNL197C	WHI3	protein_coding	3UTR	-7.88095	0.000154525	0.021432	FALSE
YNL311C	SKP2	protein_coding	5UTR	-1.93542	0.00015533	0.00985457	TRUE
YLR058C	SHM2	protein_coding	exon	-1.59505	0.000155416	0.00396357	TRUE
YPR113W	PIS1	protein_coding	3UTR	-7.735	0.000155577	0.0082298	TRUE
YJR132W	NMD5	protein_coding	3UTR	-7.73325	0.000155633	0.00784677	TRUE
YHR154W	RTT107	protein_coding	exon	-4.14898	0.000156169	0.00739311	TRUE
YAL037W	YAL037W	protein_coding	3UTR	-2.38956	0.000156366	0.00468333	TRUE
YLR328W	NMA1	protein_coding	3UTR	-4.1388	0.000157449	0.00776065	TRUE
YLR073C	RFU1	protein_coding	3UTR	-3.07178	0.000157515	0.0120209	FALSE
YJL078C	PRY3	protein_coding	3UTR	-2.59979	0.000157814	0.00832221	TRUE
YKL216W	URA1	protein_coding	exon	1.83655	0.000158047	0.00315244	TRUE
YGR147C	NAT2	protein_coding	5UTR	-3.40044	0.00015853	0.00749346	TRUE
snR66	snR66	snoRNA	exon	0.983094	0.000159145	0.0030316	FALSE
YNL137C	NAM9	protein_coding	3UTR	-7.73501	0.000159239	0.00811846	TRUE
YFR024C-A	LSB3	protein_coding	3UTR	-7.88405	0.000160737	0.156213	FALSE
YOR086C	TCB1	protein_coding	3UTR	-2.76468	0.000160766	0.00568225	TRUE
YJR064W	CCT5	protein_coding	exon	-2.39128	0.00016182	0.00504525	TRUE
YLR330W	CHS5	protein_coding	exon	-1.45721	0.000161956	0.0048249	TRUE
YGR024C	THG1	protein_coding	exon	-3.40207	0.000162046	0.00738916	TRUE
YER100W	UBC6	protein_coding	3UTR	-7.73328	0.000162334	0.00811943	TRUE
YER167W	BCK2	protein_coding	exon	2.82366	0.000162974	0.00894444	TRUE
YLR034C	SMF3	protein_coding	3UTR	-4.15054	0.000164363	0.0125052	FALSE
YIL149C	MLP2	protein_coding	3UTR	-7.88405	0.000164705	0.155828	FALSE
YMR272C	SCS7	protein_coding	3UTR	-7.73673	0.00016477	0.0142466	FALSE
YEL044W	IES6	protein_coding	3UTR	-2.65387	0.000165079	0.0115887	FALSE
YCL005W-A	VMA9	protein_coding	exon	-1.15907	0.000165134	0.00283399	TRUE
YBL024W	NCL1	protein_coding	exon	2.74139	0.000165245	0.00512921	TRUE
YOL011W	PLB3	protein_coding	exon	-1.72482	0.000165305	0.00490568	TRUE
YGL123W	RPS2	protein_coding	exon	0.967084	0.000165561	0.00283968	FALSE
YLR438W	CAR2	protein_coding	exon	-2.60401	0.000165613	0.0143048	FALSE
YGR110W	CLD1	protein_coding	3UTR	-7.88878	0.00016582	0.156444	FALSE
LSR1	LSR1	snRNA	exon	0.963139	0.000165939	0.00313752	FALSE
YOR204W	DED1	protein_coding	3UTR	-1.57535	0.000167791	0.00328609	TRUE
YBR010W	HHT1	protein_coding	3UTR	-2.23762	0.00016827	0.00329327	TRUE
YEL031W	SPF1	protein_coding	3UTR	-7.73158	0.000168362	0.010493	FALSE
YDR005C	MAF1	protein_coding	3UTR	-7.88248	0.000168802	0.15813	FALSE
YDR377W	ATP17	protein_coding	exon	-4.02838	0.000169647	0.0055923	TRUE
YPR062W	FCY1	protein_coding	exon	-1.04072	0.000169947	0.00283218	TRUE
YEL017W	GTT3	protein_coding	3UTR	-3.08237	0.00017005	0.012725	FALSE
YJL010C	NOP9	protein_coding	3UTR	-7.88563	0.000171086	0.489704	FALSE
YCL064C	CHA1	protein_coding	exon	2.06305	0.000171991	0.00489885	TRUE
YNL007C	SIS1	protein_coding	3UTR	-2.58627	0.000172193	0.00870222	TRUE
YGR200C	ELP2	protein_coding	exon	2.81852	0.000172733	0.00936597	TRUE
YLR438C-A	LSM3	protein_coding	3UTR	-2.22543	0.000173026	0.00665867	TRUE
YBL017C	PEP1	protein_coding	exon	3.09515	0.000173578	0.00532886	TRUE
YMR049C	ERB1	protein_coding	3UTR	-1.92599	0.000173639	0.00545417	TRUE
YLR154C	RNH203	protein_coding	exon	-4.14684	0.000173874	0.0132244	FALSE
YDR135C	YCF1	protein_coding	3UTR	-2.0259	0.000174658	0.00535574	TRUE
YMR311C	GLC8	protein_coding	exon	-1.07916	0.000174742	0.00290267	TRUE
YAL029C	MYO4	protein_coding	3UTR	-2.39634	0.000174912	0.00540901	TRUE
YBR118W	TEF2	protein_coding	exon	8.10037	0.000175201	0.0422068	FALSE
YGL120C	PRP43	protein_coding	5UTR	3.15802	0.000175202	0.00951517	TRUE
YJL128C	PBS2	protein_coding	3UTR	-1.77371	0.000175277	0.00573402	TRUE
YBR288C	APM3	protein_coding	3UTR	-2.99461	0.000175282	0.0060883	TRUE
YDL070W	BDF2	protein_coding	exon	-1.63448	0.000176131	0.00349982	TRUE
YJR121W	ATP2	protein_coding	3UTR	-7.73333	0.000176241	0.00951639	TRUE
YGL148W	ARO2	protein_coding	exon	1.38366	0.000176252	0.00374282	TRUE
YML081C-A	ATP18	protein_coding	3UTR	-3.01068	0.000179315	0.00826547	TRUE
YOL145C	CTR9	protein_coding	3UTR	-1.48195	0.000179869	0.00512776	TRUE
YKL154W	SRP102	protein_coding	exon	-2.13291	0.000179886	0.00699352	TRUE
YDL146W	LDB17	protein_coding	3UTR	-2.52385	0.000179951	0.00548952	TRUE
YMR290C	HAS1	protein_coding	3UTR	-1.77761	0.000180827	0.00513507	TRUE
YNL008C	ASI3	protein_coding	5UTR	-7.88401	0.000181242	1	FALSE
YGR161W-C	YGR161W-C	protein_coding	3UTR	-4.15663	0.000181278	0.0126345	FALSE
YNL163C	RIA1	protein_coding	exon	8.02983	0.000181652	0.0134581	FALSE
YBL076C	ILS1	protein_coding	exon	2.13218	0.000181683	0.00304106	TRUE
YML053C	YML053C	protein_coding	5UTR	-1.79253	0.00018299	0.00562285	TRUE
snR69	snR69	snoRNA	exon	1.38225	0.000183714	0.00308553	TRUE
tG(GCC)G1	tG(GCC)G1	tRNA	exon	-4.61958	0.22866	1	FALSE
YJL166W	QCR8	protein_coding	3UTR	-4.15356	0.000184669	0.0126345	FALSE
YJL138C	TIF2	protein_coding	3UTR	-7.73002	0.000184683	0.00900938	TRUE
YOR265W	RBL2	protein_coding	exon	-2.45034	0.000184903	0.00985972	TRUE
YLL040C	VPS13	protein_coding	exon	-7.73669	0.000184986	0.0153625	FALSE
YKL190W	CNB1	protein_coding	3UTR	-2.17332	0.000185833	0.0053583	TRUE
YML058W	SML1	protein_coding	exon	-1.32854	0.000186155	0.00314908	TRUE
YGR228W	YGR228W	protein_coding	exon	-1.27099	0.000187246	0.00359429	TRUE
YML035C	AMD1	protein_coding	exon	3.84622	0.000188093	0.00933577	TRUE
YKL196C	YKT6	protein_coding	3UTR	-3.09539	0.000188146	0.0434463	FALSE
YNL112W	DBP2	protein_coding	3UTR	-4.14745	0.000188356	0.0128345	FALSE
YER177W	BMH1	protein_coding	3UTR	-4.13918	0.000188546	0.0237921	FALSE
YML100W	TSL1	protein_coding	3UTR	-7.74001	0.000189209	0.0115008	FALSE
YPR109W	YPR109W	protein_coding	exon	-3.40651	0.000189347	0.00928134	TRUE
YMR312W	ELP6	protein_coding	exon	3.16795	0.000189596	0.010053	FALSE
YPR041W	TIF5	protein_coding	exon	1.10425	0.000189831	0.00309285	TRUE
YJR117W	STE24	protein_coding	3UTR	-1.51819	0.000190628	0.00574285	TRUE
YFL031C-A	YFL031C-A	protein_coding	5UTR	1.46149	0.000190924	0.00317007	TRUE
YGR007W	ECT1	protein_coding	3UTR	-1.69009	0.000191472	0.00311696	TRUE
YAL035W	FUN12	protein_coding	exon	1.33375	0.000191509	0.00374282	TRUE
YHR097C	YHR097C	protein_coding	5UTR	-2.53657	0.00019163	0.00581719	TRUE
YNL003C	PET8	protein_coding	3UTR	-2.9992	0.000192735	0.00951639	TRUE
YKL212W	SAC1	protein_coding	3UTR	-1.91455	0.000192839	0.00584033	TRUE
YOR133W	EFT1	protein_coding	exon	8.09301	0.000193166	0.115035	FALSE
YNL085W	MKT1	protein_coding	3UTR	-1.44471	0.000194736	0.0037067	TRUE
YDL092W	SRP14	protein_coding	3UTR	-3.38246	0.000194776	0.0117815	FALSE
YBR273C	UBX7	protein_coding	exon	2.12949	0.000194897	0.00858205	TRUE
YML001W	YPT7	protein_coding	exon	-2.02432	0.000195296	0.00593476	TRUE
YLR088W	GAA1	protein_coding	3UTR	-3.00415	0.000195796	0.0098579	TRUE
YOR347C	PYK2	protein_coding	3UTR	-7.73503	0.000196456	0.0144057	FALSE
YFL008W	SMC1	protein_coding	exon	-1.8582	0.000196907	0.00864768	TRUE
YDR155C	CPR1	protein_coding	exon	1.05965	0.000197174	0.00361303	TRUE
YHR087W	RTC3	protein_coding	exon	-3.49532	0.000197463	0.00604145	TRUE
YBL046W	PSY4	protein_coding	exon	1.45015	0.000197768	0.00600736	TRUE
YBR068C	BAP2	protein_coding	3UTR	-2.22375	0.000198734	0.0104278	FALSE
YCL030C	HIS4	protein_coding	3UTR	-2.68983	0.000199039	0.00600881	TRUE
YLR355C	ILV5	protein_coding	exon	1.0856	0.000199758	0.00302767	TRUE
YOL137W	BSC6	protein_coding	3UTR	-2.11204	0.000199845	0.00759524	TRUE
YPR181C	SEC23	protein_coding	3UTR	-1.74056	0.000200002	0.00387695	TRUE
YLR256W-A	YLR256W-A	transposable_element	exon	3.90195	0.000200516	0.00863639	TRUE
YLR325C	RPL38	protein_coding	exon	0.932529	0.000201572	0.00333281	FALSE
YIL076W	SEC28	protein_coding	3UTR	-2.75405	0.00020178	0.00987524	TRUE
YJL200C	ACO2	protein_coding	exon	-4.02312	0.000201925	0.00911909	TRUE
YMR131C	RRB1	protein_coding	exon	1.28868	0.000202239	0.00382517	TRUE
YNR016C	ACC1	protein_coding	exon	1.74221	0.000203742	0.00329057	TRUE
YDR477W	SNF1	protein_coding	3UTR	-7.73666	0.000204179	0.014817	FALSE
YMR315W	YMR315W	protein_coding	3UTR	-3.01283	0.000204281	0.00975135	TRUE
YDR496C	PUF6	protein_coding	3UTR	-4.15048	0.000204582	0.0136755	FALSE
YJR070C	LIA1	protein_coding	exon	-1.78148	0.000205447	0.00563849	TRUE
YLR017W	MEU1	protein_coding	exon	7.94742	0.000205615	0.0100192	FALSE
YBR261C	TAE1	protein_coding	5UTR	-2.39461	0.000206187	0.00785527	TRUE
YEL026W	SNU13	protein_coding	exon	-1.67399	0.000206934	0.00427751	TRUE
YBR023C	CHS3	protein_coding	3UTR	-7.7399	0.00020698	0.0153244	FALSE
YKL007W	CAP1	protein_coding	3UTR	-3.3932	0.000207805	0.0107932	FALSE
YBR269C	SDH8	protein_coding	exon	3.87475	0.000207881	0.00950456	TRUE
YKL006W	RPL14A	protein_coding	3UTR	-7.73341	0.000209073	0.0156144	FALSE
YOR298C-A	MBF1	protein_coding	3UTR	-2.68276	0.000209117	0.0062746	TRUE
YGR200C	ELP2	protein_coding	exon	7.92344	0.000209236	0.0101107	FALSE
YOR271C	FSF1	protein_coding	3UTR	-1.67303	0.000209396	0.0062473	TRUE
YNL104C	LEU4	protein_coding	3UTR	-7.73503	0.000209642	0.0152241	FALSE
YGL036W	YGL036W	protein_coding	exon	-2.77543	0.000209767	0.00776392	TRUE
YHL027W	RIM101	protein_coding	3UTR	-3.39792	0.000209791	0.0124791	FALSE
YGL135W	RPL1B	protein_coding	exon	8.00823	0.000209949	0.0139645	FALSE
YPL261C	YPL261C	protein_coding	exon	7.95511	0.000210509	0.009967	TRUE
YER142C	MAG1	protein_coding	3UTR	-3.39636	0.000213265	0.00948796	TRUE
YDR188W	CCT6	protein_coding	exon	1.9658	0.000213295	0.00506911	TRUE
YMR011W	HXT2	protein_coding	3UTR	-4.04349	0.000213492	0.00921422	TRUE
YDL041W	YDL041W	protein_coding	3UTR	-1.99567	0.000213822	0.00922611	TRUE
YKL035W	UGP1	protein_coding	exon	-1.84042	0.000214306	0.00509034	TRUE
YOR362C	PRE10	protein_coding	3UTR	-1.3222	0.000214853	0.00401574	TRUE
YGL216W	KIP3	protein_coding	exon	8.02995	0.0002149	0.0144582	FALSE
YBR024W	SCO2	protein_coding	3UTR	1.37865	0.000216621	0.00353599	TRUE
YHR104W	GRE3	protein_coding	3UTR	-7.73503	0.00021676	0.0155001	FALSE
YDL014W	NOP1	protein_coding	exon	-1.13306	0.000217825	0.00346625	TRUE
YER155C	BEM2	protein_coding	3UTR	-7.73181	0.000218667	0.0159732	FALSE
YJR070C	LIA1	protein_coding	3UTR	-1.87436	0.000218755	0.00516773	TRUE
YLR055C	SPT8	protein_coding	exon	-1.65038	0.000219494	0.00970897	TRUE
YPL032C	SVL3	protein_coding	3UTR	-2.38804	0.000219679	0.00826649	TRUE
YGR118W	RPS23A	protein_coding	3UTR	-2.58386	0.000219708	0.00806234	TRUE
YLR244C	MAP1	protein_coding	3UTR	-1.47691	0.000220624	0.00602514	TRUE
snR78	snR78	snoRNA	exon	1.14015	0.000220636	0.00395745	TRUE
YIL082W-A	YIL082W-A	transposable_element	exon	8.01571	0.000222353	0.0148398	FALSE
YNL160W	YGP1	protein_coding	3UTR	-7.73343	0.000222782	0.0157061	FALSE
YJL179W	PFD1	protein_coding	exon	-4.02689	0.000223446	0.0114825	FALSE
YFR009W	GCN20	protein_coding	exon	-2.681	0.000223499	0.00667912	TRUE
YPL231W	FAS2	protein_coding	exon	1.87306	0.000224148	0.00526391	TRUE
YOL060C	MAM3	protein_coding	3UTR	-7.73504	0.000224162	0.0158984	FALSE
YBR254C	TRS20	protein_coding	3UTR	-1.88007	0.000224393	0.0115193	FALSE
YMR236W	TAF9	protein_coding	3UTR	-2.99399	0.000225428	0.0105153	FALSE
YDR332W	IRC3	protein_coding	exon	-7.73344	0.000226291	0.0159762	FALSE
YDR512C	EMI1	protein_coding	5UTR	-3.39174	0.000226711	0.00826517	TRUE
YBR121C	GRS1	protein_coding	exon	2.26098	0.00022689	0.00456239	TRUE
YER031C	YPT31	protein_coding	exon	2.04293	0.000227114	0.00522434	TRUE
RDN25-1	RDN25-1	rRNA	exon	-2.4996	0.00022767	0.28186	FALSE
snR43	snR43	snoRNA	exon	0.929094	0.000228149	0.00368341	FALSE
YER070W	RNR1	protein_coding	3UTR	-2.93257	0.000228323	0.00672582	TRUE
YKL009W	MRT4	protein_coding	exon	2.04191	0.000228472	0.00524814	TRUE
YKL056C	TMA19	protein_coding	3UTR	-1.00307	0.000229573	0.00370202	TRUE
YBL092W	RPL32	protein_coding	exon	0.864839	0.000230516	0.00383522	FALSE
YOR361C	PRT1	protein_coding	exon	7.73085	0.00023131	0.00626292	TRUE
YKL077W	YKL077W	protein_coding	3UTR	-4.03813	0.000232157	0.0109066	FALSE
YDR356W	SPC110	protein_coding	3UTR	-3.4016	0.000232171	0.0163226	FALSE
YDL064W	UBC9	protein_coding	exon	-2.51685	0.000232199	0.00679454	TRUE
YPL092W	SSU1	protein_coding	exon	-7.73185	0.000232537	0.0163415	FALSE
YJL124C	LSM1	protein_coding	5UTR	-2.22781	0.000233007	0.0167511	FALSE
YOR007C	SGT2	protein_coding	3UTR	-1.7926	0.000234715	0.0037752	TRUE
YER053C	PIC2	protein_coding	3UTR	-7.74325	0.000234951	0.0104312	FALSE
YOL012C	HTZ1	protein_coding	3UTR	-2.01141	0.000235016	0.0165957	FALSE
YML123C	PHO84	protein_coding	exon	-7.73504	0.000235505	0.0280092	FALSE
YNL140C	YNL140C	protein_coding	5UTR	-7.73663	0.000236026	0.0280559	FALSE
YJR123W	RPS5	protein_coding	exon	1.05335	0.000237309	0.00380588	TRUE
YGR231C	PHB2	protein_coding	3UTR	-1.62978	0.00023825	0.00634674	TRUE
YNL161W	CBK1	protein_coding	3UTR	-3.00582	0.000238493	0.00862234	TRUE
YKL039W	PTM1	protein_coding	3UTR	-7.73346	0.00023969	0.0152241	FALSE
YNR020C	ATP23	protein_coding	3UTR	-2.76771	0.000241268	0.0167975	FALSE
YIL127C	RRT14	protein_coding	exon	2.08743	0.000242775	0.00895838	TRUE
YPR043W	RPL43A	protein_coding	exon	-0.860104	0.000242927	0.00427235	FALSE
YGR103W	NOP7	protein_coding	3UTR	-2.92721	0.000243331	0.00745943	TRUE
YHR182C-A	YHR182C-A	protein_coding	exon	1.79038	0.000244325	0.00482606	TRUE
YJL127C-B	YJL127C-B	protein_coding	exon	-7.73346	0.00024508	0.0161548	FALSE
YCL009C	ILV6	protein_coding	exon	2.4711	0.000245676	0.00712792	TRUE
YDR166C	SEC5	protein_coding	3UTR	-3.40154	0.00024604	0.0100998	FALSE
YIL062C	ARC15	protein_coding	exon	-1.26163	0.000246734	0.00456391	TRUE
YPR149W	NCE102	protein_coding	3UTR	-4.14386	0.000247706	0.0532583	FALSE
YDR167W	TAF10	protein_coding	3UTR	-7.73347	0.000248237	0.0158984	FALSE
YMR022W	UBC7	protein_coding	exon	-2.51913	0.000248453	0.010711	FALSE
YPL231W	FAS2	protein_coding	3UTR	-1.59775	0.000248718	0.00679323	TRUE
YDL054C	MCH1	protein_coding	3UTR	-7.73662	0.000248916	0.0163488	FALSE
YNL135C	FPR1	protein_coding	5UTR	-2.02757	0.000249256	0.00914625	TRUE
YEL031W	SPF1	protein_coding	exon	3.01662	0.00025017	0.0066725	TRUE
YOR187W	TUF1	protein_coding	3UTR	-2.39135	0.000250189	0.008934	TRUE
YDL150W	RPC53	protein_coding	3UTR	-3.00206	0.000250504	0.0172854	FALSE
YOR096W	RPS7A	protein_coding	exon	-1.33662	0.000250673	0.00437111	TRUE
YKL172W	EBP2	protein_coding	exon	1.1258	0.000250788	0.00389522	TRUE
YGR150C	CCM1	protein_coding	3UTR	-3.00734	0.000250803	0.0173006	FALSE
YKL087C	CYT2	protein_coding	3UTR	-3.39488	0.000251331	0.0157725	FALSE
YOR185C	GSP2	protein_coding	exon	-3.00281	0.000252148	0.0174858	FALSE
YER091C	MET6	protein_coding	exon	3.0732	0.000252875	0.00741684	TRUE
YLR448W	RPL6B	protein_coding	3UTR	-2.11696	0.000252901	0.0197994	FALSE
YKR051W	YKR051W	protein_coding	exon	-7.73818	0.000253924	0.0161587	FALSE
YGL062W	PYC1	protein_coding	exon	-3.29778	0.000254464	0.00729684	TRUE
YPL094C	SEC62	protein_coding	exon	-1.00538	0.000254571	0.00400307	TRUE
YGR245C	SDA1	protein_coding	3UTR	-1.727	0.000254667	0.0072949	TRUE
YIL101C	XBP1	protein_coding	3UTR	-7.73974	0.000255366	0.0344323	FALSE
YLR250W	SSP120	protein_coding	3UTR	-4.03465	0.000255675	0.0121662	FALSE
YPL200W	CSM4	protein_coding	3UTR	-3.29421	0.000256197	0.00927701	TRUE
YDR238C	SEC26	protein_coding	exon	2.43614	0.000256314	0.00727204	TRUE
YNR050C	LYS9	protein_coding	exon	-1.15064	0.000256902	0.0040359	TRUE
YLR325C	RPL38	protein_coding	3UTR	-3.40001	0.00025725	0.0163297	FALSE
YJL189W	RPL39	protein_coding	3UTR	-4.02721	0.000257931	0.0118746	FALSE
YMR205C	PFK2	protein_coding	3UTR	-2.69208	0.000258579	0.00942067	TRUE
YDR188W	CCT6	protein_coding	3UTR	-2.25173	0.000259279	0.00741394	TRUE
YKL081W	TEF4	protein_coding	exon	2.0791	0.000259888	0.00409244	TRUE
YLR099W-A	MIM2	protein_coding	5UTR	1.44942	0.000260343	0.00704196	TRUE
YNR027W	BUD17	protein_coding	3UTR	-7.73192	0.0002606	0.0176424	FALSE
YPL118W	MRP51	protein_coding	exon	-2.67309	0.000260933	0.00788277	TRUE
YIL131C	FKH1	protein_coding	3UTR	-3.01099	0.000261166	0.0178174	FALSE
YNR074C	AIF1	protein_coding	exon	-7.73349	0.000261212	0.0165224	FALSE
YKR058W	GLG1	protein_coding	exon	-7.74286	0.000261425	0.0330531	FALSE
YDR063W	AIM7	protein_coding	exon	-2.09307	0.000261654	0.0107771	FALSE
YNR050C	LYS9	protein_coding	3UTR	-1.2348	0.000261891	0.00467672	TRUE
YML027W	YOX1	protein_coding	3UTR	-4.02037	0.000262241	0.0114825	FALSE
YNL274C	GOR1	protein_coding	exon	-7.73505	0.000263343	0.0166268	FALSE
YIL162W	SUC2	protein_coding	exon	2.28918	0.000263361	0.00754977	TRUE
YOR309C	YOR309C	protein_coding	exon	-0.885081	0.00026348	0.00426523	FALSE
YBR162C	TOS1	protein_coding	exon	1.91573	0.00026394	0.00480593	TRUE
YBR066C	NRG2	protein_coding	3UTR	-7.7366	0.000264913	0.016927	FALSE
YHR077C	NMD2	protein_coding	exon	-1.57198	0.000265281	0.00754703	TRUE
YNL291C	MID1	protein_coding	3UTR	-2.37748	0.000265534	0.0131334	FALSE
YLR343W	GAS2	protein_coding	3UTR	-2.33307	0.00026638	0.00699567	TRUE
YER021W	RPN3	protein_coding	3UTR	-7.73505	0.000266911	0.0176608	FALSE
YOR071C	NRT1	protein_coding	3UTR	-7.73193	0.000268024	0.0168357	FALSE
YNL150W	YNL150W	protein_coding	exon	1.27754	0.00026866	0.00522446	TRUE
YGR108W	CLB1	protein_coding	3UTR	-7.7366	0.000270361	0.0171944	FALSE
YNL287W	SEC21	protein_coding	exon	2.44042	0.000271432	0.00761058	TRUE
YDR206W	EBS1	protein_coding	3UTR	-7.73505	0.000272491	0.0170417	FALSE
YFL007W	BLM10	protein_coding	exon	7.91708	0.00027285	0.0114825	FALSE
snR17a	snR17a	snoRNA	exon	0.8935	0.000273582	0.00426372	FALSE
YAL044W-A	BOL1	protein_coding	3UTR	-0.969273	0.000273746	0.0042443	FALSE
YNL268W	LYP1	protein_coding	exon	7.85161	0.000274132	0.0124581	FALSE
YOL005C	RPB11	protein_coding	exon	-1.00479	0.000274386	0.00425067	TRUE
YGR267C	FOL2	protein_coding	3UTR	-7.56114	0.000274432	0.00780146	TRUE
YHR021C	RPS27B	protein_coding	3UTR	-1.45707	0.000274501	0.00430998	TRUE
YLR435W	TSR2	protein_coding	3UTR	-7.73505	0.000276808	0.0175043	FALSE
YER043C	SAH1	protein_coding	exon	1.44232	0.00027681	0.00442591	TRUE
YGL147C	RPL9A	protein_coding	exon	-0.983162	0.000277053	0.00471734	FALSE
YER044C	ERG28	protein_coding	3UTR	-7.73194	0.000278018	0.0167822	FALSE
YBR029C	CDS1	protein_coding	3UTR	-7.73349	0.000278814	0.0168194	FALSE
YLR347C	KAP95	protein_coding	3UTR	-7.73349	0.000279002	0.0170466	FALSE
YBR069C	TAT1	protein_coding	3UTR	-7.55928	0.000279821	0.00999421	TRUE
YKR092C	SRP40	protein_coding	3UTR	-4.03299	0.000280373	0.0156155	FALSE
YKL206C	ADD66	protein_coding	3UTR	-2.9253	0.00028039	0.00788723	TRUE
YMR128W	ECM16	protein_coding	exon	1.51284	0.000280814	0.00747753	TRUE
YNL208W	YNL208W	protein_coding	exon	1.18294	0.000281143	0.00426523	TRUE
YER102W	RPS8B	protein_coding	5UTR	1.07904	0.00028122	0.00448056	TRUE
YAL019W	FUN30	protein_coding	3UTR	-2.11003	0.000281367	0.0125182	FALSE
YGR061C	ADE6	protein_coding	exon	-1.19866	0.000281477	0.00498471	TRUE
YDR308C	SRB7	protein_coding	3UTR	-7.73349	0.000282374	0.0177491	FALSE
YDR034C	LYS14	protein_coding	5UTR	-7.73505	0.000282721	0.0174039	FALSE
YCR028C-A	RIM1	protein_coding	3UTR	-2.66458	0.000283024	0.00800117	TRUE
YGL040C	HEM2	protein_coding	exon	-1.92627	0.000283047	0.0080602	TRUE
YER148W	SPT15	protein_coding	exon	-1.8812	0.000283572	0.00796412	TRUE
YMR073C	IRC21	protein_coding	5UTR	-4.03624	0.00028424	0.015786	FALSE
YDR480W	DIG2	protein_coding	3UTR	-7.72884	0.000284399	0.0175981	FALSE
YDR513W	GRX2	protein_coding	exon	-1.5555	0.000285167	0.00431201	TRUE
YDR195W	REF2	protein_coding	exon	7.94701	0.000285475	0.0173547	FALSE
YEL056W	HAT2	protein_coding	3UTR	3.01673	0.000285528	0.00738916	TRUE
YER136W	GDI1	protein_coding	3UTR	-7.72884	0.000285932	0.0173814	FALSE
YKR052C	MRS4	protein_coding	3UTR	-7.73816	0.000286639	0.0586423	FALSE
YGL069C	YGL069C	protein_coding	5UTR	-4.02415	0.000286685	0.0158923	FALSE
YHR195W	NVJ1	protein_coding	exon	-7.74128	0.000286725	0.044514	FALSE
YJL052W	TDH1	protein_coding	3UTR	-7.56863	0.000287142	0.013962	FALSE
YKL186C	MTR2	protein_coding	3UTR	-7.73505	0.000287231	0.0176046	FALSE
YLR094C	GIS3	protein_coding	exon	7.93225	0.000287501	0.0194599	FALSE
YBR247C	ENP1	protein_coding	exon	1.67319	0.000287887	0.00743919	TRUE
YDR177W	UBC1	protein_coding	3UTR	-7.73505	0.0002888	0.0589253	FALSE
YOR340C	RPA43	protein_coding	exon	1.59757	0.000288902	0.00745943	TRUE
YOL005C	RPB11	protein_coding	3UTR	-1.00368	0.000289015	0.00448028	TRUE
YOR198C	BFR1	protein_coding	3UTR	-3.29512	0.000289799	0.0129885	FALSE
YJL078C	PRY3	protein_coding	3UTR	-2.52693	0.000290196	0.0130009	FALSE
YLL009C	COX17	protein_coding	3UTR	-4.15053	0.000290636	1	FALSE
YBR262C	YBR262C	protein_coding	3UTR	-1.71438	0.000291235	0.00817157	TRUE
YLR355C	ILV5	protein_coding	exon	0.982768	0.00029228	0.00452094	FALSE
YLR413W	INA1	protein_coding	3UTR	-4.02754	0.000292286	0.0211521	FALSE
YLR192C	HCR1	protein_coding	exon	1.21119	0.000292687	0.00446179	TRUE
YLR353W	BUD8	protein_coding	3UTR	-2.4439	0.000293138	0.00810497	TRUE
YNR002C	ATO2	protein_coding	5UTR	-3.00144	0.000294265	0.0180519	FALSE
YCL031C	RRP7	protein_coding	exon	1.64767	0.000294511	0.00655473	TRUE
YNL274C	GOR1	protein_coding	5UTR	-3.01815	0.000295873	0.0175837	FALSE
YBL009W	ALK2	protein_coding	exon	7.91744	0.000296144	0.019637	FALSE
YDR202C	RAV2	protein_coding	3UTR	-7.73661	0.000296513	0.0356686	FALSE
[truncated: 15,083 more rows]
