# Supplementary material for: Small non-coding RNA Interactome Capture reveals pervasive, carbon source-dependent tRNA engagement of yeast glycolytic enzymes
Source: bioRxiv preprint, doi:10.1101/2022.07.14.500110, version 1 (2022-07-14)
Supplement: Table 3_snRIC2C_Limma results [file 500110_file05.xlsx]

## Sheet: Limma_results_V1
	gene_name	protein_id	description	found.in.files	found.in.file_rep1_merged_results_20191018_1328_proteins.txt	found.in.file_rep2_merged_results_20191018_1327_proteins.txt	found.in.file_rep3_merged_results_20191021_1002_proteins.txt	found.in.conditions	found.in.reps	max.qupm	average.top3	logFC	AveExpr	t	pvalue.limma	fdr.limma	B	pvalue.fdrtool	qval.fdrtool	lfdr.fdrtool	comparison	hit_annotation_method	pvalue	fdr	hit	hit_annotation	top3	short.hits	total.hits	long.binders
1	SUP45	P12385	Eukaryotic peptide chain release factor subunit 1 OS=Saccharomyces cerevisiae (strain ATCC 204508 / S288c) GN=SUP45 PE=1 SV=2	3	1	1	1	6	3	12	6.71163	5.43123	22.6888	30.4469	2.28597e-14	7.31045e-12	22.8209	0.835767	0.74182	0.74182	Total_CL - Total_NoCL	limma	2.28597e-14	7.31045e-12	TRUE	enriched hit	6.71163	TRUE	TRUE	FALSE
2	RPS18A|RPS18B	P0CX55|P0CX56	40S ribosomal protein S18-A OS=Saccharomyces cerevisiae (strain ATCC 204508 / S288c) GN=RPS18A PE=1 SV=1|40S ribosomal protein S18-B OS=Saccharomyces cerevisiae (strain ATCC 204508 / S288c) GN=RPS18B PE=1 SV=1	3	1	1	1	6	3	9	7.43269	4.82265	23.1172	30.4207	2.31379e-14	7.31045e-12	22.8107	0.835906	0.74182	0.74182	Total_CL - Total_NoCL	limma	2.31379e-14	7.31045e-12	TRUE	enriched hit	7.43269	TRUE	TRUE	FALSE
3	RPL2A|RPL2B	P0CX45|P0CX46	60S ribosomal protein L2-A OS=Saccharomyces cerevisiae (strain ATCC 204508 / S288c) GN=RPL2A PE=1 SV=1|60S ribosomal protein L2-B OS=Saccharomyces cerevisiae (strain ATCC 204508 / S288c) GN=RPL2B PE=1 SV=1	3	1	1	1	6	3	21	9.00207	5.75339	24.6778	29.9111	2.93302e-14	7.31045e-12	22.6095	0.838617	0.74182	0.74182	Total_CL - Total_NoCL	limma	2.93302e-14	7.31045e-12	TRUE	enriched hit	9.00207	FALSE	TRUE	TRUE
4	GCD14	P46959	tRNA (adenine(58)-N(1))-methyltransferase catalytic subunit TRM61 OS=Saccharomyces cerevisiae (strain ATCC 204508 / S288c) GN=GCD14 PE=1 SV=1	3	1	1	1	6	3	8	6.67015	6.35237	21.474	29.5513	3.47578e-14	7.31045e-12	22.4647	0.840532	0.74182	0.74182	Total_CL - Total_NoCL	limma	3.47578e-14	7.31045e-12	TRUE	enriched hit	6.67015	TRUE	TRUE	FALSE
5	RLP24	Q07915	Ribosome biogenesis protein RLP24 OS=Saccharomyces cerevisiae (strain ATCC 204508 / S288c) GN=RLP24 PE=1 SV=1	2	1	1	NA	6	2	2	6.53683	5.5539	20.2531	29.3163	3.88764e-14	7.31045e-12	22.0486	0.841784	0.74182	0.74182	Total_CL - Total_NoCL	limma	3.88764e-14	7.31045e-12	TRUE	enriched hit	6.53683	FALSE	TRUE	TRUE
6	SES1	P07284	Serine--tRNA ligase, cytoplasmic OS=Saccharomyces cerevisiae (strain ATCC 204508 / S288c) GN=SES1 PE=1 SV=2	3	1	1	1	6	3	21	7.68999	6.19569	24.2269	29.2231	4.06513e-14	7.31045e-12	22.3304	0.84228	0.74182	0.74182	Total_CL - Total_NoCL	limma	4.06513e-14	7.31045e-12	TRUE	enriched hit	7.68999	TRUE	TRUE	FALSE
7	RPL14A|RPL14B	P36105|P38754	60S ribosomal protein L14-A OS=Saccharomyces cerevisiae (strain ATCC 204508 / S288c) GN=RPL14A PE=1 SV=1|60S ribosomal protein L14-B OS=Saccharomyces cerevisiae (strain ATCC 204508 / S288c) GN=RPL14B PE=1 SV=1	3	1	1	1	6	3	6	7.58434	6.12009	22.8312	28.5287	5.69491e-14	8.7783e-12	22.0396	0.84598	0.74182	0.74182	Total_CL - Total_NoCL	limma	5.69491e-14	8.7783e-12	TRUE	enriched hit	7.58434	TRUE	TRUE	FALSE
8	RPL20A|RPL20B	P0CX23|P0CX24	60S ribosomal protein L20-A OS=Saccharomyces cerevisiae (strain ATCC 204508 / S288c) GN=RPL20A PE=1 SV=1|60S ribosomal protein L20-B OS=Saccharomyces cerevisiae (strain ATCC 204508 / S288c) GN=RPL20B PE=1 SV=1	3	1	1	1	6	3	11	8.25025	5.27262	23.9729	28.1944	6.7174e-14	9.0601e-12	21.8961	0.847763	0.74182	0.74182	Total_CL - Total_NoCL	limma	6.7174e-14	9.0601e-12	TRUE	enriched hit	8.25025	FALSE	TRUE	TRUE
9	RPS24A|RPS24B	P0CX31|P0CX32	40S ribosomal protein S24-A OS=Saccharomyces cerevisiae (strain ATCC 204508 / S288c) GN=RPS24A PE=1 SV=1|40S ribosomal protein S24-B OS=Saccharomyces cerevisiae (strain ATCC 204508 / S288c) GN=RPS24B PE=1 SV=1	3	1	1	1	6	3	11	8.7759	8.3543	22.9879	27.8519	7.97126e-14	9.26855e-12	21.7468	0.84959	0.74182	0.74182	Total_CL - Total_NoCL	limma	7.97126e-14	9.26855e-12	TRUE	enriched hit	8.7759	TRUE	TRUE	FALSE
10	TMA20	P89886	Translation machinery-associated protein 20 OS=Saccharomyces cerevisiae (strain ATCC 204508 / S288c) GN=TMA20 PE=1 SV=1	2	1	NA	1	5	2	3	5.92851	4.7788	20.5666	27.7036	8.58995e-14	9.26855e-12	21.3965	0.850381	0.74182	0.74182	Total_CL - Total_NoCL	limma	8.58995e-14	9.26855e-12	TRUE	enriched hit	5.92851	TRUE	TRUE	FALSE
11	RPL39	P04650	60S ribosomal protein L39 OS=Saccharomyces cerevisiae (strain ATCC 204508 / S288c) GN=RPL39 PE=1 SV=3	2	1	1	NA	6	2	3	7.31447	6.22012	20.5768	27.321	1.04356e-13	1.02364e-11	20.8835	0.852424	0.74182	0.74182	Total_CL - Total_NoCL	limma	1.04356e-13	1.02364e-11	TRUE	enriched hit	7.31447	TRUE	TRUE	FALSE
12	RPL8B	P29453	60S ribosomal protein L8-B OS=Saccharomyces cerevisiae (strain ATCC 204508 / S288c) GN=RPL8B PE=1 SV=3	3	1	1	1	6	3	2	7.59004	7.74174	21.0087	27.1462	1.14162e-13	1.0265e-11	21.4314	0.853357	0.74182	0.74182	Total_CL - Total_NoCL	limma	1.14162e-13	1.0265e-11	TRUE	enriched hit	7.59004	TRUE	TRUE	FALSE
13	NOP12	Q08208	Nucleolar protein 12 OS=Saccharomyces cerevisiae (strain ATCC 204508 / S288c) GN=NOP12 PE=1 SV=1	3	1	1	1	6	3	8	6.40316	4.74143	22.3738	26.5934	1.52218e-13	1.26341e-11	21.1767	0.856311	0.74182	0.74182	Total_CL - Total_NoCL	limma	1.52218e-13	1.26341e-11	TRUE	enriched hit	6.40316	FALSE	TRUE	TRUE
14	RPS2	P25443	40S ribosomal protein S2 OS=Saccharomyces cerevisiae (strain ATCC 204508 / S288c) GN=RPS2 PE=1 SV=3	3	1	1	1	6	3	10	7.74817	5.16503	23.0456	26.1945	1.88012e-13	1.35867e-11	20.9887	0.858443	0.74182	0.74182	Total_CL - Total_NoCL	limma	1.88012e-13	1.35867e-11	TRUE	enriched hit	7.74817	FALSE	TRUE	TRUE
15	RPL21A|RPL21B	Q02753|Q12672	60S ribosomal protein L21-A OS=Saccharomyces cerevisiae (strain ATCC 204508 / S288c) GN=RPL21A PE=1 SV=1|60S ribosomal protein L21-B OS=Saccharomyces cerevisiae (strain ATCC 204508 / S288c) GN=RPL21B PE=1 SV=1	3	1	1	1	6	3	6	7.66185	5.61534	23.2034	26.0782	2.00076e-13	1.35867e-11	20.9331	0.859065	0.74182	0.74182	Total_CL - Total_NoCL	limma	2.00076e-13	1.35867e-11	TRUE	enriched hit	7.66185	FALSE	TRUE	TRUE
16	RPS3	P05750	40S ribosomal protein S3 OS=Saccharomyces cerevisiae (strain ATCC 204508 / S288c) GN=RPS3 PE=1 SV=5	3	1	1	1	6	3	14	8.02444	6.3136	23.7969	26.0652	2.01471e-13	1.35867e-11	20.9269	0.859134	0.74182	0.74182	Total_CL - Total_NoCL	limma	2.01471e-13	1.35867e-11	TRUE	enriched hit	8.02444	TRUE	TRUE	FALSE
17	TMA64	Q04600	Translation machinery-associated protein 64 OS=Saccharomyces cerevisiae (strain ATCC 204508 / S288c) GN=TMA64 PE=1 SV=1	3	1	1	1	6	3	9	6.49129	5.76614	22.822	25.6523	2.51797e-13	1.59817e-11	20.7271	0.861343	0.74182	0.74182	Total_CL - Total_NoCL	limma	2.51797e-13	1.59817e-11	TRUE	enriched hit	6.49129	TRUE	TRUE	FALSE
18	EGD1	Q02642	Nascent polypeptide-associated complex subunit beta-1 OS=Saccharomyces cerevisiae (strain ATCC 204508 / S288c) GN=EGD1 PE=1 SV=2	3	1	1	1	6	3	8	6.94547	5.08969	22.3194	25.2258	3.18167e-13	1.90724e-11	20.5163	0.863626	0.74182	0.74182	Total_CL - Total_NoCL	limma	3.18167e-13	1.90724e-11	TRUE	enriched hit	6.94547	TRUE	TRUE	FALSE
19	MRPS35	P53292	37S ribosomal protein S35, mitochondrial OS=Saccharomyces cerevisiae (strain ATCC 204508 / S288c) GN=MRPS35 PE=1 SV=1	3	1	1	1	6	3	6	6.20683	5.85413	20.7431	25.0556	3.49666e-13	1.90786e-11	20.4015	0.864537	0.74182	0.74182	Total_CL - Total_NoCL	limma	3.49666e-13	1.90786e-11	TRUE	enriched hit	6.20683	FALSE	TRUE	TRUE
20	DBP2	P24783	ATP-dependent RNA helicase DBP2 OS=Saccharomyces cerevisiae (strain ATCC 204508 / S288c) GN=DBP2 PE=1 SV=1	3	1	1	1	6	3	17	7.05881	4.38582	22.8607	25.0353	3.53634e-13	1.90786e-11	20.4208	0.864645	0.74182	0.74182	Total_CL - Total_NoCL	limma	3.53634e-13	1.90786e-11	TRUE	enriched hit	7.05881	FALSE	TRUE	TRUE
21	XRN1	P22147	5'-3' exoribonuclease 1 OS=Saccharomyces cerevisiae (strain ATCC 204508 / S288c) GN=XRN1 PE=1 SV=1	3	1	1	1	6	3	37	6.88662	4.28256	24.5089	24.8204	3.98807e-13	1.99901e-11	20.3118	0.865796	0.74182	0.74182	Total_CL - Total_NoCL	limma	3.98807e-13	1.99901e-11	TRUE	enriched hit	6.88662	FALSE	TRUE	TRUE
22	EFT1	P32324	Elongation factor 2 OS=Saccharomyces cerevisiae (strain ATCC 204508 / S288c) GN=EFT1 PE=1 SV=1	3	1	1	1	6	3	36	7.96538	3.75373	25.3995	24.6987	4.27094e-13	1.99901e-11	20.2496	0.866448	0.74182	0.74182	Total_CL - Total_NoCL	limma	4.27094e-13	1.99901e-11	TRUE	enriched hit	7.96538	FALSE	TRUE	TRUE
23	RPS14B	P39516	40S ribosomal protein S14-B OS=Saccharomyces cerevisiae (strain ATCC 204508 / S288c) GN=RPS14B PE=1 SV=2	3	1	1	1	6	3	7	7.37602	4.76298	23.0018	24.6424	4.40887e-13	1.99901e-11	20.2207	0.86675	0.74182	0.74182	Total_CL - Total_NoCL	limma	4.40887e-13	1.99901e-11	TRUE	enriched hit	7.37602	FALSE	TRUE	TRUE
24	DPS1	P04802	Aspartate--tRNA ligase, cytoplasmic OS=Saccharomyces cerevisiae (strain ATCC 204508 / S288c) GN=DPS1 PE=1 SV=3	3	1	1	1	6	3	26	7.41003	3.94809	25.0857	24.6275	4.44636e-13	1.99901e-11	20.213	0.86683	0.74182	0.74182	Total_CL - Total_NoCL	limma	4.44636e-13	1.99901e-11	TRUE	enriched hit	7.41003	TRUE	TRUE	FALSE
25	RBG1	P39729	Ribosome-interacting GTPase 1 OS=Saccharomyces cerevisiae (strain ATCC 204508 / S288c) GN=RBG1 PE=1 SV=1	3	1	1	1	6	3	8	6.41449	4.52478	21.6267	24.2855	5.40266e-13	2.22373e-11	20.0355	0.868662	0.74182	0.74182	Total_CL - Total_NoCL	limma	5.40266e-13	2.22373e-11	TRUE	enriched hit	6.41449	TRUE	TRUE	FALSE
26	GBP2	P25555	Single-strand telomeric DNA-binding protein GBP2 OS=Saccharomyces cerevisiae (strain ATCC 204508 / S288c) GN=GBP2 PE=1 SV=1	3	1	1	1	6	3	12	7.11672	5.20702	23.1715	24.285	5.40402e-13	2.22373e-11	20.0353	0.868664	0.74182	0.74182	Total_CL - Total_NoCL	limma	5.40402e-13	2.22373e-11	TRUE	enriched hit	7.11672	TRUE	TRUE	FALSE
27	SCP160	P06105	Protein SCP160 OS=Saccharomyces cerevisiae (strain ATCC 204508 / S288c) GN=SCP160 PE=1 SV=3	3	1	1	1	6	3	55	7.6034	4.82025	25.6894	24.2341	5.56449e-13	2.22373e-11	20.0085	0.868938	0.74182	0.74182	Total_CL - Total_NoCL	limma	5.56449e-13	2.22373e-11	TRUE	enriched hit	7.6034	FALSE	TRUE	TRUE
28	PNO1	Q99216	Pre-rRNA-processing protein PNO1 OS=Saccharomyces cerevisiae (strain ATCC 204508 / S288c) GN=PNO1 PE=1 SV=1	3	1	1	1	6	3	5	6.48778	4.58928	22.0348	24.0896	6.04762e-13	2.33049e-11	19.9324	0.869712	0.74182	0.74182	Total_CL - Total_NoCL	limma	6.04762e-13	2.33049e-11	TRUE	enriched hit	6.48778	FALSE	TRUE	TRUE
29	RPS20	P38701	40S ribosomal protein S20 OS=Saccharomyces cerevisiae (strain ATCC 204508 / S288c) GN=RPS20 PE=1 SV=3	3	1	1	1	6	3	7	7.62585	6.42996	22.2424	23.9196	6.67425e-13	2.35944e-11	19.5994	0.870623	0.74182	0.74182	Total_CL - Total_NoCL	limma	6.67425e-13	2.35944e-11	TRUE	enriched hit	7.62585	TRUE	TRUE	FALSE
30	RPL6A	Q02326	60S ribosomal protein L6-A OS=Saccharomyces cerevisiae (strain ATCC 204508 / S288c) GN=RPL6A PE=1 SV=2	3	1	1	1	6	3	8	8.63229	8.14854	23.3541	23.7927	7.18688e-13	2.35944e-11	19.7742	0.871303	0.74182	0.74182	Total_CL - Total_NoCL	limma	7.18688e-13	2.35944e-11	TRUE	enriched hit	8.63229	FALSE	TRUE	TRUE
31	TIF1	P10081	ATP-dependent RNA helicase eIF4A OS=Saccharomyces cerevisiae (strain ATCC 204508 / S288c) GN=TIF1 PE=1 SV=3	3	1	1	1	6	3	18	7.54288	5.18637	23.8877	23.7831	7.22758e-13	2.35944e-11	19.769	0.871355	0.74182	0.74182	Total_CL - Total_NoCL	limma	7.22758e-13	2.35944e-11	TRUE	enriched hit	7.54288	TRUE	TRUE	FALSE
32	RPS10B|RPS10A	P46784|Q08745	40S ribosomal protein S10-B OS=Saccharomyces cerevisiae (strain ATCC 204508 / S288c) GN=RPS10B PE=1 SV=1|40S ribosomal protein S10-A OS=Saccharomyces cerevisiae (strain ATCC 204508 / S288c) GN=RPS10A PE=1 SV=1	3	1	1	1	6	3	5	7.36627	5.2193	22.3921	23.7146	7.52312e-13	2.35944e-11	19.7322	0.871722	0.74182	0.74182	Total_CL - Total_NoCL	limma	7.52312e-13	2.35944e-11	TRUE	enriched hit	7.36627	TRUE	TRUE	FALSE
33	RPL6B	P05739	60S ribosomal protein L6-B OS=Saccharomyces cerevisiae (strain ATCC 204508 / S288c) GN=RPL6B PE=1 SV=4	3	1	1	1	6	3	8	8.97602	7.99758	23.8522	23.6964	7.60421e-13	2.35944e-11	19.7223	0.87182	0.74182	0.74182	Total_CL - Total_NoCL	limma	7.60421e-13	2.35944e-11	TRUE	enriched hit	8.97602	FALSE	TRUE	TRUE
34	SCD6	P45978	Protein SCD6 OS=Saccharomyces cerevisiae (strain ATCC 204508 / S288c) GN=SCD6 PE=1 SV=1	3	1	1	1	6	3	5	5.96581	4.78967	20.218	23.6892	7.63633e-13	2.35944e-11	19.4424	0.871859	0.74182	0.74182	Total_CL - Total_NoCL	limma	7.63633e-13	2.35944e-11	TRUE	enriched hit	5.96581	TRUE	TRUE	FALSE
35	RPL18A|RPL18B	P0CX49|P0CX50	60S ribosomal protein L18-A OS=Saccharomyces cerevisiae (strain ATCC 204508 / S288c) GN=RPL18A PE=1 SV=1|60S ribosomal protein L18-B OS=Saccharomyces cerevisiae (strain ATCC 204508 / S288c) GN=RPL18B PE=1 SV=1	3	1	1	1	6	3	10	7.71526	4.56796	23.9056	23.6854	7.65341e-13	2.35944e-11	19.7164	0.871879	0.74182	0.74182	Total_CL - Total_NoCL	limma	7.65341e-13	2.35944e-11	TRUE	enriched hit	7.71526	TRUE	TRUE	FALSE
36	DED1	P06634	ATP-dependent RNA helicase DED1 OS=Saccharomyces cerevisiae (strain ATCC 204508 / S288c) GN=DED1 PE=1 SV=2	3	1	1	1	6	3	20	7.30759	4.61673	23.826	23.5946	8.07353e-13	2.41982e-11	19.6672	0.872366	0.74182	0.74182	Total_CL - Total_NoCL	limma	8.07353e-13	2.41982e-11	TRUE	enriched hit	7.30759	FALSE	TRUE	TRUE
37	RPS23A|RPS23B	P0CX29|P0CX30	40S ribosomal protein S23-A OS=Saccharomyces cerevisiae (strain ATCC 204508 / S288c) GN=RPS23A PE=1 SV=1|40S ribosomal protein S23-B OS=Saccharomyces cerevisiae (strain ATCC 204508 / S288c) GN=RPS23B PE=1 SV=1	3	1	1	1	6	3	7	7.48513	5.59982	22.3131	23.44	8.84644e-13	2.57981e-11	19.583	0.873195	0.74182	0.74182	Total_CL - Total_NoCL	limma	8.84644e-13	2.57981e-11	TRUE	enriched hit	7.48513	TRUE	TRUE	FALSE
38	GUK1	P15454	Guanylate kinase OS=Saccharomyces cerevisiae (strain ATCC 204508 / S288c) GN=GUK1 PE=1 SV=2	2	1	1	NA	6	2	3	5.92249	4.8913	20.5726	23.0316	1.12945e-12	3.20704e-11	19.2043	0.875386	0.74182	0.74182	Total_CL - Total_NoCL	limma	1.12945e-12	3.20704e-11	TRUE	enriched hit	5.92249	TRUE	TRUE	FALSE
39	NOP1	P15646	rRNA 2'-O-methyltransferase fibrillarin OS=Saccharomyces cerevisiae (strain ATCC 204508 / S288c) GN=NOP1 PE=1 SV=1	3	1	1	1	6	3	6	6.79345	4.37797	22.7977	22.9085	1.21674e-12	3.3411e-11	19.2883	0.876047	0.74182	0.74182	Total_CL - Total_NoCL	limma	1.21674e-12	3.3411e-11	TRUE	enriched hit	6.79345	FALSE	TRUE	TRUE
40	MCK1	P21965	Protein kinase MCK1 OS=Saccharomyces cerevisiae (strain ATCC 204508 / S288c) GN=MCK1 PE=1 SV=1	3	1	1	1	6	3	3	5.73272	3.86289	19.6933	22.8791	1.23859e-12	3.3411e-11	19.1626	0.876205	0.74182	0.74182	Total_CL - Total_NoCL	limma	1.23859e-12	3.3411e-11	TRUE	enriched hit	5.73272	TRUE	TRUE	FALSE
41	RPL11A|RPL11B	P0C0W9|Q3E757	60S ribosomal protein L11-A OS=Saccharomyces cerevisiae (strain ATCC 204508 / S288c) GN=RPL11A PE=1 SV=2|60S ribosomal protein L11-B OS=Saccharomyces cerevisiae (strain ATCC 204508 / S288c) GN=RPL11B PE=1 SV=3	3	1	1	1	6	3	5	6.96031	5.27927	21.939	22.5922	1.47579e-12	3.8556e-11	19.1089	0.877745	0.74182	0.74182	Total_CL - Total_NoCL	limma	1.47579e-12	3.8556e-11	TRUE	enriched hit	6.96031	TRUE	TRUE	FALSE
42	SSZ1	P38788	Ribosome-associated complex subunit SSZ1 OS=Saccharomyces cerevisiae (strain ATCC 204508 / S288c) GN=SSZ1 PE=1 SV=2	3	1	1	1	6	3	13	7.12103	3.93483	24.1597	22.5622	1.50324e-12	3.8556e-11	19.0918	0.877906	0.74182	0.74182	Total_CL - Total_NoCL	limma	1.50324e-12	3.8556e-11	TRUE	enriched hit	7.12103	TRUE	TRUE	FALSE
43	TSA1	P34760	Peroxiredoxin TSA1 OS=Saccharomyces cerevisiae (strain ATCC 204508 / S288c) GN=TSA1 PE=1 SV=3	3	1	1	1	6	3	10	7.14818	4.41273	22.8755	22.5266	1.53652e-12	3.8556e-11	19.0714	0.878097	0.74182	0.74182	Total_CL - Total_NoCL	limma	1.53652e-12	3.8556e-11	TRUE	enriched hit	7.14818	TRUE	TRUE	FALSE
44	SYH1	Q02875	SMY2 homolog 2 OS=Saccharomyces cerevisiae (strain ATCC 204508 / S288c) GN=SYH1 PE=1 SV=1	3	1	1	1	6	3	4	5.64816	4.09982	19.6778	22.477	1.58427e-12	3.88506e-11	19.0303	0.878363	0.74182	0.74182	Total_CL - Total_NoCL	limma	1.58427e-12	3.88506e-11	TRUE	enriched hit	5.64816	FALSE	TRUE	TRUE
45	KRS1	P15180	Lysine--tRNA ligase, cytoplasmic OS=Saccharomyces cerevisiae (strain ATCC 204508 / S288c) GN=KRS1 PE=1 SV=2	3	1	1	1	6	3	21	7.40345	3.82307	24.5475	22.3881	1.67381e-12	4.01343e-11	18.9916	0.878841	0.74182	0.74182	Total_CL - Total_NoCL	limma	1.67381e-12	4.01343e-11	TRUE	enriched hit	7.40345	TRUE	TRUE	FALSE
46	RPS6A|RPS6B	P0CX37|P0CX38	40S ribosomal protein S6-A OS=Saccharomyces cerevisiae (strain ATCC 204508 / S288c) GN=RPS6A PE=1 SV=1|40S ribosomal protein S6-B OS=Saccharomyces cerevisiae (strain ATCC 204508 / S288c) GN=RPS6B PE=1 SV=1	3	1	1	1	6	3	13	8.23162	6.82867	23.5164	22.2363	1.83944e-12	4.27948e-11	18.9035	0.879656	0.74182	0.74182	Total_CL - Total_NoCL	limma	1.83944e-12	4.27948e-11	TRUE	enriched hit	8.23162	FALSE	TRUE	TRUE
47	RPL16A	P26784	60S ribosomal protein L16-A OS=Saccharomyces cerevisiae (strain ATCC 204508 / S288c) GN=RPL16A PE=1 SV=3	3	1	1	1	6	3	13	8.15377	6.70097	23.1726	22.215	1.86409e-12	4.27948e-11	18.8911	0.87977	0.74182	0.74182	Total_CL - Total_NoCL	limma	1.86409e-12	4.27948e-11	TRUE	enriched hit	8.15377	FALSE	TRUE	TRUE
48	MRN1	Q08925	RNA-binding protein MRN1 OS=Saccharomyces cerevisiae (strain ATCC 204508 / S288c) GN=MRN1 PE=1 SV=1	3	1	1	1	6	3	13	6.90184	5.77169	22.9173	22.1524	1.93852e-12	4.33716e-11	18.8545	0.880107	0.74182	0.74182	Total_CL - Total_NoCL	limma	1.93852e-12	4.33716e-11	TRUE	enriched hit	6.90184	FALSE	TRUE	TRUE
49	SSS1	P35179	Protein transport protein SSS1 OS=Saccharomyces cerevisiae (strain ATCC 204508 / S288c) GN=SSS1 PE=1 SV=2	3	1	1	1	6	3	3	6.42385	3.72493	21.9187	22.1063	1.99522e-12	4.33716e-11	18.8275	0.880354	0.74182	0.74182	Total_CL - Total_NoCL	limma	1.99522e-12	4.33716e-11	TRUE	enriched hit	6.42385	TRUE	TRUE	FALSE
50	MRD1	Q06106	Multiple RNA-binding domain-containing protein 1 OS=Saccharomyces cerevisiae (strain ATCC 204508 / S288c) GN=MRD1 PE=1 SV=1	3	1	1	1	6	3	16	6.6956	4.88862	23.1022	22.0947	2.0098e-12	4.33716e-11	18.8207	0.880416	0.74182	0.74182	Total_CL - Total_NoCL	limma	2.0098e-12	4.33716e-11	TRUE	enriched hit	6.6956	FALSE	TRUE	TRUE
51	ADO1	P47143	Adenosine kinase OS=Saccharomyces cerevisiae (strain ATCC 204508 / S288c) GN=ADO1 PE=1 SV=1	3	1	1	1	6	3	4	6.29028	3.67627	22.1897	21.9726	2.17038e-12	4.59185e-11	18.7487	0.881073	0.74182	0.74182	Total_CL - Total_NoCL	limma	2.17038e-12	4.59185e-11	TRUE	enriched hit	6.29028	TRUE	TRUE	FALSE
52	YLR419W	Q06698	Putative ATP-dependent RNA helicase YLR419W OS=Saccharomyces cerevisiae (strain ATCC 204508 / S288c) GN=YLR419W PE=1 SV=1	3	1	1	1	6	3	20	6.42981	5.17774	22.568	21.8657	2.32205e-12	4.81825e-11	18.6854	0.881647	0.74182	0.74182	Total_CL - Total_NoCL	limma	2.32205e-12	4.81825e-11	TRUE	enriched hit	6.42981	FALSE	TRUE	TRUE
53	YNR021W	P53723	UPF0674 endoplasmic reticulum membrane protein YNR021W OS=Saccharomyces cerevisiae (strain ATCC 204508 / S288c) GN=YNR021W PE=1 SV=3	3	1	1	1	6	3	5	6.49192	4.89976	21.3171	21.7754	2.45903e-12	5.00622e-11	18.6271	0.882132	0.74182	0.74182	Total_CL - Total_NoCL	limma	2.45903e-12	5.00622e-11	TRUE	enriched hit	6.49192	TRUE	TRUE	FALSE
54	SPE3	Q12074	Spermidine synthase OS=Saccharomyces cerevisiae (strain ATCC 204508 / S288c) GN=SPE3 PE=1 SV=1	3	1	1	1	6	3	5	6.15121	5.20839	21.0093	21.5484	2.84322e-12	5.68118e-11	18.4951	0.883352	0.74182	0.74182	Total_CL - Total_NoCL	limma	2.84322e-12	5.68118e-11	TRUE	enriched hit	6.15121	TRUE	TRUE	FALSE
55	IRC22	P40006	Increased recombination centers protein 22 OS=Saccharomyces cerevisiae (strain ATCC 204508 / S288c) GN=IRC22 PE=1 SV=1	2	1	NA	1	6	2	2	6.32383	4.43349	21.0975	21.4576	3.01423e-12	5.90887e-11	18.3194	0.88384	0.74182	0.74182	Total_CL - Total_NoCL	limma	3.01423e-12	5.90887e-11	TRUE	enriched hit	6.32383	TRUE	TRUE	FALSE
56	TRP2	P00899	Anthranilate synthase component 1 OS=Saccharomyces cerevisiae (strain ATCC 204508 / S288c) GN=TRP2 PE=1 SV=4	2	1	1	NA	6	2	4	5.73949	3.96079	20.9774	21.4165	3.09525e-12	5.90887e-11	18.2811	0.88406	0.74182	0.74182	Total_CL - Total_NoCL	limma	3.09525e-12	5.90887e-11	TRUE	enriched hit	5.73949	FALSE	TRUE	TRUE
57	ILS1	P09436	Isoleucine--tRNA ligase, cytoplasmic OS=Saccharomyces cerevisiae (strain ATCC 204508 / S288c) GN=ILS1 PE=1 SV=1	3	1	1	1	6	3	27	7.03146	4.09009	23.9966	21.4035	3.12146e-12	5.90887e-11	18.4072	0.884131	0.74182	0.74182	Total_CL - Total_NoCL	limma	3.12146e-12	5.90887e-11	TRUE	enriched hit	7.03146	TRUE	TRUE	FALSE
58	RPL3	P14126	60S ribosomal protein L3 OS=Saccharomyces cerevisiae (strain ATCC 204508 / S288c) GN=RPL3 PE=1 SV=4	3	1	1	1	6	3	19	7.56686	4.98511	24.3948	21.2737	3.3955e-12	6.3168e-11	18.3278	0.884828	0.74182	0.74182	Total_CL - Total_NoCL	limma	3.3955e-12	6.3168e-11	TRUE	enriched hit	7.56686	TRUE	TRUE	FALSE
59	SUB2	Q07478	ATP-dependent RNA helicase SUB2 OS=Saccharomyces cerevisiae (strain ATCC 204508 / S288c) GN=SUB2 PE=1 SV=1	3	1	1	1	6	3	11	6.76705	4.77598	22.8171	21.2377	3.47599e-12	6.35694e-11	18.3057	0.885022	0.74182	0.74182	Total_CL - Total_NoCL	limma	3.47599e-12	6.35694e-11	TRUE	enriched hit	6.76705	TRUE	TRUE	FALSE
60	KES1	P35844	Oxysterol-binding protein homolog 4 OS=Saccharomyces cerevisiae (strain ATCC 204508 / S288c) GN=KES1 PE=1 SV=1	2	1	1	NA	6	2	4	6.11828	3.33532	21.1364	21.1444	3.69425e-12	6.6435e-11	18.1337	0.885523	0.74182	0.74182	Total_CL - Total_NoCL	limma	3.69425e-12	6.6435e-11	TRUE	enriched hit	6.11828	TRUE	TRUE	FALSE
61	HOM2	P13663	Aspartate-semialdehyde dehydrogenase OS=Saccharomyces cerevisiae (strain ATCC 204508 / S288c) GN=HOM2 PE=1 SV=1	3	1	1	1	6	3	8	6.60066	3.65891	22.3415	21.0954	3.8148e-12	6.74781e-11	18.2178	0.885787	0.74182	0.74182	Total_CL - Total_NoCL	limma	3.8148e-12	6.74781e-11	TRUE	enriched hit	6.60066	TRUE	TRUE	FALSE
62	RPS4A|RPS4B	P0CX35|P0CX36	40S ribosomal protein S4-A OS=Saccharomyces cerevisiae (strain ATCC 204508 / S288c) GN=RPS4A PE=1 SV=1|40S ribosomal protein S4-B OS=Saccharomyces cerevisiae (strain ATCC 204508 / S288c) GN=RPS4B PE=1 SV=1	3	1	1	1	6	3	20	8.61098	5.84769	24.804	21.0576	3.9105e-12	6.80552e-11	18.1944	0.88599	0.74182	0.74182	Total_CL - Total_NoCL	limma	3.9105e-12	6.80552e-11	TRUE	enriched hit	8.61098	FALSE	TRUE	TRUE
63	CIC1	P38779	Proteasome-interacting protein CIC1 OS=Saccharomyces cerevisiae (strain ATCC 204508 / S288c) GN=CIC1 PE=1 SV=1	3	1	1	1	6	3	7	6.39635	4.23712	22.5906	20.9671	4.15033e-12	7.10827e-11	18.1381	0.886477	0.74182	0.74182	Total_CL - Total_NoCL	limma	4.15033e-12	7.10827e-11	TRUE	enriched hit	6.39635	FALSE	TRUE	TRUE
64	POM152	P39685	Nucleoporin POM152 OS=Saccharomyces cerevisiae (strain ATCC 204508 / S288c) GN=POM152 PE=1 SV=1	2	1	1	NA	5	2	5	5.42459	3.86191	20.4266	20.8031	4.62622e-12	7.66997e-11	17.9127	0.887359	0.74182	0.74182	Total_CL - Total_NoCL	limma	4.62622e-12	7.66997e-11	TRUE	enriched hit	5.42459	FALSE	TRUE	TRUE
65	RPL27A|RPL27B	P0C2H6|P0C2H7	60S ribosomal protein L27-A OS=Saccharomyces cerevisiae (strain ATCC 204508 / S288c) GN=RPL27A PE=1 SV=1|60S ribosomal protein L27-B OS=Saccharomyces cerevisiae (strain ATCC 204508 / S288c) GN=RPL27B PE=1 SV=1	3	1	1	1	6	3	6	7.19962	5.55099	22.4882	20.7965	4.64641e-12	7.66997e-11	18.031	0.887394	0.74182	0.74182	Total_CL - Total_NoCL	limma	4.64641e-12	7.66997e-11	TRUE	enriched hit	7.19962	FALSE	TRUE	TRUE
66	VAC8	P39968	Vacuolar protein 8 OS=Saccharomyces cerevisiae (strain ATCC 204508 / S288c) GN=VAC8 PE=1 SV=3	3	1	1	1	6	3	6	6.19772	3.49251	22.3751	20.7646	4.74615e-12	7.66997e-11	18.0109	0.887566	0.74182	0.74182	Total_CL - Total_NoCL	limma	4.74615e-12	7.66997e-11	TRUE	enriched hit	6.19772	FALSE	TRUE	TRUE
67	MSS116	P15424	ATP-dependent RNA helicase MSS116, mitochondrial OS=Saccharomyces cerevisiae (strain ATCC 204508 / S288c) GN=MSS116 PE=1 SV=1	3	1	1	1	6	3	15	6.48675	6.09115	21.9904	20.7594	4.76263e-12	7.66997e-11	18.0076	0.887594	0.74182	0.74182	Total_CL - Total_NoCL	limma	4.76263e-12	7.66997e-11	TRUE	enriched hit	6.48675	FALSE	TRUE	TRUE
68	BFR1	P38934	Nuclear segregation protein BFR1 OS=Saccharomyces cerevisiae (strain ATCC 204508 / S288c) GN=BFR1 PE=1 SV=1	3	1	1	1	6	3	29	7.29799	5.3053	24.6751	20.6357	5.17233e-12	8.1522e-11	17.9292	0.888259	0.74182	0.74182	Total_CL - Total_NoCL	limma	5.17233e-12	8.1522e-11	TRUE	enriched hit	7.29799	FALSE	TRUE	TRUE
69	ZUO1	P32527	Zuotin OS=Saccharomyces cerevisiae (strain ATCC 204508 / S288c) GN=ZUO1 PE=1 SV=1	3	1	1	1	6	3	10	6.81966	3.46227	23.6011	20.624	5.21317e-12	8.1522e-11	17.9218	0.888322	0.74182	0.74182	Total_CL - Total_NoCL	limma	5.21317e-12	8.1522e-11	TRUE	enriched hit	6.81966	FALSE	TRUE	TRUE
70	SPB1	P25582	27S pre-rRNA (guanosine(2922)-2'-O)-methyltransferase OS=Saccharomyces cerevisiae (strain ATCC 204508 / S288c) GN=SPB1 PE=1 SV=2	3	1	1	1	6	3	12	6.71553	4.13367	22.7381	20.4026	6.05048e-12	9.31609e-11	17.7801	0.889513	0.74182	0.74182	Total_CL - Total_NoCL	limma	6.05048e-12	9.31609e-11	TRUE	enriched hit	6.71553	FALSE	TRUE	TRUE
71	SCS7	Q03529	Ceramide very long chain fatty acid hydroxylase SCS7 OS=Saccharomyces cerevisiae (strain ATCC 204508 / S288c) GN=SCS7 PE=1 SV=1	2	1	1	NA	6	2	3	5.814	3.96489	19.9393	20.3833	6.13014e-12	9.31609e-11	17.6681	0.889617	0.74182	0.74182	Total_CL - Total_NoCL	limma	6.13014e-12	9.31609e-11	TRUE	enriched hit	5.814	FALSE	TRUE	TRUE
72	TDH1	P00360	Glyceraldehyde-3-phosphate dehydrogenase 1 OS=Saccharomyces cerevisiae (strain ATCC 204508 / S288c) GN=TDH1 PE=1 SV=3	2	1	1	NA	6	2	3	6.03181	3.65196	20.1673	20.3202	6.39821e-12	9.37446e-11	17.6286	0.889957	0.74182	0.74182	Total_CL - Total_NoCL	limma	6.39821e-12	9.37446e-11	TRUE	enriched hit	6.03181	TRUE	TRUE	FALSE
73	NEW1	Q08972	[NU+] prion formation protein 1 OS=Saccharomyces cerevisiae (strain ATCC 204508 / S288c) GN=NEW1 PE=1 SV=1	3	1	1	1	6	3	28	7.02297	4.00414	24.2752	20.3051	6.46408e-12	9.37446e-11	17.7171	0.890038	0.74182	0.74182	Total_CL - Total_NoCL	limma	6.46408e-12	9.37446e-11	TRUE	enriched hit	7.02297	FALSE	TRUE	TRUE
74	TRR1	P29509	Thioredoxin reductase 1 OS=Saccharomyces cerevisiae (strain ATCC 204508 / S288c) GN=TRR1 PE=1 SV=3	2	1	NA	1	6	2	4	6.00207	4.46215	20.3853	20.2897	6.53228e-12	9.37446e-11	17.5964	0.890121	0.74182	0.74182	Total_CL - Total_NoCL	limma	6.53228e-12	9.37446e-11	TRUE	enriched hit	6.00207	TRUE	TRUE	FALSE
75	GLC7	P32598	Serine/threonine-protein phosphatase PP1-2 OS=Saccharomyces cerevisiae (strain ATCC 204508 / S288c) GN=GLC7 PE=1 SV=1	2	1	1	NA	6	2	3	5.80122	4.61574	19.5039	20.2859	6.54902e-12	9.37446e-11	17.4115	0.890141	0.74182	0.74182	Total_CL - Total_NoCL	limma	6.54902e-12	9.37446e-11	TRUE	enriched hit	5.80122	TRUE	TRUE	FALSE
76	GLN4	P13188	Glutamine--tRNA ligase OS=Saccharomyces cerevisiae (strain ATCC 204508 / S288c) GN=GLN4 PE=1 SV=2	3	1	1	1	6	3	33	7.24822	5.09601	24.5944	20.2738	6.60296e-12	9.37446e-11	17.6968	0.890206	0.74182	0.74182	Total_CL - Total_NoCL	limma	6.60296e-12	9.37446e-11	TRUE	enriched hit	7.24822	TRUE	TRUE	FALSE
77	TEF1	P02994	Elongation factor 1-alpha OS=Saccharomyces cerevisiae (strain ATCC 204508 / S288c) GN=TEF1 PE=1 SV=1	3	1	1	1	6	3	21	8.55396	3.86377	25.8516	20.1804	7.03755e-12	9.7479e-11	17.636	0.890709	0.74182	0.74182	Total_CL - Total_NoCL	limma	7.03755e-12	9.7479e-11	TRUE	enriched hit	8.55396	TRUE	TRUE	FALSE
78	FRS1	P15624	Phenylalanine--tRNA ligase beta subunit OS=Saccharomyces cerevisiae (strain ATCC 204508 / S288c) GN=FRS1 PE=1 SV=3	3	1	1	1	6	3	10	6.42757	3.00601	22.8364	20.1785	7.04668e-12	9.7479e-11	17.6348	0.89072	0.74182	0.74182	Total_CL - Total_NoCL	limma	7.04668e-12	9.7479e-11	TRUE	enriched hit	6.42757	TRUE	TRUE	FALSE
79	NOG1	Q02892	Nucleolar GTP-binding protein 1 OS=Saccharomyces cerevisiae (strain ATCC 204508 / S288c) GN=NOG1 PE=1 SV=1	3	1	1	1	6	3	15	6.64396	4.63936	22.9096	20.148	7.19502e-12	9.82114e-11	17.6149	0.890883	0.74182	0.74182	Total_CL - Total_NoCL	limma	7.19502e-12	9.82114e-11	TRUE	enriched hit	6.64396	FALSE	TRUE	TRUE
80	RPS22A|RPS22B	P0C0W1|Q3E7Y3	40S ribosomal protein S22-A OS=Saccharomyces cerevisiae (strain ATCC 204508 / S288c) GN=RPS22A PE=1 SV=2|40S ribosomal protein S22-B OS=Saccharomyces cerevisiae (strain ATCC 204508 / S288c) GN=RPS22B PE=1 SV=3	2	1	1	NA	6	2	4	6.69193	4.53426	20.4838	20.13	7.28416e-12	9.82114e-11	17.5086	0.89098	0.74182	0.74182	Total_CL - Total_NoCL	limma	7.28416e-12	9.82114e-11	TRUE	enriched hit	6.69193	FALSE	TRUE	TRUE
81	GND1	P38720	6-phosphogluconate dehydrogenase, decarboxylating 1 OS=Saccharomyces cerevisiae (strain ATCC 204508 / S288c) GN=GND1 PE=1 SV=1	3	1	1	1	6	3	10	6.62653	3.56322	23.0239	20.1048	7.41102e-12	9.82114e-11	17.5866	0.891116	0.74182	0.74182	Total_CL - Total_NoCL	limma	7.41102e-12	9.82114e-11	TRUE	enriched hit	6.62653	TRUE	TRUE	FALSE
82	VAS1	P07806|P07806-2	Isoform Cytoplasmic of Valine--tRNA ligase, mitochondrial OS=Saccharomyces cerevisiae (strain ATCC 204508 / S288c) GN=VAS1|Valine--tRNA ligase, mitochondrial OS=Saccharomyces cerevisiae (strain ATCC 204508 / S288c) GN=VAS1 PE=1 SV=2	3	1	1	1	6	3	36	7.05608	3.93987	24.7582	20.0787	7.54481e-12	9.82114e-11	17.5695	0.891256	0.74182	0.74182	Total_CL - Total_NoCL	limma	7.54481e-12	9.82114e-11	TRUE	enriched hit	7.05608	TRUE	TRUE	FALSE
83	ARO4	P32449	Phospho-2-dehydro-3-deoxyheptonate aldolase, tyrosine-inhibited OS=Saccharomyces cerevisiae (strain ATCC 204508 / S288c) GN=ARO4 PE=1 SV=2	2	1	1	NA	6	2	4	6.32944	4.49164	20.827	20.0615	7.63466e-12	9.82114e-11	17.465	0.891349	0.74182	0.74182	Total_CL - Total_NoCL	limma	7.63466e-12	9.82114e-11	TRUE	enriched hit	6.32944	FALSE	TRUE	TRUE
84	RPL1A|RPL1B	P0CX43|P0CX44	60S ribosomal protein L1-A OS=Saccharomyces cerevisiae (strain ATCC 204508 / S288c) GN=RPL1A PE=1 SV=1|60S ribosomal protein L1-B OS=Saccharomyces cerevisiae (strain ATCC 204508 / S288c) GN=RPL1B PE=1 SV=1	3	1	1	1	6	3	6	6.66095	3.98435	21.6035	20.0554	7.66654e-12	9.82114e-11	17.5542	0.891382	0.74182	0.74182	Total_CL - Total_NoCL	limma	7.66654e-12	9.82114e-11	TRUE	enriched hit	6.66095	TRUE	TRUE	FALSE
85	RLP7	P40693	Ribosome biogenesis protein RLP7 OS=Saccharomyces cerevisiae (strain ATCC 204508 / S288c) GN=RLP7 PE=1 SV=1	3	1	1	1	6	3	11	7.24889	5.64085	23.2031	20.0422	7.73676e-12	9.82114e-11	17.5455	0.891453	0.74182	0.74182	Total_CL - Total_NoCL	limma	7.73676e-12	9.82114e-11	TRUE	enriched hit	7.24889	FALSE	TRUE	TRUE
86	PDC1	P06169	Pyruvate decarboxylase isozyme 1 OS=Saccharomyces cerevisiae (strain ATCC 204508 / S288c) GN=PDC1 PE=1 SV=7	3	1	1	1	6	3	16	8.03637	3.18353	24.4622	19.9407	8.2974e-12	1.03374e-10	17.4786	0.891999	0.74182	0.74182	Total_CL - Total_NoCL	limma	8.2974e-12	1.03374e-10	TRUE	enriched hit	8.03637	FALSE	TRUE	TRUE
87	TIF5	P38431|P38431-2	Eukaryotic translation initiation factor 5 OS=Saccharomyces cerevisiae (strain ATCC 204508 / S288c) GN=TIF5 PE=1 SV=1|Isoform Short of Eukaryotic translation initiation factor 5 OS=Saccharomyces cerevisiae (strain ATCC 204508 / S288c) GN=TIF5	3	1	1	1	6	3	8	6.33211	3.97123	21.8286	19.9314	8.35091e-12	1.03374e-10	17.4725	0.892049	0.74182	0.74182	Total_CL - Total_NoCL	limma	8.35091e-12	1.03374e-10	TRUE	enriched hit	6.33211	FALSE	TRUE	TRUE
88	PRM15	Q03262	Phosphoribomutase OS=Saccharomyces cerevisiae (strain ATCC 204508 / S288c) GN=PRM15 PE=1 SV=1	2	1	1	NA	5	2	2	5.60372	4.28548	19.6532	19.9176	8.4309e-12	1.03374e-10	17.3437	0.892123	0.74182	0.74182	Total_CL - Total_NoCL	limma	8.4309e-12	1.03374e-10	TRUE	enriched hit	5.60372	TRUE	TRUE	FALSE
89	MRPL10	P36520	54S ribosomal protein L10, mitochondrial OS=Saccharomyces cerevisiae (strain ATCC 204508 / S288c) GN=MRPL10 PE=1 SV=2	2	1	1	NA	6	2	6	6.04507	4.43374	21.0291	19.7548	9.44029e-12	1.1445e-10	17.256	0.893	0.74182	0.74182	Total_CL - Total_NoCL	limma	9.44029e-12	1.1445e-10	TRUE	enriched hit	6.04507	FALSE	TRUE	TRUE
90	GLO3	P38682	ADP-ribosylation factor GTPase-activating protein GLO3 OS=Saccharomyces cerevisiae (strain ATCC 204508 / S288c) GN=GLO3 PE=1 SV=1	2	1	1	NA	6	2	4	6.16571	3.76427	21.7224	19.6948	9.84417e-12	1.15543e-10	17.2288	0.893323	0.74182	0.74182	Total_CL - Total_NoCL	limma	9.84417e-12	1.15543e-10	TRUE	enriched hit	6.16571	TRUE	TRUE	FALSE
91	RPL37B	P51402	60S ribosomal protein L37-B OS=Saccharomyces cerevisiae (strain ATCC 204508 / S288c) GN=RPL37B PE=1 SV=2	2	1	1	NA	6	2	2	7.41017	5.93432	20.9032	19.6816	9.93548e-12	1.15543e-10	17.0429	0.893394	0.74182	0.74182	Total_CL - Total_NoCL	limma	9.93548e-12	1.15543e-10	TRUE	enriched hit	7.41017	TRUE	TRUE	FALSE
92	RPS25B|RPS25A	P0C0T4|Q3E792	40S ribosomal protein S25-B OS=Saccharomyces cerevisiae (strain ATCC 204508 / S288c) GN=RPS25B PE=1 SV=1|40S ribosomal protein S25-A OS=Saccharomyces cerevisiae (strain ATCC 204508 / S288c) GN=RPS25A PE=1 SV=1	3	1	1	1	6	3	7	7.60295	4.70853	23.788	19.6796	9.94949e-12	1.15543e-10	17.3047	0.893405	0.74182	0.74182	Total_CL - Total_NoCL	limma	9.94949e-12	1.15543e-10	TRUE	enriched hit	7.60295	TRUE	TRUE	FALSE
93	TIF4632	P39936	Eukaryotic initiation factor 4F subunit p130 OS=Saccharomyces cerevisiae (strain ATCC 204508 / S288c) GN=TIF4632 PE=1 SV=1	3	1	1	1	6	3	9	6.52538	4.55862	22.3104	19.6782	9.95879e-12	1.15543e-10	17.3038	0.893412	0.74182	0.74182	Total_CL - Total_NoCL	limma	9.95879e-12	1.15543e-10	TRUE	enriched hit	6.52538	FALSE	TRUE	TRUE
94	VMA1	P17255	V-type proton ATPase catalytic subunit A OS=Saccharomyces cerevisiae (strain ATCC 204508 / S288c) GN=VMA1 PE=1 SV=3	3	1	1	1	6	3	25	7.2569	3.26318	24.4298	19.6122	1.04306e-11	1.1973e-10	17.2594	0.893768	0.74182	0.74182	Total_CL - Total_NoCL	limma	1.04306e-11	1.1973e-10	TRUE	enriched hit	7.2569	TRUE	TRUE	FALSE
95	NPL3	Q01560	Nucleolar protein 3 OS=Saccharomyces cerevisiae (strain ATCC 204508 / S288c) GN=NPL3 PE=1 SV=1	3	1	1	1	6	3	12	7.44797	4.48016	23.0205	19.5746	1.07097e-11	1.19961e-10	17.234	0.89397	0.74182	0.74182	Total_CL - Total_NoCL	limma	1.07097e-11	1.19961e-10	TRUE	enriched hit	7.44797	FALSE	TRUE	TRUE
96	MAP1	Q01662	Methionine aminopeptidase 1 OS=Saccharomyces cerevisiae (strain ATCC 204508 / S288c) GN=MAP1 PE=1 SV=2	3	1	1	1	6	3	4	6.19633	4.6091	20.6716	19.566	1.07743e-11	1.19961e-10	17.2282	0.894016	0.74182	0.74182	Total_CL - Total_NoCL	limma	1.07743e-11	1.19961e-10	TRUE	enriched hit	6.19633	FALSE	TRUE	TRUE
97	SQT1	P35184	Ribosome assembly protein SQT1 OS=Saccharomyces cerevisiae (strain ATCC 204508 / S288c) GN=SQT1 PE=1 SV=2	3	1	1	1	6	3	3	6.45375	3.8207	20.7153	19.5647	1.07843e-11	1.19961e-10	17.2246	0.894023	0.74182	0.74182	Total_CL - Total_NoCL	limma	1.07843e-11	1.19961e-10	TRUE	enriched hit	6.45375	FALSE	TRUE	TRUE
98	PDR16	P53860	Phosphatidylinositol transfer protein PDR16 OS=Saccharomyces cerevisiae (strain ATCC 204508 / S288c) GN=PDR16 PE=1 SV=1	3	1	1	1	6	3	6	5.97615	3.76584	21.1186	19.3751	1.23303e-11	1.35759e-10	17.0986	0.895044	0.74182	0.74182	Total_CL - Total_NoCL	limma	1.23303e-11	1.35759e-10	TRUE	enriched hit	5.97615	FALSE	TRUE	TRUE
99	NOP7	P53261	Pescadillo homolog OS=Saccharomyces cerevisiae (strain ATCC 204508 / S288c) GN=NOP7 PE=1 SV=1	3	1	1	1	6	3	17	6.8767	5.05068	23.1266	19.3406	1.26364e-11	1.36835e-10	17.075	0.89523	0.74182	0.74182	Total_CL - Total_NoCL	limma	1.26364e-11	1.36835e-10	TRUE	enriched hit	6.8767	FALSE	TRUE	TRUE
100	YPT31	P38555	GTP-binding protein YPT31/YPT8 OS=Saccharomyces cerevisiae (strain ATCC 204508 / S288c) GN=YPT31 PE=1 SV=3	2	1	NA	1	6	2	4	6.21338	4.67045	21.6133	19.3356	1.26816e-11	1.36835e-10	16.9923	0.895257	0.74182	0.74182	Total_CL - Total_NoCL	limma	1.26816e-11	1.36835e-10	TRUE	enriched hit	6.21338	TRUE	TRUE	FALSE
101	TRM44	Q02648	tRNA (uracil-O(2)-)-methyltransferase OS=Saccharomyces cerevisiae (strain ATCC 204508 / S288c) GN=TRM44 PE=1 SV=1	2	1	1	NA	6	2	5	5.81827	4.40125	19.8455	19.2372	1.36032e-11	1.44899e-10	16.9266	0.895787	0.74182	0.74182	Total_CL - Total_NoCL	limma	1.36032e-11	1.44899e-10	TRUE	enriched hit	5.81827	TRUE	TRUE	FALSE
102	GUS1	P46655	Glutamate--tRNA ligase, cytoplasmic OS=Saccharomyces cerevisiae (strain ATCC 204508 / S288c) GN=GUS1 PE=1 SV=3	3	1	1	1	6	3	24	7.28949	4.03937	24.5081	19.2275	1.36976e-11	1.44899e-10	16.9973	0.895839	0.74182	0.74182	Total_CL - Total_NoCL	limma	1.36976e-11	1.44899e-10	TRUE	enriched hit	7.28949	TRUE	TRUE	FALSE
103	RPL38	P49167	60S ribosomal protein L38 OS=Saccharomyces cerevisiae (strain ATCC 204508 / S288c) GN=RPL38 PE=1 SV=1	3	1	1	1	6	3	3	7.10627	5.47957	21.7265	19.1772	1.42002e-11	1.48757e-10	16.9626	0.896111	0.74182	0.74182	Total_CL - Total_NoCL	limma	1.42002e-11	1.48757e-10	TRUE	enriched hit	7.10627	TRUE	TRUE	FALSE
104	NOP53	Q12080	Ribosome biogenesis protein NOP53 OS=Saccharomyces cerevisiae (strain ATCC 204508 / S288c) GN=NOP53 PE=1 SV=1	3	1	1	1	6	3	10	6.65669	4.22599	22.6326	19.05	1.55595e-11	1.61134e-10	16.8744	0.896796	0.74182	0.74182	Total_CL - Total_NoCL	limma	1.55595e-11	1.61134e-10	TRUE	enriched hit	6.65669	FALSE	TRUE	TRUE
105	GUA1	P38625	GMP synthase [glutamine-hydrolyzing] OS=Saccharomyces cerevisiae (strain ATCC 204508 / S288c) GN=GUA1 PE=1 SV=4	3	1	1	1	6	3	12	6.73935	3.90599	23.3412	19.0393	1.56803e-11	1.61134e-10	16.867	0.896853	0.74182	0.74182	Total_CL - Total_NoCL	limma	1.56803e-11	1.61134e-10	TRUE	enriched hit	6.73935	TRUE	TRUE	FALSE
106	NOG2	P53742	Nucleolar GTP-binding protein 2 OS=Saccharomyces cerevisiae (strain ATCC 204508 / S288c) GN=NOG2 PE=1 SV=1	3	1	1	1	6	3	16	6.61173	4.68726	22.7519	18.968	1.65097e-11	1.68056e-10	16.8172	0.897238	0.74182	0.74182	Total_CL - Total_NoCL	limma	1.65097e-11	1.68056e-10	TRUE	enriched hit	6.61173	FALSE	TRUE	TRUE
107	TAL1	P15019	Transaldolase OS=Saccharomyces cerevisiae (strain ATCC 204508 / S288c) GN=TAL1 PE=1 SV=4	3	1	1	1	6	3	10	6.26683	3.30784	22.5335	18.9548	1.66676e-11	1.68078e-10	16.808	0.897308	0.74182	0.74182	Total_CL - Total_NoCL	limma	1.66676e-11	1.68078e-10	TRUE	enriched hit	6.26683	TRUE	TRUE	FALSE
108	ERP1	Q05359	Protein ERP1 OS=Saccharomyces cerevisiae (strain ATCC 204508 / S288c) GN=ERP1 PE=1 SV=1	2	1	NA	1	6	2	2	5.88632	3.33652	20.3776	18.9173	1.71277e-11	1.71118e-10	16.7104	0.897511	0.74182	0.74182	Total_CL - Total_NoCL	limma	1.71277e-11	1.71118e-10	TRUE	enriched hit	5.88632	FALSE	TRUE	TRUE
109	RPL9A	P05738	60S ribosomal protein L9-A OS=Saccharomyces cerevisiae (strain ATCC 204508 / S288c) GN=RPL9A PE=1 SV=2	3	1	1	1	6	3	9	7.54812	4.67194	23.5396	18.8554	1.79151e-11	1.77343e-10	16.7383	0.897844	0.74182	0.74182	Total_CL - Total_NoCL	limma	1.79151e-11	1.77343e-10	TRUE	enriched hit	7.54812	TRUE	TRUE	FALSE
110	FBA1	P14540	Fructose-bisphosphate aldolase OS=Saccharomyces cerevisiae (strain ATCC 204508 / S288c) GN=FBA1 PE=1 SV=3	3	1	1	1	6	3	10	7.77361	3.87946	24.0181	18.8021	1.86252e-11	1.82696e-10	16.7007	0.898131	0.74182	0.74182	Total_CL - Total_NoCL	limma	1.86252e-11	1.82696e-10	TRUE	enriched hit	7.77361	TRUE	TRUE	FALSE
111	RPL35A|RPL35B	P0CX84|P0CX85	60S ribosomal protein L35-A OS=Saccharomyces cerevisiae (strain ATCC 204508 / S288c) GN=RPL35A PE=1 SV=1|60S ribosomal protein L35-B OS=Saccharomyces cerevisiae (strain ATCC 204508 / S288c) GN=RPL35B PE=1 SV=1	3	1	1	1	6	3	8	7.65088	6.53428	22.2978	18.7691	1.90797e-11	1.85468e-10	16.6774	0.898309	0.74182	0.74182	Total_CL - Total_NoCL	limma	1.90797e-11	1.85468e-10	TRUE	enriched hit	7.65088	TRUE	TRUE	FALSE
112	PUF3	Q07807	mRNA-binding protein PUF3 OS=Saccharomyces cerevisiae (strain ATCC 204508 / S288c) GN=PUF3 PE=1 SV=1	3	1	1	1	6	3	10	6.24148	5.62797	21.6174	18.7157	1.98407e-11	1.91144e-10	16.6395	0.898597	0.74182	0.74182	Total_CL - Total_NoCL	limma	1.98407e-11	1.91144e-10	TRUE	enriched hit	6.24148	FALSE	TRUE	TRUE
113	SRO9	P25567	RNA-binding protein SRO9 OS=Saccharomyces cerevisiae (strain ATCC 204508 / S288c) GN=SRO9 PE=1 SV=2	3	1	1	1	6	3	14	6.98457	5.63018	22.4169	18.692	2.01879e-11	1.92768e-10	16.6227	0.898724	0.74182	0.74182	Total_CL - Total_NoCL	limma	2.01879e-11	1.92768e-10	TRUE	enriched hit	6.98457	TRUE	TRUE	FALSE
114	RCK2	P38623	Serine/threonine-protein kinase RCK2 OS=Saccharomyces cerevisiae (strain ATCC 204508 / S288c) GN=RCK2 PE=1 SV=3	3	1	1	1	6	3	6	6.05339	3.64497	21.6731	18.6499	2.08221e-11	1.96449e-10	16.5928	0.898951	0.74182	0.74182	Total_CL - Total_NoCL	limma	2.08221e-11	1.96449e-10	TRUE	enriched hit	6.05339	FALSE	TRUE	TRUE
115	PUB1	P32588	Nuclear and cytoplasmic polyadenylated RNA-binding protein PUB1 OS=Saccharomyces cerevisiae (strain ATCC 204508 / S288c) GN=PUB1 PE=1 SV=4	3	1	1	1	6	3	8	7.64657	8.1814	22.1684	18.6424	2.09376e-11	1.96449e-10	16.5789	0.898992	0.74182	0.74182	Total_CL - Total_NoCL	limma	2.09376e-11	1.96449e-10	TRUE	enriched hit	7.64657	TRUE	TRUE	FALSE
116	ENO2	P00925	Enolase 2 OS=Saccharomyces cerevisiae (strain ATCC 204508 / S288c) GN=ENO2 PE=1 SV=2	3	1	1	1	6	3	13	7.26511	3.94361	23.7545	18.5842	2.18553e-11	2.03292e-10	16.5458	0.899306	0.74182	0.74182	Total_CL - Total_NoCL	limma	2.18553e-11	2.03292e-10	TRUE	enriched hit	7.26511	TRUE	TRUE	FALSE
117	HCR1	Q05775	Eukaryotic translation initiation factor 3 subunit J OS=Saccharomyces cerevisiae (strain ATCC 204508 / S288c) GN=HCR1 PE=1 SV=1	3	1	1	1	6	3	4	6.57433	4.57934	22.0441	18.5562	2.23113e-11	2.05538e-10	16.5258	0.899456	0.74182	0.74182	Total_CL - Total_NoCL	limma	2.23113e-11	2.05538e-10	TRUE	enriched hit	6.57433	FALSE	TRUE	TRUE
118	RPS11A|RPS11B	P0CX47|P0CX48	40S ribosomal protein S11-A OS=Saccharomyces cerevisiae (strain ATCC 204508 / S288c) GN=RPS11A PE=1 SV=1|40S ribosomal protein S11-B OS=Saccharomyces cerevisiae (strain ATCC 204508 / S288c) GN=RPS11B PE=1 SV=1	3	1	1	1	6	3	9	8.43563	6.0714	23.3871	18.5462	2.24778e-11	2.05538e-10	16.5186	0.89951	0.74182	0.74182	Total_CL - Total_NoCL	limma	2.24778e-11	2.05538e-10	TRUE	enriched hit	8.43563	FALSE	TRUE	TRUE
119	CDC19	P00549	Pyruvate kinase 1 OS=Saccharomyces cerevisiae (strain ATCC 204508 / S288c) GN=CDC19 PE=1 SV=2	3	1	1	1	6	3	33	8.43609	3.23774	25.9022	18.5129	2.30381e-11	2.08891e-10	16.4947	0.89969	0.74182	0.74182	Total_CL - Total_NoCL	limma	2.30381e-11	2.08891e-10	TRUE	enriched hit	8.43609	FALSE	TRUE	TRUE
120	URA2	P07259	Protein URA2 OS=Saccharomyces cerevisiae (strain ATCC 204508 / S288c) GN=URA2 PE=1 SV=5	3	1	1	1	6	3	44	7.17087	2.86078	25.0815	18.4955	2.33377e-11	2.09845e-10	16.4822	0.899784	0.74182	0.74182	Total_CL - Total_NoCL	limma	2.33377e-11	2.09845e-10	TRUE	enriched hit	7.17087	FALSE	TRUE	TRUE
121	DHH1	P39517	ATP-dependent RNA helicase DHH1 OS=Saccharomyces cerevisiae (strain ATCC 204508 / S288c) GN=DHH1 PE=1 SV=1	3	1	1	1	6	3	10	6.70652	4.24429	22.631	18.4497	2.41429e-11	2.14608e-10	16.4493	0.90003	0.74182	0.74182	Total_CL - Total_NoCL	limma	2.41429e-11	2.14608e-10	TRUE	enriched hit	6.70652	FALSE	TRUE	TRUE
122	THS1	P04801	Threonine--tRNA ligase, cytoplasmic OS=Saccharomyces cerevisiae (strain ATCC 204508 / S288c) GN=THS1 PE=1 SV=2	3	1	1	1	6	3	22	7.33409	4.69449	23.9433	18.4429	2.42652e-11	2.14608e-10	16.4444	0.900067	0.74182	0.74182	Total_CL - Total_NoCL	limma	2.42652e-11	2.14608e-10	TRUE	enriched hit	7.33409	TRUE	TRUE	FALSE
123	NUG1	P40010	Nuclear GTP-binding protein NUG1 OS=Saccharomyces cerevisiae (strain ATCC 204508 / S288c) GN=NUG1 PE=1 SV=1	3	1	1	1	6	3	7	6.27343	3.83458	22.1845	18.4198	2.46873e-11	2.16565e-10	16.4277	0.900192	0.74182	0.74182	Total_CL - Total_NoCL	limma	2.46873e-11	2.16565e-10	TRUE	enriched hit	6.27343	FALSE	TRUE	TRUE
124	LEU1	P07264	3-isopropylmalate dehydratase OS=Saccharomyces cerevisiae (strain ATCC 204508 / S288c) GN=LEU1 PE=1 SV=3	3	1	1	1	6	3	18	6.97359	3.38028	24.3815	18.4008	2.50386e-11	2.17876e-10	16.4139	0.900294	0.74182	0.74182	Total_CL - Total_NoCL	limma	2.50386e-11	2.17876e-10	TRUE	enriched hit	6.97359	FALSE	TRUE	TRUE
125	PAB1	P04147	Polyadenylate-binding protein, cytoplasmic and nuclear OS=Saccharomyces cerevisiae (strain ATCC 204508 / S288c) GN=PAB1 PE=1 SV=4	3	1	1	1	6	3	26	7.87772	6.42082	24.3105	18.3553	2.59018e-11	2.2127e-10	16.381	0.900539	0.74182	0.74182	Total_CL - Total_NoCL	limma	2.59018e-11	2.2127e-10	TRUE	enriched hit	7.87772	TRUE	TRUE	FALSE
126	YEF3	P16521	Elongation factor 3A OS=Saccharomyces cerevisiae (strain ATCC 204508 / S288c) GN=YEF3 PE=1 SV=4	3	1	1	1	6	3	35	8.00011	3.46719	25.5156	18.3528	2.59504e-11	2.2127e-10	16.3792	0.900553	0.74182	0.74182	Total_CL - Total_NoCL	limma	2.59504e-11	2.2127e-10	TRUE	enriched hit	8.00011	FALSE	TRUE	TRUE
127	ERG13	P54839	Hydroxymethylglutaryl-CoA synthase OS=Saccharomyces cerevisiae (strain ATCC 204508 / S288c) GN=ERG13 PE=1 SV=1	3	1	1	1	6	3	10	6.73674	3.06831	23.5363	18.3464	2.60745e-11	2.2127e-10	16.3746	0.900587	0.74182	0.74182	Total_CL - Total_NoCL	limma	2.60745e-11	2.2127e-10	TRUE	enriched hit	6.73674	FALSE	TRUE	TRUE
128	SBP1	P10080	Single-stranded nucleic acid-binding protein OS=Saccharomyces cerevisiae (strain ATCC 204508 / S288c) GN=SBP1 PE=1 SV=2	3	1	1	1	6	3	12	7.58513	5.48595	23.0128	18.3375	2.62489e-11	2.2127e-10	16.3681	0.900635	0.74182	0.74182	Total_CL - Total_NoCL	limma	2.62489e-11	2.2127e-10	TRUE	enriched hit	7.58513	FALSE	TRUE	TRUE
129	SEC14	P24280	SEC14 cytosolic factor OS=Saccharomyces cerevisiae (strain ATCC 204508 / S288c) GN=SEC14 PE=1 SV=3	3	1	1	1	6	3	5	6.38394	3.04858	22.803	18.32	2.65942e-11	2.22443e-10	16.3554	0.90073	0.74182	0.74182	Total_CL - Total_NoCL	limma	2.65942e-11	2.22443e-10	TRUE	enriched hit	6.38394	FALSE	TRUE	TRUE
130	HMT1	P38074	Protein arginine N-methyltransferase 1 OS=Saccharomyces cerevisiae (strain ATCC 204508 / S288c) GN=HMT1 PE=1 SV=1	2	1	1	NA	6	2	5	5.91033	3.8034	21.2412	18.269	2.76285e-11	2.29317e-10	16.259	0.901004	0.74182	0.74182	Total_CL - Total_NoCL	limma	2.76285e-11	2.29317e-10	TRUE	enriched hit	5.91033	FALSE	TRUE	TRUE
131	CLU1	Q03690	Clustered mitochondria protein 1 OS=Saccharomyces cerevisiae (strain ATCC 204508 / S288c) GN=CLU1 PE=1 SV=1	3	1	1	1	6	3	30	6.98209	3.84636	24.7202	18.2283	2.84852e-11	2.34623e-10	16.2886	0.901224	0.74182	0.74182	Total_CL - Total_NoCL	limma	2.84852e-11	2.34623e-10	TRUE	enriched hit	6.98209	FALSE	TRUE	TRUE
132	HOM6	P31116	Homoserine dehydrogenase OS=Saccharomyces cerevisiae (strain ATCC 204508 / S288c) GN=HOM6 PE=1 SV=1	3	1	1	1	6	3	8	6.96333	3.98364	22.6347	18.1948	2.92117e-11	2.38784e-10	16.2641	0.901404	0.74182	0.74182	Total_CL - Total_NoCL	limma	2.92117e-11	2.38784e-10	TRUE	enriched hit	6.96333	TRUE	TRUE	FALSE
133	TPI1	P00942	Triosephosphate isomerase OS=Saccharomyces cerevisiae (strain ATCC 204508 / S288c) GN=TPI1 PE=1 SV=2	3	1	1	1	6	3	6	7.26109	3.2917	23.4066	18.1762	2.96249e-11	2.4034e-10	16.2505	0.901505	0.74182	0.74182	Total_CL - Total_NoCL	limma	2.96249e-11	2.4034e-10	TRUE	enriched hit	7.26109	TRUE	TRUE	FALSE
134	EBP2	P36049	rRNA-processing protein EBP2 OS=Saccharomyces cerevisiae (strain ATCC 204508 / S288c) GN=EBP2 PE=1 SV=1	3	1	1	1	6	3	8	6.55132	2.99103	23.2159	18.1637	2.99055e-11	2.40807e-10	16.2413	0.901572	0.74182	0.74182	Total_CL - Total_NoCL	limma	2.99055e-11	2.40807e-10	TRUE	enriched hit	6.55132	FALSE	TRUE	TRUE
135	UTP7	P40055	U3 small nucleolar RNA-associated protein 7 OS=Saccharomyces cerevisiae (strain ATCC 204508 / S288c) GN=UTP7 PE=1 SV=1	3	1	1	1	6	3	5	6.03583	3.26412	21.7087	18.0991	3.13989e-11	2.49606e-10	16.1939	0.90192	0.74182	0.74182	Total_CL - Total_NoCL	limma	3.13989e-11	2.49606e-10	TRUE	enriched hit	6.03583	FALSE	TRUE	TRUE
136	ACO1	P19414	Aconitate hydratase, mitochondrial OS=Saccharomyces cerevisiae (strain ATCC 204508 / S288c) GN=ACO1 PE=1 SV=2	3	1	1	1	6	3	16	6.48618	3.27802	23.8279	18.0965	3.1461e-11	2.49606e-10	16.1919	0.901935	0.74182	0.74182	Total_CL - Total_NoCL	limma	3.1461e-11	2.49606e-10	TRUE	enriched hit	6.48618	TRUE	TRUE	FALSE
137	MRPL3	P36516	54S ribosomal protein L3, mitochondrial OS=Saccharomyces cerevisiae (strain ATCC 204508 / S288c) GN=MRPL3 PE=1 SV=2	2	1	NA	1	6	2	3	5.59567	4.75345	19.9867	18.0693	3.21141e-11	2.51847e-10	15.8242	0.902081	0.74182	0.74182	Total_CL - Total_NoCL	limma	3.21141e-11	2.51847e-10	TRUE	enriched hit	5.59567	FALSE	TRUE	TRUE
138	NSA2	P40078	Ribosome biogenesis protein NSA2 OS=Saccharomyces cerevisiae (strain ATCC 204508 / S288c) GN=NSA2 PE=1 SV=1	3	1	1	1	6	3	6	6.31178	4.67464	21.5152	18.0654	3.22102e-11	2.51847e-10	16.169	0.902102	0.74182	0.74182	Total_CL - Total_NoCL	limma	3.22102e-11	2.51847e-10	TRUE	enriched hit	6.31178	FALSE	TRUE	TRUE
139	SSO2	P39926	Protein SSO2 OS=Saccharomyces cerevisiae (strain ATCC 204508 / S288c) GN=SSO2 PE=1 SV=2	2	1	1	NA	6	2	2	6.08824	3.91235	20.1888	18.0426	3.27727e-11	2.54401e-10	16.0896	0.902225	0.74182	0.74182	Total_CL - Total_NoCL	limma	3.27727e-11	2.54401e-10	TRUE	enriched hit	6.08824	FALSE	TRUE	TRUE
140	RSM23	Q01163	37S ribosomal protein S23, mitochondrial OS=Saccharomyces cerevisiae (strain ATCC 204508 / S288c) GN=RSM23 PE=1 SV=3	3	1	1	1	6	3	4	5.78323	5.06787	19.7518	18.0237	3.3246e-11	2.56231e-10	16.1243	0.902327	0.74182	0.74182	Total_CL - Total_NoCL	limma	3.3246e-11	2.56231e-10	TRUE	enriched hit	5.78323	FALSE	TRUE	TRUE
141	GRS1	P38088|P38088-2	Glycine--tRNA ligase 1, mitochondrial OS=Saccharomyces cerevisiae (strain ATCC 204508 / S288c) GN=GRS1 PE=1 SV=3|Isoform Cytoplasmic of Glycine--tRNA ligase 1, mitochondrial OS=Saccharomyces cerevisiae (strain ATCC 204508 / S288c) GN=GRS1	3	1	1	1	6	3	24	7.01043	4.04995	24.4363	17.9844	3.42514e-11	2.62108e-10	16.1092	0.902539	0.74182	0.74182	Total_CL - Total_NoCL	limma	3.42514e-11	2.62108e-10	TRUE	enriched hit	7.01043	TRUE	TRUE	FALSE
142	RRP12	Q12754	Ribosomal RNA-processing protein 12 OS=Saccharomyces cerevisiae (strain ATCC 204508 / S288c) GN=RRP12 PE=1 SV=1	3	1	1	1	6	3	11	6.2818	3.20482	22.706	17.9549	3.50297e-11	2.6504e-10	16.0873	0.902698	0.74182	0.74182	Total_CL - Total_NoCL	limma	3.50297e-11	2.6504e-10	TRUE	enriched hit	6.2818	FALSE	TRUE	TRUE
143	SRP72	P38688	Signal recognition particle subunit SRP72 OS=Saccharomyces cerevisiae (strain ATCC 204508 / S288c) GN=SRP72 PE=1 SV=2	3	1	1	1	6	3	12	6.61797	4.86173	22.4255	17.9451	3.52934e-11	2.6504e-10	16.08	0.902751	0.74182	0.74182	Total_CL - Total_NoCL	limma	3.52934e-11	2.6504e-10	TRUE	enriched hit	6.61797	FALSE	TRUE	TRUE
144	YER156C	P40093	UPF0160 protein YER156C OS=Saccharomyces cerevisiae (strain ATCC 204508 / S288c) GN=YER156C PE=1 SV=1	3	1	1	1	6	3	6	5.98133	3.78374	21.6518	17.9413	3.53946e-11	2.6504e-10	16.0772	0.902771	0.74182	0.74182	Total_CL - Total_NoCL	limma	3.53946e-11	2.6504e-10	TRUE	enriched hit	5.98133	FALSE	TRUE	TRUE
145	PGK1	P00560	Phosphoglycerate kinase OS=Saccharomyces cerevisiae (strain ATCC 204508 / S288c) GN=PGK1 PE=1 SV=2	3	1	1	1	6	3	22	7.90739	4.23135	25.216	17.9331	3.56171e-11	2.6504e-10	16.0711	0.902816	0.74182	0.74182	Total_CL - Total_NoCL	limma	3.56171e-11	2.6504e-10	TRUE	enriched hit	7.90739	TRUE	TRUE	FALSE
146	RPL24A	P04449	60S ribosomal protein L24-A OS=Saccharomyces cerevisiae (strain ATCC 204508 / S288c) GN=RPL24A PE=1 SV=1	3	1	1	1	6	3	3	6.79476	7.54444	21.6503	17.9108	3.62289e-11	2.67747e-10	16.0545	0.902936	0.74182	0.74182	Total_CL - Total_NoCL	limma	3.62289e-11	2.67747e-10	TRUE	enriched hit	6.79476	FALSE	TRUE	TRUE
147	CPR6	P53691	Peptidyl-prolyl cis-trans isomerase CPR6 OS=Saccharomyces cerevisiae (strain ATCC 204508 / S288c) GN=CPR6 PE=1 SV=1	3	1	1	1	6	3	3	5.91849	3.39018	21.3468	17.7769	4.01425e-11	2.94651e-10	15.9544	0.903658	0.74182	0.74182	Total_CL - Total_NoCL	limma	4.01425e-11	2.94651e-10	TRUE	enriched hit	5.91849	TRUE	TRUE	FALSE
148	YMR315W	Q04869	Uncharacterized protein YMR315W OS=Saccharomyces cerevisiae (strain ATCC 204508 / S288c) GN=YMR315W PE=1 SV=1	2	1	NA	1	6	2	2	6.21291	4.64685	20.1557	17.7599	4.06711e-11	2.96514e-10	15.8916	0.90375	0.74182	0.74182	Total_CL - Total_NoCL	limma	4.06711e-11	2.96514e-10	TRUE	enriched hit	6.21291	TRUE	TRUE	FALSE
149	RRP8	P38961	25S rRNA (adenine(645)-N(1))-methyltransferase OS=Saccharomyces cerevisiae (strain ATCC 204508 / S288c) GN=RRP8 PE=1 SV=2	2	1	NA	1	6	2	4	5.80433	3.39529	21.3023	17.7359	4.14285e-11	3.00009e-10	15.874	0.903879	0.74182	0.74182	Total_CL - Total_NoCL	limma	4.14285e-11	3.00009e-10	TRUE	enriched hit	5.80433	FALSE	TRUE	TRUE
150	TUB2	P02557	Tubulin beta chain OS=Saccharomyces cerevisiae (strain ATCC 204508 / S288c) GN=TUB2 PE=1 SV=2	3	1	1	1	6	3	5	6.0705	4.11304	20.3698	17.6938	4.27949e-11	3.04112e-10	15.8684	0.904106	0.74182	0.74182	Total_CL - Total_NoCL	limma	4.27949e-11	3.04112e-10	TRUE	enriched hit	6.0705	TRUE	TRUE	FALSE
151	RPL10	P41805	60S ribosomal protein L10 OS=Saccharomyces cerevisiae (strain ATCC 204508 / S288c) GN=RPL10 PE=1 SV=1	3	1	1	1	6	3	14	7.78308	4.9428	24.2834	17.6907	4.28991e-11	3.04112e-10	15.8895	0.904123	0.74182	0.74182	Total_CL - Total_NoCL	limma	4.28991e-11	3.04112e-10	TRUE	enriched hit	7.78308	TRUE	TRUE	FALSE
152	YDR341C	Q05506	Arginine--tRNA ligase, cytoplasmic OS=Saccharomyces cerevisiae (strain ATCC 204508 / S288c) GN=YDR341C PE=1 SV=1	3	1	1	1	6	3	20	7.01703	4.25108	23.9503	17.685	4.30868e-11	3.04112e-10	15.8852	0.904153	0.74182	0.74182	Total_CL - Total_NoCL	limma	4.30868e-11	3.04112e-10	TRUE	enriched hit	7.01703	TRUE	TRUE	FALSE
153	RPL8A	P17076	60S ribosomal protein L8-A OS=Saccharomyces cerevisiae (strain ATCC 204508 / S288c) GN=RPL8A PE=1 SV=4	2	1	NA	1	6	2	2	6.82062	4.27217	20.8635	17.6691	4.36196e-11	3.04112e-10	15.8248	0.904239	0.74182	0.74182	Total_CL - Total_NoCL	limma	4.36196e-11	3.04112e-10	TRUE	enriched hit	6.82062	FALSE	TRUE	TRUE
154	ERG10	P41338	Acetyl-CoA acetyltransferase OS=Saccharomyces cerevisiae (strain ATCC 204508 / S288c) GN=ERG10 PE=1 SV=3	3	1	1	1	6	3	4	6.08592	4.28525	21.1813	17.6687	4.36327e-11	3.04112e-10	15.8673	0.904241	0.74182	0.74182	Total_CL - Total_NoCL	limma	4.36327e-11	3.04112e-10	TRUE	enriched hit	6.08592	TRUE	TRUE	FALSE
155	AAP1	P37898	Alanine/arginine aminopeptidase OS=Saccharomyces cerevisiae (strain ATCC 204508 / S288c) GN=AAP1 PE=1 SV=2	3	1	1	1	6	3	15	6.73601	2.96883	23.3821	17.6672	4.36861e-11	3.04112e-10	15.8717	0.90425	0.74182	0.74182	Total_CL - Total_NoCL	limma	4.36861e-11	3.04112e-10	TRUE	enriched hit	6.73601	FALSE	TRUE	TRUE
156	ARC1	P46672	tRNA-aminoacylation cofactor ARC1 OS=Saccharomyces cerevisiae (strain ATCC 204508 / S288c) GN=ARC1 PE=1 SV=2	3	1	1	1	6	3	8	6.54439	3.75246	22.3751	17.6444	4.44625e-11	3.07532e-10	15.8545	0.904373	0.74182	0.74182	Total_CL - Total_NoCL	limma	4.44625e-11	3.07532e-10	TRUE	enriched hit	6.54439	TRUE	TRUE	FALSE
157	CCT8	P47079	T-complex protein 1 subunit theta OS=Saccharomyces cerevisiae (strain ATCC 204508 / S288c) GN=CCT8 PE=1 SV=1	3	1	1	1	6	3	5	5.9636	2.78495	21.0937	17.633	4.48548e-11	3.0827e-10	15.8209	0.904434	0.74182	0.74182	Total_CL - Total_NoCL	limma	4.48548e-11	3.0827e-10	TRUE	enriched hit	5.9636	FALSE	TRUE	TRUE
158	MGM101	P32787	Mitochondrial genome maintenance protein MGM101 OS=Saccharomyces cerevisiae (strain ATCC 204508 / S288c) GN=MGM101 PE=1 SV=1	3	1	1	1	6	3	3	5.94908	4.74137	20.51	17.623	4.52037e-11	3.08702e-10	15.8383	0.904488	0.74182	0.74182	Total_CL - Total_NoCL	limma	4.52037e-11	3.08702e-10	TRUE	enriched hit	5.94908	TRUE	TRUE	FALSE
159	PBP1	P53297	PAB1-binding protein 1 OS=Saccharomyces cerevisiae (strain ATCC 204508 / S288c) GN=PBP1 PE=1 SV=1	3	1	1	1	6	3	6	6.24956	4.04842	21.7214	17.5975	4.61085e-11	3.129e-10	15.819	0.904626	0.74182	0.74182	Total_CL - Total_NoCL	limma	4.61085e-11	3.129e-10	TRUE	enriched hit	6.24956	FALSE	TRUE	TRUE
160	LPD1	P09624	Dihydrolipoyl dehydrogenase, mitochondrial OS=Saccharomyces cerevisiae (strain ATCC 204508 / S288c) GN=LPD1 PE=1 SV=1	3	1	1	1	6	3	14	6.3928	3.12632	23.1217	17.5605	4.74511e-11	3.18386e-10	15.7909	0.904825	0.74182	0.74182	Total_CL - Total_NoCL	limma	4.74511e-11	3.18386e-10	TRUE	enriched hit	6.3928	TRUE	TRUE	FALSE
161	ERG6	P25087	Sterol 24-C-methyltransferase OS=Saccharomyces cerevisiae (strain ATCC 204508 / S288c) GN=ERG6 PE=1 SV=4	3	1	1	1	6	3	8	6.3742	3.33166	22.2448	17.559	4.75071e-11	3.18386e-10	15.7897	0.904833	0.74182	0.74182	Total_CL - Total_NoCL	limma	4.75071e-11	3.18386e-10	TRUE	enriched hit	6.3742	FALSE	TRUE	TRUE
162	YHR127W	P38833	Uncharacterized protein YHR127W OS=Saccharomyces cerevisiae (strain ATCC 204508 / S288c) GN=YHR127W PE=1 SV=1	2	1	NA	1	6	2	2	5.66951	3.56319	20.2402	17.5266	4.87198e-11	3.24498e-10	15.6118	0.905008	0.74182	0.74182	Total_CL - Total_NoCL	limma	4.87198e-11	3.24498e-10	TRUE	enriched hit	5.66951	FALSE	TRUE	TRUE
163	TIF35	Q04067	Eukaryotic translation initiation factor 3 subunit G OS=Saccharomyces cerevisiae (strain ATCC 204508 / S288c) GN=TIF35 PE=1 SV=1	3	1	1	1	6	3	5	6.73989	4.47267	21.9779	17.4642	5.11501e-11	3.38595e-10	15.7174	0.905345	0.74182	0.74182	Total_CL - Total_NoCL	limma	5.11501e-11	3.38595e-10	TRUE	enriched hit	6.73989	TRUE	TRUE	FALSE
164	CDC37	P06101	Hsp90 co-chaperone Cdc37 OS=Saccharomyces cerevisiae (strain ATCC 204508 / S288c) GN=CDC37 PE=1 SV=2	2	1	1	NA	6	2	4	5.67547	3.46145	20.9382	17.4126	5.32585e-11	3.50402e-10	15.6341	0.905623	0.74182	0.74182	Total_CL - Total_NoCL	limma	5.32585e-11	3.50402e-10	TRUE	enriched hit	5.67547	FALSE	TRUE	TRUE
165	LYS12	P40495	Homoisocitrate dehydrogenase, mitochondrial OS=Saccharomyces cerevisiae (strain ATCC 204508 / S288c) GN=LYS12 PE=1 SV=1	3	1	1	1	6	3	8	6.18929	5.31223	21.716	17.4008	5.37516e-11	3.51503e-10	15.6689	0.905686	0.74182	0.74182	Total_CL - Total_NoCL	limma	5.37516e-11	3.51503e-10	TRUE	enriched hit	6.18929	FALSE	TRUE	TRUE
166	MBF1	O14467	Multiprotein-bridging factor 1 OS=Saccharomyces cerevisiae (strain ATCC 204508 / S288c) GN=MBF1 PE=1 SV=2	3	1	1	1	6	3	8	7.18304	5.56031	22.3841	17.3863	5.43684e-11	3.51567e-10	15.6577	0.905765	0.74182	0.74182	Total_CL - Total_NoCL	limma	5.43684e-11	3.51567e-10	TRUE	enriched hit	7.18304	FALSE	TRUE	TRUE
167	GLN1	P32288	Glutamine synthetase OS=Saccharomyces cerevisiae (strain ATCC 204508 / S288c) GN=GLN1 PE=1 SV=4	3	1	1	1	6	3	5	6.32525	2.56961	23.0747	17.3852	5.4413e-11	3.51567e-10	15.6569	0.905771	0.74182	0.74182	Total_CL - Total_NoCL	limma	5.4413e-11	3.51567e-10	TRUE	enriched hit	6.32525	FALSE	TRUE	TRUE
168	CRP1	P38845	Cruciform DNA-recognizing protein 1 OS=Saccharomyces cerevisiae (strain ATCC 204508 / S288c) GN=CRP1 PE=1 SV=1	3	1	1	1	6	3	13	6.59378	5.23745	22.348	17.374	5.48969e-11	3.52582e-10	15.6482	0.905831	0.74182	0.74182	Total_CL - Total_NoCL	limma	5.48969e-11	3.52582e-10	TRUE	enriched hit	6.59378	TRUE	TRUE	FALSE
169	RPL43A|RPL43B	P0CX25|P0CX26	60S ribosomal protein L43-A OS=Saccharomyces cerevisiae (strain ATCC 204508 / S288c) GN=RPL43A PE=1 SV=1|60S ribosomal protein L43-B OS=Saccharomyces cerevisiae (strain ATCC 204508 / S288c) GN=RPL43B PE=1 SV=1	3	1	1	1	6	3	4	7.21416	3.7157	21.9785	17.358	5.55873e-11	3.54824e-10	15.636	0.905917	0.74182	0.74182	Total_CL - Total_NoCL	limma	5.55873e-11	3.54824e-10	TRUE	enriched hit	7.21416	FALSE	TRUE	TRUE
170	YHR020W	P38708	Putative proline--tRNA ligase YHR020W OS=Saccharomyces cerevisiae (strain ATCC 204508 / S288c) GN=YHR020W PE=1 SV=1	3	1	1	1	6	3	11	6.89557	3.89622	23.3254	17.3439	5.62098e-11	3.54824e-10	15.625	0.905994	0.74182	0.74182	Total_CL - Total_NoCL	limma	5.62098e-11	3.54824e-10	TRUE	enriched hit	6.89557	TRUE	TRUE	FALSE
171	RPL19A|RPL19B	P0CX82|P0CX83	60S ribosomal protein L19-A OS=Saccharomyces cerevisiae (strain ATCC 204508 / S288c) GN=RPL19A PE=1 SV=1|60S ribosomal protein L19-B OS=Saccharomyces cerevisiae (strain ATCC 204508 / S288c) GN=RPL19B PE=1 SV=1	3	1	1	1	6	3	8	7.32205	6.63303	22.325	17.3399	5.63862e-11	3.54824e-10	15.622	0.906015	0.74182	0.74182	Total_CL - Total_NoCL	limma	5.63862e-11	3.54824e-10	TRUE	enriched hit	7.32205	FALSE	TRUE	TRUE
172	MTR4	P47047	ATP-dependent RNA helicase DOB1 OS=Saccharomyces cerevisiae (strain ATCC 204508 / S288c) GN=MTR4 PE=1 SV=1	3	1	1	1	6	3	11	6.0797	3.11731	22.0451	17.3359	5.65614e-11	3.54824e-10	15.6178	0.906037	0.74182	0.74182	Total_CL - Total_NoCL	limma	5.65614e-11	3.54824e-10	TRUE	enriched hit	6.0797	FALSE	TRUE	TRUE
173	DBP9	Q06218	ATP-dependent RNA helicase DBP9 OS=Saccharomyces cerevisiae (strain ATCC 204508 / S288c) GN=DBP9 PE=1 SV=1	3	1	1	1	6	3	5	6.03496	3.92401	21.5893	17.3176	5.73819e-11	3.57503e-10	15.6048	0.906135	0.74182	0.74182	Total_CL - Total_NoCL	limma	5.73819e-11	3.57503e-10	TRUE	enriched hit	6.03496	TRUE	TRUE	FALSE
174	RPS27A|RPS27B	P35997|P38711	40S ribosomal protein S27-A OS=Saccharomyces cerevisiae (strain ATCC 204508 / S288c) GN=RPS27A PE=1 SV=1|40S ribosomal protein S27-B OS=Saccharomyces cerevisiae (strain ATCC 204508 / S288c) GN=RPS27B PE=1 SV=1	3	1	1	1	6	3	3	6.96439	4.48778	21.7736	17.3078	5.7827e-11	3.57503e-10	15.5972	0.906188	0.74182	0.74182	Total_CL - Total_NoCL	limma	5.7827e-11	3.57503e-10	TRUE	enriched hit	6.96439	TRUE	TRUE	FALSE
175	LSG1	P53145	Large subunit GTPase 1 OS=Saccharomyces cerevisiae (strain ATCC 204508 / S288c) GN=LSG1 PE=1 SV=1	3	1	1	1	6	3	15	6.59289	4.92685	22.5989	17.3044	5.79824e-11	3.57503e-10	15.5946	0.906207	0.74182	0.74182	Total_CL - Total_NoCL	limma	5.79824e-11	3.57503e-10	TRUE	enriched hit	6.59289	FALSE	TRUE	TRUE
176	THO1	P40040	Protein THO1 OS=Saccharomyces cerevisiae (strain ATCC 204508 / S288c) GN=THO1 PE=1 SV=1	3	1	1	1	6	3	3	6.07505	4.60623	20.8789	17.2392	6.10475e-11	3.74258e-10	15.5431	0.906559	0.74182	0.74182	Total_CL - Total_NoCL	limma	6.10475e-11	3.74258e-10	TRUE	enriched hit	6.07505	TRUE	TRUE	FALSE
177	BRX1	Q08235	Ribosome biogenesis protein BRX1 OS=Saccharomyces cerevisiae (strain ATCC 204508 / S288c) GN=BRX1 PE=1 SV=2	3	1	1	1	6	3	4	6.08361	5.66474	20.2538	17.232	6.13935e-11	3.74258e-10	15.2878	0.906597	0.74182	0.74182	Total_CL - Total_NoCL	limma	6.13935e-11	3.74258e-10	TRUE	enriched hit	6.08361	FALSE	TRUE	TRUE
178	SEC18	P18759	Vesicular-fusion protein SEC18 OS=Saccharomyces cerevisiae (strain ATCC 204508 / S288c) GN=SEC18 PE=1 SV=2	3	1	1	1	6	3	7	5.81699	3.1084	20.8822	17.1716	6.4403e-11	3.89889e-10	15.4906	0.906923	0.74182	0.74182	Total_CL - Total_NoCL	limma	6.4403e-11	3.89889e-10	TRUE	enriched hit	5.81699	FALSE	TRUE	TRUE
179	ADE12	P80210	Adenylosuccinate synthetase OS=Saccharomyces cerevisiae (strain ATCC 204508 / S288c) GN=ADE12 PE=1 SV=3	3	1	1	1	6	3	6	6.18622	3.75523	21.3375	17.1662	6.46804e-11	3.89889e-10	15.4874	0.906952	0.74182	0.74182	Total_CL - Total_NoCL	limma	6.46804e-11	3.89889e-10	TRUE	enriched hit	6.18622	TRUE	TRUE	FALSE
180	SOF1	P33750	Protein SOF1 OS=Saccharomyces cerevisiae (strain ATCC 204508 / S288c) GN=SOF1 PE=1 SV=1	3	1	1	1	6	3	6	6.27517	4.11758	21.9489	17.1556	6.52259e-11	3.90993e-10	15.4791	0.907009	0.74182	0.74182	Total_CL - Total_NoCL	limma	6.52259e-11	3.90993e-10	TRUE	enriched hit	6.27517	FALSE	TRUE	TRUE
181	GDI1	P39958	Rab GDP-dissociation inhibitor OS=Saccharomyces cerevisiae (strain ATCC 204508 / S288c) GN=GDI1 PE=1 SV=1	2	1	1	NA	6	2	3	5.83406	4.10563	20.6592	17.14	6.60384e-11	3.93676e-10	15.428	0.907094	0.74182	0.74182	Total_CL - Total_NoCL	limma	6.60384e-11	3.93676e-10	TRUE	enriched hit	5.83406	TRUE	TRUE	FALSE
182	DIM1	P41819	Dimethyladenosine transferase OS=Saccharomyces cerevisiae (strain ATCC 204508 / S288c) GN=DIM1 PE=3 SV=1	3	1	1	1	6	3	7	6.32136	4.10754	22.0449	17.1287	6.66359e-11	3.95056e-10	15.4581	0.907155	0.74182	0.74182	Total_CL - Total_NoCL	limma	6.66359e-11	3.95056e-10	TRUE	enriched hit	6.32136	FALSE	TRUE	TRUE
183	RPL4A	P10664	60S ribosomal protein L4-A OS=Saccharomyces cerevisiae (strain ATCC 204508 / S288c) GN=RPL4A PE=1 SV=4	3	1	1	1	6	3	2	6.90218	7.32556	21.1079	17.044	7.12892e-11	4.20333e-10	15.3909	0.907612	0.74182	0.74182	Total_CL - Total_NoCL	limma	7.12892e-11	4.20333e-10	TRUE	enriched hit	6.90218	FALSE	TRUE	TRUE
184	UGP1	P32861	UTP--glucose-1-phosphate uridylyltransferase OS=Saccharomyces cerevisiae (strain ATCC 204508 / S288c) GN=UGP1 PE=1 SV=1	3	1	1	1	6	3	11	6.58569	2.98017	23.4104	17.0225	7.25253e-11	4.25298e-10	15.3749	0.907728	0.74182	0.74182	Total_CL - Total_NoCL	limma	7.25253e-11	4.25298e-10	TRUE	enriched hit	6.58569	FALSE	TRUE	TRUE
185	NAM7	P30771	ATP-dependent helicase NAM7 OS=Saccharomyces cerevisiae (strain ATCC 204508 / S288c) GN=NAM7 PE=1 SV=1	3	1	1	1	6	3	8	6.08239	4.39027	21.5188	16.8921	8.05315e-11	4.69695e-10	15.272	0.908432	0.74182	0.74182	Total_CL - Total_NoCL	limma	8.05315e-11	4.69695e-10	TRUE	enriched hit	6.08239	FALSE	TRUE	TRUE
186	ENP1	P38333	Essential nuclear protein 1 OS=Saccharomyces cerevisiae (strain ATCC 204508 / S288c) GN=ENP1 PE=1 SV=1	3	1	1	1	6	3	7	6.46352	4.5091	22.1893	16.8312	8.45832e-11	4.90673e-10	15.2237	0.90876	0.74182	0.74182	Total_CL - Total_NoCL	limma	8.45832e-11	4.90673e-10	TRUE	enriched hit	6.46352	FALSE	TRUE	TRUE
187	NMD3	P38861	60S ribosomal export protein NMD3 OS=Saccharomyces cerevisiae (strain ATCC 204508 / S288c) GN=NMD3 PE=1 SV=3	3	1	1	1	6	3	7	6.57394	3.86492	21.5658	16.7801	8.81542e-11	5.08655e-10	15.1829	0.909036	0.74182	0.74182	Total_CL - Total_NoCL	limma	8.81542e-11	5.08655e-10	TRUE	enriched hit	6.57394	FALSE	TRUE	TRUE
188	STM1	P39015	Suppressor protein STM1 OS=Saccharomyces cerevisiae (strain ATCC 204508 / S288c) GN=STM1 PE=1 SV=3	3	1	1	1	6	3	15	7.78613	5.0099	23.6145	16.6859	9.51693e-11	5.44417e-10	15.1075	0.909544	0.74182	0.74182	Total_CL - Total_NoCL	limma	9.51693e-11	5.44417e-10	TRUE	enriched hit	7.78613	FALSE	TRUE	TRUE
189	CCT5	P40413	T-complex protein 1 subunit epsilon OS=Saccharomyces cerevisiae (strain ATCC 204508 / S288c) GN=CCT5 PE=1 SV=3	3	1	1	1	6	3	7	6.34844	3.37618	22.4358	16.6834	9.53613e-11	5.44417e-10	15.1055	0.909558	0.74182	0.74182	Total_CL - Total_NoCL	limma	9.53613e-11	5.44417e-10	TRUE	enriched hit	6.34844	FALSE	TRUE	TRUE
190	TKL1	P23254	Transketolase 1 OS=Saccharomyces cerevisiae (strain ATCC 204508 / S288c) GN=TKL1 PE=1 SV=4	3	1	1	1	6	3	14	6.9188	2.6534	24.2056	16.5177	1.09208e-10	6.20189e-10	14.9718	0.910452	0.74182	0.74182	Total_CL - Total_NoCL	limma	1.09208e-10	6.20189e-10	TRUE	enriched hit	6.9188	TRUE	TRUE	FALSE
191	YPL199C	Q08954	Smr domain-containing protein YPL199C OS=Saccharomyces cerevisiae (strain ATCC 204508 / S288c) GN=YPL199C PE=1 SV=1	3	1	1	1	6	3	3	5.67251	4.0067	19.4812	16.4689	1.13692e-10	6.42272e-10	14.8523	0.910716	0.74182	0.74182	Total_CL - Total_NoCL	limma	1.13692e-10	6.42272e-10	TRUE	enriched hit	5.67251	TRUE	TRUE	FALSE
192	CCS1	P40202	Superoxide dismutase 1 copper chaperone OS=Saccharomyces cerevisiae (strain ATCC 204508 / S288c) GN=CCS1 PE=1 SV=1	2	1	NA	1	6	2	2	5.87879	4.65623	20.8136	16.4562	1.14887e-10	6.45639e-10	14.8947	0.910784	0.74182	0.74182	Total_CL - Total_NoCL	limma	1.14887e-10	6.45639e-10	TRUE	enriched hit	5.87879	TRUE	TRUE	FALSE
193	GLT1	Q12680	Glutamate synthase [NADH] OS=Saccharomyces cerevisiae (strain ATCC 204508 / S288c) GN=GLT1 PE=1 SV=2	3	1	1	1	6	3	33	7.11335	2.69487	24.4345	16.4259	1.17794e-10	6.58548e-10	14.8971	0.910948	0.74182	0.74182	Total_CL - Total_NoCL	limma	1.17794e-10	6.58548e-10	TRUE	enriched hit	7.11335	FALSE	TRUE	TRUE
194	HYP2	P23301	Eukaryotic translation initiation factor 5A-1 OS=Saccharomyces cerevisiae (strain ATCC 204508 / S288c) GN=HYP2 PE=1 SV=3	2	1	1	NA	6	2	3	6.60365	4.75589	21.9022	16.4168	1.18681e-10	6.60088e-10	14.8633	0.910997	0.74182	0.74182	Total_CL - Total_NoCL	limma	1.18681e-10	6.60088e-10	TRUE	enriched hit	6.60365	TRUE	TRUE	FALSE
195	RPL5	P26321	60S ribosomal protein L5 OS=Saccharomyces cerevisiae (strain ATCC 204508 / S288c) GN=RPL5 PE=1 SV=4	3	1	1	1	6	3	17	8.67472	5.31439	24.5864	16.3727	1.23101e-10	6.81159e-10	14.8536	0.911235	0.74182	0.74182	Total_CL - Total_NoCL	limma	1.23101e-10	6.81159e-10	TRUE	enriched hit	8.67472	TRUE	TRUE	FALSE
196	GCD10	P41814	tRNA (adenine(58)-N(1))-methyltransferase non-catalytic subunit TRM6 OS=Saccharomyces cerevisiae (strain ATCC 204508 / S288c) GN=GCD10 PE=1 SV=1	3	1	1	1	6	3	4	5.94919	4.47171	20.5587	16.3421	1.26262e-10	6.91636e-10	14.8285	0.9114	0.74182	0.74182	Total_CL - Total_NoCL	limma	1.26262e-10	6.91636e-10	TRUE	enriched hit	5.94919	TRUE	TRUE	FALSE
197	RPL22A	P05749	60S ribosomal protein L22-A OS=Saccharomyces cerevisiae (strain ATCC 204508 / S288c) GN=RPL22A PE=1 SV=3	3	1	1	1	5	3	2	6.21327	5.38082	19.5689	16.342	1.26276e-10	6.91636e-10	14.7382	0.911401	0.74182	0.74182	Total_CL - Total_NoCL	limma	1.26276e-10	6.91636e-10	TRUE	enriched hit	6.21327	FALSE	TRUE	TRUE
198	RSP5	P39940	E3 ubiquitin-protein ligase RSP5 OS=Saccharomyces cerevisiae (strain ATCC 204508 / S288c) GN=RSP5 PE=1 SV=1	3	1	1	1	6	3	9	6.03773	2.90986	21.9623	16.3209	1.28505e-10	7.00287e-10	14.8111	0.911515	0.74182	0.74182	Total_CL - Total_NoCL	limma	1.28505e-10	7.00287e-10	TRUE	enriched hit	6.03773	FALSE	TRUE	TRUE
199	HEK2	P38199	Heterogeneous nuclear rnp K-like protein 2 OS=Saccharomyces cerevisiae (strain ATCC 204508 / S288c) GN=HEK2 PE=1 SV=1	3	1	1	1	6	3	11	7.2321	6.03678	22.6038	16.2996	1.30799e-10	7.09208e-10	14.7936	0.91163	0.74182	0.74182	Total_CL - Total_NoCL	limma	1.30799e-10	7.09208e-10	TRUE	enriched hit	7.2321	TRUE	TRUE	FALSE
200	UBP3	Q01477	Ubiquitin carboxyl-terminal hydrolase 3 OS=Saccharomyces cerevisiae (strain ATCC 204508 / S288c) GN=UBP3 PE=1 SV=1	3	1	1	1	6	3	9	6.1804	4.77938	21.5103	16.291	1.3174e-10	7.10738e-10	14.7865	0.911676	0.74182	0.74182	Total_CL - Total_NoCL	limma	1.3174e-10	7.10738e-10	TRUE	enriched hit	6.1804	FALSE	TRUE	TRUE
201	ARB1	P40024	ABC transporter ATP-binding protein ARB1 OS=Saccharomyces cerevisiae (strain ATCC 204508 / S288c) GN=ARB1 PE=1 SV=1	3	1	1	1	6	3	12	6.58108	4.4492	22.0874	16.269	1.34179e-10	7.20295e-10	14.7684	0.911795	0.74182	0.74182	Total_CL - Total_NoCL	limma	1.34179e-10	7.20295e-10	TRUE	enriched hit	6.58108	FALSE	TRUE	TRUE
202	LOS1	P33418	Exportin-T OS=Saccharomyces cerevisiae (strain ATCC 204508 / S288c) GN=LOS1 PE=1 SV=1	2	1	1	NA	6	2	2	5.62571	3.08268	19.4564	16.2526	1.36028e-10	7.26607e-10	14.7104	0.911884	0.74182	0.74182	Total_CL - Total_NoCL	limma	1.36028e-10	7.26607e-10	TRUE	enriched hit	5.62571	FALSE	TRUE	TRUE
203	RPS7A	P26786	40S ribosomal protein S7-A OS=Saccharomyces cerevisiae (strain ATCC 204508 / S288c) GN=RPS7A PE=1 SV=4	3	1	1	1	6	3	4	6.8732	7.44102	20.9239	16.2016	1.41947e-10	7.54487e-10	14.701	0.912159	0.74182	0.74182	Total_CL - Total_NoCL	limma	1.41947e-10	7.54487e-10	TRUE	enriched hit	6.8732	FALSE	TRUE	TRUE
204	HTS1	P07263|P07263-2	Histidine--tRNA ligase, mitochondrial OS=Saccharomyces cerevisiae (strain ATCC 204508 / S288c) GN=HTS1 PE=1 SV=2|Isoform Cytoplasmic of Histidine--tRNA ligase, mitochondrial OS=Saccharomyces cerevisiae (strain ATCC 204508 / S288c) GN=HTS1	3	1	1	1	6	3	12	6.69718	4.79986	22.8294	16.187	1.43684e-10	7.5652e-10	14.7007	0.912238	0.74182	0.74182	Total_CL - Total_NoCL	limma	1.43684e-10	7.5652e-10	TRUE	enriched hit	6.69718	TRUE	TRUE	FALSE
205	ECM32	P32644	Putative ATP-dependent RNA helicase ECM32 OS=Saccharomyces cerevisiae (strain ATCC 204508 / S288c) GN=ECM32 PE=1 SV=1	3	1	1	1	6	3	9	5.99963	4.15339	21.3913	16.1866	1.43732e-10	7.5652e-10	14.7001	0.91224	0.74182	0.74182	Total_CL - Total_NoCL	limma	1.43732e-10	7.5652e-10	TRUE	enriched hit	5.99963	TRUE	TRUE	FALSE
206	RPS16A|RPS16B	P0CX51|P0CX52	40S ribosomal protein S16-A OS=Saccharomyces cerevisiae (strain ATCC 204508 / S288c) GN=RPS16A PE=1 SV=1|40S ribosomal protein S16-B OS=Saccharomyces cerevisiae (strain ATCC 204508 / S288c) GN=RPS16B PE=1 SV=1	3	1	1	1	6	3	8	7.33206	4.66755	23.2408	16.148	1.48467e-10	7.77651e-10	14.6683	0.912449	0.74182	0.74182	Total_CL - Total_NoCL	limma	1.48467e-10	7.77651e-10	TRUE	enriched hit	7.33206	FALSE	TRUE	TRUE
207	YCP4	P25349	Flavoprotein-like protein YCP4 OS=Saccharomyces cerevisiae (strain ATCC 204508 / S288c) GN=YCP4 PE=1 SV=1	3	1	1	1	6	3	4	5.99157	4.48033	21.0534	16.131	1.50602e-10	7.85024e-10	14.6541	0.91254	0.74182	0.74182	Total_CL - Total_NoCL	limma	1.50602e-10	7.85024e-10	TRUE	enriched hit	5.99157	FALSE	TRUE	TRUE
208	TYS1	P36421	Tyrosine--tRNA ligase, cytoplasmic OS=Saccharomyces cerevisiae (strain ATCC 204508 / S288c) GN=TYS1 PE=1 SV=3	3	1	1	1	6	3	18	7.66425	5.64222	24.6658	16.0974	1.54916e-10	8.03626e-10	14.6262	0.912722	0.74182	0.74182	Total_CL - Total_NoCL	limma	1.54916e-10	8.03626e-10	TRUE	enriched hit	7.66425	TRUE	TRUE	FALSE
209	FAA4	P47912	Long-chain-fatty-acid--CoA ligase 4 OS=Saccharomyces cerevisiae (strain ATCC 204508 / S288c) GN=FAA4 PE=1 SV=1	3	1	1	1	6	3	8	6.59173	3.36224	21.9558	16.0792	1.57309e-10	8.12136e-10	14.611	0.91282	0.74182	0.74182	Total_CL - Total_NoCL	limma	1.57309e-10	8.12136e-10	TRUE	enriched hit	6.59173	FALSE	TRUE	TRUE
210	AAH1	P53909	Adenine deaminase OS=Saccharomyces cerevisiae (strain ATCC 204508 / S288c) GN=AAH1 PE=1 SV=1	3	1	1	1	6	3	5	5.75146	3.51142	21.1684	16.0561	1.60402e-10	8.2416e-10	14.5917	0.912945	0.74182	0.74182	Total_CL - Total_NoCL	limma	1.60402e-10	8.2416e-10	TRUE	enriched hit	5.75146	TRUE	TRUE	FALSE
211	MNN1	P39106	Alpha-1,3-mannosyltransferase MNN1 OS=Saccharomyces cerevisiae (strain ATCC 204508 / S288c) GN=MNN1 PE=1 SV=1	3	1	1	1	6	3	8	5.96774	2.71804	21.7418	16.0354	1.6323e-10	8.34717e-10	14.5744	0.913057	0.74182	0.74182	Total_CL - Total_NoCL	limma	1.6323e-10	8.34717e-10	TRUE	enriched hit	5.96774	FALSE	TRUE	TRUE
212	RRP45	Q05636	Exosome complex component RRP45 OS=Saccharomyces cerevisiae (strain ATCC 204508 / S288c) GN=RRP45 PE=1 SV=1	3	1	1	1	6	3	3	5.71528	3.03739	21.0352	16.0257	1.64568e-10	8.37588e-10	14.5663	0.913109	0.74182	0.74182	Total_CL - Total_NoCL	limma	1.64568e-10	8.37588e-10	TRUE	enriched hit	5.71528	TRUE	TRUE	FALSE
213	POM33	Q12164	Pore membrane protein of 33 kDa OS=Saccharomyces cerevisiae (strain ATCC 204508 / S288c) GN=POM33 PE=1 SV=1	2	1	NA	1	6	2	3	6.22619	3.23827	20.8739	16.0099	1.66783e-10	8.44875e-10	14.5336	0.913194	0.74182	0.74182	Total_CL - Total_NoCL	limma	1.66783e-10	8.44875e-10	TRUE	enriched hit	6.22619	FALSE	TRUE	TRUE
214	SAC6	P32599	Fimbrin OS=Saccharomyces cerevisiae (strain ATCC 204508 / S288c) GN=SAC6 PE=1 SV=1	3	1	1	1	6	3	10	6.40505	3.28732	22.4516	15.9996	1.68244e-10	8.48293e-10	14.5444	0.91325	0.74182	0.74182	Total_CL - Total_NoCL	limma	1.68244e-10	8.48293e-10	TRUE	enriched hit	6.40505	FALSE	TRUE	TRUE
215	SRP54	P20424	Signal recognition particle subunit SRP54 OS=Saccharomyces cerevisiae (strain ATCC 204508 / S288c) GN=SRP54 PE=1 SV=2	3	1	1	1	6	3	5	6.22729	4.09967	21.4846	15.9689	1.72675e-10	8.6659e-10	14.5186	0.913416	0.74182	0.74182	Total_CL - Total_NoCL	limma	1.72675e-10	8.6659e-10	TRUE	enriched hit	6.22729	FALSE	TRUE	TRUE
216	RNR4	P49723	Ribonucleoside-diphosphate reductase small chain 2 OS=Saccharomyces cerevisiae (strain ATCC 204508 / S288c) GN=RNR4 PE=1 SV=1	3	1	1	1	6	3	6	6.43632	4.1005	22.2595	15.9584	1.74215e-10	8.70268e-10	14.5098	0.913472	0.74182	0.74182	Total_CL - Total_NoCL	limma	1.74215e-10	8.70268e-10	TRUE	enriched hit	6.43632	TRUE	TRUE	FALSE
217	TIF4631	P39935	Eukaryotic initiation factor 4F subunit p150 OS=Saccharomyces cerevisiae (strain ATCC 204508 / S288c) GN=TIF4631 PE=1 SV=2	3	1	1	1	6	3	22	7.26278	4.01057	24.2844	15.9194	1.80078e-10	8.95409e-10	14.477	0.913683	0.74182	0.74182	Total_CL - Total_NoCL	limma	1.80078e-10	8.95409e-10	TRUE	enriched hit	7.26278	FALSE	TRUE	TRUE
218	FAS2	P19097	Fatty acid synthase subunit alpha OS=Saccharomyces cerevisiae (strain ATCC 204508 / S288c) GN=FAS2 PE=1 SV=2	3	1	1	1	6	3	54	7.30476	2.49255	25.7294	15.9073	1.81947e-10	9.00554e-10	14.4668	0.913749	0.74182	0.74182	Total_CL - Total_NoCL	limma	1.81947e-10	9.00554e-10	TRUE	enriched hit	7.30476	FALSE	TRUE	TRUE
219	KAR2	P16474	78 kDa glucose-regulated protein homolog OS=Saccharomyces cerevisiae (strain ATCC 204508 / S288c) GN=KAR2 PE=1 SV=1	3	1	1	1	6	3	14	6.69385	2.9582	23.956	15.879	1.86371e-10	9.14444e-10	14.4429	0.913901	0.74182	0.74182	Total_CL - Total_NoCL	limma	1.86371e-10	9.14444e-10	TRUE	enriched hit	6.69385	TRUE	TRUE	FALSE
220	RAS2	P01120	Ras-like protein 2 OS=Saccharomyces cerevisiae (strain ATCC 204508 / S288c) GN=RAS2 PE=1 SV=4	2	1	1	NA	6	2	3	6.09012	4.4204	19.967	15.8786	1.86448e-10	9.14444e-10	14.3588	0.913904	0.74182	0.74182	Total_CL - Total_NoCL	limma	1.86448e-10	9.14444e-10	TRUE	enriched hit	6.09012	TRUE	TRUE	FALSE
221	TRM8	Q12009	tRNA (guanine-N(7)-)-methyltransferase OS=Saccharomyces cerevisiae (strain ATCC 204508 / S288c) GN=TRM8 PE=1 SV=1	3	1	1	1	6	3	3	5.9483	4.86888	20.2333	15.8603	1.89374e-10	9.24592e-10	14.3816	0.914002	0.74182	0.74182	Total_CL - Total_NoCL	limma	1.89374e-10	9.24592e-10	TRUE	enriched hit	5.9483	TRUE	TRUE	FALSE
222	LYS4	P49367	Homoaconitase, mitochondrial OS=Saccharomyces cerevisiae (strain ATCC 204508 / S288c) GN=LYS4 PE=1 SV=1	3	1	1	1	6	3	5	5.74785	3.41966	21.0082	15.8487	1.91251e-10	9.27641e-10	14.4173	0.914065	0.74182	0.74182	Total_CL - Total_NoCL	limma	1.91251e-10	9.27641e-10	TRUE	enriched hit	5.74785	FALSE	TRUE	TRUE
223	PPT1	P53043	Serine/threonine-protein phosphatase T OS=Saccharomyces cerevisiae (strain ATCC 204508 / S288c) GN=PPT1 PE=1 SV=1	2	1	1	NA	6	2	2	5.7211	4.45634	19.7897	15.8459	1.91718e-10	9.27641e-10	14.3948	0.91408	0.74182	0.74182	Total_CL - Total_NoCL	limma	1.91718e-10	9.27641e-10	TRUE	enriched hit	5.7211	FALSE	TRUE	TRUE
224	TEF4	P36008	Elongation factor 1-gamma 2 OS=Saccharomyces cerevisiae (strain ATCC 204508 / S288c) GN=TEF4 PE=1 SV=1	3	1	1	1	6	3	9	7.07301	3.0393	24.1911	15.8248	1.95203e-10	9.40288e-10	14.397	0.914194	0.74182	0.74182	Total_CL - Total_NoCL	limma	1.95203e-10	9.40288e-10	TRUE	enriched hit	7.07301	TRUE	TRUE	FALSE
225	SSD1	P24276	Protein SSD1 OS=Saccharomyces cerevisiae (strain ATCC 204508 / S288c) GN=SSD1 PE=1 SV=1	3	1	1	1	6	3	10	6.18483	4.34184	21.5558	15.7814	2.02589e-10	9.71527e-10	14.3601	0.914429	0.74182	0.74182	Total_CL - Total_NoCL	limma	2.02589e-10	9.71527e-10	TRUE	enriched hit	6.18483	FALSE	TRUE	TRUE
226	TCP1	P12612	T-complex protein 1 subunit alpha OS=Saccharomyces cerevisiae (strain ATCC 204508 / S288c) GN=TCP1 PE=1 SV=2	3	1	1	1	6	3	8	6.58853	3.05412	22.6034	15.7649	2.05465e-10	9.80958e-10	14.3461	0.914517	0.74182	0.74182	Total_CL - Total_NoCL	limma	2.05465e-10	9.80958e-10	TRUE	enriched hit	6.58853	FALSE	TRUE	TRUE
227	TSR4	P25040	20S rRNA accumulation protein 4 OS=Saccharomyces cerevisiae (strain ATCC 204508 / S288c) GN=TSR4 PE=1 SV=2	2	1	NA	1	6	2	2	5.57538	4.21603	19.7785	15.737	2.10447e-10	1.00032e-09	14.1398	0.914668	0.74182	0.74182	Total_CL - Total_NoCL	limma	2.10447e-10	1.00032e-09	TRUE	enriched hit	5.57538	TRUE	TRUE	FALSE
228	CRM1	P30822	Exportin-1 OS=Saccharomyces cerevisiae (strain ATCC 204508 / S288c) GN=CRM1 PE=1 SV=1	3	1	1	1	6	3	11	6.4178	2.81086	22.918	15.725	2.12621e-10	1.00168e-09	14.3121	0.914733	0.74182	0.74182	Total_CL - Total_NoCL	limma	2.12621e-10	1.00168e-09	TRUE	enriched hit	6.4178	FALSE	TRUE	TRUE
229	ADH3	P07246	Alcohol dehydrogenase 3, mitochondrial OS=Saccharomyces cerevisiae (strain ATCC 204508 / S288c) GN=ADH3 PE=1 SV=2	3	1	1	1	6	3	10	6.39902	2.69764	23.1858	15.7231	2.12977e-10	1.00168e-09	14.3105	0.914743	0.74182	0.74182	Total_CL - Total_NoCL	limma	2.12977e-10	1.00168e-09	TRUE	enriched hit	6.39902	FALSE	TRUE	TRUE
230	SVL3	Q03088	Styryl dye vacuolar localization protein 3 OS=Saccharomyces cerevisiae (strain ATCC 204508 / S288c) GN=SVL3 PE=1 SV=1	2	1	1	NA	6	2	2	5.76357	4.69928	20.0862	15.7201	2.13518e-10	1.00168e-09	14.1265	0.914759	0.74182	0.74182	Total_CL - Total_NoCL	limma	2.13518e-10	1.00168e-09	TRUE	enriched hit	5.76357	FALSE	TRUE	TRUE
231	MRPL25	P23369	54S ribosomal protein L25, mitochondrial OS=Saccharomyces cerevisiae (strain ATCC 204508 / S288c) GN=MRPL25 PE=1 SV=2	3	1	1	1	6	3	4	5.93602	4.80513	20.603	15.7129	2.14849e-10	1.00356e-09	14.3018	0.914798	0.74182	0.74182	Total_CL - Total_NoCL	limma	2.14849e-10	1.00356e-09	TRUE	enriched hit	5.93602	FALSE	TRUE	TRUE
232	DPH5	P32469	Diphthine methyl ester synthase OS=Saccharomyces cerevisiae (strain ATCC 204508 / S288c) GN=DPH5 PE=1 SV=1	3	1	1	1	6	3	3	6.22491	3.4631	21.0429	15.6871	2.19667e-10	1.02164e-09	14.2798	0.914938	0.74182	0.74182	Total_CL - Total_NoCL	limma	2.19667e-10	1.02164e-09	TRUE	enriched hit	6.22491	FALSE	TRUE	TRUE
233	RPS7B	P48164	40S ribosomal protein S7-B OS=Saccharomyces cerevisiae (strain ATCC 204508 / S288c) GN=RPS7B PE=1 SV=1	3	1	1	1	6	3	5	6.71602	5.94382	20.3759	15.6804	2.20949e-10	1.02174e-09	14.274	0.914974	0.74182	0.74182	Total_CL - Total_NoCL	limma	2.20949e-10	1.02174e-09	TRUE	enriched hit	6.71602	FALSE	TRUE	TRUE
234	VMA5	P31412	V-type proton ATPase subunit C OS=Saccharomyces cerevisiae (strain ATCC 204508 / S288c) GN=VMA5 PE=1 SV=4	3	1	1	1	6	3	5	6.08428	4.2561	21.4977	15.6771	2.21582e-10	1.02174e-09	14.2711	0.914992	0.74182	0.74182	Total_CL - Total_NoCL	limma	2.21582e-10	1.02174e-09	TRUE	enriched hit	6.08428	TRUE	TRUE	FALSE
235	PRO1	P32264	Glutamate 5-kinase OS=Saccharomyces cerevisiae (strain ATCC 204508 / S288c) GN=PRO1 PE=1 SV=2	2	1	NA	1	6	2	3	5.77759	3.14825	21.0843	15.6359	2.29602e-10	1.05421e-09	14.2226	0.915215	0.74182	0.74182	Total_CL - Total_NoCL	limma	2.29602e-10	1.05421e-09	TRUE	enriched hit	5.77759	TRUE	TRUE	FALSE
236	RPS5	P26783	40S ribosomal protein S5 OS=Saccharomyces cerevisiae (strain ATCC 204508 / S288c) GN=RPS5 PE=1 SV=3	3	1	1	1	6	3	12	8.778	5.17547	24.0061	15.4587	2.67773e-10	1.22427e-09	14.0828	0.916172	0.74182	0.74182	Total_CL - Total_NoCL	limma	2.67773e-10	1.22427e-09	TRUE	enriched hit	8.778	FALSE	TRUE	TRUE
237	BMH1	P29311	Protein BMH1 OS=Saccharomyces cerevisiae (strain ATCC 204508 / S288c) GN=BMH1 PE=1 SV=4	2	1	1	NA	6	2	2	7.13412	4.55252	21.8994	15.438	2.7267e-10	1.24139e-09	14.0023	0.916284	0.74182	0.74182	Total_CL - Total_NoCL	limma	2.7267e-10	1.24139e-09	TRUE	enriched hit	7.13412	FALSE	TRUE	TRUE
238	ADH1	P00330	Alcohol dehydrogenase 1 OS=Saccharomyces cerevisiae (strain ATCC 204508 / S288c) GN=ADH1 PE=1 SV=5	3	1	1	1	6	3	18	8.29122	2.97479	25.1714	15.4104	2.7932e-10	1.26307e-09	14.0408	0.916433	0.74182	0.74182	Total_CL - Total_NoCL	limma	2.7932e-10	1.26307e-09	TRUE	enriched hit	8.29122	FALSE	TRUE	TRUE
239	IMD4	P50094	Inosine-5'-monophosphate dehydrogenase 4 OS=Saccharomyces cerevisiae (strain ATCC 204508 / S288c) GN=IMD4 PE=1 SV=1	2	1	1	NA	6	2	2	6.44637	2.87654	20.1706	15.4046	2.80732e-10	1.26307e-09	14.0238	0.916464	0.74182	0.74182	Total_CL - Total_NoCL	limma	2.80732e-10	1.26307e-09	TRUE	enriched hit	6.44637	TRUE	TRUE	FALSE
240	TMA108	P40462	Protein TMA108 OS=Saccharomyces cerevisiae (strain ATCC 204508 / S288c) GN=TMA108 PE=1 SV=1	3	1	1	1	6	3	6	6.19593	4.21922	21.3901	15.4038	2.80943e-10	1.26307e-09	14.035	0.916468	0.74182	0.74182	Total_CL - Total_NoCL	limma	2.80943e-10	1.26307e-09	TRUE	enriched hit	6.19593	FALSE	TRUE	TRUE
241	YHB1	P39676	Flavohemoprotein OS=Saccharomyces cerevisiae (strain ATCC 204508 / S288c) GN=YHB1 PE=1 SV=2	3	1	1	1	6	3	8	6.10982	4.1154	21.0198	15.3697	2.89453e-10	1.29593e-09	14.0044	0.916652	0.74182	0.74182	Total_CL - Total_NoCL	limma	2.89453e-10	1.29593e-09	TRUE	enriched hit	6.10982	FALSE	TRUE	TRUE
242	YCK1|YCK2	P23291|P23292	Casein kinase I homolog 1 OS=Saccharomyces cerevisiae (strain ATCC 204508 / S288c) GN=YCK1 PE=1 SV=1|Casein kinase I homolog 2 OS=Saccharomyces cerevisiae (strain ATCC 204508 / S288c) GN=YCK2 PE=1 SV=1	3	1	1	1	6	3	3	6.28915	3.26896	21.1302	15.2956	3.08951e-10	1.37751e-09	13.9407	0.917053	0.74182	0.74182	Total_CL - Total_NoCL	limma	3.08951e-10	1.37751e-09	TRUE	enriched hit	6.28915	FALSE	TRUE	TRUE
243	STO1	P34160	Nuclear cap-binding protein complex subunit 1 OS=Saccharomyces cerevisiae (strain ATCC 204508 / S288c) GN=STO1 PE=1 SV=2	3	1	1	1	6	3	6	6.15735	3.01893	21.5341	15.2693	3.16203e-10	1.40404e-09	13.9173	0.917195	0.74182	0.74182	Total_CL - Total_NoCL	limma	3.16203e-10	1.40404e-09	TRUE	enriched hit	6.15735	FALSE	TRUE	TRUE
244	NOB1	Q08444	20S-pre-rRNA D-site endonuclease NOB1 OS=Saccharomyces cerevisiae (strain ATCC 204508 / S288c) GN=NOB1 PE=1 SV=1	3	1	1	1	6	3	6	6.32849	4.6195	21.7024	15.226	3.28521e-10	1.45276e-09	13.8792	0.917429	0.74182	0.74182	Total_CL - Total_NoCL	limma	3.28521e-10	1.45276e-09	TRUE	enriched hit	6.32849	FALSE	TRUE	TRUE
245	NAT1	P12945	N-terminal acetyltransferase A complex subunit NAT1 OS=Saccharomyces cerevisiae (strain ATCC 204508 / S288c) GN=NAT1 PE=1 SV=2	3	1	1	1	6	3	10	5.98583	3.22698	22.0192	15.2178	3.30907e-10	1.45576e-09	13.872	0.917473	0.74182	0.74182	Total_CL - Total_NoCL	limma	3.30907e-10	1.45576e-09	TRUE	enriched hit	5.98583	FALSE	TRUE	TRUE
246	DEF1	P35732	RNA polymerase II degradation factor 1 OS=Saccharomyces cerevisiae (strain ATCC 204508 / S288c) GN=DEF1 PE=1 SV=1	3	1	1	1	6	3	11	7.07384	3.84727	23.6284	15.2145	3.31897e-10	1.45576e-09	13.869	0.917491	0.74182	0.74182	Total_CL - Total_NoCL	limma	3.31897e-10	1.45576e-09	TRUE	enriched hit	7.07384	FALSE	TRUE	TRUE
247	ACS2	P52910	Acetyl-coenzyme A synthetase 2 OS=Saccharomyces cerevisiae (strain ATCC 204508 / S288c) GN=ACS2 PE=1 SV=1	3	1	1	1	6	3	10	6.5018	2.85828	23.0954	15.1417	3.5402e-10	1.54651e-09	13.8046	0.917884	0.74182	0.74182	Total_CL - Total_NoCL	limma	3.5402e-10	1.54651e-09	TRUE	enriched hit	6.5018	FALSE	TRUE	TRUE
248	CBF5	P33322	H/ACA ribonucleoprotein complex subunit 4 OS=Saccharomyces cerevisiae (strain ATCC 204508 / S288c) GN=CBF5 PE=1 SV=1	3	1	1	1	6	3	13	7.02863	4.80662	22.7079	15.1248	3.59379e-10	1.56359e-09	13.7896	0.917976	0.74182	0.74182	Total_CL - Total_NoCL	limma	3.59379e-10	1.56359e-09	TRUE	enriched hit	7.02863	FALSE	TRUE	TRUE
249	MRPL49	P40858	54S ribosomal protein L49, mitochondrial OS=Saccharomyces cerevisiae (strain ATCC 204508 / S288c) GN=MRPL49 PE=1 SV=2	3	1	1	1	6	3	3	6.25112	5.67548	20.2887	15.1026	3.66569e-10	1.58847e-09	13.7699	0.918096	0.74182	0.74182	Total_CL - Total_NoCL	limma	3.66569e-10	1.58847e-09	TRUE	enriched hit	6.25112	FALSE	TRUE	TRUE
250	PUS7	Q08647	Multisubstrate pseudouridine synthase 7 OS=Saccharomyces cerevisiae (strain ATCC 204508 / S288c) GN=PUS7 PE=1 SV=1	3	1	1	1	6	3	13	6.69527	5.51433	22.7046	15.0945	3.69221e-10	1.59356e-09	13.7627	0.91814	0.74182	0.74182	Total_CL - Total_NoCL	limma	3.69221e-10	1.59356e-09	TRUE	enriched hit	6.69527	TRUE	TRUE	FALSE
251	TRP5	P00931	Tryptophan synthase OS=Saccharomyces cerevisiae (strain ATCC 204508 / S288c) GN=TRP5 PE=1 SV=1	3	1	1	1	6	3	13	6.403	2.88005	22.6842	15.0844	3.72561e-10	1.60157e-09	13.7537	0.918194	0.74182	0.74182	Total_CL - Total_NoCL	limma	3.72561e-10	1.60157e-09	TRUE	enriched hit	6.403	FALSE	TRUE	TRUE
252	RPS28B|RPS28A	P0C0X0|Q3E7X9	40S ribosomal protein S28-B OS=Saccharomyces cerevisiae (strain ATCC 204508 / S288c) GN=RPS28B PE=1 SV=1|40S ribosomal protein S28-A OS=Saccharomyces cerevisiae (strain ATCC 204508 / S288c) GN=RPS28A PE=1 SV=1	3	1	1	1	6	3	3	6.86813	5.73932	20.9108	15.0615	3.80248e-10	1.62812e-09	13.7333	0.918318	0.74182	0.74182	Total_CL - Total_NoCL	limma	3.80248e-10	1.62812e-09	TRUE	enriched hit	6.86813	TRUE	TRUE	FALSE
253	GCN1	P33892	eIF-2-alpha kinase activator GCN1 OS=Saccharomyces cerevisiae (strain ATCC 204508 / S288c) GN=GCN1 PE=1 SV=1	3	1	1	1	6	3	47	6.85853	3.34726	24.9953	15.052	3.83483e-10	1.63549e-09	13.7248	0.918369	0.74182	0.74182	Total_CL - Total_NoCL	limma	3.83483e-10	1.63549e-09	TRUE	enriched hit	6.85853	FALSE	TRUE	TRUE
254	OLA1	P38219	Obg-like ATPase 1 OS=Saccharomyces cerevisiae (strain ATCC 204508 / S288c) GN=OLA1 PE=1 SV=1	3	1	1	1	6	3	10	6.64865	3.80728	22.9538	14.9829	4.07985e-10	1.73313e-09	13.663	0.918743	0.74182	0.74182	Total_CL - Total_NoCL	limma	4.07985e-10	1.73313e-09	TRUE	enriched hit	6.64865	TRUE	TRUE	FALSE
255	BMH2	P34730	Protein BMH2 OS=Saccharomyces cerevisiae (strain ATCC 204508 / S288c) GN=BMH2 PE=1 SV=3	2	1	NA	1	6	2	3	6.58256	4.01766	21.8028	14.9779	4.09803e-10	1.73403e-09	13.6561	0.91877	0.74182	0.74182	Total_CL - Total_NoCL	limma	4.09803e-10	1.73403e-09	TRUE	enriched hit	6.58256	TRUE	TRUE	FALSE
256	SDH1	Q00711	Succinate dehydrogenase [ubiquinone] flavoprotein subunit, mitochondrial OS=Saccharomyces cerevisiae (strain ATCC 204508 / S288c) GN=SDH1 PE=1 SV=1	3	1	1	1	6	3	4	6.04506	2.95479	21.7996	14.9692	4.13013e-10	1.74042e-09	13.6507	0.918817	0.74182	0.74182	Total_CL - Total_NoCL	limma	4.13013e-10	1.74042e-09	TRUE	enriched hit	6.04506	FALSE	TRUE	TRUE
257	SRP1	Q02821	Importin subunit alpha OS=Saccharomyces cerevisiae (strain ATCC 204508 / S288c) GN=SRP1 PE=1 SV=1	2	1	1	NA	6	2	4	5.90184	3.66999	20.5329	14.9651	4.14539e-10	1.74042e-09	13.6448	0.918839	0.74182	0.74182	Total_CL - Total_NoCL	limma	4.14539e-10	1.74042e-09	TRUE	enriched hit	5.90184	TRUE	TRUE	FALSE
258	IDH1	P28834	Isocitrate dehydrogenase [NAD] subunit 1, mitochondrial OS=Saccharomyces cerevisiae (strain ATCC 204508 / S288c) GN=IDH1 PE=1 SV=2	2	1	1	NA	6	2	2	5.35168	3.0788	19.4415	14.8966	4.40892e-10	1.84389e-09	13.5797	0.919209	0.74182	0.74182	Total_CL - Total_NoCL	limma	4.40892e-10	1.84389e-09	TRUE	enriched hit	5.35168	TRUE	TRUE	FALSE
259	SEC53	P07283	Phosphomannomutase OS=Saccharomyces cerevisiae (strain ATCC 204508 / S288c) GN=SEC53 PE=1 SV=1	3	1	1	1	6	3	5	6.32002	5.22878	20.9947	14.8822	4.46651e-10	1.86076e-09	13.5547	0.919287	0.74182	0.74182	Total_CL - Total_NoCL	limma	4.46651e-10	1.86076e-09	TRUE	enriched hit	6.32002	TRUE	TRUE	FALSE
260	PFK2	P16862	ATP-dependent 6-phosphofructokinase subunit beta OS=Saccharomyces cerevisiae (strain ATCC 204508 / S288c) GN=PFK2 PE=1 SV=4	3	1	1	1	6	3	30	7.41255	2.5544	24.7574	14.8666	4.52997e-10	1.87994e-09	13.5584	0.919371	0.74182	0.74182	Total_CL - Total_NoCL	limma	4.52997e-10	1.87994e-09	TRUE	enriched hit	7.41255	FALSE	TRUE	TRUE
261	CDC3	P32457	Cell division control protein 3 OS=Saccharomyces cerevisiae (strain ATCC 204508 / S288c) GN=CDC3 PE=1 SV=3	3	1	1	1	6	3	5	5.89685	3.30675	21.6167	14.8533	4.58471e-10	1.89537e-09	13.5464	0.919443	0.74182	0.74182	Total_CL - Total_NoCL	limma	4.58471e-10	1.89537e-09	TRUE	enriched hit	5.89685	FALSE	TRUE	TRUE
262	PET9	P18239	ADP,ATP carrier protein 2 OS=Saccharomyces cerevisiae (strain ATCC 204508 / S288c) GN=PET9 PE=1 SV=2	2	1	NA	1	6	2	4	6.28925	3.68878	21.3487	14.8406	4.63804e-10	1.91009e-09	13.5346	0.919512	0.74182	0.74182	Total_CL - Total_NoCL	limma	4.63804e-10	1.91009e-09	TRUE	enriched hit	6.28925	TRUE	TRUE	FALSE
263	TMA46	Q12000	Translation machinery-associated protein 46 OS=Saccharomyces cerevisiae (strain ATCC 204508 / S288c) GN=TMA46 PE=1 SV=2	3	1	1	1	6	3	5	6.0531	3.69944	21.3974	14.8103	4.76668e-10	1.95561e-09	13.5096	0.919675	0.74182	0.74182	Total_CL - Total_NoCL	limma	4.76668e-10	1.95561e-09	TRUE	enriched hit	6.0531	FALSE	TRUE	TRUE
264	SEC4	P07560	Ras-related protein SEC4 OS=Saccharomyces cerevisiae (strain ATCC 204508 / S288c) GN=SEC4 PE=1 SV=1	3	1	1	1	6	3	8	6.52679	3.49405	22.6248	14.7624	4.97872e-10	2.03486e-09	13.4639	0.919934	0.74182	0.74182	Total_CL - Total_NoCL	limma	4.97872e-10	2.03486e-09	TRUE	enriched hit	6.52679	TRUE	TRUE	FALSE
265	HIS4	P00815	Histidine biosynthesis trifunctional protein OS=Saccharomyces cerevisiae (strain ATCC 204508 / S288c) GN=HIS4 PE=1 SV=3	3	1	1	1	6	3	12	6.34717	2.99778	22.6763	14.7353	5.10287e-10	2.07774e-09	13.4393	0.920081	0.74182	0.74182	Total_CL - Total_NoCL	limma	5.10287e-10	2.07774e-09	TRUE	enriched hit	6.34717	FALSE	TRUE	TRUE
266	RPL12A|RPL12B	P0CX53|P0CX54	60S ribosomal protein L12-A OS=Saccharomyces cerevisiae (strain ATCC 204508 / S288c) GN=RPL12A PE=1 SV=1|60S ribosomal protein L12-B OS=Saccharomyces cerevisiae (strain ATCC 204508 / S288c) GN=RPL12B PE=1 SV=1	3	1	1	1	6	3	7	6.64892	2.5931	23.2995	14.7034	5.25377e-10	2.13113e-09	13.4101	0.920254	0.74182	0.74182	Total_CL - Total_NoCL	limma	5.25377e-10	2.13113e-09	TRUE	enriched hit	6.64892	FALSE	TRUE	TRUE
267	TRM1	P15565|P15565-2	tRNA (guanine(26)-N(2))-dimethyltransferase, mitochondrial OS=Saccharomyces cerevisiae (strain ATCC 204508 / S288c) GN=TRM1 PE=1 SV=1|Isoform 2 of tRNA (guanine(26)-N(2))-dimethyltransferase, mitochondrial OS=Saccharomyces cerevisiae (strain ATCC 204508 / S288c) GN=TRM1	3	1	1	1	6	3	6	6.21456	4.75902	21.1893	14.6932	5.30254e-10	2.14286e-09	13.4009	0.920308	0.74182	0.74182	Total_CL - Total_NoCL	limma	5.30254e-10	2.14286e-09	TRUE	enriched hit	6.21456	TRUE	TRUE	FALSE
268	NOP9	P47077	Nucleolar protein 9 OS=Saccharomyces cerevisiae (strain ATCC 204508 / S288c) GN=NOP9 PE=1 SV=1	3	1	1	1	6	3	11	6.30959	3.74216	22.4537	14.6833	5.35097e-10	2.15221e-09	13.3918	0.920362	0.74182	0.74182	Total_CL - Total_NoCL	limma	5.35097e-10	2.15221e-09	TRUE	enriched hit	6.30959	FALSE	TRUE	TRUE
269	YPK1	P12688	Serine/threonine-protein kinase YPK1 OS=Saccharomyces cerevisiae (strain ATCC 204508 / S288c) GN=YPK1 PE=1 SV=2	3	1	1	1	6	3	4	5.59144	4.44798	19.9815	14.6803	5.36557e-10	2.15221e-09	13.3769	0.920378	0.74182	0.74182	Total_CL - Total_NoCL	limma	5.36557e-10	2.15221e-09	TRUE	enriched hit	5.59144	FALSE	TRUE	TRUE
270	RPS21A|RPS21B	P0C0V8|Q3E754	40S ribosomal protein S21-A OS=Saccharomyces cerevisiae (strain ATCC 204508 / S288c) GN=RPS21A PE=1 SV=1|40S ribosomal protein S21-B OS=Saccharomyces cerevisiae (strain ATCC 204508 / S288c) GN=RPS21B PE=1 SV=1	3	1	1	1	6	3	3	6.05116	3.85072	21.5163	14.6588	5.4722e-10	2.18685e-09	13.3694	0.920495	0.74182	0.74182	Total_CL - Total_NoCL	limma	5.4722e-10	2.18685e-09	TRUE	enriched hit	6.05116	TRUE	TRUE	FALSE
271	PSA1	P41940	Mannose-1-phosphate guanyltransferase OS=Saccharomyces cerevisiae (strain ATCC 204508 / S288c) GN=PSA1 PE=1 SV=2	3	1	1	1	6	3	12	7.03634	3.46986	23.2363	14.6467	5.53298e-10	2.20298e-09	13.3583	0.92056	0.74182	0.74182	Total_CL - Total_NoCL	limma	5.53298e-10	2.20298e-09	TRUE	enriched hit	7.03634	TRUE	TRUE	FALSE
272	MDH1	P17505	Malate dehydrogenase, mitochondrial OS=Saccharomyces cerevisiae (strain ATCC 204508 / S288c) GN=MDH1 PE=1 SV=2	3	1	1	1	6	3	6	6.03876	5.5007	21.0812	14.6349	5.59343e-10	2.20612e-09	13.3474	0.920624	0.74182	0.74182	Total_CL - Total_NoCL	limma	5.59343e-10	2.20612e-09	TRUE	enriched hit	6.03876	TRUE	TRUE	FALSE
273	ILV3	P39522	Dihydroxy-acid dehydratase, mitochondrial OS=Saccharomyces cerevisiae (strain ATCC 204508 / S288c) GN=ILV3 PE=1 SV=2	3	1	1	1	6	3	9	6.65563	4.00793	22.6394	14.6346	5.59496e-10	2.20612e-09	13.3471	0.920626	0.74182	0.74182	Total_CL - Total_NoCL	limma	5.59496e-10	2.20612e-09	TRUE	enriched hit	6.65563	FALSE	TRUE	TRUE
274	NIP1	P32497	Eukaryotic translation initiation factor 3 subunit C OS=Saccharomyces cerevisiae (strain ATCC 204508 / S288c) GN=NIP1 PE=1 SV=2	3	1	1	1	6	3	23	7.36945	4.12367	24.6879	14.6311	5.61271e-10	2.20612e-09	13.344	0.920644	0.74182	0.74182	Total_CL - Total_NoCL	limma	5.61271e-10	2.20612e-09	TRUE	enriched hit	7.36945	FALSE	TRUE	TRUE
275	GVP36	P40531	Protein GVP36 OS=Saccharomyces cerevisiae (strain ATCC 204508 / S288c) GN=GVP36 PE=1 SV=1	2	1	1	NA	6	2	6	6.15304	3.5942	21.3154	14.6273	5.63205e-10	2.20612e-09	13.3437	0.920665	0.74182	0.74182	Total_CL - Total_NoCL	limma	5.63205e-10	2.20612e-09	TRUE	enriched hit	6.15304	TRUE	TRUE	FALSE
276	CDC48	P25694	Cell division control protein 48 OS=Saccharomyces cerevisiae (strain ATCC 204508 / S288c) GN=CDC48 PE=1 SV=3	3	1	1	1	6	3	9	6.452	2.67276	22.6928	14.6215	5.66248e-10	2.20612e-09	13.3351	0.920696	0.74182	0.74182	Total_CL - Total_NoCL	limma	5.66248e-10	2.20612e-09	TRUE	enriched hit	6.452	TRUE	TRUE	FALSE
277	CDC33	P07260	Eukaryotic translation initiation factor 4E OS=Saccharomyces cerevisiae (strain ATCC 204508 / S288c) GN=CDC33 PE=1 SV=1	3	1	1	1	6	3	2	6.63273	4.83276	21.5661	14.6208	5.66618e-10	2.20612e-09	13.332	0.9207	0.74182	0.74182	Total_CL - Total_NoCL	limma	5.66618e-10	2.20612e-09	TRUE	enriched hit	6.63273	TRUE	TRUE	FALSE
278	POR1	P04840	Mitochondrial outer membrane protein porin 1 OS=Saccharomyces cerevisiae (strain ATCC 204508 / S288c) GN=POR1 PE=1 SV=4	2	1	1	NA	6	2	7	6.21028	2.83215	22.1863	14.6173	5.68399e-10	2.20612e-09	13.3346	0.920719	0.74182	0.74182	Total_CL - Total_NoCL	limma	5.68399e-10	2.20612e-09	TRUE	enriched hit	6.21028	FALSE	TRUE	TRUE
279	DOA1	P36037	Protein DOA1 OS=Saccharomyces cerevisiae (strain ATCC 204508 / S288c) GN=DOA1 PE=1 SV=1	3	1	1	1	6	3	13	6.49082	2.60433	23.4383	14.5972	5.78994e-10	2.23919e-09	13.3128	0.920827	0.74182	0.74182	Total_CL - Total_NoCL	limma	5.78994e-10	2.23919e-09	TRUE	enriched hit	6.49082	FALSE	TRUE	TRUE
280	SSB2	P40150	Heat shock protein SSB2 OS=Saccharomyces cerevisiae (strain ATCC 204508 / S288c) GN=SSB2 PE=1 SV=2	2	1	NA	1	6	2	2	6.97667	3.53187	21.966	14.5872	5.84368e-10	2.2519e-09	13.2134	0.920882	0.74182	0.74182	Total_CL - Total_NoCL	limma	5.84368e-10	2.2519e-09	TRUE	enriched hit	6.97667	FALSE	TRUE	TRUE
281	RPL25	P04456	60S ribosomal protein L25 OS=Saccharomyces cerevisiae (strain ATCC 204508 / S288c) GN=RPL25 PE=1 SV=4	3	1	1	1	6	3	6	7.15308	6.91254	21.631	14.5561	6.01282e-10	2.30304e-09	13.2809	0.92105	0.74182	0.74182	Total_CL - Total_NoCL	limma	6.01282e-10	2.30304e-09	TRUE	enriched hit	7.15308	FALSE	TRUE	TRUE
282	NUP157	P40064	Nucleoporin NUP157 OS=Saccharomyces cerevisiae (strain ATCC 204508 / S288c) GN=NUP157 PE=1 SV=1	2	1	1	NA	6	2	3	5.68213	2.62534	19.839	14.555	6.01906e-10	2.30304e-09	13.2771	0.921056	0.74182	0.74182	Total_CL - Total_NoCL	limma	6.01906e-10	2.30304e-09	TRUE	enriched hit	5.68213	FALSE	TRUE	TRUE
283	MON2	P48563	Protein MON2 OS=Saccharomyces cerevisiae (strain ATCC 204508 / S288c) GN=MON2 PE=1 SV=1	2	1	1	NA	6	2	5	5.57192	3.16499	20.7295	14.5476	6.06007e-10	2.31053e-09	13.2715	0.921096	0.74182	0.74182	Total_CL - Total_NoCL	limma	6.06007e-10	2.31053e-09	TRUE	enriched hit	5.57192	FALSE	TRUE	TRUE
284	ETR1	P38071	Enoyl-[acyl-carrier protein] reductase [NADPH, B-specific], mitochondrial OS=Saccharomyces cerevisiae (strain ATCC 204508 / S288c) GN=ETR1 PE=1 SV=3	2	1	1	NA	6	2	3	5.74451	3.21554	19.8553	14.5388	6.10957e-10	2.3212e-09	13.1542	0.921143	0.74182	0.74182	Total_CL - Total_NoCL	limma	6.10957e-10	2.3212e-09	TRUE	enriched hit	5.74451	FALSE	TRUE	TRUE
285	GDH1	P07262	NADP-specific glutamate dehydrogenase 1 OS=Saccharomyces cerevisiae (strain ATCC 204508 / S288c) GN=GDH1 PE=1 SV=2	3	1	1	1	6	3	15	6.92765	2.93627	23.1472	14.5278	6.17163e-10	2.33656e-09	13.2489	0.921203	0.74182	0.74182	Total_CL - Total_NoCL	limma	6.17163e-10	2.33656e-09	TRUE	enriched hit	6.92765	FALSE	TRUE	TRUE
286	RSR1	P13856	Ras-related protein RSR1 OS=Saccharomyces cerevisiae (strain ATCC 204508 / S288c) GN=RSR1 PE=3 SV=1	3	1	1	1	6	3	3	5.73861	3.78573	19.7447	14.5223	6.20317e-10	2.34029e-09	13.0931	0.921232	0.74182	0.74182	Total_CL - Total_NoCL	limma	6.20317e-10	2.34029e-09	TRUE	enriched hit	5.73861	TRUE	TRUE	FALSE
287	CCT4	P39078	T-complex protein 1 subunit delta OS=Saccharomyces cerevisiae (strain ATCC 204508 / S288c) GN=CCT4 PE=1 SV=2	3	1	1	1	6	3	10	6.47635	3.2693	22.3445	14.4821	6.43794e-10	2.4204e-09	13.2065	0.92145	0.74182	0.74182	Total_CL - Total_NoCL	limma	6.43794e-10	2.4204e-09	TRUE	enriched hit	6.47635	FALSE	TRUE	TRUE
288	LRO1	P40345	Phospholipid:diacylglycerol acyltransferase OS=Saccharomyces cerevisiae (strain ATCC 204508 / S288c) GN=LRO1 PE=1 SV=1	2	1	1	NA	6	2	2	5.59349	3.41622	19.8432	14.4553	6.59974e-10	2.47261e-09	13.1847	0.921595	0.74182	0.74182	Total_CL - Total_NoCL	limma	6.59974e-10	2.47261e-09	TRUE	enriched hit	5.59349	FALSE	TRUE	TRUE
289	IPP1	P00817	Inorganic pyrophosphatase OS=Saccharomyces cerevisiae (strain ATCC 204508 / S288c) GN=IPP1 PE=1 SV=4	3	1	1	1	6	3	8	6.13393	2.91727	22.1536	14.4489	6.63857e-10	2.47855e-09	13.1758	0.921629	0.74182	0.74182	Total_CL - Total_NoCL	limma	6.63857e-10	2.47855e-09	TRUE	enriched hit	6.13393	TRUE	TRUE	FALSE
290	SPB4	P25808	ATP-dependent rRNA helicase SPB4 OS=Saccharomyces cerevisiae (strain ATCC 204508 / S288c) GN=SPB4 PE=1 SV=1	3	1	1	1	6	3	4	5.71172	3.67893	20.2048	14.437	6.71263e-10	2.49756e-09	13.1655	0.921694	0.74182	0.74182	Total_CL - Total_NoCL	limma	6.71263e-10	2.49756e-09	TRUE	enriched hit	5.71172	FALSE	TRUE	TRUE
291	YRA1	Q12159	RNA annealing protein YRA1 OS=Saccharomyces cerevisiae (strain ATCC 204508 / S288c) GN=YRA1 PE=1 SV=2	3	1	1	1	6	3	9	6.75077	4.33921	23.4573	14.4108	6.87784e-10	2.55024e-09	13.1402	0.921835	0.74182	0.74182	Total_CL - Total_NoCL	limma	6.87784e-10	2.55024e-09	TRUE	enriched hit	6.75077	FALSE	TRUE	TRUE
292	SEC21	P32074	Coatomer subunit gamma OS=Saccharomyces cerevisiae (strain ATCC 204508 / S288c) GN=SEC21 PE=1 SV=2	3	1	1	1	6	3	12	6.02629	3.04708	21.8039	14.3746	7.11328e-10	2.6285e-09	13.1065	0.922031	0.74182	0.74182	Total_CL - Total_NoCL	limma	7.11328e-10	2.6285e-09	TRUE	enriched hit	6.02629	FALSE	TRUE	TRUE
293	IDP1	P21954	Isocitrate dehydrogenase [NADP], mitochondrial OS=Saccharomyces cerevisiae (strain ATCC 204508 / S288c) GN=IDP1 PE=1 SV=1	3	1	1	1	6	3	6	6.20305	3.42856	21.6063	14.3114	7.54522e-10	2.7786e-09	13.0473	0.922373	0.74182	0.74182	Total_CL - Total_NoCL	limma	7.54522e-10	2.7786e-09	TRUE	enriched hit	6.20305	FALSE	TRUE	TRUE
294	ASP1	P38986	L-asparaginase 1 OS=Saccharomyces cerevisiae (strain ATCC 204508 / S288c) GN=ASP1 PE=1 SV=1	3	1	1	1	6	3	4	5.88666	3.76281	20.7474	14.2753	7.8041e-10	2.85457e-09	13.0144	0.922568	0.74182	0.74182	Total_CL - Total_NoCL	limma	7.8041e-10	2.85457e-09	TRUE	enriched hit	5.88666	FALSE	TRUE	TRUE
295	ASC1	P38011	Guanine nucleotide-binding protein subunit beta-like protein OS=Saccharomyces cerevisiae (strain ATCC 204508 / S288c) GN=ASC1 PE=1 SV=4	3	1	1	1	6	3	10	7.83884	3.25649	23.7264	14.2746	7.80935e-10	2.85457e-09	13.0128	0.922572	0.74182	0.74182	Total_CL - Total_NoCL	limma	7.80935e-10	2.85457e-09	TRUE	enriched hit	7.83884	FALSE	TRUE	TRUE
296	ACC1	Q00955	Acetyl-CoA carboxylase OS=Saccharomyces cerevisiae (strain ATCC 204508 / S288c) GN=ACC1 PE=1 SV=2	3	1	1	1	6	3	48	7.22866	2.84762	25.3687	14.2716	7.83089e-10	2.85457e-09	13.01	0.922588	0.74182	0.74182	Total_CL - Total_NoCL	limma	7.83089e-10	2.85457e-09	TRUE	enriched hit	7.22866	FALSE	TRUE	TRUE
297	ADE3	P07245	C-1-tetrahydrofolate synthase, cytoplasmic OS=Saccharomyces cerevisiae (strain ATCC 204508 / S288c) GN=ADE3 PE=1 SV=1	3	1	1	1	6	3	8	6.28004	3.16358	22.4324	14.2655	7.87621e-10	2.86142e-09	13.0042	0.922621	0.74182	0.74182	Total_CL - Total_NoCL	limma	7.87621e-10	2.86142e-09	TRUE	enriched hit	6.28004	FALSE	TRUE	TRUE
298	ARO2	P28777	Chorismate synthase OS=Saccharomyces cerevisiae (strain ATCC 204508 / S288c) GN=ARO2 PE=1 SV=1	3	1	1	1	6	3	6	6.11546	4.2989	20.8179	14.2519	7.97705e-10	2.88834e-09	12.9915	0.922694	0.74182	0.74182	Total_CL - Total_NoCL	limma	7.97705e-10	2.88834e-09	TRUE	enriched hit	6.11546	TRUE	TRUE	FALSE
299	RAT1	Q02792	5'-3' exoribonuclease 2 OS=Saccharomyces cerevisiae (strain ATCC 204508 / S288c) GN=RAT1 PE=1 SV=3	2	1	1	NA	6	2	5	5.9298	3.58098	20.3262	14.2275	8.16149e-10	2.94523e-09	12.9779	0.922826	0.74182	0.74182	Total_CL - Total_NoCL	limma	8.16149e-10	2.94523e-09	TRUE	enriched hit	5.9298	FALSE	TRUE	TRUE
300	SKI2	P35207	Antiviral helicase SKI2 OS=Saccharomyces cerevisiae (strain ATCC 204508 / S288c) GN=SKI2 PE=1 SV=2	3	1	1	1	6	3	10	6.16268	3.83345	21.8395	14.1741	8.58225e-10	3.08675e-09	12.918	0.923115	0.74182	0.74182	Total_CL - Total_NoCL	limma	8.58225e-10	3.08675e-09	TRUE	enriched hit	6.16268	FALSE	TRUE	TRUE
301	RPT1	P33299	26S protease regulatory subunit 7 homolog OS=Saccharomyces cerevisiae (strain ATCC 204508 / S288c) GN=RPT1 PE=1 SV=1	3	1	1	1	6	3	6	6.19741	2.74445	21.6455	14.1597	8.69992e-10	3.11868e-09	12.9043	0.923193	0.74182	0.74182	Total_CL - Total_NoCL	limma	8.69992e-10	3.11868e-09	TRUE	enriched hit	6.19741	FALSE	TRUE	TRUE
302	SSA2	P10592	Heat shock protein SSA2 OS=Saccharomyces cerevisiae (strain ATCC 204508 / S288c) GN=SSA2 PE=1 SV=3	3	1	1	1	6	3	7	7.04421	3.4847	23.2346	14.1536	8.74975e-10	3.12615e-09	12.8986	0.923226	0.74182	0.74182	Total_CL - Total_NoCL	limma	8.74975e-10	3.12615e-09	TRUE	enriched hit	7.04421	TRUE	TRUE	FALSE
303	ATP1	P07251	ATP synthase subunit alpha, mitochondrial OS=Saccharomyces cerevisiae (strain ATCC 204508 / S288c) GN=ATP1 PE=1 SV=5	3	1	1	1	6	3	10	6.47539	2.33288	22.8497	14.1482	8.79494e-10	3.13193e-09	12.8934	0.923255	0.74182	0.74182	Total_CL - Total_NoCL	limma	8.79494e-10	3.13193e-09	TRUE	enriched hit	6.47539	FALSE	TRUE	TRUE
304	CDC10	P25342	Cell division control protein 10 OS=Saccharomyces cerevisiae (strain ATCC 204508 / S288c) GN=CDC10 PE=1 SV=1	2	1	1	NA	6	2	2	5.55643	3.57251	19.7831	14.1416	8.84915e-10	3.14087e-09	12.8975	0.923291	0.74182	0.74182	Total_CL - Total_NoCL	limma	8.84915e-10	3.14087e-09	TRUE	enriched hit	5.55643	TRUE	TRUE	FALSE
305	ADK1	P07170	Adenylate kinase OS=Saccharomyces cerevisiae (strain ATCC 204508 / S288c) GN=ADK1 PE=1 SV=2	3	1	1	1	6	3	4	6.22141	5.42428	20.5645	14.1253	8.98699e-10	3.17933e-09	12.8753	0.923379	0.74182	0.74182	Total_CL - Total_NoCL	limma	8.98699e-10	3.17933e-09	TRUE	enriched hit	6.22141	TRUE	TRUE	FALSE
306	MIS1	P09440	C-1-tetrahydrofolate synthase, mitochondrial OS=Saccharomyces cerevisiae (strain ATCC 204508 / S288c) GN=MIS1 PE=1 SV=1	3	1	1	1	6	3	11	6.43414	3.20805	22.818	14.0902	9.29011e-10	3.27583e-09	12.8384	0.923569	0.74182	0.74182	Total_CL - Total_NoCL	limma	9.29011e-10	3.27583e-09	TRUE	enriched hit	6.43414	FALSE	TRUE	TRUE
307	ASN1	P49089	Asparagine synthetase [glutamine-hydrolyzing] 1 OS=Saccharomyces cerevisiae (strain ATCC 204508 / S288c) GN=ASN1 PE=1 SV=2	3	1	1	1	6	3	9	6.73818	2.96462	23.15	14.0794	9.38596e-10	3.29885e-09	12.828	0.923627	0.74182	0.74182	Total_CL - Total_NoCL	limma	9.38596e-10	3.29885e-09	TRUE	enriched hit	6.73818	TRUE	TRUE	FALSE
308	RPL13B|RPL13A	P40212|Q12690	60S ribosomal protein L13-B OS=Saccharomyces cerevisiae (strain ATCC 204508 / S288c) GN=RPL13B PE=1 SV=1|60S ribosomal protein L13-A OS=Saccharomyces cerevisiae (strain ATCC 204508 / S288c) GN=RPL13A PE=1 SV=1	3	1	1	1	6	3	7	7.40011	3.61625	23.2022	14.0396	9.74767e-10	3.41485e-09	12.79	0.923843	0.74182	0.74182	Total_CL - Total_NoCL	limma	9.74767e-10	3.41485e-09	TRUE	enriched hit	7.40011	FALSE	TRUE	TRUE
309	VPS1	P21576	Vacuolar protein sorting-associated protein 1 OS=Saccharomyces cerevisiae (strain ATCC 204508 / S288c) GN=VPS1 PE=1 SV=2	3	1	1	1	6	3	7	6.08347	3.89485	21.4575	14.0216	9.91547e-10	3.46239e-09	12.7729	0.92394	0.74182	0.74182	Total_CL - Total_NoCL	limma	9.91547e-10	3.46239e-09	TRUE	enriched hit	6.08347	FALSE	TRUE	TRUE
310	RPS12	P48589	40S ribosomal protein S12 OS=Saccharomyces cerevisiae (strain ATCC 204508 / S288c) GN=RPS12 PE=1 SV=1	3	1	1	1	6	3	5	6.59747	4.3281	22.274	14.0164	9.96476e-10	3.46838e-09	12.7679	0.923968	0.74182	0.74182	Total_CL - Total_NoCL	limma	9.96476e-10	3.46838e-09	TRUE	enriched hit	6.59747	FALSE	TRUE	TRUE
311	SLX9	P53251	Ribosome biogenesis protein SLX9 OS=Saccharomyces cerevisiae (strain ATCC 204508 / S288c) GN=SLX9 PE=1 SV=1	3	1	1	1	6	3	3	5.79896	4.11349	20.6629	13.978	1.0336e-09	3.57616e-09	12.7311	0.924176	0.74182	0.74182	Total_CL - Total_NoCL	limma	1.0336e-09	3.57616e-09	TRUE	enriched hit	5.79896	FALSE	TRUE	TRUE
312	APA1	P16550	Protein APA1 OS=Saccharomyces cerevisiae (strain ATCC 204508 / S288c) GN=APA1 PE=1 SV=4	3	1	1	1	6	3	3	6.02461	4.32605	21.5618	13.9775	1.03407e-09	3.57616e-09	12.7306	0.924178	0.74182	0.74182	Total_CL - Total_NoCL	limma	1.03407e-09	3.57616e-09	TRUE	enriched hit	6.02461	FALSE	TRUE	TRUE
313	RPL28	P02406	60S ribosomal protein L28 OS=Saccharomyces cerevisiae (strain ATCC 204508 / S288c) GN=RPL28 PE=1 SV=3	3	1	1	1	6	3	7	7.39321	5.31953	22.0534	13.9731	1.03847e-09	3.57702e-09	12.7306	0.924202	0.74182	0.74182	Total_CL - Total_NoCL	limma	1.03847e-09	3.57702e-09	TRUE	enriched hit	7.39321	FALSE	TRUE	TRUE
314	RPO31	P04051	DNA-directed RNA polymerase III subunit RPC1 OS=Saccharomyces cerevisiae (strain ATCC 204508 / S288c) GN=RPO31 PE=1 SV=1	3	1	1	1	6	3	12	5.96631	2.94586	21.8349	13.9706	1.04095e-09	3.57702e-09	12.724	0.924216	0.74182	0.74182	Total_CL - Total_NoCL	limma	1.04095e-09	3.57702e-09	TRUE	enriched hit	5.96631	FALSE	TRUE	TRUE
315	SEC23	P15303	Protein transport protein SEC23 OS=Saccharomyces cerevisiae (strain ATCC 204508 / S288c) GN=SEC23 PE=1 SV=1	3	1	1	1	6	3	9	6.35768	3.1653	21.7496	13.9663	1.04517e-09	3.58011e-09	12.7199	0.924239	0.74182	0.74182	Total_CL - Total_NoCL	limma	1.04517e-09	3.58011e-09	TRUE	enriched hit	6.35768	FALSE	TRUE	TRUE
316	YNL010W	P53981	Uncharacterized phosphatase YNL010W OS=Saccharomyces cerevisiae (strain ATCC 204508 / S288c) GN=YNL010W PE=1 SV=1	3	1	1	1	6	3	4	6.43646	5.89787	20.637	13.9321	1.07991e-09	3.68743e-09	12.6374	0.924424	0.74182	0.74182	Total_CL - Total_NoCL	limma	1.07991e-09	3.68743e-09	TRUE	enriched hit	6.43646	TRUE	TRUE	FALSE
317	GCD7	P32502	Translation initiation factor eIF-2B subunit beta OS=Saccharomyces cerevisiae (strain ATCC 204508 / S288c) GN=GCD7 PE=1 SV=1	2	1	1	NA	6	2	3	5.82014	3.88553	20.8898	13.9226	1.08978e-09	3.70937e-09	12.6919	0.924475	0.74182	0.74182	Total_CL - Total_NoCL	limma	1.08978e-09	3.70937e-09	TRUE	enriched hit	5.82014	FALSE	TRUE	TRUE
318	NOP4	P37838	Nucleolar protein 4 OS=Saccharomyces cerevisiae (strain ATCC 204508 / S288c) GN=NOP4 PE=1 SV=1	3	1	1	1	6	3	13	6.38245	3.88915	22.7141	13.9103	1.10267e-09	3.74145e-09	12.666	0.924542	0.74182	0.74182	Total_CL - Total_NoCL	limma	1.10267e-09	3.74145e-09	TRUE	enriched hit	6.38245	FALSE	TRUE	TRUE
319	ALD6	P54115	Magnesium-activated aldehyde dehydrogenase, cytosolic OS=Saccharomyces cerevisiae (strain ATCC 204508 / S288c) GN=ALD6 PE=1 SV=4	3	1	1	1	6	3	16	7.51717	3.05369	24.5617	13.8843	1.1305e-09	3.82386e-09	12.6409	0.924682	0.74182	0.74182	Total_CL - Total_NoCL	limma	1.1305e-09	3.82386e-09	TRUE	enriched hit	7.51717	TRUE	TRUE	FALSE
320	CWH41	P53008	Mannosyl-oligosaccharide glucosidase OS=Saccharomyces cerevisiae (strain ATCC 204508 / S288c) GN=CWH41 PE=1 SV=1	3	1	1	1	6	3	5	5.86003	2.9026	21.1803	13.8792	1.13609e-09	3.82502e-09	12.6371	0.92471	0.74182	0.74182	Total_CL - Total_NoCL	limma	1.13609e-09	3.82502e-09	TRUE	enriched hit	5.86003	FALSE	TRUE	TRUE
321	RPL37A	P49166	60S ribosomal protein L37-A OS=Saccharomyces cerevisiae (strain ATCC 204508 / S288c) GN=RPL37A PE=1 SV=2	3	1	1	1	6	3	2	7.48552	6.09201	21.2868	13.8775	1.13793e-09	3.82502e-09	12.647	0.924719	0.74182	0.74182	Total_CL - Total_NoCL	limma	1.13793e-09	3.82502e-09	TRUE	enriched hit	7.48552	TRUE	TRUE	FALSE
322	GLR1	P41921|P41921-2	Glutathione reductase OS=Saccharomyces cerevisiae (strain ATCC 204508 / S288c) GN=GLR1 PE=1 SV=2|Isoform 2 of Glutathione reductase OS=Saccharomyces cerevisiae (strain ATCC 204508 / S288c) GN=GLR1	3	1	1	1	6	3	8	6.58034	2.971	22.8248	13.8569	1.16065e-09	3.88092e-09	12.6144	0.92483	0.74182	0.74182	Total_CL - Total_NoCL	limma	1.16065e-09	3.88092e-09	TRUE	enriched hit	6.58034	TRUE	TRUE	FALSE
323	DPM1	P14020	Dolichol-phosphate mannosyltransferase OS=Saccharomyces cerevisiae (strain ATCC 204508 / S288c) GN=DPM1 PE=1 SV=3	3	1	1	1	6	3	6	6.32493	3.77804	22.0663	13.8559	1.16176e-09	3.88092e-09	12.6134	0.924836	0.74182	0.74182	Total_CL - Total_NoCL	limma	1.16176e-09	3.88092e-09	TRUE	enriched hit	6.32493	FALSE	TRUE	TRUE
324	GPP1	P41277	Glycerol-1-phosphate phosphohydrolase 1 OS=Saccharomyces cerevisiae (strain ATCC 204508 / S288c) GN=GPP1 PE=1 SV=3	3	1	1	1	6	3	6	6.92607	3.41004	22.3636	13.84	1.17964e-09	3.9285e-09	12.5981	0.924922	0.74182	0.74182	Total_CL - Total_NoCL	limma	1.17964e-09	3.9285e-09	TRUE	enriched hit	6.92607	FALSE	TRUE	TRUE
325	TUP1	P16649	General transcriptional corepressor TUP1 OS=Saccharomyces cerevisiae (strain ATCC 204508 / S288c) GN=TUP1 PE=1 SV=2	3	1	1	1	6	3	11	6.70837	2.60256	23.4809	13.8315	1.18935e-09	3.94073e-09	12.5898	0.924968	0.74182	0.74182	Total_CL - Total_NoCL	limma	1.18935e-09	3.94073e-09	TRUE	enriched hit	6.70837	FALSE	TRUE	TRUE
326	YGR250C	P53316	Uncharacterized RNA-binding protein YGR250C OS=Saccharomyces cerevisiae (strain ATCC 204508 / S288c) GN=YGR250C PE=1 SV=1	3	1	1	1	6	3	7	6.007	4.9007	20.6092	13.8289	1.19232e-09	3.94073e-09	12.6017	0.924982	0.74182	0.74182	Total_CL - Total_NoCL	limma	1.19232e-09	3.94073e-09	TRUE	enriched hit	6.007	FALSE	TRUE	TRUE
327	ADE16	P54113	Bifunctional purine biosynthesis protein ADE16 OS=Saccharomyces cerevisiae (strain ATCC 204508 / S288c) GN=ADE16 PE=1 SV=1	2	1	1	NA	6	2	4	5.84912	3.80576	20.4318	13.8272	1.19427e-09	3.94073e-09	12.6012	0.924991	0.74182	0.74182	Total_CL - Total_NoCL	limma	1.19427e-09	3.94073e-09	TRUE	enriched hit	5.84912	FALSE	TRUE	TRUE
328	CAM1	P29547	Elongation factor 1-gamma 1 OS=Saccharomyces cerevisiae (strain ATCC 204508 / S288c) GN=CAM1 PE=1 SV=2	3	1	1	1	6	3	6	6.20535	3.62316	21.8114	13.8082	1.21638e-09	4.00146e-09	12.5672	0.925094	0.74182	0.74182	Total_CL - Total_NoCL	limma	1.21638e-09	4.00146e-09	TRUE	enriched hit	6.20535	TRUE	TRUE	FALSE
329	LEU4	P06208|P06208-2	2-isopropylmalate synthase OS=Saccharomyces cerevisiae (strain ATCC 204508 / S288c) GN=LEU4 PE=1 SV=1|Isoform Cytoplasmic of 2-isopropylmalate synthase OS=Saccharomyces cerevisiae (strain ATCC 204508 / S288c) GN=LEU4	3	1	1	1	6	3	9	6.31204	2.88615	22.4997	13.8002	1.2258e-09	4.02018e-09	12.5594	0.925137	0.74182	0.74182	Total_CL - Total_NoCL	limma	1.2258e-09	4.02018e-09	TRUE	enriched hit	6.31204	FALSE	TRUE	TRUE
330	HEM1	P09950	5-aminolevulinate synthase, mitochondrial OS=Saccharomyces cerevisiae (strain ATCC 204508 / S288c) GN=HEM1 PE=1 SV=1	2	1	1	NA	6	2	2	6.04885	3.65865	20.3967	13.7956	1.23122e-09	4.02572e-09	12.571	0.925162	0.74182	0.74182	Total_CL - Total_NoCL	limma	1.23122e-09	4.02572e-09	TRUE	enriched hit	6.04885	FALSE	TRUE	TRUE
331	SCS2	P40075	Vesicle-associated membrane protein-associated protein SCS2 OS=Saccharomyces cerevisiae (strain ATCC 204508 / S288c) GN=SCS2 PE=1 SV=3	3	1	1	1	6	3	5	6.25621	4.51106	21.5143	13.781	1.24877e-09	4.07076e-09	12.5407	0.925241	0.74182	0.74182	Total_CL - Total_NoCL	limma	1.24877e-09	4.07076e-09	TRUE	enriched hit	6.25621	TRUE	TRUE	FALSE
332	URA7	P28274	CTP synthase 1 OS=Saccharomyces cerevisiae (strain ATCC 204508 / S288c) GN=URA7 PE=1 SV=2	3	1	1	1	6	3	6	6.1734	2.86317	21.7977	13.7698	1.26227e-09	4.10237e-09	12.5299	0.925301	0.74182	0.74182	Total_CL - Total_NoCL	limma	1.26227e-09	4.10237e-09	TRUE	enriched hit	6.1734	FALSE	TRUE	TRUE
333	NOP13	P53883	Nucleolar protein 13 OS=Saccharomyces cerevisiae (strain ATCC 204508 / S288c) GN=NOP13 PE=1 SV=2	3	1	1	1	6	3	10	6.51527	4.5526	22.5624	13.7656	1.2675e-09	4.107e-09	12.5257	0.925325	0.74182	0.74182	Total_CL - Total_NoCL	limma	1.2675e-09	4.107e-09	TRUE	enriched hit	6.51527	FALSE	TRUE	TRUE
334	CCT7	P42943	T-complex protein 1 subunit eta OS=Saccharomyces cerevisiae (strain ATCC 204508 / S288c) GN=CCT7 PE=1 SV=1	3	1	1	1	6	3	3	5.84577	3.5571	19.4996	13.7469	1.29058e-09	4.16582e-09	12.5088	0.925425	0.74182	0.74182	Total_CL - Total_NoCL	limma	1.29058e-09	4.16582e-09	TRUE	enriched hit	5.84577	FALSE	TRUE	TRUE
335	MIR1	P23641	Mitochondrial phosphate carrier protein OS=Saccharomyces cerevisiae (strain ATCC 204508 / S288c) GN=MIR1 PE=1 SV=1	3	1	1	1	6	3	3	6.14426	4.21555	19.5666	13.744	1.29427e-09	4.16582e-09	12.508	0.925441	0.74182	0.74182	Total_CL - Total_NoCL	limma	1.29427e-09	4.16582e-09	TRUE	enriched hit	6.14426	TRUE	TRUE	FALSE
336	EPS1	P40557	ER-retained PMA1-suppressing protein 1 OS=Saccharomyces cerevisiae (strain ATCC 204508 / S288c) GN=EPS1 PE=1 SV=1	2	1	1	NA	6	2	3	5.62518	3.13445	20.1926	13.7416	1.29723e-09	4.16582e-09	12.5193	0.925454	0.74182	0.74182	Total_CL - Total_NoCL	limma	1.29723e-09	4.16582e-09	TRUE	enriched hit	5.62518	FALSE	TRUE	TRUE
337	PRT1	P06103	Eukaryotic translation initiation factor 3 subunit B OS=Saccharomyces cerevisiae (strain ATCC 204508 / S288c) GN=PRT1 PE=1 SV=1	3	1	1	1	6	3	11	6.60863	3.69771	22.5255	13.6753	1.38335e-09	4.42919e-09	12.4376	0.925813	0.74182	0.74182	Total_CL - Total_NoCL	limma	1.38335e-09	4.42919e-09	TRUE	enriched hit	6.60863	FALSE	TRUE	TRUE
338	RIC1	P40395	Guanine nucleotide exchange factor subunit RIC1 OS=Saccharomyces cerevisiae (strain ATCC 204508 / S288c) GN=RIC1 PE=1 SV=1	2	1	1	NA	6	2	3	5.7167	3.20824	19.1961	13.6644	1.39813e-09	4.46326e-09	12.4292	0.925872	0.74182	0.74182	Total_CL - Total_NoCL	limma	1.39813e-09	4.46326e-09	TRUE	enriched hit	5.7167	FALSE	TRUE	TRUE
339	YGR054W	P53235	Eukaryotic translation initiation factor 2A OS=Saccharomyces cerevisiae (strain ATCC 204508 / S288c) GN=YGR054W PE=1 SV=1	3	1	1	1	6	3	6	6.00844	4.35276	20.8639	13.6549	1.41118e-09	4.48513e-09	12.4188	0.925923	0.74182	0.74182	Total_CL - Total_NoCL	limma	1.41118e-09	4.48513e-09	TRUE	enriched hit	6.00844	FALSE	TRUE	TRUE
340	ELP3	Q02908	Elongator complex protein 3 OS=Saccharomyces cerevisiae (strain ATCC 204508 / S288c) GN=ELP3 PE=1 SV=1	3	1	1	1	6	3	6	5.93391	2.89379	21.6775	13.6533	1.41329e-09	4.48513e-09	12.416	0.925932	0.74182	0.74182	Total_CL - Total_NoCL	limma	1.41329e-09	4.48513e-09	TRUE	enriched hit	5.93391	FALSE	TRUE	TRUE
341	SHE10	P53075	Outer spore wall assembly protein SHE10 OS=Saccharomyces cerevisiae (strain ATCC 204508 / S288c) GN=SHE10 PE=1 SV=1	3	1	1	1	6	3	6	6.10767	3.63318	21.6408	13.6257	1.45188e-09	4.59408e-09	12.3888	0.926081	0.74182	0.74182	Total_CL - Total_NoCL	limma	1.45188e-09	4.59408e-09	TRUE	enriched hit	6.10767	FALSE	TRUE	TRUE
342	MRP7	P12687	54S ribosomal protein L2, mitochondrial OS=Saccharomyces cerevisiae (strain ATCC 204508 / S288c) GN=MRP7 PE=1 SV=1	3	1	1	1	6	3	3	5.84286	4.39516	19.7596	13.6143	1.46813e-09	4.6319e-09	12.3835	0.926143	0.74182	0.74182	Total_CL - Total_NoCL	limma	1.46813e-09	4.6319e-09	TRUE	enriched hit	5.84286	FALSE	TRUE	TRUE
343	QCR2	P07257	Cytochrome b-c1 complex subunit 2, mitochondrial OS=Saccharomyces cerevisiae (strain ATCC 204508 / S288c) GN=QCR2 PE=1 SV=1	2	1	1	NA	5	2	4	5.48357	3.34233	20.5205	13.6051	1.48141e-09	4.66019e-09	12.3878	0.926193	0.74182	0.74182	Total_CL - Total_NoCL	limma	1.48141e-09	4.66019e-09	TRUE	enriched hit	5.48357	TRUE	TRUE	FALSE
344	HYR1	P40581	Peroxiredoxin HYR1 OS=Saccharomyces cerevisiae (strain ATCC 204508 / S288c) GN=HYR1 PE=1 SV=1	3	1	1	1	6	3	2	5.94126	4.85663	20.6299	13.5766	1.52323e-09	4.7778e-09	12.3404	0.926347	0.74182	0.74182	Total_CL - Total_NoCL	limma	1.52323e-09	4.7778e-09	TRUE	enriched hit	5.94126	TRUE	TRUE	FALSE
345	HIS1	P00498	ATP phosphoribosyltransferase OS=Saccharomyces cerevisiae (strain ATCC 204508 / S288c) GN=HIS1 PE=1 SV=1	2	1	NA	1	6	2	3	6.03507	3.10375	20.9014	13.5702	1.53277e-09	4.79378e-09	12.354	0.926381	0.74182	0.74182	Total_CL - Total_NoCL	limma	1.53277e-09	4.79378e-09	TRUE	enriched hit	6.03507	FALSE	TRUE	TRUE
346	ENO1	P00924	Enolase 1 OS=Saccharomyces cerevisiae (strain ATCC 204508 / S288c) GN=ENO1 PE=1 SV=3	3	1	1	1	6	3	4	6.62504	3.54293	21.3771	13.5572	1.55239e-09	4.84112e-09	12.3213	0.926452	0.74182	0.74182	Total_CL - Total_NoCL	limma	1.55239e-09	4.84112e-09	TRUE	enriched hit	6.62504	TRUE	TRUE	FALSE
347	TRP3	P00937	Multifunctional tryptophan biosynthesis protein OS=Saccharomyces cerevisiae (strain ATCC 204508 / S288c) GN=TRP3 PE=1 SV=2	3	1	1	1	6	3	4	6.12293	3.56066	20.8506	13.5484	1.56588e-09	4.85705e-09	12.3126	0.926499	0.74182	0.74182	Total_CL - Total_NoCL	limma	1.56588e-09	4.85705e-09	TRUE	enriched hit	6.12293	FALSE	TRUE	TRUE
348	CAJ1	P39101	Protein CAJ1 OS=Saccharomyces cerevisiae (strain ATCC 204508 / S288c) GN=CAJ1 PE=1 SV=1	3	1	1	1	6	3	3	5.73946	4.36111	20.1325	13.548	1.5665e-09	4.85705e-09	12.3122	0.926502	0.74182	0.74182	Total_CL - Total_NoCL	limma	1.5665e-09	4.85705e-09	TRUE	enriched hit	5.73946	FALSE	TRUE	TRUE
349	UBA1	P22515	Ubiquitin-activating enzyme E1 1 OS=Saccharomyces cerevisiae (strain ATCC 204508 / S288c) GN=UBA1 PE=1 SV=2	3	1	1	1	6	3	13	6.49698	2.68994	23.453	13.5207	1.60895e-09	4.97439e-09	12.2852	0.926649	0.74182	0.74182	Total_CL - Total_NoCL	limma	1.60895e-09	4.97439e-09	TRUE	enriched hit	6.49698	FALSE	TRUE	TRUE
350	CDS1	P38221	Phosphatidate cytidylyltransferase OS=Saccharomyces cerevisiae (strain ATCC 204508 / S288c) GN=CDS1 PE=1 SV=1	3	1	1	1	6	3	4	7.0994	3.05181	22.2138	13.4703	1.69073e-09	5.21228e-09	12.2366	0.926922	0.74182	0.74182	Total_CL - Total_NoCL	limma	1.69073e-09	5.21228e-09	TRUE	enriched hit	7.0994	TRUE	TRUE	FALSE
351	TIF34	P40217	Eukaryotic translation initiation factor 3 subunit I OS=Saccharomyces cerevisiae (strain ATCC 204508 / S288c) GN=TIF34 PE=1 SV=1	3	1	1	1	6	3	11	6.63172	4.20876	22.2209	13.4565	1.71397e-09	5.26887e-09	12.2214	0.926997	0.74182	0.74182	Total_CL - Total_NoCL	limma	1.71397e-09	5.26887e-09	TRUE	enriched hit	6.63172	TRUE	TRUE	FALSE
352	YPT1	P01123	GTP-binding protein YPT1 OS=Saccharomyces cerevisiae (strain ATCC 204508 / S288c) GN=YPT1 PE=1 SV=2	3	1	1	1	6	3	6	7.04767	3.08033	23.5305	13.4228	1.77179e-09	5.43114e-09	12.1879	0.927178	0.74182	0.74182	Total_CL - Total_NoCL	limma	1.77179e-09	5.43114e-09	TRUE	enriched hit	7.04767	FALSE	TRUE	TRUE
353	HSP60	P19882	Heat shock protein 60, mitochondrial OS=Saccharomyces cerevisiae (strain ATCC 204508 / S288c) GN=HSP60 PE=1 SV=1	3	1	1	1	6	3	17	6.67189	2.22199	23.8225	13.415	1.78563e-09	5.45805e-09	12.18	0.927221	0.74182	0.74182	Total_CL - Total_NoCL	limma	1.78563e-09	5.45805e-09	TRUE	enriched hit	6.67189	FALSE	TRUE	TRUE
354	SSE1	P32589	Heat shock protein homolog SSE1 OS=Saccharomyces cerevisiae (strain ATCC 204508 / S288c) GN=SSE1 PE=1 SV=4	3	1	1	1	6	3	28	7.14782	2.38722	25.3327	13.4078	1.79838e-09	5.48151e-09	12.1728	0.92726	0.74182	0.74182	Total_CL - Total_NoCL	limma	1.79838e-09	5.48151e-09	TRUE	enriched hit	7.14782	FALSE	TRUE	TRUE
355	KTR1	P27810	Alpha-1,2 mannosyltransferase KTR1 OS=Saccharomyces cerevisiae (strain ATCC 204508 / S288c) GN=KTR1 PE=1 SV=1	3	1	1	1	6	3	5	6.1028	2.65573	21.6232	13.4044	1.80443e-09	5.48446e-09	12.1695	0.927278	0.74182	0.74182	Total_CL - Total_NoCL	limma	1.80443e-09	5.48446e-09	TRUE	enriched hit	6.1028	FALSE	TRUE	TRUE
356	TDH2	P00358	Glyceraldehyde-3-phosphate dehydrogenase 2 OS=Saccharomyces cerevisiae (strain ATCC 204508 / S288c) GN=TDH2 PE=1 SV=3	3	1	1	1	6	3	3	7.31873	4.10965	21.6465	13.4006	1.81114e-09	5.48937e-09	12.1657	0.927299	0.74182	0.74182	Total_CL - Total_NoCL	limma	1.81114e-09	5.48937e-09	TRUE	enriched hit	7.31873	TRUE	TRUE	FALSE
357	AHA1	Q12449	Hsp90 co-chaperone AHA1 OS=Saccharomyces cerevisiae (strain ATCC 204508 / S288c) GN=AHA1 PE=1 SV=1	3	1	1	1	6	3	6	6.46606	3.98538	21.9927	13.3816	1.84553e-09	5.57796e-09	12.1467	0.927401	0.74182	0.74182	Total_CL - Total_NoCL	limma	1.84553e-09	5.57796e-09	TRUE	enriched hit	6.46606	FALSE	TRUE	TRUE
358	RPL16B	P26785	60S ribosomal protein L16-B OS=Saccharomyces cerevisiae (strain ATCC 204508 / S288c) GN=RPL16B PE=1 SV=3	3	1	1	1	6	3	12	8.51902	7.34501	23.4271	13.3781	1.85196e-09	5.58175e-09	12.1432	0.92742	0.74182	0.74182	Total_CL - Total_NoCL	limma	1.85196e-09	5.58175e-09	TRUE	enriched hit	8.51902	FALSE	TRUE	TRUE
359	GCD11	P32481	Eukaryotic translation initiation factor 2 subunit gamma OS=Saccharomyces cerevisiae (strain ATCC 204508 / S288c) GN=GCD11 PE=1 SV=1	3	1	1	1	6	3	10	6.38959	3.72017	22.5748	13.3634	1.87925e-09	5.6327e-09	12.1284	0.9275	0.74182	0.74182	Total_CL - Total_NoCL	limma	1.87925e-09	5.6327e-09	TRUE	enriched hit	6.38959	TRUE	TRUE	FALSE
360	RRP5	Q05022	rRNA biogenesis protein RRP5 OS=Saccharomyces cerevisiae (strain ATCC 204508 / S288c) GN=RRP5 PE=1 SV=1	3	1	1	1	6	3	57	7.16019	3.7994	25.42	13.3633	1.87931e-09	5.6327e-09	12.1284	0.9275	0.74182	0.74182	Total_CL - Total_NoCL	limma	1.87931e-09	5.6327e-09	TRUE	enriched hit	7.16019	FALSE	TRUE	TRUE
361	MAP2	P38174	Methionine aminopeptidase 2 OS=Saccharomyces cerevisiae (strain ATCC 204508 / S288c) GN=MAP2 PE=1 SV=4	3	1	1	1	6	3	3	5.98717	3.91818	21.334	13.3379	1.92743e-09	5.75184e-09	12.1028	0.927638	0.74182	0.74182	Total_CL - Total_NoCL	limma	1.92743e-09	5.75184e-09	TRUE	enriched hit	5.98717	FALSE	TRUE	TRUE
362	KRR1	P25586	KRR1 small subunit processome component OS=Saccharomyces cerevisiae (strain ATCC 204508 / S288c) GN=KRR1 PE=1 SV=1	2	1	1	NA	6	2	3	5.67767	3.1626	20.5532	13.3367	1.92972e-09	5.75184e-09	12.1245	0.927645	0.74182	0.74182	Total_CL - Total_NoCL	limma	1.92972e-09	5.75184e-09	TRUE	enriched hit	5.67767	FALSE	TRUE	TRUE
363	GCS1	P35197	ADP-ribosylation factor GTPase-activating protein GCS1 OS=Saccharomyces cerevisiae (strain ATCC 204508 / S288c) GN=GCS1 PE=1 SV=1	3	1	1	1	6	3	3	5.99478	4.26435	20.3032	13.3201	1.96185e-09	5.8315e-09	12.0717	0.927735	0.74182	0.74182	Total_CL - Total_NoCL	limma	1.96185e-09	5.8315e-09	TRUE	enriched hit	5.99478	TRUE	TRUE	FALSE
364	TIF3	P34167	Eukaryotic translation initiation factor 4B OS=Saccharomyces cerevisiae (strain ATCC 204508 / S288c) GN=TIF3 PE=1 SV=1	3	1	1	1	6	3	16	7.14299	3.89146	24.021	13.3155	1.97069e-09	5.84169e-09	12.0804	0.927759	0.74182	0.74182	Total_CL - Total_NoCL	limma	1.97069e-09	5.84169e-09	TRUE	enriched hit	7.14299	FALSE	TRUE	TRUE
365	SUI3	P09064	Eukaryotic translation initiation factor 2 subunit beta OS=Saccharomyces cerevisiae (strain ATCC 204508 / S288c) GN=SUI3 PE=1 SV=2	3	1	1	1	6	3	9	6.62633	4.05235	22.9233	13.2966	2.00825e-09	5.93672e-09	12.0613	0.927862	0.74182	0.74182	Total_CL - Total_NoCL	limma	2.00825e-09	5.93672e-09	TRUE	enriched hit	6.62633	FALSE	TRUE	TRUE
366	HIS7	P33734	Imidazole glycerol phosphate synthase hisHF OS=Saccharomyces cerevisiae (strain ATCC 204508 / S288c) GN=HIS7 PE=1 SV=2	2	1	1	NA	6	2	4	5.68777	3.43121	20.184	13.283	2.03568e-09	6.00136e-09	12.0713	0.927935	0.74182	0.74182	Total_CL - Total_NoCL	limma	2.03568e-09	6.00136e-09	TRUE	enriched hit	5.68777	TRUE	TRUE	FALSE
367	MAK5	P38112	ATP-dependent RNA helicase MAK5 OS=Saccharomyces cerevisiae (strain ATCC 204508 / S288c) GN=MAK5 PE=1 SV=1	3	1	1	1	6	3	5	5.83592	2.83675	22.1013	13.2712	2.05961e-09	6.05537e-09	12.0358	0.927999	0.74182	0.74182	Total_CL - Total_NoCL	limma	2.05961e-09	6.05537e-09	TRUE	enriched hit	5.83592	FALSE	TRUE	TRUE
368	YLR225C	Q05948	Uncharacterized SVF1-like protein YLR225C OS=Saccharomyces cerevisiae (strain ATCC 204508 / S288c) GN=YLR225C PE=1 SV=1	2	1	1	NA	6	2	3	5.87605	2.69182	20.7558	13.2627	2.0772e-09	6.09049e-09	12.0512	0.928045	0.74182	0.74182	Total_CL - Total_NoCL	limma	2.0772e-09	6.09049e-09	TRUE	enriched hit	5.87605	FALSE	TRUE	TRUE
369	GFA1	P14742	Glutamine--fructose-6-phosphate aminotransferase [isomerizing] OS=Saccharomyces cerevisiae (strain ATCC 204508 / S288c) GN=GFA1 PE=1 SV=4	3	1	1	1	6	3	10	6.45394	3.17585	22.218	13.2556	2.09202e-09	6.11731e-09	12.02	0.928083	0.74182	0.74182	Total_CL - Total_NoCL	limma	2.09202e-09	6.11731e-09	TRUE	enriched hit	6.45394	FALSE	TRUE	TRUE
370	FUM1	P08417	Fumarate hydratase, mitochondrial OS=Saccharomyces cerevisiae (strain ATCC 204508 / S288c) GN=FUM1 PE=1 SV=2	3	1	1	1	6	3	3	5.76713	2.83625	21.099	13.1901	2.23379e-09	6.5142e-09	11.9538	0.928438	0.74182	0.74182	Total_CL - Total_NoCL	limma	2.23379e-09	6.5142e-09	TRUE	enriched hit	5.76713	FALSE	TRUE	TRUE
371	GNP1	P48813	High-affinity glutamine permease OS=Saccharomyces cerevisiae (strain ATCC 204508 / S288c) GN=GNP1 PE=1 SV=2	3	1	1	1	6	3	14	6.87926	2.24986	23.4669	13.1868	2.24109e-09	6.51788e-09	11.9505	0.928455	0.74182	0.74182	Total_CL - Total_NoCL	limma	2.24109e-09	6.51788e-09	TRUE	enriched hit	6.87926	FALSE	TRUE	TRUE
372	MAE1	P36013	NAD-dependent malic enzyme, mitochondrial OS=Saccharomyces cerevisiae (strain ATCC 204508 / S288c) GN=MAE1 PE=1 SV=1	2	1	1	NA	6	2	2	5.74678	3.50923	19.6251	13.1794	2.25795e-09	6.54926e-09	11.968	0.928496	0.74182	0.74182	Total_CL - Total_NoCL	limma	2.25795e-09	6.54926e-09	TRUE	enriched hit	5.74678	FALSE	TRUE	TRUE
373	TIM44	Q01852	Mitochondrial import inner membrane translocase subunit TIM44 OS=Saccharomyces cerevisiae (strain ATCC 204508 / S288c) GN=TIM44 PE=1 SV=1	3	1	1	1	6	3	4	5.8687	3.01382	21.5066	13.1532	2.3182e-09	6.706e-09	11.9162	0.928638	0.74182	0.74182	Total_CL - Total_NoCL	limma	2.3182e-09	6.706e-09	TRUE	enriched hit	5.8687	TRUE	TRUE	FALSE
374	CPS1	P27614	Carboxypeptidase S OS=Saccharomyces cerevisiae (strain ATCC 204508 / S288c) GN=CPS1 PE=1 SV=2	3	1	1	1	6	3	7	6.4585	2.32691	22.6297	13.1188	2.39983e-09	6.92357e-09	11.8812	0.928824	0.74182	0.74182	Total_CL - Total_NoCL	limma	2.39983e-09	6.92357e-09	TRUE	enriched hit	6.4585	FALSE	TRUE	TRUE
375	RSA4	P25382	Ribosome assembly protein 4 OS=Saccharomyces cerevisiae (strain ATCC 204508 / S288c) GN=RSA4 PE=1 SV=3	3	1	1	1	6	3	7	6.44917	2.78901	21.9652	13.1088	2.42409e-09	6.97493e-09	11.8711	0.928878	0.74182	0.74182	Total_CL - Total_NoCL	limma	2.42409e-09	6.97493e-09	TRUE	enriched hit	6.44917	FALSE	TRUE	TRUE
376	UTP4	Q06679	U3 small nucleolar RNA-associated protein 4 OS=Saccharomyces cerevisiae (strain ATCC 204508 / S288c) GN=UTP4 PE=1 SV=1	3	1	1	1	6	3	7	6.80729	2.39785	21.7554	13.0996	2.44661e-09	7.02098e-09	11.8617	0.928927	0.74182	0.74182	Total_CL - Total_NoCL	limma	2.44661e-09	7.02098e-09	TRUE	enriched hit	6.80729	FALSE	TRUE	TRUE
377	ERG1	P32476	Squalene monooxygenase OS=Saccharomyces cerevisiae (strain ATCC 204508 / S288c) GN=ERG1 PE=1 SV=2	3	1	1	1	6	3	6	6.18716	3.37571	21.5914	13.0931	2.46272e-09	7.04848e-09	11.8551	0.928962	0.74182	0.74182	Total_CL - Total_NoCL	limma	2.46272e-09	7.04848e-09	TRUE	enriched hit	6.18716	FALSE	TRUE	TRUE
378	WRS1	Q12109	Tryptophan--tRNA ligase, cytoplasmic OS=Saccharomyces cerevisiae (strain ATCC 204508 / S288c) GN=WRS1 PE=1 SV=1	3	1	1	1	6	3	7	6.19794	3.61903	22.381	13.0625	2.54004e-09	7.25053e-09	11.8238	0.929128	0.74182	0.74182	Total_CL - Total_NoCL	limma	2.54004e-09	7.25053e-09	TRUE	enriched hit	6.19794	TRUE	TRUE	FALSE
379	RFA1	P22336	Replication factor A protein 1 OS=Saccharomyces cerevisiae (strain ATCC 204508 / S288c) GN=RFA1 PE=1 SV=1	3	1	1	1	6	3	9	6.24842	4.31482	21.7392	13.042	2.59341e-09	7.38336e-09	11.8027	0.929239	0.74182	0.74182	Total_CL - Total_NoCL	limma	2.59341e-09	7.38336e-09	TRUE	enriched hit	6.24842	TRUE	TRUE	FALSE
380	RVB2	Q12464	RuvB-like protein 2 OS=Saccharomyces cerevisiae (strain ATCC 204508 / S288c) GN=RVB2 PE=1 SV=1	3	1	1	1	6	3	6	6.18262	2.5455	21.8067	13.0225	2.64517e-09	7.51089e-09	11.7827	0.929345	0.74182	0.74182	Total_CL - Total_NoCL	limma	2.64517e-09	7.51089e-09	TRUE	enriched hit	6.18262	TRUE	TRUE	FALSE
381	HXT1	P32465	Low-affinity glucose transporter HXT1 OS=Saccharomyces cerevisiae (strain ATCC 204508 / S288c) GN=HXT1 PE=1 SV=1	3	1	1	1	6	3	5	6.62468	2.42951	21.9617	12.9926	2.72677e-09	7.72226e-09	11.7537	0.929507	0.74182	0.74182	Total_CL - Total_NoCL	limma	2.72677e-09	7.72226e-09	TRUE	enriched hit	6.62468	FALSE	TRUE	TRUE
382	CPR1	P14832	Peptidyl-prolyl cis-trans isomerase OS=Saccharomyces cerevisiae (strain ATCC 204508 / S288c) GN=CPR1 PE=1 SV=3	2	1	1	NA	6	2	3	5.92758	3.67445	20.2337	12.898	3.00256e-09	8.46904e-09	11.6836	0.930018	0.74182	0.74182	Total_CL - Total_NoCL	limma	3.00256e-09	8.46904e-09	TRUE	enriched hit	5.92758	TRUE	TRUE	FALSE
383	DBP3	P20447	ATP-dependent RNA helicase DBP3 OS=Saccharomyces cerevisiae (strain ATCC 204508 / S288c) GN=DBP3 PE=1 SV=2	3	1	1	1	6	3	5	5.98489	2.79308	21.7207	12.8969	3.00616e-09	8.46904e-09	11.6532	0.930025	0.74182	0.74182	Total_CL - Total_NoCL	limma	3.00616e-09	8.46904e-09	TRUE	enriched hit	5.98489	FALSE	TRUE	TRUE
384	BRE5	P53741	UBP3-associated protein BRE5 OS=Saccharomyces cerevisiae (strain ATCC 204508 / S288c) GN=BRE5 PE=1 SV=1	3	1	1	1	6	3	14	6.73043	6.14384	22.1574	12.8687	3.09402e-09	8.69386e-09	11.624	0.930177	0.74182	0.74182	Total_CL - Total_NoCL	limma	3.09402e-09	8.69386e-09	TRUE	enriched hit	6.73043	FALSE	TRUE	TRUE
385	NOP14	Q99207	Nucleolar complex protein 14 OS=Saccharomyces cerevisiae (strain ATCC 204508 / S288c) GN=NOP14 PE=1 SV=1	2	1	1	NA	6	2	2	6.09761	2.50803	21.6974	12.8453	3.16915e-09	8.88185e-09	11.6296	0.930304	0.74182	0.74182	Total_CL - Total_NoCL	limma	3.16915e-09	8.88185e-09	TRUE	enriched hit	6.09761	FALSE	TRUE	TRUE
386	GPD1	Q00055	Glycerol-3-phosphate dehydrogenase [NAD(+)] 1 OS=Saccharomyces cerevisiae (strain ATCC 204508 / S288c) GN=GPD1 PE=1 SV=4	3	1	1	1	6	3	5	6.36271	3.33526	20.9676	12.8211	3.24892e-09	9.08181e-09	11.5745	0.930435	0.74182	0.74182	Total_CL - Total_NoCL	limma	3.24892e-09	9.08181e-09	TRUE	enriched hit	6.36271	FALSE	TRUE	TRUE
387	YMR027W	Q04371	Protein-glutamate O-methyltransferase OS=Saccharomyces cerevisiae (strain ATCC 204508 / S288c) GN=YMR027W PE=1 SV=1	3	1	1	1	6	3	6	6.03219	3.65779	20.583	12.815	3.26938e-09	9.11541e-09	11.5886	0.930468	0.74182	0.74182	Total_CL - Total_NoCL	limma	3.26938e-09	9.11541e-09	TRUE	enriched hit	6.03219	TRUE	TRUE	FALSE
388	RPL34B|RPL34A	P40525|P87262	60S ribosomal protein L34-B OS=Saccharomyces cerevisiae (strain ATCC 204508 / S288c) GN=RPL34B PE=1 SV=1|60S ribosomal protein L34-A OS=Saccharomyces cerevisiae (strain ATCC 204508 / S288c) GN=RPL34A PE=1 SV=1	3	1	1	1	6	3	6	7.6253	7.15499	22.0168	12.8068	3.29692e-09	9.16849e-09	11.5596	0.930512	0.74182	0.74182	Total_CL - Total_NoCL	limma	3.29692e-09	9.16849e-09	TRUE	enriched hit	7.6253	FALSE	TRUE	TRUE
389	YGR125W	P53273	Uncharacterized vacuolar membrane protein YGR125W OS=Saccharomyces cerevisiae (strain ATCC 204508 / S288c) GN=YGR125W PE=1 SV=1	2	1	1	NA	6	2	2	5.59336	3.23659	19.0356	12.8015	3.31524e-09	9.17452e-09	11.5902	0.930541	0.74182	0.74182	Total_CL - Total_NoCL	limma	3.31524e-09	9.17452e-09	TRUE	enriched hit	5.59336	FALSE	TRUE	TRUE
390	NGL2	Q03264	RNA exonuclease NGL2 OS=Saccharomyces cerevisiae (strain ATCC 204508 / S288c) GN=NGL2 PE=1 SV=1	3	1	1	1	6	3	4	5.68705	4.73428	19.3916	12.7998	3.32091e-09	9.17452e-09	11.5882	0.93055	0.74182	0.74182	Total_CL - Total_NoCL	limma	3.32091e-09	9.17452e-09	TRUE	enriched hit	5.68705	FALSE	TRUE	TRUE
391	SST2	P11972	Protein SST2 OS=Saccharomyces cerevisiae (strain ATCC 204508 / S288c) GN=SST2 PE=1 SV=2	3	1	1	1	6	3	7	6.18721	4.1633	22.1022	12.7987	3.3246e-09	9.17452e-09	11.5511	0.930556	0.74182	0.74182	Total_CL - Total_NoCL	limma	3.3246e-09	9.17452e-09	TRUE	enriched hit	6.18721	FALSE	TRUE	TRUE
392	TIF11	P38912	Eukaryotic translation initiation factor 1A OS=Saccharomyces cerevisiae (strain ATCC 204508 / S288c) GN=TIF11 PE=1 SV=1	3	1	1	1	6	3	5	6.97767	4.91102	22.5202	12.7798	3.39009e-09	9.33139e-09	11.5314	0.930658	0.74182	0.74182	Total_CL - Total_NoCL	limma	3.39009e-09	9.33139e-09	TRUE	enriched hit	6.97767	FALSE	TRUE	TRUE
393	DBP10	Q12389	ATP-dependent RNA helicase DBP10 OS=Saccharomyces cerevisiae (strain ATCC 204508 / S288c) GN=DBP10 PE=1 SV=2	3	1	1	1	6	3	14	6.26363	4.07689	22.0181	12.7705	3.42263e-09	9.397e-09	11.5217	0.930708	0.74182	0.74182	Total_CL - Total_NoCL	limma	3.42263e-09	9.397e-09	TRUE	enriched hit	6.26363	FALSE	TRUE	TRUE
394	AHP1	P38013	Peroxiredoxin type-2 OS=Saccharomyces cerevisiae (strain ATCC 204508 / S288c) GN=AHP1 PE=1 SV=4	3	1	1	1	6	3	5	6.32856	3.3283	22.1366	12.7413	3.52739e-09	9.66005e-09	11.4911	0.930867	0.74182	0.74182	Total_CL - Total_NoCL	limma	3.52739e-09	9.66005e-09	TRUE	enriched hit	6.32856	FALSE	TRUE	TRUE
395	EGD2	P38879	Nascent polypeptide-associated complex subunit alpha OS=Saccharomyces cerevisiae (strain ATCC 204508 / S288c) GN=EGD2 PE=1 SV=3	3	1	1	1	6	3	4	6.42149	3.57627	20.9602	12.7268	3.58077e-09	9.78141e-09	11.4831	0.930945	0.74182	0.74182	Total_CL - Total_NoCL	limma	3.58077e-09	9.78141e-09	TRUE	enriched hit	6.42149	FALSE	TRUE	TRUE
396	FAS1	P07149	Fatty acid synthase subunit beta OS=Saccharomyces cerevisiae (strain ATCC 204508 / S288c) GN=FAS1 PE=1 SV=2	3	1	1	1	6	3	45	7.3376	2.4422	25.0883	12.7094	3.64565e-09	9.93349e-09	11.4577	0.931039	0.74182	0.74182	Total_CL - Total_NoCL	limma	3.64565e-09	9.93349e-09	TRUE	enriched hit	7.3376	FALSE	TRUE	TRUE
397	RPP0	P05317	60S acidic ribosomal protein P0 OS=Saccharomyces cerevisiae (strain ATCC 204508 / S288c) GN=RPP0 PE=1 SV=2	3	1	1	1	6	3	11	7.13962	3.29122	24.5007	12.6832	3.74606e-09	1.01813e-08	11.4301	0.931181	0.74182	0.74182	Total_CL - Total_NoCL	limma	3.74606e-09	1.01813e-08	TRUE	enriched hit	7.13962	TRUE	TRUE	FALSE
398	DNF1	P32660	Phospholipid-transporting ATPase DNF1 OS=Saccharomyces cerevisiae (strain ATCC 204508 / S288c) GN=DNF1 PE=1 SV=2	3	1	1	1	6	3	9	6.0312	2.50027	21.6828	12.6655	3.81545e-09	1.03439e-08	11.4115	0.931277	0.74182	0.74182	Total_CL - Total_NoCL	limma	3.81545e-09	1.03439e-08	TRUE	enriched hit	6.0312	FALSE	TRUE	TRUE
399	EAP1	P36041	Protein EAP1 OS=Saccharomyces cerevisiae (strain ATCC 204508 / S288c) GN=EAP1 PE=1 SV=1	3	1	1	1	6	3	2	5.72585	3.16188	19.6097	12.6208	3.9972e-09	1.08095e-08	11.4057	0.931519	0.74182	0.74182	Total_CL - Total_NoCL	limma	3.9972e-09	1.08095e-08	TRUE	enriched hit	5.72585	FALSE	TRUE	TRUE
400	MUP1	P50276	High-affinity methionine permease OS=Saccharomyces cerevisiae (strain ATCC 204508 / S288c) GN=MUP1 PE=1 SV=1	3	1	1	1	6	3	4	6.07242	2.45334	20.4055	12.6178	4.00969e-09	1.08161e-08	11.3658	0.931535	0.74182	0.74182	Total_CL - Total_NoCL	limma	4.00969e-09	1.08161e-08	TRUE	enriched hit	6.07242	FALSE	TRUE	TRUE
401	PUS1	Q12211	tRNA pseudouridine synthase 1 OS=Saccharomyces cerevisiae (strain ATCC 204508 / S288c) GN=PUS1 PE=1 SV=1	3	1	1	1	6	3	4	6.79756	3.9297	22.4402	12.5893	4.1307e-09	1.10713e-08	11.3384	0.931689	0.74182	0.74182	Total_CL - Total_NoCL	limma	4.1307e-09	1.10713e-08	TRUE	enriched hit	6.79756	TRUE	TRUE	FALSE
402	NCE102	Q12207	Non-classical export protein 2 OS=Saccharomyces cerevisiae (strain ATCC 204508 / S288c) GN=NCE102 PE=1 SV=1	2	1	1	NA	6	2	3	6.40397	2.71472	20.8857	12.5889	4.13237e-09	1.10713e-08	11.3641	0.931692	0.74182	0.74182	Total_CL - Total_NoCL	limma	4.13237e-09	1.10713e-08	TRUE	enriched hit	6.40397	FALSE	TRUE	TRUE
403	SUP35	P05453	Eukaryotic peptide chain release factor GTP-binding subunit OS=Saccharomyces cerevisiae (strain ATCC 204508 / S288c) GN=SUP35 PE=1 SV=1	3	1	1	1	6	3	12	7.46911	3.47523	24.5676	12.5882	4.13507e-09	1.10713e-08	11.3299	0.931695	0.74182	0.74182	Total_CL - Total_NoCL	limma	4.13507e-09	1.10713e-08	TRUE	enriched hit	7.46911	FALSE	TRUE	TRUE
404	DBP5	P20449	ATP-dependent RNA helicase DBP5 OS=Saccharomyces cerevisiae (strain ATCC 204508 / S288c) GN=DBP5 PE=1 SV=2	3	1	1	1	6	3	4	5.64471	3.59822	20.0796	12.5807	4.16788e-09	1.11315e-08	11.3646	0.931736	0.74182	0.74182	Total_CL - Total_NoCL	limma	4.16788e-09	1.11315e-08	TRUE	enriched hit	5.64471	TRUE	TRUE	FALSE
405	RQC2	Q12532	Ribosome quality control complex subunit 2 OS=Saccharomyces cerevisiae (strain ATCC 204508 / S288c) GN=RQC2 PE=1 SV=1	3	1	1	1	6	3	15	6.41123	3.74108	22.9912	12.5542	4.2849e-09	1.14158e-08	11.2937	0.931879	0.74182	0.74182	Total_CL - Total_NoCL	limma	4.2849e-09	1.14158e-08	TRUE	enriched hit	6.41123	FALSE	TRUE	TRUE
406	DUS3	Q06053	tRNA-dihydrouridine(47) synthase [NAD(P)(+)] OS=Saccharomyces cerevisiae (strain ATCC 204508 / S288c) GN=DUS3 PE=1 SV=2	3	1	1	1	6	3	11	6.63612	2.66812	23.6682	12.5429	4.33568e-09	1.15227e-08	11.2818	0.93194	0.74182	0.74182	Total_CL - Total_NoCL	limma	4.33568e-09	1.15227e-08	TRUE	enriched hit	6.63612	TRUE	TRUE	FALSE
407	USO1	P25386	Intracellular protein transport protein USO1 OS=Saccharomyces cerevisiae (strain ATCC 204508 / S288c) GN=USO1 PE=1 SV=2	3	1	1	1	6	3	22	6.18374	2.78996	22.9786	12.5112	4.48217e-09	1.18827e-08	11.248	0.932112	0.74182	0.74182	Total_CL - Total_NoCL	limma	4.48217e-09	1.18827e-08	TRUE	enriched hit	6.18374	FALSE	TRUE	TRUE
408	PTR2	P32901	Peptide transporter PTR2 OS=Saccharomyces cerevisiae (strain ATCC 204508 / S288c) GN=PTR2 PE=1 SV=2	3	1	1	1	6	3	8	6.82421	2.51895	22.2373	12.5046	4.51353e-09	1.19365e-08	11.241	0.932148	0.74182	0.74182	Total_CL - Total_NoCL	limma	4.51353e-09	1.19365e-08	TRUE	enriched hit	6.82421	FALSE	TRUE	TRUE
409	FRS2	P15625	Phenylalanine--tRNA ligase alpha subunit OS=Saccharomyces cerevisiae (strain ATCC 204508 / S288c) GN=FRS2 PE=1 SV=3	3	1	1	1	6	3	14	6.69756	4.08283	23.2418	12.4687	4.68696e-09	1.23649e-08	11.2027	0.932342	0.74182	0.74182	Total_CL - Total_NoCL	limma	4.68696e-09	1.23649e-08	TRUE	enriched hit	6.69756	TRUE	TRUE	FALSE
410	TRM9	P49957	tRNA (carboxymethyluridine(34)-5-O)-methyltransferase OS=Saccharomyces cerevisiae (strain ATCC 204508 / S288c) GN=TRM9 PE=1 SV=1	3	1	1	1	6	3	2	6.16419	3.23219	19.6821	12.4503	4.77853e-09	1.25757e-08	11.2292	0.932442	0.74182	0.74182	Total_CL - Total_NoCL	limma	4.77853e-09	1.25757e-08	TRUE	enriched hit	6.16419	TRUE	TRUE	FALSE
411	FRD1	P32614	Fumarate reductase 1 OS=Saccharomyces cerevisiae (strain ATCC 204508 / S288c) GN=FRD1 PE=1 SV=1	2	1	1	NA	6	2	5	6.26745	4.1321	21.2671	12.3828	5.13187e-09	1.34727e-08	11.147	0.932807	0.74182	0.74182	Total_CL - Total_NoCL	limma	5.13187e-09	1.34727e-08	TRUE	enriched hit	6.26745	TRUE	TRUE	FALSE
412	NAN1	Q02931	NET1-associated nuclear protein 1 OS=Saccharomyces cerevisiae (strain ATCC 204508 / S288c) GN=NAN1 PE=1 SV=1	3	1	1	1	6	3	7	6.26326	3.01232	22.2616	12.3443	5.34547e-09	1.39994e-08	11.0691	0.933016	0.74182	0.74182	Total_CL - Total_NoCL	limma	5.34547e-09	1.39994e-08	TRUE	enriched hit	6.26326	FALSE	TRUE	TRUE
413	SEC24	P40482	Protein transport protein SEC24 OS=Saccharomyces cerevisiae (strain ATCC 204508 / S288c) GN=SEC24 PE=1 SV=1	3	1	1	1	6	3	7	6.20981	3.08404	22.2761	12.3347	5.4002e-09	1.41085e-08	11.0587	0.933067	0.74182	0.74182	Total_CL - Total_NoCL	limma	5.4002e-09	1.41085e-08	TRUE	enriched hit	6.20981	FALSE	TRUE	TRUE
414	PGI1	P12709	Glucose-6-phosphate isomerase OS=Saccharomyces cerevisiae (strain ATCC 204508 / S288c) GN=PGI1 PE=1 SV=3	3	1	1	1	6	3	12	7.46175	2.40196	23.5581	12.3304	5.42478e-09	1.41385e-08	11.0541	0.933091	0.74182	0.74182	Total_CL - Total_NoCL	limma	5.42478e-09	1.41385e-08	TRUE	enriched hit	7.46175	FALSE	TRUE	TRUE
415	DRE2	P36152	Fe-S cluster assembly protein DRE2 OS=Saccharomyces cerevisiae (strain ATCC 204508 / S288c) GN=DRE2 PE=1 SV=1	3	1	1	1	6	3	3	5.76107	4.38437	20.3314	12.3269	5.445e-09	1.4157e-08	11.0584	0.93311	0.74182	0.74182	Total_CL - Total_NoCL	limma	5.445e-09	1.4157e-08	TRUE	enriched hit	5.76107	TRUE	TRUE	FALSE
416	STE2	D6VTK4	Pheromone alpha factor receptor OS=Saccharomyces cerevisiae (strain ATCC 204508 / S288c) GN=STE2 PE=1 SV=2	3	1	1	1	6	3	7	6.68446	2.43347	22.0798	12.3211	5.4788e-09	1.42106e-08	11.0462	0.933141	0.74182	0.74182	Total_CL - Total_NoCL	limma	5.4788e-09	1.42106e-08	TRUE	enriched hit	6.68446	FALSE	TRUE	TRUE
417	ADE6	P38972	Phosphoribosylformylglycinamidine synthase OS=Saccharomyces cerevisiae (strain ATCC 204508 / S288c) GN=ADE6 PE=1 SV=2	3	1	1	1	6	3	12	6.64511	2.35215	22.8824	12.2966	5.62355e-09	1.45511e-08	11.0175	0.933274	0.74182	0.74182	Total_CL - Total_NoCL	limma	5.62355e-09	1.45511e-08	TRUE	enriched hit	6.64511	FALSE	TRUE	TRUE
418	TSR1	Q07381	Ribosome biogenesis protein TSR1 OS=Saccharomyces cerevisiae (strain ATCC 204508 / S288c) GN=TSR1 PE=1 SV=1	3	1	1	1	6	3	7	6.26026	3.36528	22.16	12.2925	5.64792e-09	1.45792e-08	11.0131	0.933296	0.74182	0.74182	Total_CL - Total_NoCL	limma	5.64792e-09	1.45792e-08	TRUE	enriched hit	6.26026	FALSE	TRUE	TRUE
419	YML6	P51998	54S ribosomal protein YmL6, mitochondrial OS=Saccharomyces cerevisiae (strain ATCC 204508 / S288c) GN=YML6 PE=1 SV=1	3	1	1	1	6	3	5	5.58274	4.64802	19.5919	12.2887	5.67105e-09	1.46022e-08	11.0467	0.933317	0.74182	0.74182	Total_CL - Total_NoCL	limma	5.67105e-09	1.46022e-08	TRUE	enriched hit	5.58274	FALSE	TRUE	TRUE
420	URB1	P34241	Nucleolar pre-ribosomal-associated protein 1 OS=Saccharomyces cerevisiae (strain ATCC 204508 / S288c) GN=URB1 PE=1 SV=2	3	1	1	1	6	3	11	6.06632	3.21944	21.9103	12.2865	5.6839e-09	1.46022e-08	11.0067	0.933328	0.74182	0.74182	Total_CL - Total_NoCL	limma	5.6839e-09	1.46022e-08	TRUE	enriched hit	6.06632	FALSE	TRUE	TRUE
421	YKL100C	P34248	Probable intramembrane protease YKL100C OS=Saccharomyces cerevisiae (strain ATCC 204508 / S288c) GN=YKL100C PE=1 SV=1	3	1	1	1	6	3	3	6.27041	2.63821	20.2737	12.2786	5.73244e-09	1.46919e-08	11.0019	0.933371	0.74182	0.74182	Total_CL - Total_NoCL	limma	5.73244e-09	1.46919e-08	TRUE	enriched hit	6.27041	FALSE	TRUE	TRUE
422	FAA1	P30624	Long-chain-fatty-acid--CoA ligase 1 OS=Saccharomyces cerevisiae (strain ATCC 204508 / S288c) GN=FAA1 PE=1 SV=1	3	1	1	1	6	3	6	6.43821	3.46618	21.9359	12.2703	5.78302e-09	1.47864e-08	10.9891	0.933416	0.74182	0.74182	Total_CL - Total_NoCL	limma	5.78302e-09	1.47864e-08	TRUE	enriched hit	6.43821	FALSE	TRUE	TRUE
423	PSP2	P50109	Protein PSP2 OS=Saccharomyces cerevisiae (strain ATCC 204508 / S288c) GN=PSP2 PE=1 SV=2	3	1	1	1	6	3	10	6.30896	4.67495	22.1862	12.2605	5.84419e-09	1.49075e-08	10.9784	0.933469	0.74182	0.74182	Total_CL - Total_NoCL	limma	5.84419e-09	1.49075e-08	TRUE	enriched hit	6.30896	FALSE	TRUE	TRUE
424	LCB4	Q12246	Sphingoid long chain base kinase 4 OS=Saccharomyces cerevisiae (strain ATCC 204508 / S288c) GN=LCB4 PE=1 SV=1	3	1	1	1	6	3	3	5.69984	3.70817	21.1108	12.257	5.86556e-09	1.49268e-08	10.9747	0.933488	0.74182	0.74182	Total_CL - Total_NoCL	limma	5.86556e-09	1.49268e-08	TRUE	enriched hit	5.69984	FALSE	TRUE	TRUE
425	YCR087C	P37263	UPF0743 protein YCR087C-A OS=Saccharomyces cerevisiae (strain ATCC 204508 / S288c) GN=YCR087C-A PE=1 SV=1	2	1	1	NA	6	2	2	5.91602	2.62694	20.9264	12.2538	5.88614e-09	1.49439e-08	11.0094	0.933506	0.74182	0.74182	Total_CL - Total_NoCL	limma	5.88614e-09	1.49439e-08	TRUE	enriched hit	5.91602	FALSE	TRUE	TRUE
426	RPG1	P38249	Eukaryotic translation initiation factor 3 subunit A OS=Saccharomyces cerevisiae (strain ATCC 204508 / S288c) GN=RPG1 PE=1 SV=1	3	1	1	1	6	3	33	7.22208	4.31482	24.7489	12.2458	5.93642e-09	1.50306e-08	10.9625	0.933549	0.74182	0.74182	Total_CL - Total_NoCL	limma	5.93642e-09	1.50306e-08	TRUE	enriched hit	7.22208	FALSE	TRUE	TRUE
427	RIM1	P32445	Single-stranded DNA-binding protein RIM1, mitochondrial OS=Saccharomyces cerevisiae (strain ATCC 204508 / S288c) GN=RIM1 PE=1 SV=1	3	1	1	1	6	3	7	7.3144	4.57839	21.7176	12.244	5.94817e-09	1.50306e-08	11.0066	0.933559	0.74182	0.74182	Total_CL - Total_NoCL	limma	5.94817e-09	1.50306e-08	TRUE	enriched hit	7.3144	TRUE	TRUE	FALSE
428	HMG2	P12684	3-hydroxy-3-methylglutaryl-coenzyme A reductase 2 OS=Saccharomyces cerevisiae (strain ATCC 204508 / S288c) GN=HMG2 PE=1 SV=1	2	1	1	NA	6	2	3	5.91028	2.6271	20.2857	12.2405	5.97042e-09	1.50516e-08	10.9976	0.933578	0.74182	0.74182	Total_CL - Total_NoCL	limma	5.97042e-09	1.50516e-08	TRUE	enriched hit	5.91028	FALSE	TRUE	TRUE
429	SSC1	P0CS90	Heat shock protein SSC1, mitochondrial OS=Saccharomyces cerevisiae (strain ATCC 204508 / S288c) GN=SSC1 PE=1 SV=1	3	1	1	1	6	3	16	6.88872	3.29434	23.6471	12.2217	6.09124e-09	1.53204e-08	10.9363	0.933679	0.74182	0.74182	Total_CL - Total_NoCL	limma	6.09124e-09	1.53204e-08	TRUE	enriched hit	6.88872	FALSE	TRUE	TRUE
430	SXM1	Q04175	Importin beta SMX1 OS=Saccharomyces cerevisiae (strain ATCC 204508 / S288c) GN=SXM1 PE=1 SV=1	3	1	1	1	6	3	4	6.0024	2.67817	20.7195	12.2069	6.18865e-09	1.55292e-08	10.9241	0.933759	0.74182	0.74182	Total_CL - Total_NoCL	limma	6.18865e-09	1.55292e-08	TRUE	enriched hit	6.0024	FALSE	TRUE	TRUE
431	SEC27	P41811	Coatomer subunit beta' OS=Saccharomyces cerevisiae (strain ATCC 204508 / S288c) GN=SEC27 PE=1 SV=1	3	1	1	1	6	3	15	6.96563	2.77959	23.4123	12.1907	6.29691e-09	1.57642e-08	10.9025	0.933847	0.74182	0.74182	Total_CL - Total_NoCL	limma	6.29691e-09	1.57642e-08	TRUE	enriched hit	6.96563	FALSE	TRUE	TRUE
432	RVB1	Q03940	RuvB-like protein 1 OS=Saccharomyces cerevisiae (strain ATCC 204508 / S288c) GN=RVB1 PE=1 SV=1	3	1	1	1	6	3	5	5.88809	3.01194	21.0109	12.1854	6.33311e-09	1.58181e-08	10.8989	0.933876	0.74182	0.74182	Total_CL - Total_NoCL	limma	6.33311e-09	1.58181e-08	TRUE	enriched hit	5.88809	FALSE	TRUE	TRUE
433	PRS5	Q12265	Ribose-phosphate pyrophosphokinase 5 OS=Saccharomyces cerevisiae (strain ATCC 204508 / S288c) GN=PRS5 PE=1 SV=1	3	1	1	1	6	3	5	6.2214	2.59346	21.6149	12.1562	6.53467e-09	1.62838e-08	10.8648	0.934034	0.74182	0.74182	Total_CL - Total_NoCL	limma	6.53467e-09	1.62838e-08	TRUE	enriched hit	6.2214	FALSE	TRUE	TRUE
434	PRS3	P38689	Ribose-phosphate pyrophosphokinase 3 OS=Saccharomyces cerevisiae (strain ATCC 204508 / S288c) GN=PRS3 PE=1 SV=1	3	1	1	1	6	3	5	6.09649	3.61135	20.9632	12.149	6.58533e-09	1.63649e-08	10.857	0.934073	0.74182	0.74182	Total_CL - Total_NoCL	limma	6.58533e-09	1.63649e-08	TRUE	enriched hit	6.09649	TRUE	TRUE	FALSE
435	NGR1	P32831|P32831-2	Negative growth regulatory protein NGR1 OS=Saccharomyces cerevisiae (strain ATCC 204508 / S288c) GN=NGR1 PE=1 SV=2|Isoform 2 of Negative growth regulatory protein NGR1 OS=Saccharomyces cerevisiae (strain ATCC 204508 / S288c) GN=NGR1	3	1	1	1	6	3	5	6.31217	5.71613	20.6042	12.1473	6.59754e-09	1.63649e-08	10.8551	0.934082	0.74182	0.74182	Total_CL - Total_NoCL	limma	6.59754e-09	1.63649e-08	TRUE	enriched hit	6.31217	FALSE	TRUE	TRUE
436	RPS8A|RPS8B	P0CX39|P0CX40	40S ribosomal protein S8-A OS=Saccharomyces cerevisiae (strain ATCC 204508 / S288c) GN=RPS8A PE=1 SV=1|40S ribosomal protein S8-B OS=Saccharomyces cerevisiae (strain ATCC 204508 / S288c) GN=RPS8B PE=1 SV=1	3	1	1	1	6	3	12	8.4497	6.01479	23.9354	12.1418	6.63672e-09	1.64244e-08	10.8491	0.934112	0.74182	0.74182	Total_CL - Total_NoCL	limma	6.63672e-09	1.64244e-08	TRUE	enriched hit	8.4497	FALSE	TRUE	TRUE
437	HXK2	P04807	Hexokinase-2 OS=Saccharomyces cerevisiae (strain ATCC 204508 / S288c) GN=HXK2 PE=1 SV=4	3	1	1	1	6	3	12	6.87881	3.58133	23.7908	12.095	6.97989e-09	1.72341e-08	10.7977	0.934365	0.74182	0.74182	Total_CL - Total_NoCL	limma	6.97989e-09	1.72341e-08	TRUE	enriched hit	6.87881	TRUE	TRUE	FALSE
438	RTS1	P38903	Serine/threonine-protein phosphatase 2A 56 kDa regulatory subunit delta isoform OS=Saccharomyces cerevisiae (strain ATCC 204508 / S288c) GN=RTS1 PE=1 SV=2	3	1	1	1	6	3	9	6.10166	3.16144	21.7162	12.0766	7.1199e-09	1.75397e-08	10.7775	0.934465	0.74182	0.74182	Total_CL - Total_NoCL	limma	7.1199e-09	1.75397e-08	TRUE	enriched hit	6.10166	FALSE	TRUE	TRUE
439	RBG2	P53295	Ribosome-interacting GTPase 2 OS=Saccharomyces cerevisiae (strain ATCC 204508 / S288c) GN=RBG2 PE=1 SV=1	3	1	1	1	6	3	3	6.14812	3.51373	20.2174	12.065	7.2096e-09	1.77202e-08	10.7734	0.934527	0.74182	0.74182	Total_CL - Total_NoCL	limma	7.2096e-09	1.77202e-08	TRUE	enriched hit	6.14812	FALSE	TRUE	TRUE
440	VIP1	Q06685	Inositol hexakisphosphate and diphosphoinositol-pentakisphosphate kinase OS=Saccharomyces cerevisiae (strain ATCC 204508 / S288c) GN=VIP1 PE=1 SV=1	3	1	1	1	6	3	10	6.06986	3.32574	21.7294	12.0556	7.284e-09	1.78624e-08	10.7543	0.934579	0.74182	0.74182	Total_CL - Total_NoCL	limma	7.284e-09	1.78624e-08	TRUE	enriched hit	6.06986	FALSE	TRUE	TRUE
441	CPR5	P35176	Peptidyl-prolyl cis-trans isomerase D OS=Saccharomyces cerevisiae (strain ATCC 204508 / S288c) GN=CPR5 PE=2 SV=1	2	1	NA	1	6	2	2	5.90332	2.67925	20.6643	12.0485	7.33952e-09	1.79577e-08	10.7904	0.934617	0.74182	0.74182	Total_CL - Total_NoCL	limma	7.33952e-09	1.79577e-08	TRUE	enriched hit	5.90332	FALSE	TRUE	TRUE
442	RPS17A|RPS17B	P02407|P14127	40S ribosomal protein S17-A OS=Saccharomyces cerevisiae (strain ATCC 204508 / S288c) GN=RPS17A PE=1 SV=1|40S ribosomal protein S17-B OS=Saccharomyces cerevisiae (strain ATCC 204508 / S288c) GN=RPS17B PE=1 SV=1	3	1	1	1	6	3	9	7.94772	7.56004	22.3841	12.0362	7.43853e-09	1.81588e-08	10.733	0.934684	0.74182	0.74182	Total_CL - Total_NoCL	limma	7.43853e-09	1.81588e-08	TRUE	enriched hit	7.94772	FALSE	TRUE	TRUE
443	FSH1	P38777	Family of serine hydrolases 1 OS=Saccharomyces cerevisiae (strain ATCC 204508 / S288c) GN=FSH1 PE=1 SV=1	2	1	1	NA	6	2	3	5.69517	3.0489	20.3605	11.9954	7.77553e-09	1.89386e-08	10.7333	0.934905	0.74182	0.74182	Total_CL - Total_NoCL	limma	7.77553e-09	1.89386e-08	TRUE	enriched hit	5.69517	TRUE	TRUE	FALSE
444	HEL2	Q05580	E3 ubiquitin-protein ligase HEL2 OS=Saccharomyces cerevisiae (strain ATCC 204508 / S288c) GN=HEL2 PE=1 SV=1	3	1	1	1	6	3	4	5.59825	4.23224	19.3443	11.9854	7.86043e-09	1.90672e-08	10.7324	0.934959	0.74182	0.74182	Total_CL - Total_NoCL	limma	7.86043e-09	1.90672e-08	TRUE	enriched hit	5.59825	FALSE	TRUE	TRUE
445	MKT1	P40850	Protein MKT1 OS=Saccharomyces cerevisiae (strain ATCC 204508 / S288c) GN=MKT1 PE=1 SV=2	3	1	1	1	6	3	6	6.21126	2.56567	22.1695	11.985	7.86366e-09	1.90672e-08	10.6764	0.934961	0.74182	0.74182	Total_CL - Total_NoCL	limma	7.86366e-09	1.90672e-08	TRUE	enriched hit	6.21126	FALSE	TRUE	TRUE
446	NIP7	Q08962	60S ribosome subunit biogenesis protein NIP7 OS=Saccharomyces cerevisiae (strain ATCC 204508 / S288c) GN=NIP7 PE=1 SV=1	3	1	1	1	6	3	3	6.1381	5.13172	20.3351	11.9642	8.0437e-09	1.946e-08	10.7047	0.935073	0.74182	0.74182	Total_CL - Total_NoCL	limma	8.0437e-09	1.946e-08	TRUE	enriched hit	6.1381	TRUE	TRUE	FALSE
447	YBT1	P32386	ATP-dependent bile acid permease OS=Saccharomyces cerevisiae (strain ATCC 204508 / S288c) GN=YBT1 PE=1 SV=2	3	1	1	1	6	3	32	6.89876	2.30541	24.2466	11.9468	8.19716e-09	1.97869e-08	10.6341	0.935167	0.74182	0.74182	Total_CL - Total_NoCL	limma	8.19716e-09	1.97869e-08	TRUE	enriched hit	6.89876	FALSE	TRUE	TRUE
448	SAC1	P32368	Phosphoinositide phosphatase SAC1 OS=Saccharomyces cerevisiae (strain ATCC 204508 / S288c) GN=SAC1 PE=1 SV=1	3	1	1	1	6	3	4	6.06548	3.00537	20.8154	11.9237	8.40658e-09	2.02471e-08	10.6126	0.935293	0.74182	0.74182	Total_CL - Total_NoCL	limma	8.40658e-09	2.02471e-08	TRUE	enriched hit	6.06548	FALSE	TRUE	TRUE
449	NOP56	Q12460	Nucleolar protein 56 OS=Saccharomyces cerevisiae (strain ATCC 204508 / S288c) GN=NOP56 PE=1 SV=1	3	1	1	1	6	3	12	6.71476	3.66036	23.2907	11.8777	8.84041e-09	2.12445e-08	10.5571	0.935542	0.74182	0.74182	Total_CL - Total_NoCL	limma	8.84041e-09	2.12445e-08	TRUE	enriched hit	6.71476	TRUE	TRUE	FALSE
450	KEX1	P09620	Pheromone-processing carboxypeptidase KEX1 OS=Saccharomyces cerevisiae (strain ATCC 204508 / S288c) GN=KEX1 PE=1 SV=1	3	1	1	1	6	3	8	6.2329	1.82989	23.4904	11.8729	8.88738e-09	2.131e-08	10.5517	0.935568	0.74182	0.74182	Total_CL - Total_NoCL	limma	8.88738e-09	2.131e-08	TRUE	enriched hit	6.2329	FALSE	TRUE	TRUE
451	YPL245W	Q12179	Uncharacterized protein YPL245W OS=Saccharomyces cerevisiae (strain ATCC 204508 / S288c) GN=YPL245W PE=1 SV=1	3	1	1	1	6	3	5	5.82823	4.60803	20.0022	11.8614	9.00035e-09	2.15042e-08	10.5723	0.93563	0.74182	0.74182	Total_CL - Total_NoCL	limma	9.00035e-09	2.15042e-08	TRUE	enriched hit	5.82823	FALSE	TRUE	TRUE
452	RPL24B	P24000	60S ribosomal protein L24-B OS=Saccharomyces cerevisiae (strain ATCC 204508 / S288c) GN=RPL24B PE=1 SV=1	2	1	1	NA	6	2	2	6.94593	6.07421	20.8912	11.8606	9.00825e-09	2.15042e-08	10.5815	0.935634	0.74182	0.74182	Total_CL - Total_NoCL	limma	9.00825e-09	2.15042e-08	TRUE	enriched hit	6.94593	FALSE	TRUE	TRUE
453	MES1	P00958	Methionine--tRNA ligase, cytoplasmic OS=Saccharomyces cerevisiae (strain ATCC 204508 / S288c) GN=MES1 PE=1 SV=4	3	1	1	1	6	3	17	6.81703	4.35197	23.7065	11.8375	9.2391e-09	2.20066e-08	10.5121	0.935759	0.74182	0.74182	Total_CL - Total_NoCL	limma	9.2391e-09	2.20066e-08	TRUE	enriched hit	6.81703	TRUE	TRUE	FALSE
454	OYE2	Q03558	NADPH dehydrogenase 2 OS=Saccharomyces cerevisiae (strain ATCC 204508 / S288c) GN=OYE2 PE=1 SV=3	3	1	1	1	6	3	10	6.49762	3.42319	22.2261	11.826	9.35681e-09	2.22379e-08	10.4992	0.935822	0.74182	0.74182	Total_CL - Total_NoCL	limma	9.35681e-09	2.22379e-08	TRUE	enriched hit	6.49762	FALSE	TRUE	TRUE
455	ERG4	P25340	Delta(24(24(1)))-sterol reductase OS=Saccharomyces cerevisiae (strain ATCC 204508 / S288c) GN=ERG4 PE=1 SV=2	3	1	1	1	6	3	3	6.43634	2.47116	21.3624	11.7747	9.90118e-09	2.34799e-08	10.4474	0.9361	0.74182	0.74182	Total_CL - Total_NoCL	limma	9.90118e-09	2.34799e-08	TRUE	enriched hit	6.43634	TRUE	TRUE	FALSE
456	RTN1	Q04947	Reticulon-like protein 1 OS=Saccharomyces cerevisiae (strain ATCC 204508 / S288c) GN=RTN1 PE=1 SV=1	3	1	1	1	6	3	6	7.06445	3.77731	22.2027	11.7702	9.95066e-09	2.34971e-08	10.4365	0.936124	0.74182	0.74182	Total_CL - Total_NoCL	limma	9.95066e-09	2.34971e-08	TRUE	enriched hit	7.06445	FALSE	TRUE	TRUE
457	HHO1	P53551	Histone H1 OS=Saccharomyces cerevisiae (strain ATCC 204508 / S288c) GN=HHO1 PE=1 SV=1	2	1	1	NA	6	2	2	5.99164	2.60783	20.8842	11.7683	9.97091e-09	2.34971e-08	10.4793	0.936134	0.74182	0.74182	Total_CL - Total_NoCL	limma	9.97091e-09	2.34971e-08	TRUE	enriched hit	5.99164	FALSE	TRUE	TRUE
458	FAT1	P38225	Very long-chain fatty acid transport protein OS=Saccharomyces cerevisiae (strain ATCC 204508 / S288c) GN=FAT1 PE=1 SV=2	2	1	1	NA	6	2	4	5.74838	3.42225	20.096	11.7681	9.97376e-09	2.34971e-08	10.479	0.936135	0.74182	0.74182	Total_CL - Total_NoCL	limma	9.97376e-09	2.34971e-08	TRUE	enriched hit	5.74838	FALSE	TRUE	TRUE
459	ELO2	P25358	Elongation of fatty acids protein 2 OS=Saccharomyces cerevisiae (strain ATCC 204508 / S288c) GN=ELO2 PE=1 SV=1	3	1	1	1	6	3	3	6.57638	2.34968	21.4211	11.7218	1.04975e-08	2.46771e-08	10.3937	0.936386	0.74182	0.74182	Total_CL - Total_NoCL	limma	1.04975e-08	2.46771e-08	TRUE	enriched hit	6.57638	TRUE	TRUE	FALSE
460	SHM2	P37291	Serine hydroxymethyltransferase, cytosolic OS=Saccharomyces cerevisiae (strain ATCC 204508 / S288c) GN=SHM2 PE=1 SV=2	3	1	1	1	6	3	8	6.41274	3.61743	22.6208	11.71	1.06361e-08	2.49137e-08	10.3686	0.93645	0.74182	0.74182	Total_CL - Total_NoCL	limma	1.06361e-08	2.49137e-08	TRUE	enriched hit	6.41274	FALSE	TRUE	TRUE
461	RPN6	Q12377	26S proteasome regulatory subunit RPN6 OS=Saccharomyces cerevisiae (strain ATCC 204508 / S288c) GN=RPN6 PE=1 SV=3	2	1	1	NA	6	2	4	5.53233	2.83648	20.3745	11.7093	1.06443e-08	2.49137e-08	10.4134	0.936454	0.74182	0.74182	Total_CL - Total_NoCL	limma	1.06443e-08	2.49137e-08	TRUE	enriched hit	5.53233	FALSE	TRUE	TRUE
462	NOP6	Q07623	Nucleolar protein 6 OS=Saccharomyces cerevisiae (strain ATCC 204508 / S288c) GN=NOP6 PE=1 SV=1	2	1	1	NA	6	2	3	6.01345	3.6063	19.62	11.6659	1.11692e-08	2.60624e-08	10.3685	0.936689	0.74182	0.74182	Total_CL - Total_NoCL	limma	1.11692e-08	2.60624e-08	TRUE	enriched hit	6.01345	FALSE	TRUE	TRUE
463	YPR1	Q12458	Putative reductase 1 OS=Saccharomyces cerevisiae (strain ATCC 204508 / S288c) GN=YPR1 PE=1 SV=1	2	1	NA	1	6	2	2	5.95625	3.40128	20.6062	11.6648	1.11834e-08	2.60624e-08	10.3636	0.936695	0.74182	0.74182	Total_CL - Total_NoCL	limma	1.11834e-08	2.60624e-08	TRUE	enriched hit	5.95625	FALSE	TRUE	TRUE
464	DAK1	P54838	Dihydroxyacetone kinase 1 OS=Saccharomyces cerevisiae (strain ATCC 204508 / S288c) GN=DAK1 PE=1 SV=1	3	1	1	1	6	3	9	6.33213	3.19527	22.4643	11.6613	1.12275e-08	2.61088e-08	10.3134	0.936714	0.74182	0.74182	Total_CL - Total_NoCL	limma	1.12275e-08	2.61088e-08	TRUE	enriched hit	6.33213	TRUE	TRUE	FALSE
465	PGM1	P33401	Phosphoglucomutase 1 OS=Saccharomyces cerevisiae (strain ATCC 204508 / S288c) GN=PGM1 PE=1 SV=1	3	1	1	1	6	3	7	6.00847	3.55629	21.0642	11.6515	1.13506e-08	2.63383e-08	10.3022	0.936767	0.74182	0.74182	Total_CL - Total_NoCL	limma	1.13506e-08	2.63383e-08	TRUE	enriched hit	6.00847	FALSE	TRUE	TRUE
466	PHO84	P25297	Inorganic phosphate transporter PHO84 OS=Saccharomyces cerevisiae (strain ATCC 204508 / S288c) GN=PHO84 PE=1 SV=2	3	1	1	1	5	3	4	6.36269	2.49965	21.0608	11.6432	1.14561e-08	2.65259e-08	10.3058	0.936812	0.74182	0.74182	Total_CL - Total_NoCL	limma	1.14561e-08	2.65259e-08	TRUE	enriched hit	6.36269	FALSE	TRUE	TRUE
467	HOM3	P10869	Aspartokinase OS=Saccharomyces cerevisiae (strain ATCC 204508 / S288c) GN=HOM3 PE=1 SV=2	3	1	1	1	6	3	4	6.07912	3.0439	20.9773	11.634	1.1573e-08	2.67394e-08	10.3106	0.936861	0.74182	0.74182	Total_CL - Total_NoCL	limma	1.1573e-08	2.67394e-08	TRUE	enriched hit	6.07912	FALSE	TRUE	TRUE
468	KRE6	P32486	Beta-glucan synthesis-associated protein KRE6 OS=Saccharomyces cerevisiae (strain ATCC 204508 / S288c) GN=KRE6 PE=1 SV=2	3	1	1	1	6	3	6	6.85721	2.37501	23.1842	11.6231	1.1715e-08	2.69942e-08	10.27	0.93692	0.74182	0.74182	Total_CL - Total_NoCL	limma	1.1715e-08	2.69942e-08	TRUE	enriched hit	6.85721	FALSE	TRUE	TRUE
469	ASI1	P54074	Protein ASI1 OS=Saccharomyces cerevisiae (strain ATCC 204508 / S288c) GN=ASI1 PE=1 SV=1	2	1	1	NA	6	2	3	5.95592	2.8064	21.2659	11.6217	1.17334e-08	2.69942e-08	10.3152	0.936928	0.74182	0.74182	Total_CL - Total_NoCL	limma	1.17334e-08	2.69942e-08	TRUE	enriched hit	5.95592	FALSE	TRUE	TRUE
470	VMA13	P41807	V-type proton ATPase subunit H OS=Saccharomyces cerevisiae (strain ATCC 204508 / S288c) GN=VMA13 PE=1 SV=1	3	1	1	1	6	3	5	5.81598	3.59116	20.3632	11.6163	1.18041e-08	2.70993e-08	10.2648	0.936957	0.74182	0.74182	Total_CL - Total_NoCL	limma	1.18041e-08	2.70993e-08	TRUE	enriched hit	5.81598	FALSE	TRUE	TRUE
471	CHC1	P22137	Clathrin heavy chain OS=Saccharomyces cerevisiae (strain ATCC 204508 / S288c) GN=CHC1 PE=1 SV=1	3	1	1	1	6	3	31	6.75347	2.44146	24.3146	11.5941	1.21009e-08	2.77216e-08	10.2369	0.937078	0.74182	0.74182	Total_CL - Total_NoCL	limma	1.21009e-08	2.77216e-08	TRUE	enriched hit	6.75347	FALSE	TRUE	TRUE
472	MOD5	P07884|P07884-2	tRNA dimethylallyltransferase, mitochondrial OS=Saccharomyces cerevisiae (strain ATCC 204508 / S288c) GN=MOD5 PE=1 SV=2|Isoform II of tRNA dimethylallyltransferase, mitochondrial OS=Saccharomyces cerevisiae (strain ATCC 204508 / S288c) GN=MOD5	2	1	1	NA	6	2	4	5.76497	4.23228	20.0055	11.5845	1.22316e-08	2.7951e-08	10.2732	0.93713	0.74182	0.74182	Total_CL - Total_NoCL	limma	1.22316e-08	2.7951e-08	TRUE	enriched hit	5.76497	TRUE	TRUE	FALSE
473	HRI1	Q05905	Protein HRI1 OS=Saccharomyces cerevisiae (strain ATCC 204508 / S288c) GN=HRI1 PE=1 SV=1	2	1	NA	1	6	2	2	5.78346	3.31657	20.7049	11.5829	1.22529e-08	2.7951e-08	10.2715	0.937138	0.74182	0.74182	Total_CL - Total_NoCL	limma	1.22529e-08	2.7951e-08	TRUE	enriched hit	5.78346	FALSE	TRUE	TRUE
474	RMD9	P53140	Protein RMD9, mitochondrial OS=Saccharomyces cerevisiae (strain ATCC 204508 / S288c) GN=RMD9 PE=1 SV=1	3	1	1	1	6	3	4	5.75204	5.91088	20.0033	11.5495	1.27205e-08	2.89565e-08	10.2524	0.937319	0.74182	0.74182	Total_CL - Total_NoCL	limma	1.27205e-08	2.89565e-08	TRUE	enriched hit	5.75204	FALSE	TRUE	TRUE
475	TYW1	Q08960	S-adenosyl-L-methionine-dependent tRNA 4-demethylwyosine synthase OS=Saccharomyces cerevisiae (strain ATCC 204508 / S288c) GN=TYW1 PE=1 SV=1	3	1	1	1	6	3	5	6.19876	2.51342	21.2632	11.5252	1.30715e-08	2.96929e-08	10.1582	0.937451	0.74182	0.74182	Total_CL - Total_NoCL	limma	1.30715e-08	2.96929e-08	TRUE	enriched hit	6.19876	FALSE	TRUE	TRUE
476	ALE1	Q08548	Lysophospholipid acyltransferase OS=Saccharomyces cerevisiae (strain ATCC 204508 / S288c) GN=ALE1 PE=1 SV=1	3	1	1	1	6	3	5	6.47599	2.13424	21.6668	11.4891	1.3614e-08	3.08474e-08	10.1167	0.937646	0.74182	0.74182	Total_CL - Total_NoCL	limma	1.3614e-08	3.08474e-08	TRUE	enriched hit	6.47599	FALSE	TRUE	TRUE
477	STT4	P37297	Phosphatidylinositol 4-kinase STT4 OS=Saccharomyces cerevisiae (strain ATCC 204508 / S288c) GN=STT4 PE=1 SV=1	3	1	1	1	6	3	5	5.74045	3.30341	20.5899	11.4876	1.36369e-08	3.08474e-08	10.1149	0.937654	0.74182	0.74182	Total_CL - Total_NoCL	limma	1.36369e-08	3.08474e-08	TRUE	enriched hit	5.74045	FALSE	TRUE	TRUE
478	YPS1	P32329	Aspartic proteinase 3 OS=Saccharomyces cerevisiae (strain ATCC 204508 / S288c) GN=YPS1 PE=1 SV=2	3	1	1	1	6	3	3	6.98122	2.62002	22.5825	11.4808	1.37421e-08	3.10204e-08	10.1096	0.937691	0.74182	0.74182	Total_CL - Total_NoCL	limma	1.37421e-08	3.10204e-08	TRUE	enriched hit	6.98122	TRUE	TRUE	FALSE
479	SAH1	P39954	Adenosylhomocysteinase OS=Saccharomyces cerevisiae (strain ATCC 204508 / S288c) GN=SAH1 PE=1 SV=1	3	1	1	1	6	3	19	7.39929	2.54822	24.5046	11.451	1.42113e-08	3.19472e-08	10.0728	0.937853	0.74182	0.74182	Total_CL - Total_NoCL	limma	1.42113e-08	3.19472e-08	TRUE	enriched hit	7.39929	FALSE	TRUE	TRUE
480	SPF1	P39986	Manganese-transporting ATPase 1 OS=Saccharomyces cerevisiae (strain ATCC 204508 / S288c) GN=SPF1 PE=1 SV=1	3	1	1	1	6	3	23	7.12829	2.30383	24.1825	11.451	1.42119e-08	3.19472e-08	10.0728	0.937853	0.74182	0.74182	Total_CL - Total_NoCL	limma	1.42119e-08	3.19472e-08	TRUE	enriched hit	7.12829	FALSE	TRUE	TRUE
481	RIX7	Q07844	Ribosome biogenesis ATPase RIX7 OS=Saccharomyces cerevisiae (strain ATCC 204508 / S288c) GN=RIX7 PE=1 SV=1	3	1	1	1	6	3	4	5.72635	2.9823	20.8639	11.4369	1.44395e-08	3.23913e-08	10.0565	0.937929	0.74182	0.74182	Total_CL - Total_NoCL	limma	1.44395e-08	3.23913e-08	TRUE	enriched hit	5.72635	FALSE	TRUE	TRUE
482	RPT6	Q01939	26S protease regulatory subunit 8 homolog OS=Saccharomyces cerevisiae (strain ATCC 204508 / S288c) GN=RPT6 PE=1 SV=4	3	1	1	1	6	3	3	5.87154	3.7888	20.4	11.435	1.447e-08	3.23925e-08	10.0544	0.937939	0.74182	0.74182	Total_CL - Total_NoCL	limma	1.447e-08	3.23925e-08	TRUE	enriched hit	5.87154	FALSE	TRUE	TRUE
483	PUP2	P32379	Proteasome subunit alpha type-5 OS=Saccharomyces cerevisiae (strain ATCC 204508 / S288c) GN=PUP2 PE=1 SV=2	3	1	1	1	6	3	4	5.99753	3.0446	21.7721	11.429	1.45697e-08	3.25481e-08	10.0474	0.937972	0.74182	0.74182	Total_CL - Total_NoCL	limma	1.45697e-08	3.25481e-08	TRUE	enriched hit	5.99753	FALSE	TRUE	TRUE
484	SRP68	P38687	Signal recognition particle subunit SRP68 OS=Saccharomyces cerevisiae (strain ATCC 204508 / S288c) GN=SRP68 PE=1 SV=1	3	1	1	1	6	3	10	6.42612	4.67247	22.0008	11.4192	1.47313e-08	3.2841e-08	10.0361	0.938025	0.74182	0.74182	Total_CL - Total_NoCL	limma	1.47313e-08	3.2841e-08	TRUE	enriched hit	6.42612	FALSE	TRUE	TRUE
485	RPO21	P04050	DNA-directed RNA polymerase II subunit RPB1 OS=Saccharomyces cerevisiae (strain ATCC 204508 / S288c) GN=RPO21 PE=1 SV=2	3	1	1	1	6	3	22	6.57294	2.65788	24.0534	11.4164	1.47779e-08	3.2877e-08	10.0329	0.93804	0.74182	0.74182	Total_CL - Total_NoCL	limma	1.47779e-08	3.2877e-08	TRUE	enriched hit	6.57294	FALSE	TRUE	TRUE
486	NTE1	Q04958	Lysophospholipase NTE1 OS=Saccharomyces cerevisiae (strain ATCC 204508 / S288c) GN=NTE1 PE=1 SV=1	2	1	1	NA	6	2	7	6.0387	2.92676	21.0486	11.3991	1.50712e-08	3.34079e-08	10.0625	0.938134	0.74182	0.74182	Total_CL - Total_NoCL	limma	1.50712e-08	3.34079e-08	TRUE	enriched hit	6.0387	FALSE	TRUE	TRUE
487	SGN1	P40561	RNA-binding protein SGN1 OS=Saccharomyces cerevisiae (strain ATCC 204508 / S288c) GN=SGN1 PE=1 SV=1	3	1	1	1	6	3	4	5.96802	4.63522	20.4193	11.3976	1.50958e-08	3.34079e-08	10.041	0.938142	0.74182	0.74182	Total_CL - Total_NoCL	limma	1.50958e-08	3.34079e-08	TRUE	enriched hit	5.96802	FALSE	TRUE	TRUE
488	VOA1	P53262	V0 assembly protein 1 OS=Saccharomyces cerevisiae (strain ATCC 204508 / S288c) GN=VOA1 PE=1 SV=1	2	1	NA	1	6	2	2	5.8735	3.21389	20.2124	11.3969	1.51094e-08	3.34079e-08	10.0599	0.938146	0.74182	0.74182	Total_CL - Total_NoCL	limma	1.51094e-08	3.34079e-08	TRUE	enriched hit	5.8735	FALSE	TRUE	TRUE
489	COP1	P53622	Coatomer subunit alpha OS=Saccharomyces cerevisiae (strain ATCC 204508 / S288c) GN=COP1 PE=1 SV=2	3	1	1	1	6	3	12	6.64198	3.03343	23.0146	11.3919	1.51937e-08	3.35255e-08	10.0045	0.938172	0.74182	0.74182	Total_CL - Total_NoCL	limma	1.51937e-08	3.35255e-08	TRUE	enriched hit	6.64198	FALSE	TRUE	TRUE
490	COF1	Q03048	Cofilin OS=Saccharomyces cerevisiae (strain ATCC 204508 / S288c) GN=COF1 PE=1 SV=1	2	1	1	NA	6	2	4	5.90148	3.08966	19.7733	11.3869	1.5281e-08	3.36494e-08	10.0485	0.9382	0.74182	0.74182	Total_CL - Total_NoCL	limma	1.5281e-08	3.36494e-08	TRUE	enriched hit	5.90148	FALSE	TRUE	TRUE
491	TRM82	Q03774	tRNA (guanine-N(7)-)-methyltransferase non-catalytic subunit TRM82 OS=Saccharomyces cerevisiae (strain ATCC 204508 / S288c) GN=TRM82 PE=1 SV=1	2	1	1	NA	6	2	3	5.54822	3.12465	19.6571	11.3663	1.56423e-08	3.4361e-08	10.0563	0.938311	0.74182	0.74182	Total_CL - Total_NoCL	limma	1.56423e-08	3.4361e-08	TRUE	enriched hit	5.54822	TRUE	TRUE	FALSE
492	PUS4	P48567	tRNA pseudouridine synthase 4 OS=Saccharomyces cerevisiae (strain ATCC 204508 / S288c) GN=PUS4 PE=1 SV=1	3	1	1	1	6	3	9	6.20919	5.54891	21.7549	11.3649	1.56678e-08	3.4361e-08	10.0354	0.938319	0.74182	0.74182	Total_CL - Total_NoCL	limma	1.56678e-08	3.4361e-08	TRUE	enriched hit	6.20919	TRUE	TRUE	FALSE
493	ZWF1	P11412	Glucose-6-phosphate 1-dehydrogenase OS=Saccharomyces cerevisiae (strain ATCC 204508 / S288c) GN=ZWF1 PE=1 SV=4	2	1	NA	1	6	2	3	5.72759	3.46773	20.765	11.348	1.5972e-08	3.4957e-08	10.0038	0.938411	0.74182	0.74182	Total_CL - Total_NoCL	limma	1.5972e-08	3.4957e-08	TRUE	enriched hit	5.72759	TRUE	TRUE	FALSE
494	SEC13	Q04491	Protein transport protein SEC13 OS=Saccharomyces cerevisiae (strain ATCC 204508 / S288c) GN=SEC13 PE=1 SV=1	3	1	1	1	6	3	4	7.03242	2.68232	22.2146	11.3439	1.60469e-08	3.50247e-08	9.9487	0.938433	0.74182	0.74182	Total_CL - Total_NoCL	limma	1.60469e-08	3.50247e-08	TRUE	enriched hit	7.03242	FALSE	TRUE	TRUE
495	ILV2	P07342	Acetolactate synthase catalytic subunit, mitochondrial OS=Saccharomyces cerevisiae (strain ATCC 204508 / S288c) GN=ILV2 PE=1 SV=1	3	1	1	1	6	3	9	6.28972	2.63428	22.3061	11.3423	1.60749e-08	3.50247e-08	9.94691	0.938441	0.74182	0.74182	Total_CL - Total_NoCL	limma	1.60749e-08	3.50247e-08	TRUE	enriched hit	6.28972	FALSE	TRUE	TRUE
496	BEM2	P39960	GTPase-activating protein BEM2/IPL2 OS=Saccharomyces cerevisiae (strain ATCC 204508 / S288c) GN=BEM2 PE=1 SV=1	3	1	1	1	6	3	17	6.1739	3.15777	22.3505	11.3409	1.61003e-08	3.50247e-08	9.9453	0.938449	0.74182	0.74182	Total_CL - Total_NoCL	limma	1.61003e-08	3.50247e-08	TRUE	enriched hit	6.1739	FALSE	TRUE	TRUE
497	NTH1	P32356	Neutral trehalase OS=Saccharomyces cerevisiae (strain ATCC 204508 / S288c) GN=NTH1 PE=1 SV=3	2	1	1	NA	6	2	4	5.53523	3.11855	19.6523	11.3357	1.61966e-08	3.51633e-08	10.0147	0.938477	0.74182	0.74182	Total_CL - Total_NoCL	limma	1.61966e-08	3.51633e-08	TRUE	enriched hit	5.53523	FALSE	TRUE	TRUE
498	PRS1	P32895	Ribose-phosphate pyrophosphokinase 1 OS=Saccharomyces cerevisiae (strain ATCC 204508 / S288c) GN=PRS1 PE=1 SV=1	2	1	1	NA	6	2	4	5.85686	3.41294	20.1703	11.3269	1.63604e-08	3.54476e-08	9.97953	0.938525	0.74182	0.74182	Total_CL - Total_NoCL	limma	1.63604e-08	3.54476e-08	TRUE	enriched hit	5.85686	FALSE	TRUE	TRUE
499	YNL247W	P53852	Cysteine--tRNA ligase OS=Saccharomyces cerevisiae (strain ATCC 204508 / S288c) GN=YNL247W PE=1 SV=1	3	1	1	1	6	3	14	6.33314	4.06862	22.9166	11.2837	1.7187e-08	3.71638e-08	9.87855	0.938759	0.74182	0.74182	Total_CL - Total_NoCL	limma	1.7187e-08	3.71638e-08	TRUE	enriched hit	6.33314	TRUE	TRUE	FALSE
500	GAR1	P28007	H/ACA ribonucleoprotein complex subunit 1 OS=Saccharomyces cerevisiae (strain ATCC 204508 / S288c) GN=GAR1 PE=1 SV=1	3	1	1	1	6	3	2	6.41077	5.16069	20.9773	11.2784	1.72906e-08	3.72437e-08	9.87241	0.938787	0.74182	0.74182	Total_CL - Total_NoCL	limma	1.72906e-08	3.72437e-08	TRUE	enriched hit	6.41077	FALSE	TRUE	TRUE
501	POP4	P38336	RNases MRP/P 32.9 kDa subunit OS=Saccharomyces cerevisiae (strain ATCC 204508 / S288c) GN=POP4 PE=1 SV=1	2	1	NA	1	6	2	2	5.56146	4.54683	19.5442	11.2783	1.7293e-08	3.72437e-08	9.95162	0.938788	0.74182	0.74182	Total_CL - Total_NoCL	limma	1.7293e-08	3.72437e-08	TRUE	enriched hit	5.56146	TRUE	TRUE	FALSE
502	SHP1	P34223	UBX domain-containing protein 1 OS=Saccharomyces cerevisiae (strain ATCC 204508 / S288c) GN=SHP1 PE=1 SV=1	3	1	1	1	6	3	2	5.83163	4.21051	20.5397	11.2579	1.77004e-08	3.80453e-08	9.91266	0.938898	0.74182	0.74182	Total_CL - Total_NoCL	limma	1.77004e-08	3.80453e-08	TRUE	enriched hit	5.83163	FALSE	TRUE	TRUE
503	TCB2	P48231	Tricalbin-2 OS=Saccharomyces cerevisiae (strain ATCC 204508 / S288c) GN=TCB2 PE=1 SV=1	3	1	1	1	6	3	6	6.06772	3.53291	21.2501	11.2552	1.77566e-08	3.80901e-08	9.84522	0.938913	0.74182	0.74182	Total_CL - Total_NoCL	limma	1.77566e-08	3.80901e-08	TRUE	enriched hit	6.06772	FALSE	TRUE	TRUE
504	RTT10	Q08924	Regulator of Ty1 transposition protein 10 OS=Saccharomyces cerevisiae (strain ATCC 204508 / S288c) GN=RTT10 PE=1 SV=1	3	1	1	1	6	3	12	6.33805	2.90505	22.785	11.2528	1.7804e-08	3.8116e-08	9.84249	0.938926	0.74182	0.74182	Total_CL - Total_NoCL	limma	1.7804e-08	3.8116e-08	TRUE	enriched hit	6.33805	FALSE	TRUE	TRUE
505	YKT6	P36015	Synaptobrevin homolog YKT6 OS=Saccharomyces cerevisiae (strain ATCC 204508 / S288c) GN=YKT6 PE=1 SV=1	2	1	1	NA	6	2	2	6.25877	3.25942	20.4481	11.2473	1.7917e-08	3.8282e-08	9.89151	0.938956	0.74182	0.74182	Total_CL - Total_NoCL	limma	1.7917e-08	3.8282e-08	TRUE	enriched hit	6.25877	FALSE	TRUE	TRUE
506	TRM3	Q07527	tRNA (guanosine(18)-2'-O)-methyltransferase OS=Saccharomyces cerevisiae (strain ATCC 204508 / S288c) GN=TRM3 PE=1 SV=1	3	1	1	1	6	3	7	6.06828	3.47279	21.9771	11.2326	1.82224e-08	3.88576e-08	9.81875	0.939036	0.74182	0.74182	Total_CL - Total_NoCL	limma	1.82224e-08	3.88576e-08	TRUE	enriched hit	6.06828	FALSE	TRUE	TRUE
507	ABF2	Q02486	ARS-binding factor 2, mitochondrial OS=Saccharomyces cerevisiae (strain ATCC 204508 / S288c) GN=ABF2 PE=1 SV=1	3	1	1	1	6	3	6	6.19404	2.71128	21.7833	11.211	1.86795e-08	3.97537e-08	9.79341	0.939153	0.74182	0.74182	Total_CL - Total_NoCL	limma	1.86795e-08	3.97537e-08	TRUE	enriched hit	6.19404	TRUE	TRUE	FALSE
508	DED81	P38707	Asparagine--tRNA ligase, cytoplasmic OS=Saccharomyces cerevisiae (strain ATCC 204508 / S288c) GN=DED81 PE=1 SV=1	3	1	1	1	6	3	19	7.02836	3.87156	24.2135	11.1985	1.89506e-08	4.02514e-08	9.77868	0.93922	0.74182	0.74182	Total_CL - Total_NoCL	limma	1.89506e-08	4.02514e-08	TRUE	enriched hit	7.02836	TRUE	TRUE	FALSE
509	CPT1	P17898	Cholinephosphotransferase 1 OS=Saccharomyces cerevisiae (strain ATCC 204508 / S288c) GN=CPT1 PE=1 SV=3	2	1	NA	1	6	2	3	6.47579	2.44789	21.6326	11.1708	1.95634e-08	4.14291e-08	9.79874	0.93937	0.74182	0.74182	Total_CL - Total_NoCL	limma	1.95634e-08	4.14291e-08	TRUE	enriched hit	6.47579	FALSE	TRUE	TRUE
510	SMC3	P47037	Structural maintenance of chromosomes protein 3 OS=Saccharomyces cerevisiae (strain ATCC 204508 / S288c) GN=SMC3 PE=1 SV=1	2	1	1	NA	6	2	5	5.65261	3.47759	20.7977	11.169	1.96045e-08	4.14291e-08	9.83416	0.93938	0.74182	0.74182	Total_CL - Total_NoCL	limma	1.96045e-08	4.14291e-08	TRUE	enriched hit	5.65261	FALSE	TRUE	TRUE
511	ZPR1	P53303	Zinc finger protein ZPR1 OS=Saccharomyces cerevisiae (strain ATCC 204508 / S288c) GN=ZPR1 PE=1 SV=1	3	1	1	1	6	3	7	6.29072	4.09559	22.2667	11.1683	1.96203e-08	4.14291e-08	9.74316	0.939384	0.74182	0.74182	Total_CL - Total_NoCL	limma	1.96203e-08	4.14291e-08	TRUE	enriched hit	6.29072	TRUE	TRUE	FALSE
512	NSG1	P38837	Protein NSG1 OS=Saccharomyces cerevisiae (strain ATCC 204508 / S288c) GN=NSG1 PE=1 SV=1	3	1	1	1	6	3	5	6.21647	3.35312	21.4662	11.1318	2.04644e-08	4.31271e-08	9.70008	0.939582	0.74182	0.74182	Total_CL - Total_NoCL	limma	2.04644e-08	4.31271e-08	TRUE	enriched hit	6.21647	FALSE	TRUE	TRUE
513	MVD1	P32377	Diphosphomevalonate decarboxylase OS=Saccharomyces cerevisiae (strain ATCC 204508 / S288c) GN=MVD1 PE=1 SV=2	3	1	1	1	6	3	6	6.11183	3.26628	20.757	11.1221	2.06942e-08	4.35263e-08	9.75525	0.939634	0.74182	0.74182	Total_CL - Total_NoCL	limma	2.06942e-08	4.35263e-08	TRUE	enriched hit	6.11183	FALSE	TRUE	TRUE
514	ELO3	P40319	Elongation of fatty acids protein 3 OS=Saccharomyces cerevisiae (strain ATCC 204508 / S288c) GN=ELO3 PE=1 SV=1	3	1	1	1	6	3	3	6.59993	2.96709	20.5348	11.1189	2.0773e-08	4.36071e-08	9.70809	0.939652	0.74182	0.74182	Total_CL - Total_NoCL	limma	2.0773e-08	4.36071e-08	TRUE	enriched hit	6.59993	TRUE	TRUE	FALSE
515	CDC60	P26637	Leucine--tRNA ligase, cytoplasmic OS=Saccharomyces cerevisiae (strain ATCC 204508 / S288c) GN=CDC60 PE=1 SV=1	3	1	1	1	6	3	23	6.97299	3.59194	24.5023	11.0993	2.12491e-08	4.452e-08	9.66158	0.939758	0.74182	0.74182	Total_CL - Total_NoCL	limma	2.12491e-08	4.452e-08	TRUE	enriched hit	6.97299	TRUE	TRUE	FALSE
516	LYS2	P07702	L-2-aminoadipate reductase OS=Saccharomyces cerevisiae (strain ATCC 204508 / S288c) GN=LYS2 PE=1 SV=2	3	1	1	1	6	3	9	6.16936	3.54659	22.1321	11.0683	2.20256e-08	4.60574e-08	9.62486	0.939925	0.74182	0.74182	Total_CL - Total_NoCL	limma	2.20256e-08	4.60574e-08	TRUE	enriched hit	6.16936	TRUE	TRUE	FALSE
517	YOL098C	Q12496	Uncharacterized protein YOL098C OS=Saccharomyces cerevisiae (strain ATCC 204508 / S288c) GN=YOL098C PE=1 SV=1	3	1	1	1	6	3	6	6.20684	3.13369	21.6607	11.0387	2.27984e-08	4.75812e-08	9.59236	0.940086	0.74182	0.74182	Total_CL - Total_NoCL	limma	2.27984e-08	4.75812e-08	TRUE	enriched hit	6.20684	FALSE	TRUE	TRUE
518	KGD1	P20967	2-oxoglutarate dehydrogenase, mitochondrial OS=Saccharomyces cerevisiae (strain ATCC 204508 / S288c) GN=KGD1 PE=1 SV=2	3	1	1	1	6	3	4	5.81182	2.56536	20.9337	11.0344	2.29111e-08	4.7724e-08	9.58732	0.940109	0.74182	0.74182	Total_CL - Total_NoCL	limma	2.29111e-08	4.7724e-08	TRUE	enriched hit	5.81182	FALSE	TRUE	TRUE
519	TPO5	P36029	Polyamine transporter TPO5 OS=Saccharomyces cerevisiae (strain ATCC 204508 / S288c) GN=TPO5 PE=1 SV=1	2	1	NA	1	6	2	3	6.0693	1.98893	21.5289	11.0257	2.31445e-08	4.81175e-08	9.6286	0.940156	0.74182	0.74182	Total_CL - Total_NoCL	limma	2.31445e-08	4.81175e-08	TRUE	enriched hit	6.0693	FALSE	TRUE	TRUE
520	RPS13	P05756	40S ribosomal protein S13 OS=Saccharomyces cerevisiae (strain ATCC 204508 / S288c) GN=RPS13 PE=1 SV=3	3	1	1	1	6	3	7	7.06675	5.1661	21.5046	11.0101	2.35707e-08	4.89091e-08	9.55548	0.940241	0.74182	0.74182	Total_CL - Total_NoCL	limma	2.35707e-08	4.89091e-08	TRUE	enriched hit	7.06675	TRUE	TRUE	FALSE
521	OSW5	P40219	Outer spore wall protein 5 OS=Saccharomyces cerevisiae (strain ATCC 204508 / S288c) GN=OSW5 PE=1 SV=1	2	1	1	NA	6	2	3	6.46369	3.00327	20.9369	11.0068	2.36593e-08	4.89714e-08	9.60632	0.940259	0.74182	0.74182	Total_CL - Total_NoCL	limma	2.36593e-08	4.89714e-08	TRUE	enriched hit	6.46369	FALSE	TRUE	TRUE
522	SIS1	P25294	Protein SIS1 OS=Saccharomyces cerevisiae (strain ATCC 204508 / S288c) GN=SIS1 PE=1 SV=1	2	1	1	NA	6	2	5	6.21345	3.42055	20.8873	11.0057	2.36914e-08	4.89714e-08	9.64897	0.940265	0.74182	0.74182	Total_CL - Total_NoCL	limma	2.36914e-08	4.89714e-08	TRUE	enriched hit	6.21345	FALSE	TRUE	TRUE
523	SLA1	P32790	Actin cytoskeleton-regulatory complex protein SLA1 OS=Saccharomyces cerevisiae (strain ATCC 204508 / S288c) GN=SLA1 PE=1 SV=1	3	1	1	1	6	3	5	5.82245	2.64127	21.0078	11.0018	2.37996e-08	4.90217e-08	9.54558	0.940286	0.74182	0.74182	Total_CL - Total_NoCL	limma	2.37996e-08	4.90217e-08	TRUE	enriched hit	5.82245	FALSE	TRUE	TRUE
524	RNR1	P21524	Ribonucleoside-diphosphate reductase large chain 1 OS=Saccharomyces cerevisiae (strain ATCC 204508 / S288c) GN=RNR1 PE=1 SV=2	3	1	1	1	6	3	10	6.5103	2.8165	22.8639	11.0015	2.38066e-08	4.90217e-08	9.54528	0.940287	0.74182	0.74182	Total_CL - Total_NoCL	limma	2.38066e-08	4.90217e-08	TRUE	enriched hit	6.5103	FALSE	TRUE	TRUE
525	LTV1	P34078	Protein LTV1 OS=Saccharomyces cerevisiae (strain ATCC 204508 / S288c) GN=LTV1 PE=1 SV=2	3	1	1	1	6	3	2	5.75768	3.5145	20.0419	10.9965	2.39455e-08	4.92136e-08	9.60812	0.940314	0.74182	0.74182	Total_CL - Total_NoCL	limma	2.39455e-08	4.92136e-08	TRUE	enriched hit	5.75768	FALSE	TRUE	TRUE
526	RPL30	P14120	60S ribosomal protein L30 OS=Saccharomyces cerevisiae (strain ATCC 204508 / S288c) GN=RPL30 PE=1 SV=3	3	1	1	1	6	3	5	7.22598	6.40291	21.8199	10.9751	2.45512e-08	5.03627e-08	9.51376	0.94043	0.74182	0.74182	Total_CL - Total_NoCL	limma	2.45512e-08	5.03627e-08	TRUE	enriched hit	7.22598	FALSE	TRUE	TRUE
527	DUR1	P32528	Urea amidolyase OS=Saccharomyces cerevisiae (strain ATCC 204508 / S288c) GN=DUR1,2 PE=1 SV=2	2	1	1	NA	6	2	5	5.66813	2.99219	20.0583	10.965	2.48443e-08	5.08673e-08	9.55682	0.940485	0.74182	0.74182	Total_CL - Total_NoCL	limma	2.48443e-08	5.08673e-08	TRUE	enriched hit	5.66813	FALSE	TRUE	TRUE
528	PUF6	Q04373	Pumilio homology domain family member 6 OS=Saccharomyces cerevisiae (strain ATCC 204508 / S288c) GN=PUF6 PE=1 SV=1	3	1	1	1	6	3	11	7.12042	2.98019	22.9307	10.9471	2.53688e-08	5.18428e-08	9.48022	0.940582	0.74182	0.74182	Total_CL - Total_NoCL	limma	2.53688e-08	5.18428e-08	TRUE	enriched hit	7.12042	FALSE	TRUE	TRUE
529	TY1B	P0C2I7|Q03434|Q03612|Q04711|Q12269|Q12414|Q12490	Transposon Ty1-BL Gag-Pol polyprotein OS=Saccharomyces cerevisiae (strain ATCC 204508 / S288c) GN=TY1B-BL PE=1 SV=1|Transposon Ty1-ER1 Gag-Pol polyprotein OS=Saccharomyces cerevisiae (strain ATCC 204508 / S288c) GN=TY1B-ER1 PE=3 SV=1|Transposon Ty1-GR2 Gag-Pol polyprotein OS=Saccharomyces cerevisiae (strain ATCC 204508 / S288c) GN=TY1B-GR2 PE=3 SV=3|Transposon Ty1-LR4 Gag-Pol polyprotein OS=Sacch…	3	1	1	1	6	3	30	7.26667	2.83405	24.8621	10.9415	2.55368e-08	5.20872e-08	9.47347	0.940613	0.74182	0.74182	Total_CL - Total_NoCL	limma	2.55368e-08	5.20872e-08	TRUE	enriched hit	7.26667	FALSE	TRUE	TRUE
530	MCM3	P24279	DNA replication licensing factor MCM3 OS=Saccharomyces cerevisiae (strain ATCC 204508 / S288c) GN=MCM3 PE=1 SV=1	2	1	1	NA	6	2	4	5.62779	2.89598	19.8523	10.9083	2.65512e-08	5.3956e-08	9.49422	0.940792	0.74182	0.74182	Total_CL - Total_NoCL	limma	2.65512e-08	5.3956e-08	TRUE	enriched hit	5.62779	FALSE	TRUE	TRUE
531	YMR099C	Q03161	Glucose-6-phosphate 1-epimerase OS=Saccharomyces cerevisiae (strain ATCC 204508 / S288c) GN=YMR099C PE=1 SV=1	3	1	1	1	6	3	3	5.69184	3.97702	20.3652	10.9082	2.65529e-08	5.3956e-08	9.43636	0.940793	0.74182	0.74182	Total_CL - Total_NoCL	limma	2.65529e-08	5.3956e-08	TRUE	enriched hit	5.69184	TRUE	TRUE	FALSE
532	RTG2	P32608	Retrograde regulation protein 2 OS=Saccharomyces cerevisiae (strain ATCC 204508 / S288c) GN=RTG2 PE=1 SV=2	3	1	1	1	6	3	4	5.79317	2.8636	20.3744	10.8982	2.68685e-08	5.44945e-08	9.42427	0.940847	0.74182	0.74182	Total_CL - Total_NoCL	limma	2.68685e-08	5.44945e-08	TRUE	enriched hit	5.79317	FALSE	TRUE	TRUE
533	AVT1	P47082	Vacuolar amino acid transporter 1 OS=Saccharomyces cerevisiae (strain ATCC 204508 / S288c) GN=AVT1 PE=1 SV=1	2	1	NA	1	6	2	3	5.69988	1.96606	20.6756	10.8962	2.69322e-08	5.45213e-08	9.47506	0.940858	0.74182	0.74182	Total_CL - Total_NoCL	limma	2.69322e-08	5.45213e-08	TRUE	enriched hit	5.69988	FALSE	TRUE	TRUE
534	SRP101	P32916	Signal recognition particle receptor subunit alpha homolog OS=Saccharomyces cerevisiae (strain ATCC 204508 / S288c) GN=SRP101 PE=1 SV=2	3	1	1	1	6	3	5	5.92574	4.00656	20.1435	10.8915	2.70816e-08	5.4721e-08	9.49072	0.940884	0.74182	0.74182	Total_CL - Total_NoCL	limma	2.70816e-08	5.4721e-08	TRUE	enriched hit	5.92574	FALSE	TRUE	TRUE
535	CTS1	P29029	Endochitinase OS=Saccharomyces cerevisiae (strain ATCC 204508 / S288c) GN=CTS1 PE=1 SV=2	3	1	1	1	6	3	2	6.47669	2.6932	22.847	10.8629	2.80067e-08	5.64846e-08	9.37892	0.941038	0.74182	0.74182	Total_CL - Total_NoCL	limma	2.80067e-08	5.64846e-08	TRUE	enriched hit	6.47669	TRUE	TRUE	FALSE
536	ALG5	P40350	Dolichyl-phosphate beta-glucosyltransferase OS=Saccharomyces cerevisiae (strain ATCC 204508 / S288c) GN=ALG5 PE=1 SV=1	3	1	1	1	6	3	3	5.78216	3.48889	20.63	10.8423	2.8698e-08	5.77708e-08	9.35683	0.94115	0.74182	0.74182	Total_CL - Total_NoCL	limma	2.8698e-08	5.77708e-08	TRUE	enriched hit	5.78216	FALSE	TRUE	TRUE
537	CBR1	P38626	NADH-cytochrome b5 reductase 1 OS=Saccharomyces cerevisiae (strain ATCC 204508 / S288c) GN=CBR1 PE=1 SV=2	3	1	1	1	6	3	6	6.05766	4.31527	20.9936	10.8332	2.9007e-08	5.82842e-08	9.34297	0.941199	0.74182	0.74182	Total_CL - Total_NoCL	limma	2.9007e-08	5.82842e-08	TRUE	enriched hit	6.05766	TRUE	TRUE	FALSE
538	HRB1	P38922	Protein HRB1 OS=Saccharomyces cerevisiae (strain ATCC 204508 / S288c) GN=HRB1 PE=1 SV=2	3	1	1	1	6	3	8	6.51495	4.25295	22.7562	10.8263	2.9245e-08	5.8653e-08	9.3346	0.941237	0.74182	0.74182	Total_CL - Total_NoCL	limma	2.9245e-08	5.8653e-08	TRUE	enriched hit	6.51495	FALSE	TRUE	TRUE
539	ILV5	P06168	Ketol-acid reductoisomerase, mitochondrial OS=Saccharomyces cerevisiae (strain ATCC 204508 / S288c) GN=ILV5 PE=1 SV=1	3	1	1	1	6	3	9	6.73196	3.05352	22.7785	10.8124	2.97273e-08	5.95097e-08	9.31785	0.941312	0.74182	0.74182	Total_CL - Total_NoCL	limma	2.97273e-08	5.95097e-08	TRUE	enriched hit	6.73196	TRUE	TRUE	FALSE
540	BMS1	Q08965	Ribosome biogenesis protein BMS1 OS=Saccharomyces cerevisiae (strain ATCC 204508 / S288c) GN=BMS1 PE=1 SV=1	3	1	1	1	6	3	15	6.34137	2.9685	23.0772	10.8091	2.98442e-08	5.96331e-08	9.31383	0.94133	0.74182	0.74182	Total_CL - Total_NoCL	limma	2.98442e-08	5.96331e-08	TRUE	enriched hit	6.34137	FALSE	TRUE	TRUE
541	YNL115C	P53925	Uncharacterized vacuolar membrane protein YNL115C OS=Saccharomyces cerevisiae (strain ATCC 204508 / S288c) GN=YNL115C PE=1 SV=1	3	1	1	1	6	3	2	5.78086	2.93232	19.8876	10.8005	3.01509e-08	6.01347e-08	9.31751	0.941377	0.74182	0.74182	Total_CL - Total_NoCL	limma	3.01509e-08	6.01347e-08	TRUE	enriched hit	5.78086	FALSE	TRUE	TRUE
542	SAM1	P10659	S-adenosylmethionine synthase 1 OS=Saccharomyces cerevisiae (strain ATCC 204508 / S288c) GN=SAM1 PE=1 SV=2	3	1	1	1	6	3	4	6.83442	4.03265	22.2386	10.7915	3.04723e-08	6.06635e-08	9.29249	0.941425	0.74182	0.74182	Total_CL - Total_NoCL	limma	3.04723e-08	6.06635e-08	TRUE	enriched hit	6.83442	TRUE	TRUE	FALSE
543	TPA1	P40032	Prolyl 3,4-dihydroxylase TPA1 OS=Saccharomyces cerevisiae (strain ATCC 204508 / S288c) GN=TPA1 PE=1 SV=1	3	1	1	1	6	3	2	5.82061	3.1861	20.5282	10.7884	3.05867e-08	6.07139e-08	9.28865	0.941442	0.74182	0.74182	Total_CL - Total_NoCL	limma	3.05867e-08	6.07139e-08	TRUE	enriched hit	5.82061	FALSE	TRUE	TRUE
544	MAK21	Q12176	Ribosome biogenesis protein MAK21 OS=Saccharomyces cerevisiae (strain ATCC 204508 / S288c) GN=MAK21 PE=1 SV=1	3	1	1	1	6	3	9	6.3778	2.86015	22.2551	10.7867	3.06484e-08	6.07139e-08	9.28659	0.941451	0.74182	0.74182	Total_CL - Total_NoCL	limma	3.06484e-08	6.07139e-08	TRUE	enriched hit	6.3778	FALSE	TRUE	TRUE
545	MTC1	P47018	Maintenance of telomere capping protein 1 OS=Saccharomyces cerevisiae (strain ATCC 204508 / S288c) GN=MTC1 PE=1 SV=1	3	1	1	1	6	3	11	6.05445	3.02264	22.2174	10.7862	3.06664e-08	6.07139e-08	9.28598	0.941454	0.74182	0.74182	Total_CL - Total_NoCL	limma	3.06664e-08	6.07139e-08	TRUE	enriched hit	6.05445	FALSE	TRUE	TRUE
546	MYO5	Q04439	Myosin-5 OS=Saccharomyces cerevisiae (strain ATCC 204508 / S288c) GN=MYO5 PE=1 SV=1	3	1	1	1	6	3	5	5.79471	2.57098	21.1633	10.7697	3.12705e-08	6.17194e-08	9.26599	0.941543	0.74182	0.74182	Total_CL - Total_NoCL	limma	3.12705e-08	6.17194e-08	TRUE	enriched hit	5.79471	FALSE	TRUE	TRUE
547	ALA1	P40825|P40825-2	Alanine--tRNA ligase, mitochondrial OS=Saccharomyces cerevisiae (strain ATCC 204508 / S288c) GN=ALA1 PE=1 SV=3|Isoform Cytoplasmic of Alanine--tRNA ligase, mitochondrial OS=Saccharomyces cerevisiae (strain ATCC 204508 / S288c) GN=ALA1	3	1	1	1	6	3	30	6.9202	3.54817	24.9124	10.7692	3.12887e-08	6.17194e-08	9.2654	0.941546	0.74182	0.74182	Total_CL - Total_NoCL	limma	3.12887e-08	6.17194e-08	TRUE	enriched hit	6.9202	TRUE	TRUE	FALSE
548	RPS31	P05759	Ubiquitin-40S ribosomal protein S31 OS=Saccharomyces cerevisiae (strain ATCC 204508 / S288c) GN=RPS31 PE=1 SV=3	2	NA	1	1	6	2	3	7.29119	6.811	20.713	10.7541	3.1857e-08	6.27256e-08	8.74293	0.941628	0.74182	0.74182	Total_CL - Total_NoCL	limma	3.1857e-08	6.27256e-08	TRUE	enriched hit	7.29119	TRUE	TRUE	FALSE
549	NRD1	P53617	Protein NRD1 OS=Saccharomyces cerevisiae (strain ATCC 204508 / S288c) GN=NRD1 PE=1 SV=1	2	1	1	NA	5	2	4	5.7404	3.80916	21.1384	10.7473	3.21134e-08	6.31154e-08	9.34148	0.941665	0.74182	0.74182	Total_CL - Total_NoCL	limma	3.21134e-08	6.31154e-08	TRUE	enriched hit	5.7404	FALSE	TRUE	TRUE
550	ATO3	Q12359	Ammonia transport outward protein 3 OS=Saccharomyces cerevisiae (strain ATCC 204508 / S288c) GN=ATO3 PE=1 SV=1	3	1	1	1	6	3	4	6.31818	2.24225	20.8345	10.7364	3.25325e-08	6.38228e-08	9.24084	0.941724	0.74182	0.74182	Total_CL - Total_NoCL	limma	3.25325e-08	6.38228e-08	TRUE	enriched hit	6.31818	FALSE	TRUE	TRUE
551	NPA3	P47122	GPN-loop GTPase 1 OS=Saccharomyces cerevisiae (strain ATCC 204508 / S288c) GN=NPA3 PE=1 SV=1	3	1	1	1	6	3	3	6.00857	3.77269	20.8164	10.7262	3.29291e-08	6.44837e-08	9.24731	0.941779	0.74182	0.74182	Total_CL - Total_NoCL	limma	3.29291e-08	6.44837e-08	TRUE	enriched hit	6.00857	FALSE	TRUE	TRUE
552	SDA1	P53313	Protein SDA1 OS=Saccharomyces cerevisiae (strain ATCC 204508 / S288c) GN=SDA1 PE=1 SV=1	3	1	1	1	6	3	6	6.28633	3.18873	22.669	10.7195	3.31946e-08	6.48858e-08	9.2048	0.941815	0.74182	0.74182	Total_CL - Total_NoCL	limma	3.31946e-08	6.48858e-08	TRUE	enriched hit	6.28633	FALSE	TRUE	TRUE
553	HIP1	P06775	Histidine permease OS=Saccharomyces cerevisiae (strain ATCC 204508 / S288c) GN=HIP1 PE=1 SV=2	2	1	1	NA	6	2	3	6.12203	2.2212	20.401	10.6947	3.41913e-08	6.67133e-08	9.23763	0.94195	0.74182	0.74182	Total_CL - Total_NoCL	limma	3.41913e-08	6.67133e-08	TRUE	enriched hit	6.12203	FALSE	TRUE	TRUE
554	CYS3	P31373	Cystathionine gamma-lyase OS=Saccharomyces cerevisiae (strain ATCC 204508 / S288c) GN=CYS3 PE=1 SV=2	3	1	1	1	6	3	4	6.08771	3.09853	21.31	10.6882	3.44572e-08	6.71106e-08	9.16654	0.941985	0.74182	0.74182	Total_CL - Total_NoCL	limma	3.44572e-08	6.71106e-08	TRUE	enriched hit	6.08771	TRUE	TRUE	FALSE
555	PMC1	P38929	Calcium-transporting ATPase 2 OS=Saccharomyces cerevisiae (strain ATCC 204508 / S288c) GN=PMC1 PE=1 SV=1	3	1	1	1	6	3	5	5.73071	2.46344	20.3174	10.6719	3.51334e-08	6.83044e-08	9.14662	0.942073	0.74182	0.74182	Total_CL - Total_NoCL	limma	3.51334e-08	6.83044e-08	TRUE	enriched hit	5.73071	FALSE	TRUE	TRUE
556	RKI1	Q12189	Ribose-5-phosphate isomerase OS=Saccharomyces cerevisiae (strain ATCC 204508 / S288c) GN=RKI1 PE=1 SV=1	3	1	1	1	6	3	4	6.26599	3.12923	20.844	10.6376	3.6606e-08	7.09676e-08	9.10453	0.942259	0.74182	0.74182	Total_CL - Total_NoCL	limma	3.6606e-08	7.09676e-08	TRUE	enriched hit	6.26599	FALSE	TRUE	TRUE
557	DRS1	P32892	ATP-dependent RNA helicase DRS1 OS=Saccharomyces cerevisiae (strain ATCC 204508 / S288c) GN=DRS1 PE=1 SV=2	3	1	1	1	6	3	8	6.30098	3.64891	22.7286	10.6369	3.66348e-08	7.09676e-08	9.10372	0.942263	0.74182	0.74182	Total_CL - Total_NoCL	limma	3.66348e-08	7.09676e-08	TRUE	enriched hit	6.30098	TRUE	TRUE	FALSE
558	MET6	P05694	5-methyltetrahydropteroyltriglutamate--homocysteine methyltransferase OS=Saccharomyces cerevisiae (strain ATCC 204508 / S288c) GN=MET6 PE=1 SV=4	3	1	1	1	6	3	21	6.74472	3.54294	23.7692	10.6168	3.75323e-08	7.24529e-08	9.0789	0.942372	0.74182	0.74182	Total_CL - Total_NoCL	limma	3.75323e-08	7.24529e-08	TRUE	enriched hit	6.74472	FALSE	TRUE	TRUE
559	ENA2	Q01896	Sodium transport ATPase 2 OS=Saccharomyces cerevisiae (strain ATCC 204508 / S288c) GN=ENA2 PE=1 SV=1	3	1	1	1	6	3	15	6.83641	2.50847	23.9198	10.6163	3.75537e-08	7.24529e-08	9.07832	0.942375	0.74182	0.74182	Total_CL - Total_NoCL	limma	3.75537e-08	7.24529e-08	TRUE	enriched hit	6.83641	FALSE	TRUE	TRUE
560	VMA8	P32610	V-type proton ATPase subunit D OS=Saccharomyces cerevisiae (strain ATCC 204508 / S288c) GN=VMA8 PE=1 SV=1	2	1	1	NA	6	2	3	5.7438	3.46345	20.3538	10.6152	3.7603e-08	7.24529e-08	9.13651	0.942381	0.74182	0.74182	Total_CL - Total_NoCL	limma	3.7603e-08	7.24529e-08	TRUE	enriched hit	5.7438	TRUE	TRUE	FALSE
561	YDJ1	P25491	Mitochondrial protein import protein MAS5 OS=Saccharomyces cerevisiae (strain ATCC 204508 / S288c) GN=YDJ1 PE=1 SV=1	3	1	1	1	6	3	7	6.37968	4.14527	21.4679	10.6132	3.76935e-08	7.24979e-08	9.07451	0.942391	0.74182	0.74182	Total_CL - Total_NoCL	limma	3.76935e-08	7.24979e-08	TRUE	enriched hit	6.37968	TRUE	TRUE	FALSE
562	ACO2	P39533	Homocitrate dehydratase, mitochondrial OS=Saccharomyces cerevisiae (strain ATCC 204508 / S288c) GN=ACO2 PE=1 SV=1	2	1	1	NA	6	2	3	5.7785	4.3604	19.7488	10.6058	3.80317e-08	7.30182e-08	9.17045	0.942432	0.74182	0.74182	Total_CL - Total_NoCL	limma	3.80317e-08	7.30182e-08	TRUE	enriched hit	5.7785	FALSE	TRUE	TRUE
563	FUN12	P39730	Eukaryotic translation initiation factor 5B OS=Saccharomyces cerevisiae (strain ATCC 204508 / S288c) GN=FUN12 PE=1 SV=2	3	1	1	1	6	3	20	7.01424	3.14837	24.6248	10.6019	3.821e-08	7.32301e-08	9.06056	0.942453	0.74182	0.74182	Total_CL - Total_NoCL	limma	3.821e-08	7.32301e-08	TRUE	enriched hit	7.01424	FALSE	TRUE	TRUE
564	EIS1	Q05050	Eisosome protein 1 OS=Saccharomyces cerevisiae (strain ATCC 204508 / S288c) GN=EIS1 PE=1 SV=1	3	1	1	1	6	3	12	6.26107	2.85181	23.1233	10.5908	3.87219e-08	7.40797e-08	9.04691	0.942513	0.74182	0.74182	Total_CL - Total_NoCL	limma	3.87219e-08	7.40797e-08	TRUE	enriched hit	6.26107	FALSE	TRUE	TRUE
565	PMT3	P47190	Dolichyl-phosphate-mannose--protein mannosyltransferase 3 OS=Saccharomyces cerevisiae (strain ATCC 204508 / S288c) GN=PMT3 PE=1 SV=2	3	1	1	1	6	3	7	6.31434	1.98885	22.1039	10.5814	3.91628e-08	7.47905e-08	9.03831	0.942564	0.74182	0.74182	Total_CL - Total_NoCL	limma	3.91628e-08	7.47905e-08	TRUE	enriched hit	6.31434	FALSE	TRUE	TRUE
566	ATP2	P00830	ATP synthase subunit beta, mitochondrial OS=Saccharomyces cerevisiae (strain ATCC 204508 / S288c) GN=ATP2 PE=1 SV=2	3	1	1	1	6	3	11	6.24387	3.14531	21.9637	10.564	3.99921e-08	7.62394e-08	9.01381	0.942658	0.74182	0.74182	Total_CL - Total_NoCL	limma	3.99921e-08	7.62394e-08	TRUE	enriched hit	6.24387	TRUE	TRUE	FALSE
567	NRP1	P32770	Asparagine-rich protein OS=Saccharomyces cerevisiae (strain ATCC 204508 / S288c) GN=NRP1 PE=1 SV=2	3	1	1	1	6	3	3	5.66738	3.82047	19.9104	10.5601	4.01771e-08	7.6457e-08	9.09956	0.942679	0.74182	0.74182	Total_CL - Total_NoCL	limma	4.01771e-08	7.6457e-08	TRUE	enriched hit	5.66738	FALSE	TRUE	TRUE
568	BAT1	P38891	Branched-chain-amino-acid aminotransferase, mitochondrial OS=Saccharomyces cerevisiae (strain ATCC 204508 / S288c) GN=BAT1 PE=1 SV=1	2	1	1	NA	6	2	3	5.79172	2.69268	20.7356	10.5546	4.04465e-08	7.6834e-08	9.06249	0.942709	0.74182	0.74182	Total_CL - Total_NoCL	limma	4.04465e-08	7.6834e-08	TRUE	enriched hit	5.79172	FALSE	TRUE	TRUE
569	HSP104	P31539	Heat shock protein 104 OS=Saccharomyces cerevisiae (strain ATCC 204508 / S288c) GN=HSP104 PE=1 SV=2	3	1	1	1	6	3	8	6.32188	2.21684	22.91	10.5463	4.08527e-08	7.74694e-08	8.99197	0.942754	0.74182	0.74182	Total_CL - Total_NoCL	limma	4.08527e-08	7.74694e-08	TRUE	enriched hit	6.32188	FALSE	TRUE	TRUE
570	PHO88	P38264	Inorganic phosphate transport protein PHO88 OS=Saccharomyces cerevisiae (strain ATCC 204508 / S288c) GN=PHO88 PE=1 SV=1	3	1	1	1	6	3	6	6.42532	2.29298	22.2795	10.5224	4.20474e-08	7.9595e-08	8.9624	0.942883	0.74182	0.74182	Total_CL - Total_NoCL	limma	4.20474e-08	7.9595e-08	TRUE	enriched hit	6.42532	FALSE	TRUE	TRUE
571	BGL2	P15703	Glucan 1,3-beta-glucosidase OS=Saccharomyces cerevisiae (strain ATCC 204508 / S288c) GN=BGL2 PE=1 SV=1	3	1	1	1	6	3	5	6.75466	2.3494	23.1029	10.5189	4.22293e-08	7.97992e-08	8.95798	0.942902	0.74182	0.74182	Total_CL - Total_NoCL	limma	4.22293e-08	7.97992e-08	TRUE	enriched hit	6.75466	FALSE	TRUE	TRUE
572	PAN1	P32521	Actin cytoskeleton-regulatory complex protein PAN1 OS=Saccharomyces cerevisiae (strain ATCC 204508 / S288c) GN=PAN1 PE=1 SV=2	2	1	1	NA	6	2	4	5.62056	2.47173	21.0598	10.5157	4.23925e-08	7.99678e-08	9.01958	0.94292	0.74182	0.74182	Total_CL - Total_NoCL	limma	4.23925e-08	7.99678e-08	TRUE	enriched hit	5.62056	FALSE	TRUE	TRUE
573	YPS7	Q06325	Aspartic proteinase yapsin-7 OS=Saccharomyces cerevisiae (strain ATCC 204508 / S288c) GN=YPS7 PE=1 SV=1	2	1	1	NA	6	2	3	6.11386	2.1299	20.4346	10.5069	4.28431e-08	8.06766e-08	9.00885	0.942967	0.74182	0.74182	Total_CL - Total_NoCL	limma	4.28431e-08	8.06766e-08	TRUE	enriched hit	6.11386	TRUE	TRUE	FALSE
574	SRV2	P17555	Adenylyl cyclase-associated protein OS=Saccharomyces cerevisiae (strain ATCC 204508 / S288c) GN=SRV2 PE=1 SV=1	3	1	1	1	6	3	7	6.57106	2.80876	22.291	10.501	4.31507e-08	8.11143e-08	8.93584	0.942999	0.74182	0.74182	Total_CL - Total_NoCL	limma	4.31507e-08	8.11143e-08	TRUE	enriched hit	6.57106	FALSE	TRUE	TRUE
575	PTC2	P39966	Protein phosphatase 2C homolog 2 OS=Saccharomyces cerevisiae (strain ATCC 204508 / S288c) GN=PTC2 PE=1 SV=1	3	1	1	1	6	3	2	5.90563	3.22511	19.9856	10.4978	4.33198e-08	8.12906e-08	8.96919	0.943017	0.74182	0.74182	Total_CL - Total_NoCL	limma	4.33198e-08	8.12906e-08	TRUE	enriched hit	5.90563	FALSE	TRUE	TRUE
576	RRP9	Q06506	Ribosomal RNA-processing protein 9 OS=Saccharomyces cerevisiae (strain ATCC 204508 / S288c) GN=RRP9 PE=1 SV=1	3	1	1	1	6	3	7	6.04397	3.09601	22.6903	10.4964	4.33956e-08	8.12914e-08	8.93003	0.943024	0.74182	0.74182	Total_CL - Total_NoCL	limma	4.33956e-08	8.12914e-08	TRUE	enriched hit	6.04397	FALSE	TRUE	TRUE
577	PDA1	P16387	Pyruvate dehydrogenase E1 component subunit alpha, mitochondrial OS=Saccharomyces cerevisiae (strain ATCC 204508 / S288c) GN=PDA1 PE=1 SV=2	3	1	1	1	6	3	3	6.00851	3.45553	20.8069	10.4902	4.37183e-08	8.17539e-08	8.92549	0.943058	0.74182	0.74182	Total_CL - Total_NoCL	limma	4.37183e-08	8.17539e-08	TRUE	enriched hit	6.00851	FALSE	TRUE	TRUE
578	DSE4	P53753	Endo-1,3(4)-beta-glucanase 1 OS=Saccharomyces cerevisiae (strain ATCC 204508 / S288c) GN=DSE4 PE=1 SV=1	3	1	1	1	6	3	4	5.94451	2.74683	20.5357	10.4799	4.42686e-08	8.26398e-08	8.9371	0.943114	0.74182	0.74182	Total_CL - Total_NoCL	limma	4.42686e-08	8.26398e-08	TRUE	enriched hit	5.94451	FALSE	TRUE	TRUE
579	PAT1	P25644	DNA topoisomerase 2-associated protein PAT1 OS=Saccharomyces cerevisiae (strain ATCC 204508 / S288c) GN=PAT1 PE=1 SV=4	3	1	1	1	6	3	6	5.99334	3.87502	21.3054	10.4762	4.44671e-08	8.28671e-08	8.905	0.943134	0.74182	0.74182	Total_CL - Total_NoCL	limma	4.44671e-08	8.28671e-08	TRUE	enriched hit	5.99334	FALSE	TRUE	TRUE
580	KAP123	P40069	Importin subunit beta-4 OS=Saccharomyces cerevisiae (strain ATCC 204508 / S288c) GN=KAP123 PE=1 SV=1	3	1	1	1	6	3	18	6.71452	3.28718	22.9229	10.466	4.50225e-08	8.37573e-08	8.89227	0.943189	0.74182	0.74182	Total_CL - Total_NoCL	limma	4.50225e-08	8.37573e-08	TRUE	enriched hit	6.71452	FALSE	TRUE	TRUE
581	CDC39	P25655	General negative regulator of transcription subunit 1 OS=Saccharomyces cerevisiae (strain ATCC 204508 / S288c) GN=CDC39 PE=1 SV=3	3	1	1	1	6	3	8	6.1226	2.95468	21.2161	10.4555	4.55983e-08	8.46364e-08	8.8823	0.943246	0.74182	0.74182	Total_CL - Total_NoCL	limma	4.55983e-08	8.46364e-08	TRUE	enriched hit	6.1226	FALSE	TRUE	TRUE
582	SAR1	P20606	Small COPII coat GTPase SAR1 OS=Saccharomyces cerevisiae (strain ATCC 204508 / S288c) GN=SAR1 PE=1 SV=1	3	1	1	1	6	3	3	5.91562	3.58252	20.099	10.4546	4.56519e-08	8.46364e-08	9.00367	0.943251	0.74182	0.74182	Total_CL - Total_NoCL	limma	4.56519e-08	8.46364e-08	TRUE	enriched hit	5.91562	FALSE	TRUE	TRUE
583	REH1	Q06709	Cytoplasmic 60S subunit biogenesis factor REH1 OS=Saccharomyces cerevisiae (strain ATCC 204508 / S288c) GN=REH1 PE=1 SV=1	2	1	1	NA	6	2	3	5.95662	4.08396	20.7171	10.444	4.62421e-08	8.55622e-08	8.92645	0.943308	0.74182	0.74182	Total_CL - Total_NoCL	limma	4.62421e-08	8.55622e-08	TRUE	enriched hit	5.95662	TRUE	TRUE	FALSE
584	DYS1	P38791	Deoxyhypusine synthase OS=Saccharomyces cerevisiae (strain ATCC 204508 / S288c) GN=DYS1 PE=1 SV=1	2	1	1	NA	6	2	4	6.31497	4.07561	19.5532	10.4428	4.63098e-08	8.55622e-08	8.92497	0.943315	0.74182	0.74182	Total_CL - Total_NoCL	limma	4.63098e-08	8.55622e-08	TRUE	enriched hit	6.31497	TRUE	TRUE	FALSE
585	YPR114W	Q06107	Uncharacterized TLC domain-containing protein YPR114W OS=Saccharomyces cerevisiae (strain ATCC 204508 / S288c) GN=YPR114W PE=1 SV=1	2	1	1	NA	6	2	3	6.28362	2.3311	21.066	10.44	4.64687e-08	8.5709e-08	8.92149	0.94333	0.74182	0.74182	Total_CL - Total_NoCL	limma	4.64687e-08	8.5709e-08	TRUE	enriched hit	6.28362	FALSE	TRUE	TRUE
586	ALD4	P46367	Potassium-activated aldehyde dehydrogenase, mitochondrial OS=Saccharomyces cerevisiae (strain ATCC 204508 / S288c) GN=ALD4 PE=1 SV=2	3	1	1	1	6	3	3	5.71761	2.97198	20.4289	10.4362	4.66809e-08	8.59533e-08	8.85824	0.94335	0.74182	0.74182	Total_CL - Total_NoCL	limma	4.66809e-08	8.59533e-08	TRUE	enriched hit	5.71761	FALSE	TRUE	TRUE
587	GPM1	P00950	Phosphoglycerate mutase 1 OS=Saccharomyces cerevisiae (strain ATCC 204508 / S288c) GN=GPM1 PE=1 SV=3	3	1	1	1	6	3	7	6.9801	2.09025	23.5222	10.4251	4.73204e-08	8.69824e-08	8.84119	0.943411	0.74182	0.74182	Total_CL - Total_NoCL	limma	4.73204e-08	8.69824e-08	TRUE	enriched hit	6.9801	FALSE	TRUE	TRUE
588	NHP6A	P11632	Non-histone chromosomal protein 6A OS=Saccharomyces cerevisiae (strain ATCC 204508 / S288c) GN=NHP6A PE=1 SV=1	3	1	1	1	6	3	3	6.64201	4.27224	21.1893	10.4194	4.76463e-08	8.74325e-08	8.83724	0.943441	0.74182	0.74182	Total_CL - Total_NoCL	limma	4.76463e-08	8.74325e-08	TRUE	enriched hit	6.64201	TRUE	TRUE	FALSE
589	YMR147W	P40218	Uncharacterized protein YMR147W OS=Saccharomyces cerevisiae (strain ATCC 204508 / S288c) GN=YMR147W PE=1 SV=1	3	1	1	1	6	3	3	5.92615	2.51197	20.011	10.411	4.81351e-08	8.81796e-08	8.82677	0.943487	0.74182	0.74182	Total_CL - Total_NoCL	limma	4.81351e-08	8.81796e-08	TRUE	enriched hit	5.92615	FALSE	TRUE	TRUE
590	HBS1	P32769	Elongation factor 1 alpha-like protein OS=Saccharomyces cerevisiae (strain ATCC 204508 / S288c) GN=HBS1 PE=1 SV=2	2	1	1	NA	6	2	2	5.91634	3.38653	20.8593	10.4018	4.86823e-08	8.90309e-08	8.87419	0.943537	0.74182	0.74182	Total_CL - Total_NoCL	limma	4.86823e-08	8.90309e-08	TRUE	enriched hit	5.91634	FALSE	TRUE	TRUE
591	STE20	Q03497	Serine/threonine-protein kinase STE20 OS=Saccharomyces cerevisiae (strain ATCC 204508 / S288c) GN=STE20 PE=1 SV=1	3	1	1	1	6	3	6	5.70627	3.20238	20.7534	10.3885	4.94761e-08	9.03295e-08	8.79547	0.943609	0.74182	0.74182	Total_CL - Total_NoCL	limma	4.94761e-08	9.03295e-08	TRUE	enriched hit	5.70627	FALSE	TRUE	TRUE
592	NOP58	Q12499	Nucleolar protein 58 OS=Saccharomyces cerevisiae (strain ATCC 204508 / S288c) GN=NOP58 PE=1 SV=1	3	1	1	1	6	3	15	7.07208	3.00633	23.8298	10.3667	5.08111e-08	9.26102e-08	8.76814	0.943727	0.74182	0.74182	Total_CL - Total_NoCL	limma	5.08111e-08	9.26102e-08	TRUE	enriched hit	7.07208	FALSE	TRUE	TRUE
593	SPT5	P27692	Transcription elongation factor SPT5 OS=Saccharomyces cerevisiae (strain ATCC 204508 / S288c) GN=SPT5 PE=1 SV=1	3	1	1	1	6	3	23	7.17473	2.76557	24.8711	10.3576	5.13839e-08	9.34962e-08	8.75664	0.943777	0.74182	0.74182	Total_CL - Total_NoCL	limma	5.13839e-08	9.34962e-08	TRUE	enriched hit	7.17473	FALSE	TRUE	TRUE
594	LIA1	P47120	Deoxyhypusine hydroxylase OS=Saccharomyces cerevisiae (strain ATCC 204508 / S288c) GN=LIA1 PE=1 SV=1	3	1	1	1	6	3	7	6.40338	3.99733	22.0162	10.3555	5.15109e-08	9.35695e-08	8.7541	0.943788	0.74182	0.74182	Total_CL - Total_NoCL	limma	5.15109e-08	9.35695e-08	TRUE	enriched hit	6.40338	FALSE	TRUE	TRUE
595	FMP42	Q04991	Protein FMP42 OS=Saccharomyces cerevisiae (strain ATCC 204508 / S288c) GN=FMP42 PE=1 SV=1	3	1	1	1	6	3	4	6.24264	2.41248	21.0135	10.3505	5.18269e-08	9.39853e-08	8.75998	0.943815	0.74182	0.74182	Total_CL - Total_NoCL	limma	5.18269e-08	9.39853e-08	TRUE	enriched hit	6.24264	FALSE	TRUE	TRUE
596	YGR026W	P53217	Uncharacterized membrane protein YGR026W OS=Saccharomyces cerevisiae (strain ATCC 204508 / S288c) GN=YGR026W PE=1 SV=1	3	1	1	1	6	3	2	6.24408	2.44837	21.1373	10.3366	5.27227e-08	9.54493e-08	8.73024	0.94389	0.74182	0.74182	Total_CL - Total_NoCL	limma	5.27227e-08	9.54493e-08	TRUE	enriched hit	6.24408	FALSE	TRUE	TRUE
597	SSA1	P10591	Heat shock protein SSA1 OS=Saccharomyces cerevisiae (strain ATCC 204508 / S288c) GN=SSA1 PE=1 SV=4	3	1	1	1	6	3	4	6.44123	3.2428	22.3384	10.3242	5.35293e-08	9.67473e-08	8.71465	0.943958	0.74182	0.74182	Total_CL - Total_NoCL	limma	5.35293e-08	9.67473e-08	TRUE	enriched hit	6.44123	TRUE	TRUE	FALSE
598	OLE1	P21147	Acyl-CoA desaturase 1 OS=Saccharomyces cerevisiae (strain ATCC 204508 / S288c) GN=OLE1 PE=1 SV=2	3	1	1	1	6	3	5	6.45786	3.16151	21.5727	10.2916	5.57139e-08	1.00495e-07	8.67358	0.944134	0.74182	0.74182	Total_CL - Total_NoCL	limma	5.57139e-08	1.00495e-07	TRUE	enriched hit	6.45786	FALSE	TRUE	TRUE
599	LSB3	P43603	LAS seventeen-binding protein 3 OS=Saccharomyces cerevisiae (strain ATCC 204508 / S288c) GN=LSB3 PE=1 SV=3	3	1	1	1	6	3	4	5.83921	3.47701	20.3692	10.2905	5.57889e-08	1.00495e-07	8.6722	0.94414	0.74182	0.74182	Total_CL - Total_NoCL	limma	5.57889e-08	1.00495e-07	TRUE	enriched hit	5.83921	TRUE	TRUE	FALSE
600	PDI1	P17967	Protein disulfide-isomerase OS=Saccharomyces cerevisiae (strain ATCC 204508 / S288c) GN=PDI1 PE=1 SV=2	3	1	1	1	6	3	16	6.67348	3.92968	23.3262	10.2756	5.68255e-08	1.02191e-07	8.6533	0.944221	0.74182	0.74182	Total_CL - Total_NoCL	limma	5.68255e-08	1.02191e-07	TRUE	enriched hit	6.67348	TRUE	TRUE	FALSE
601	DIP2	Q12220	U3 small nucleolar RNA-associated protein 12 OS=Saccharomyces cerevisiae (strain ATCC 204508 / S288c) GN=DIP2 PE=1 SV=1	3	1	1	1	6	3	12	6.21676	2.54379	22.3372	10.2652	5.75555e-08	1.03332e-07	8.64782	0.944277	0.74182	0.74182	Total_CL - Total_NoCL	limma	5.75555e-08	1.03332e-07	TRUE	enriched hit	6.21676	FALSE	TRUE	TRUE
602	SYG1	P40528	Protein SYG1 OS=Saccharomyces cerevisiae (strain ATCC 204508 / S288c) GN=SYG1 PE=1 SV=1	2	1	1	NA	6	2	2	5.57132	2.48126	19.9947	10.263	5.77109e-08	1.03439e-07	8.70632	0.944289	0.74182	0.74182	Total_CL - Total_NoCL	limma	5.77109e-08	1.03439e-07	TRUE	enriched hit	5.57132	FALSE	TRUE	TRUE
603	PTC7	P38797	Protein phosphatase 2C homolog 7, mitochondrial OS=Saccharomyces cerevisiae (strain ATCC 204508 / S288c) GN=PTC7 PE=1 SV=2	3	1	1	1	6	3	3	5.77015	3.30452	20.3324	10.2464	5.89062e-08	1.05406e-07	8.61637	0.944379	0.74182	0.74182	Total_CL - Total_NoCL	limma	5.89062e-08	1.05406e-07	TRUE	enriched hit	5.77015	TRUE	TRUE	FALSE
604	TED1	P40533	Protein TED1 OS=Saccharomyces cerevisiae (strain ATCC 204508 / S288c) GN=TED1 PE=1 SV=1	3	1	1	1	6	3	5	6.3228	2.71295	21.8641	10.2421	5.92159e-08	1.0564e-07	8.61416	0.944402	0.74182	0.74182	Total_CL - Total_NoCL	limma	5.92159e-08	1.0564e-07	TRUE	enriched hit	6.3228	FALSE	TRUE	TRUE
605	PMR1	P13586	Calcium-transporting ATPase 1 OS=Saccharomyces cerevisiae (strain ATCC 204508 / S288c) GN=PMR1 PE=1 SV=1	3	1	1	1	6	3	10	6.62571	2.36666	22.5566	10.2419	5.92329e-08	1.0564e-07	8.61069	0.944403	0.74182	0.74182	Total_CL - Total_NoCL	limma	5.92329e-08	1.0564e-07	TRUE	enriched hit	6.62571	FALSE	TRUE	TRUE
606	ARG4	P04076	Argininosuccinate lyase OS=Saccharomyces cerevisiae (strain ATCC 204508 / S288c) GN=ARG4 PE=1 SV=2	2	1	1	NA	6	2	4	5.70202	3.37103	19.8386	10.2396	5.93985e-08	1.05761e-07	8.67703	0.944416	0.74182	0.74182	Total_CL - Total_NoCL	limma	5.93985e-08	1.05761e-07	TRUE	enriched hit	5.70202	FALSE	TRUE	TRUE
607	ILV1	P00927	Threonine dehydratase, mitochondrial OS=Saccharomyces cerevisiae (strain ATCC 204508 / S288c) GN=ILV1 PE=1 SV=2	3	1	1	1	6	3	4	5.84894	4.5385	20.4141	10.2241	6.05489e-08	1.07631e-07	8.66995	0.9445	0.74182	0.74182	Total_CL - Total_NoCL	limma	6.05489e-08	1.07631e-07	TRUE	enriched hit	5.84894	TRUE	TRUE	FALSE
608	PRO2	P54885	Gamma-glutamyl phosphate reductase OS=Saccharomyces cerevisiae (strain ATCC 204508 / S288c) GN=PRO2 PE=1 SV=1	3	1	1	1	6	3	7	6.37046	2.68021	22.6086	10.1985	6.24984e-08	1.10914e-07	8.55557	0.944639	0.74182	0.74182	Total_CL - Total_NoCL	limma	6.24984e-08	1.10914e-07	TRUE	enriched hit	6.37046	FALSE	TRUE	TRUE
609	PWP2	P25635	Periodic tryptophan protein 2 OS=Saccharomyces cerevisiae (strain ATCC 204508 / S288c) GN=PWP2 PE=1 SV=2	3	1	1	1	6	3	16	6.57305	2.964	23.3396	10.1798	6.39664e-08	1.13333e-07	8.53172	0.94474	0.74182	0.74182	Total_CL - Total_NoCL	limma	6.39664e-08	1.13333e-07	TRUE	enriched hit	6.57305	FALSE	TRUE	TRUE
610	THR4	P16120	Threonine synthase OS=Saccharomyces cerevisiae (strain ATCC 204508 / S288c) GN=THR4 PE=1 SV=1	3	1	1	1	6	3	8	6.23943	2.91992	22.222	10.1636	6.52595e-08	1.15434e-07	8.51116	0.944828	0.74182	0.74182	Total_CL - Total_NoCL	limma	6.52595e-08	1.15434e-07	TRUE	enriched hit	6.23943	TRUE	TRUE	FALSE
611	PFK1	P16861	ATP-dependent 6-phosphofructokinase subunit alpha OS=Saccharomyces cerevisiae (strain ATCC 204508 / S288c) GN=PFK1 PE=1 SV=1	3	1	1	1	6	3	28	7.40372	2.73674	24.8453	10.1456	6.67394e-08	1.17859e-07	8.48813	0.944925	0.74182	0.74182	Total_CL - Total_NoCL	limma	6.67394e-08	1.17859e-07	TRUE	enriched hit	7.40372	FALSE	TRUE	TRUE
612	ALG9	P53868	Alpha-1,2-mannosyltransferase ALG9 OS=Saccharomyces cerevisiae (strain ATCC 204508 / S288c) GN=ALG9 PE=1 SV=1	2	1	NA	1	6	2	3	6.24608	2.0436	20.9713	10.1397	6.72305e-08	1.18532e-07	8.54582	0.944957	0.74182	0.74182	Total_CL - Total_NoCL	limma	6.72305e-08	1.18532e-07	TRUE	enriched hit	6.24608	FALSE	TRUE	TRUE
613	NSG2	P53898	Protein NSG2 OS=Saccharomyces cerevisiae (strain ATCC 204508 / S288c) GN=NSG2 PE=1 SV=1	2	1	NA	1	6	2	2	5.79263	2.87826	20.6323	10.0679	7.35262e-08	1.2942e-07	8.46005	0.945346	0.74182	0.74182	Total_CL - Total_NoCL	limma	7.35262e-08	1.2942e-07	TRUE	enriched hit	5.79263	FALSE	TRUE	TRUE
614	MDM20	Q12387	N-terminal acetyltransferase B complex subunit MDM20 OS=Saccharomyces cerevisiae (strain ATCC 204508 / S288c) GN=MDM20 PE=1 SV=1	3	1	1	1	6	3	4	5.78902	3.46302	20.2498	10.066	7.37081e-08	1.29529e-07	8.39394	0.945357	0.74182	0.74182	Total_CL - Total_NoCL	limma	7.37081e-08	1.29529e-07	TRUE	enriched hit	5.78902	FALSE	TRUE	TRUE
615	PUF4	P25339	Pumilio homology domain family member 4 OS=Saccharomyces cerevisiae (strain ATCC 204508 / S288c) GN=PUF4 PE=1 SV=2	3	1	1	1	6	3	7	6.43938	4.98713	21.7667	10.0571	7.45322e-08	1.30765e-07	8.37465	0.945405	0.74182	0.74182	Total_CL - Total_NoCL	limma	7.45322e-08	1.30765e-07	TRUE	enriched hit	6.43938	FALSE	TRUE	TRUE
616	SEY1	Q99287	Protein SEY1 OS=Saccharomyces cerevisiae (strain ATCC 204508 / S288c) GN=SEY1 PE=1 SV=1	3	1	1	1	6	3	6	5.79102	3.46427	20.8805	10.0452	7.5651e-08	1.32512e-07	8.36261	0.94547	0.74182	0.74182	Total_CL - Total_NoCL	limma	7.5651e-08	1.32512e-07	TRUE	enriched hit	5.79102	FALSE	TRUE	TRUE
617	TPS1	Q00764	Alpha,alpha-trehalose-phosphate synthase [UDP-forming] 56 kDa subunit OS=Saccharomyces cerevisiae (strain ATCC 204508 / S288c) GN=TPS1 PE=1 SV=2	3	1	1	1	6	3	3	6.06822	2.51667	21.0418	10.0302	7.70902e-08	1.34814e-07	8.33997	0.945551	0.74182	0.74182	Total_CL - Total_NoCL	limma	7.70902e-08	1.34814e-07	TRUE	enriched hit	6.06822	FALSE	TRUE	TRUE
618	DYN1	P36022	Dynein heavy chain, cytoplasmic OS=Saccharomyces cerevisiae (strain ATCC 204508 / S288c) GN=DYN1 PE=1 SV=1	2	1	1	NA	6	2	2	6.88881	2.8255	21.7747	10.023	7.77862e-08	1.35811e-07	8.39732	0.94559	0.74182	0.74182	Total_CL - Total_NoCL	limma	7.77862e-08	1.35811e-07	TRUE	enriched hit	6.88881	FALSE	TRUE	TRUE
619	MSC6	Q08818	Meiotic sister-chromatid recombination protein 6, mitochondrial OS=Saccharomyces cerevisiae (strain ATCC 204508 / S288c) GN=MSC6 PE=1 SV=1	3	1	1	1	6	3	6	5.71577	4.85615	20.3161	9.96982	8.3167e-08	1.44971e-07	8.26198	0.945878	0.74182	0.74182	Total_CL - Total_NoCL	limma	8.3167e-08	1.44971e-07	TRUE	enriched hit	5.71577	FALSE	TRUE	TRUE
620	SCS3	P53012	FIT family protein SCS3 OS=Saccharomyces cerevisiae (strain ATCC 204508 / S288c) GN=SCS3 PE=1 SV=1	3	1	1	1	6	3	2	6.22403	2.4663	19.5882	9.95676	8.45475e-08	1.4714e-07	8.26247	0.945949	0.74182	0.74182	Total_CL - Total_NoCL	limma	8.45475e-08	1.4714e-07	TRUE	enriched hit	6.22403	FALSE	TRUE	TRUE
621	CSR1	Q06705	Phosphatidylinositol transfer protein CSR1 OS=Saccharomyces cerevisiae (strain ATCC 204508 / S288c) GN=CSR1 PE=1 SV=1	3	1	1	1	6	3	5	5.90019	3.12746	21.3464	9.94923	8.53545e-08	1.48305e-07	8.23529	0.94599	0.74182	0.74182	Total_CL - Total_NoCL	limma	8.53545e-08	1.48305e-07	TRUE	enriched hit	5.90019	FALSE	TRUE	TRUE
622	LAC1	P28496	Sphingosine N-acyltransferase LAC1 OS=Saccharomyces cerevisiae (strain ATCC 204508 / S288c) GN=LAC1 PE=1 SV=2	3	1	1	1	6	3	2	6.29865	2.17813	21.7043	9.92166	8.83813e-08	1.53317e-07	8.19946	0.946139	0.74182	0.74182	Total_CL - Total_NoCL	limma	8.83813e-08	1.53317e-07	TRUE	enriched hit	6.29865	FALSE	TRUE	TRUE
623	YBL036C	P38197	UPF0001 protein YBL036C OS=Saccharomyces cerevisiae (strain ATCC 204508 / S288c) GN=YBL036C PE=1 SV=1	3	1	1	1	6	3	4	5.92451	4.05235	20.8197	9.91971	8.86e-08	1.5345e-07	8.19692	0.94615	0.74182	0.74182	Total_CL - Total_NoCL	limma	8.86e-08	1.5345e-07	TRUE	enriched hit	5.92451	TRUE	TRUE	FALSE
624	YRB1	P41920	Ran-specific GTPase-activating protein 1 OS=Saccharomyces cerevisiae (strain ATCC 204508 / S288c) GN=YRB1 PE=1 SV=1	2	1	1	NA	6	2	4	6.41981	2.88808	22.1534	9.91098	8.95839e-08	1.54905e-07	8.25344	0.946197	0.74182	0.74182	Total_CL - Total_NoCL	limma	8.95839e-08	1.54905e-07	TRUE	enriched hit	6.41981	FALSE	TRUE	TRUE
625	WTM1	Q12363	Transcriptional modulator WTM1 OS=Saccharomyces cerevisiae (strain ATCC 204508 / S288c) GN=WTM1 PE=1 SV=1	3	1	1	1	6	3	3	6.14329	2.5082	21.1232	9.89106	9.18741e-08	1.58611e-07	8.1596	0.946305	0.74182	0.74182	Total_CL - Total_NoCL	limma	9.18741e-08	1.58611e-07	TRUE	enriched hit	6.14329	FALSE	TRUE	TRUE
626	RSE1	Q04693	Pre-mRNA-splicing factor RSE1 OS=Saccharomyces cerevisiae (strain ATCC 204508 / S288c) GN=RSE1 PE=1 SV=1	2	1	1	NA	6	2	3	5.56912	2.50197	19.6604	9.88073	9.30853e-08	1.60446e-07	8.21436	0.946361	0.74182	0.74182	Total_CL - Total_NoCL	limma	9.30853e-08	1.60446e-07	TRUE	enriched hit	5.56912	FALSE	TRUE	TRUE
627	PRP43	P53131	Pre-mRNA-splicing factor ATP-dependent RNA helicase PRP43 OS=Saccharomyces cerevisiae (strain ATCC 204508 / S288c) GN=PRP43 PE=1 SV=1	3	1	1	1	6	3	9	6.2704	2.74919	22.6557	9.87547	9.37088e-08	1.61263e-07	8.13927	0.946389	0.74182	0.74182	Total_CL - Total_NoCL	limma	9.37088e-08	1.61263e-07	TRUE	enriched hit	6.2704	FALSE	TRUE	TRUE
628	DTD1	Q07648	D-tyrosyl-tRNA(Tyr) deacylase OS=Saccharomyces cerevisiae (strain ATCC 204508 / S288c) GN=DTD1 PE=1 SV=1	3	1	1	1	6	3	3	5.99276	3.91579	20.3042	9.85918	9.5669e-08	1.64374e-07	8.16159	0.946478	0.74182	0.74182	Total_CL - Total_NoCL	limma	9.5669e-08	1.64374e-07	TRUE	enriched hit	5.99276	TRUE	TRUE	FALSE
629	RPF1	P38805	Ribosome production factor 1 OS=Saccharomyces cerevisiae (strain ATCC 204508 / S288c) GN=RPF1 PE=1 SV=1	3	1	1	1	6	3	3	5.79894	3.33417	20.3469	9.85497	9.61819e-08	1.64992e-07	8.11857	0.946501	0.74182	0.74182	Total_CL - Total_NoCL	limma	9.61819e-08	1.64992e-07	TRUE	enriched hit	5.79894	FALSE	TRUE	TRUE
630	STH1	P32597	Nuclear protein STH1/NPS1 OS=Saccharomyces cerevisiae (strain ATCC 204508 / S288c) GN=STH1 PE=1 SV=1	3	1	1	1	6	3	3	5.60245	2.06431	20.6075	9.84564	9.73302e-08	1.66697e-07	8.10027	0.946551	0.74182	0.74182	Total_CL - Total_NoCL	limma	9.73302e-08	1.66697e-07	TRUE	enriched hit	5.60245	FALSE	TRUE	TRUE
631	YFR016C	P43597	Uncharacterized protein YFR016C OS=Saccharomyces cerevisiae (strain ATCC 204508 / S288c) GN=YFR016C PE=1 SV=1	3	1	1	1	6	3	25	6.68808	2.58128	23.4339	9.83855	9.82126e-08	1.67942e-07	8.09099	0.94659	0.74182	0.74182	Total_CL - Total_NoCL	limma	9.82126e-08	1.67942e-07	TRUE	enriched hit	6.68808	FALSE	TRUE	TRUE
632	NUP188	P52593	Nucleoporin NUP188 OS=Saccharomyces cerevisiae (strain ATCC 204508 / S288c) GN=NUP188 PE=1 SV=1	2	1	1	NA	6	2	5	5.6082	2.12678	20.7381	9.82869	9.94533e-08	1.69795e-07	8.15256	0.946643	0.74182	0.74182	Total_CL - Total_NoCL	limma	9.94533e-08	1.69795e-07	TRUE	enriched hit	5.6082	FALSE	TRUE	TRUE
633	PRE9	P23638	Proteasome subunit alpha type-3 OS=Saccharomyces cerevisiae (strain ATCC 204508 / S288c) GN=PRE9 PE=1 SV=1	3	1	1	1	6	3	3	5.83542	4.20411	19.9234	9.80753	1.02174e-07	1.74164e-07	8.19858	0.946758	0.74182	0.74182	Total_CL - Total_NoCL	limma	1.02174e-07	1.74164e-07	TRUE	enriched hit	5.83542	TRUE	TRUE	FALSE
634	NUM1	Q00402	Nuclear migration protein NUM1 OS=Saccharomyces cerevisiae (strain ATCC 204508 / S288c) GN=NUM1 PE=1 SV=2	3	1	1	1	6	3	26	6.18583	2.2871	24.6396	9.80611	1.02359e-07	1.74205e-07	8.04845	0.946765	0.74182	0.74182	Total_CL - Total_NoCL	limma	1.02359e-07	1.74205e-07	TRUE	enriched hit	6.18583	TRUE	TRUE	FALSE
635	RIO2	P40160	Serine/threonine-protein kinase RIO2 OS=Saccharomyces cerevisiae (strain ATCC 204508 / S288c) GN=RIO2 PE=1 SV=1	3	1	1	1	6	3	7	6.29486	2.94933	22.4653	9.78155	1.05622e-07	1.79475e-07	8.01617	0.946899	0.74182	0.74182	Total_CL - Total_NoCL	limma	1.05622e-07	1.79475e-07	TRUE	enriched hit	6.29486	FALSE	TRUE	TRUE
636	TDH3	P00359	Glyceraldehyde-3-phosphate dehydrogenase 3 OS=Saccharomyces cerevisiae (strain ATCC 204508 / S288c) GN=TDH3 PE=1 SV=3	3	1	1	1	6	3	4	6.40411	3.67153	22.3483	9.76075	1.08471e-07	1.84026e-07	7.98879	0.947011	0.74182	0.74182	Total_CL - Total_NoCL	limma	1.08471e-07	1.84026e-07	TRUE	enriched hit	6.40411	TRUE	TRUE	FALSE
637	VMA2	P16140	V-type proton ATPase subunit B OS=Saccharomyces cerevisiae (strain ATCC 204508 / S288c) GN=VMA2 PE=1 SV=2	3	1	1	1	6	3	13	7.21578	2.69178	23.6163	9.74921	1.10088e-07	1.86476e-07	7.97357	0.947074	0.74182	0.74182	Total_CL - Total_NoCL	limma	1.10088e-07	1.86476e-07	TRUE	enriched hit	7.21578	TRUE	TRUE	FALSE
638	SHM1	P37292	Serine hydroxymethyltransferase, mitochondrial OS=Saccharomyces cerevisiae (strain ATCC 204508 / S288c) GN=SHM1 PE=1 SV=2	3	1	1	1	6	3	3	5.59038	2.87261	20.6484	9.73888	1.11556e-07	1.88666e-07	8.05359	0.94713	0.74182	0.74182	Total_CL - Total_NoCL	limma	1.11556e-07	1.88666e-07	TRUE	enriched hit	5.59038	FALSE	TRUE	TRUE
639	ALD5	P40047	Aldehyde dehydrogenase 5, mitochondrial OS=Saccharomyces cerevisiae (strain ATCC 204508 / S288c) GN=ALD5 PE=1 SV=4	3	1	1	1	6	3	6	5.82317	3.17635	20.3457	9.68952	1.18863e-07	2.00709e-07	7.89465	0.947397	0.74182	0.74182	Total_CL - Total_NoCL	limma	1.18863e-07	2.00709e-07	TRUE	enriched hit	5.82317	FALSE	TRUE	TRUE
640	RET2	P43621	Coatomer subunit delta OS=Saccharomyces cerevisiae (strain ATCC 204508 / S288c) GN=RET2 PE=1 SV=3	3	1	1	1	6	3	3	5.86757	3.64851	20.2726	9.68812	1.19078e-07	2.00758e-07	7.89279	0.947405	0.74182	0.74182	Total_CL - Total_NoCL	limma	1.19078e-07	2.00758e-07	TRUE	enriched hit	5.86757	FALSE	TRUE	TRUE
641	SNU13	P39990	13 kDa ribonucleoprotein-associated protein OS=Saccharomyces cerevisiae (strain ATCC 204508 / S288c) GN=SNU13 PE=1 SV=1	2	NA	1	1	6	2	3	5.90676	5.22591	20.2854	9.67583	1.20979e-07	2.03613e-07	7.60155	0.947472	0.74182	0.74182	Total_CL - Total_NoCL	limma	1.20979e-07	2.03613e-07	TRUE	enriched hit	5.90676	TRUE	TRUE	FALSE
642	RPA135	P22138	DNA-directed RNA polymerase I subunit RPA135 OS=Saccharomyces cerevisiae (strain ATCC 204508 / S288c) GN=RPA135 PE=1 SV=1	3	1	1	1	6	3	10	6.35884	2.55629	22.3429	9.67474	1.21149e-07	2.03613e-07	7.87505	0.947478	0.74182	0.74182	Total_CL - Total_NoCL	limma	1.21149e-07	2.03613e-07	TRUE	enriched hit	6.35884	TRUE	TRUE	FALSE
643	PMT2	P31382	Dolichyl-phosphate-mannose--protein mannosyltransferase 2 OS=Saccharomyces cerevisiae (strain ATCC 204508 / S288c) GN=PMT2 PE=1 SV=2	3	1	1	1	6	3	11	7.06042	2.1542	22.8163	9.66268	1.23049e-07	2.06485e-07	7.85903	0.947543	0.74182	0.74182	Total_CL - Total_NoCL	limma	1.23049e-07	2.06485e-07	TRUE	enriched hit	7.06042	FALSE	TRUE	TRUE
644	SAM3	Q08986	S-adenosylmethionine permease SAM3 OS=Saccharomyces cerevisiae (strain ATCC 204508 / S288c) GN=SAM3 PE=1 SV=1	3	1	1	1	6	3	6	6.43983	2.07241	21.6144	9.63297	1.27864e-07	2.14232e-07	7.82298	0.947704	0.74182	0.74182	Total_CL - Total_NoCL	limma	1.27864e-07	2.14232e-07	TRUE	enriched hit	6.43983	FALSE	TRUE	TRUE
645	ERG3	P32353	Delta(7)-sterol 5(6)-desaturase OS=Saccharomyces cerevisiae (strain ATCC 204508 / S288c) GN=ERG3 PE=1 SV=1	3	1	1	1	6	3	3	6.31435	2.60195	21.1508	9.59247	1.34755e-07	2.25427e-07	7.76897	0.947924	0.74182	0.74182	Total_CL - Total_NoCL	limma	1.34755e-07	2.25427e-07	TRUE	enriched hit	6.31435	FALSE	TRUE	TRUE
646	TPM2	P40414	Tropomyosin-2 OS=Saccharomyces cerevisiae (strain ATCC 204508 / S288c) GN=TPM2 PE=1 SV=1	3	1	1	1	6	3	11	7.33327	4.95239	22.4035	9.58792	1.35553e-07	2.26411e-07	7.76289	0.947948	0.74182	0.74182	Total_CL - Total_NoCL	limma	1.35553e-07	2.26411e-07	TRUE	enriched hit	7.33327	TRUE	TRUE	FALSE
647	RPS29A	P41057	40S ribosomal protein S29-A OS=Saccharomyces cerevisiae (strain ATCC 204508 / S288c) GN=RPS29A PE=1 SV=3	2	NA	1	1	6	2	3	6.89412	6.24488	21.3334	9.55894	1.40756e-07	2.34739e-07	7.51321	0.948105	0.74182	0.74182	Total_CL - Total_NoCL	limma	1.40756e-07	2.34739e-07	TRUE	enriched hit	6.89412	FALSE	TRUE	TRUE
648	GLY1	P37303	Low specificity L-threonine aldolase OS=Saccharomyces cerevisiae (strain ATCC 204508 / S288c) GN=GLY1 PE=1 SV=2	3	1	1	1	6	3	4	6.22212	3.32422	20.9259	9.55593	1.41307e-07	2.35294e-07	7.71662	0.948122	0.74182	0.74182	Total_CL - Total_NoCL	limma	1.41307e-07	2.35294e-07	TRUE	enriched hit	6.22212	FALSE	TRUE	TRUE
649	UTR2	P32623	Probable glycosidase CRH2 OS=Saccharomyces cerevisiae (strain ATCC 204508 / S288c) GN=UTR2 PE=1 SV=3	3	1	1	1	6	3	5	7.60791	1.63144	23.7932	9.5525	1.4194e-07	2.35984e-07	7.71202	0.94814	0.74182	0.74182	Total_CL - Total_NoCL	limma	1.4194e-07	2.35984e-07	TRUE	enriched hit	7.60791	TRUE	TRUE	FALSE
650	YPK9	Q12697	Vacuolar cation-transporting ATPase YPK9 OS=Saccharomyces cerevisiae (strain ATCC 204508 / S288c) GN=YPK9 PE=1 SV=1	2	1	1	NA	4	2	3	5.52033	3.0464	20.9148	9.53438	1.45331e-07	2.41249e-07	7.7891	0.948239	0.74182	0.74182	Total_CL - Total_NoCL	limma	1.45331e-07	2.41249e-07	TRUE	enriched hit	5.52033	FALSE	TRUE	TRUE
651	STE24	P47154	CAAX prenyl protease 1 OS=Saccharomyces cerevisiae (strain ATCC 204508 / S288c) GN=STE24 PE=1 SV=1	3	1	1	1	5	3	3	5.61546	3.60453	19.8391	9.52696	1.46744e-07	2.43221e-07	7.71002	0.948279	0.74182	0.74182	Total_CL - Total_NoCL	limma	1.46744e-07	2.43221e-07	TRUE	enriched hit	5.61546	FALSE	TRUE	TRUE
652	MEF1	P25039	Elongation factor G, mitochondrial OS=Saccharomyces cerevisiae (strain ATCC 204508 / S288c) GN=MEF1 PE=1 SV=2	2	1	1	NA	5	2	4	5.60461	4.28699	20.8171	9.52426	1.47261e-07	2.43703e-07	7.85161	0.948293	0.74182	0.74182	Total_CL - Total_NoCL	limma	1.47261e-07	2.43703e-07	TRUE	enriched hit	5.60461	FALSE	TRUE	TRUE
653	INP53	Q12271	Polyphosphatidylinositol phosphatase INP53 OS=Saccharomyces cerevisiae (strain ATCC 204508 / S288c) GN=INP53 PE=1 SV=1	3	1	1	1	6	3	4	5.86968	3.36722	19.9847	9.51597	1.48864e-07	2.45979e-07	7.69477	0.948338	0.74182	0.74182	Total_CL - Total_NoCL	limma	1.48864e-07	2.45979e-07	TRUE	enriched hit	5.86968	FALSE	TRUE	TRUE
654	TRL1	P09880	tRNA ligase OS=Saccharomyces cerevisiae (strain ATCC 204508 / S288c) GN=TRL1 PE=1 SV=1	3	1	1	1	6	3	4	5.84613	3.90226	20.5679	9.51251	1.49537e-07	2.46714e-07	7.65833	0.948357	0.74182	0.74182	Total_CL - Total_NoCL	limma	1.49537e-07	2.46714e-07	TRUE	enriched hit	5.84613	FALSE	TRUE	TRUE
655	CDC11	P32458	Cell division control protein 11 OS=Saccharomyces cerevisiae (strain ATCC 204508 / S288c) GN=CDC11 PE=1 SV=1	3	1	1	1	6	3	4	5.50242	2.84296	19.7169	9.50769	1.50483e-07	2.47895e-07	7.65535	0.948383	0.74182	0.74182	Total_CL - Total_NoCL	limma	1.50483e-07	2.47895e-07	TRUE	enriched hit	5.50242	FALSE	TRUE	TRUE
656	TPS3	P38426	Trehalose synthase complex regulatory subunit TPS3 OS=Saccharomyces cerevisiae (strain ATCC 204508 / S288c) GN=TPS3 PE=1 SV=3	3	1	1	1	6	3	5	5.75949	2.77291	20.8778	9.49946	1.52109e-07	2.50192e-07	7.64077	0.948428	0.74182	0.74182	Total_CL - Total_NoCL	limma	1.52109e-07	2.50192e-07	TRUE	enriched hit	5.75949	FALSE	TRUE	TRUE
657	CHA1	P25379	Catabolic L-serine/threonine dehydratase OS=Saccharomyces cerevisiae (strain ATCC 204508 / S288c) GN=CHA1 PE=1 SV=2	3	1	1	1	6	3	5	6.26139	3.71562	21.887	9.4837	1.55277e-07	2.55014e-07	7.61954	0.948513	0.74182	0.74182	Total_CL - Total_NoCL	limma	1.55277e-07	2.55014e-07	TRUE	enriched hit	6.26139	TRUE	TRUE	FALSE
658	THO2	P53552	THO complex subunit 2 OS=Saccharomyces cerevisiae (strain ATCC 204508 / S288c) GN=THO2 PE=1 SV=1	2	1	1	NA	6	2	4	5.55795	2.8167	20.4186	9.47755	1.56533e-07	2.56685e-07	7.69009	0.948547	0.74182	0.74182	Total_CL - Total_NoCL	limma	1.56533e-07	2.56685e-07	TRUE	enriched hit	5.55795	FALSE	TRUE	TRUE
659	TOS1	P38288	Protein TOS1 OS=Saccharomyces cerevisiae (strain ATCC 204508 / S288c) GN=TOS1 PE=1 SV=1	3	1	1	1	6	3	4	6.58896	2.30333	22.7444	9.46754	1.586e-07	2.5968e-07	7.59774	0.948601	0.74182	0.74182	Total_CL - Total_NoCL	limma	1.586e-07	2.5968e-07	TRUE	enriched hit	6.58896	FALSE	TRUE	TRUE
660	PMT5	P52867	Dolichyl-phosphate-mannose--protein mannosyltransferase 5 OS=Saccharomyces cerevisiae (strain ATCC 204508 / S288c) GN=PMT5 PE=1 SV=1	3	1	1	1	6	3	2	5.95324	2.71859	19.9303	9.43692	1.65101e-07	2.69765e-07	7.55637	0.948767	0.74182	0.74182	Total_CL - Total_NoCL	limma	1.65101e-07	2.69765e-07	TRUE	enriched hit	5.95324	FALSE	TRUE	TRUE
661	SEC31	P38968	Protein transport protein SEC31 OS=Saccharomyces cerevisiae (strain ATCC 204508 / S288c) GN=SEC31 PE=1 SV=3	3	1	1	1	6	3	5	6.20282	2.86978	21.5742	9.43619	1.65259e-07	2.69765e-07	7.55538	0.948771	0.74182	0.74182	Total_CL - Total_NoCL	limma	1.65259e-07	2.69765e-07	TRUE	enriched hit	6.20282	TRUE	TRUE	FALSE
662	ECM33	P38248	Cell wall protein ECM33 OS=Saccharomyces cerevisiae (strain ATCC 204508 / S288c) GN=ECM33 PE=1 SV=3	3	1	1	1	6	3	8	7.99459	1.9674	25.3705	9.4341	1.65715e-07	2.70101e-07	7.55254	0.948782	0.74182	0.74182	Total_CL - Total_NoCL	limma	1.65715e-07	2.70101e-07	TRUE	enriched hit	7.99459	TRUE	TRUE	FALSE
663	APL5	Q08951	AP-3 complex subunit delta OS=Saccharomyces cerevisiae (strain ATCC 204508 / S288c) GN=APL5 PE=1 SV=1	2	1	1	NA	6	2	6	5.6982	2.49105	20.1288	9.43063	1.66471e-07	2.70924e-07	7.62113	0.948801	0.74182	0.74182	Total_CL - Total_NoCL	limma	1.66471e-07	2.70924e-07	TRUE	enriched hit	5.6982	FALSE	TRUE	TRUE
664	YHL017W	P38745	Uncharacterized membrane protein YHL071W OS=Saccharomyces cerevisiae (strain ATCC 204508 / S288c) GN=YHL017W PE=1 SV=1	3	1	1	1	5	3	3	5.8295	2.03973	20.3172	9.42112	1.68567e-07	2.73921e-07	7.5677	0.948853	0.74182	0.74182	Total_CL - Total_NoCL	limma	1.68567e-07	2.73921e-07	TRUE	enriched hit	5.8295	FALSE	TRUE	TRUE
665	ASN2	P49090	Asparagine synthetase [glutamine-hydrolyzing] 2 OS=Saccharomyces cerevisiae (strain ATCC 204508 / S288c) GN=ASN2 PE=1 SV=2	3	1	1	1	6	3	4	5.96965	3.83393	19.8964	9.40104	1.73081e-07	2.80834e-07	7.64164	0.948961	0.74182	0.74182	Total_CL - Total_NoCL	limma	1.73081e-07	2.80834e-07	TRUE	enriched hit	5.96965	TRUE	TRUE	FALSE
666	SGT2	Q12118	Small glutamine-rich tetratricopeptide repeat-containing protein 2 OS=Saccharomyces cerevisiae (strain ATCC 204508 / S288c) GN=SGT2 PE=1 SV=1	3	1	1	1	6	3	10	6.70785	3.67883	23.1544	9.39273	1.74986e-07	2.83499e-07	7.49647	0.949006	0.74182	0.74182	Total_CL - Total_NoCL	limma	1.74986e-07	2.83499e-07	TRUE	enriched hit	6.70785	TRUE	TRUE	FALSE
667	NDE1	P40215	External NADH-ubiquinone oxidoreductase 1, mitochondrial OS=Saccharomyces cerevisiae (strain ATCC 204508 / S288c) GN=NDE1 PE=1 SV=1	3	1	1	1	6	3	5	5.9454	2.88794	21.3998	9.384	1.77014e-07	2.86353e-07	7.4846	0.949054	0.74182	0.74182	Total_CL - Total_NoCL	limma	1.77014e-07	2.86353e-07	TRUE	enriched hit	5.9454	FALSE	TRUE	TRUE
668	YET1	P35723	Endoplasmic reticulum transmembrane protein 1 OS=Saccharomyces cerevisiae (strain ATCC 204508 / S288c) GN=YET1 PE=1 SV=2	3	1	1	1	6	3	3	6.10323	1.92927	20.9916	9.37958	1.78049e-07	2.87597e-07	7.50807	0.949078	0.74182	0.74182	Total_CL - Total_NoCL	limma	1.78049e-07	2.87597e-07	TRUE	enriched hit	6.10323	FALSE	TRUE	TRUE
669	IMD3	P50095	Inosine-5'-monophosphate dehydrogenase 3 OS=Saccharomyces cerevisiae (strain ATCC 204508 / S288c) GN=IMD3 PE=1 SV=1	3	1	1	1	6	3	4	6.37867	2.4303	22.616	9.36584	1.81309e-07	2.92425e-07	7.45991	0.949152	0.74182	0.74182	Total_CL - Total_NoCL	limma	1.81309e-07	2.92425e-07	TRUE	enriched hit	6.37867	FALSE	TRUE	TRUE
670	TMA19	P35691	Translationally-controlled tumor protein homolog OS=Saccharomyces cerevisiae (strain ATCC 204508 / S288c) GN=TMA19 PE=1 SV=1	3	1	1	1	6	3	7	6.75582	4.86406	22.5983	9.33549	1.88735e-07	3.03948e-07	7.51435	0.949317	0.74182	0.74182	Total_CL - Total_NoCL	limma	1.88735e-07	3.03948e-07	TRUE	enriched hit	6.75582	TRUE	TRUE	FALSE
671	SLA2	P33338	Protein SLA2 OS=Saccharomyces cerevisiae (strain ATCC 204508 / S288c) GN=SLA2 PE=1 SV=5	3	1	1	1	6	3	3	5.5875	3.36378	19.3603	9.33257	1.89467e-07	3.04673e-07	7.51849	0.949333	0.74182	0.74182	Total_CL - Total_NoCL	limma	1.89467e-07	3.04673e-07	TRUE	enriched hit	5.5875	FALSE	TRUE	TRUE
672	ERV29	P53337	ER-derived vesicles protein ERV29 OS=Saccharomyces cerevisiae (strain ATCC 204508 / S288c) GN=ERV29 PE=1 SV=1	3	1	1	1	4	3	3	6.66587	2.68574	20.7926	9.31885	1.92944e-07	3.09801e-07	7.42951	0.949407	0.74182	0.74182	Total_CL - Total_NoCL	limma	1.92944e-07	3.09801e-07	TRUE	enriched hit	6.66587	FALSE	TRUE	TRUE
673	UTP11	P34247	U3 small nucleolar RNA-associated protein 11 OS=Saccharomyces cerevisiae (strain ATCC 204508 / S288c) GN=UTP11 PE=1 SV=2	3	1	1	1	6	3	2	5.95967	3.42913	20.1757	9.30783	1.95785e-07	3.13896e-07	7.38077	0.949467	0.74182	0.74182	Total_CL - Total_NoCL	limma	1.95785e-07	3.13896e-07	TRUE	enriched hit	5.95967	FALSE	TRUE	TRUE
674	TAN1	P53072	tRNA acetyltransferase TAN1 OS=Saccharomyces cerevisiae (strain ATCC 204508 / S288c) GN=TAN1 PE=1 SV=1	3	1	1	1	6	3	3	5.88797	4.88744	20.4934	9.28339	2.02244e-07	3.23771e-07	7.52226	0.949599	0.74182	0.74182	Total_CL - Total_NoCL	limma	2.02244e-07	3.23771e-07	TRUE	enriched hit	5.88797	TRUE	TRUE	FALSE
675	RUD3	Q12234	GRIP domain-containing protein RUD3 OS=Saccharomyces cerevisiae (strain ATCC 204508 / S288c) GN=RUD3 PE=1 SV=1	2	1	1	NA	6	2	2	5.63079	2.86763	20.1943	9.24081	2.14048e-07	3.42159e-07	7.37057	0.94983	0.74182	0.74182	Total_CL - Total_NoCL	limma	2.14048e-07	3.42159e-07	TRUE	enriched hit	5.63079	FALSE	TRUE	TRUE
676	ADP1	P25371	Probable ATP-dependent permease OS=Saccharomyces cerevisiae (strain ATCC 204508 / S288c) GN=ADP1 PE=1 SV=2	3	1	1	1	6	3	14	7.01154	1.60503	24.3803	9.19618	2.27205e-07	3.62654e-07	7.22739	0.950072	0.74182	0.74182	Total_CL - Total_NoCL	limma	2.27205e-07	3.62654e-07	TRUE	enriched hit	7.01154	FALSE	TRUE	TRUE
677	RPA49	Q01080	DNA-directed RNA polymerase I subunit RPA49 OS=Saccharomyces cerevisiae (strain ATCC 204508 / S288c) GN=RPA49 PE=1 SV=2	2	1	NA	1	6	2	2	5.78615	2.4208	20.9487	9.17541	2.33618e-07	3.7234e-07	7.27474	0.950185	0.74182	0.74182	Total_CL - Total_NoCL	limma	2.33618e-07	3.7234e-07	TRUE	enriched hit	5.78615	FALSE	TRUE	TRUE
678	YLR257W	Q06146	Uncharacterized protein YLR257W OS=Saccharomyces cerevisiae (strain ATCC 204508 / S288c) GN=YLR257W PE=1 SV=1	3	1	1	1	6	3	3	5.85935	3.04829	20.1464	9.17395	2.34076e-07	3.72519e-07	7.19668	0.950193	0.74182	0.74182	Total_CL - Total_NoCL	limma	2.34076e-07	3.72519e-07	TRUE	enriched hit	5.85935	FALSE	TRUE	TRUE
679	RPL42A|RPL42B	P0CX27|P0CX28	60S ribosomal protein L42-A OS=Saccharomyces cerevisiae (strain ATCC 204508 / S288c) GN=RPL42A PE=1 SV=1|60S ribosomal protein L42-B OS=Saccharomyces cerevisiae (strain ATCC 204508 / S288c) GN=RPL42B PE=1 SV=1	3	1	1	1	6	3	4	7.09841	3.41039	23.2909	9.17151	2.34843e-07	3.7319e-07	7.19331	0.950206	0.74182	0.74182	Total_CL - Total_NoCL	limma	2.34843e-07	3.7319e-07	TRUE	enriched hit	7.09841	TRUE	TRUE	FALSE
680	EMW1	P42842	Essential for maintenance of the cell wall protein 1 OS=Saccharomyces cerevisiae (strain ATCC 204508 / S288c) GN=EMW1 PE=1 SV=1	3	1	1	1	6	3	4	5.90497	3.43919	20.5475	9.16922	2.35566e-07	3.73787e-07	7.20439	0.950218	0.74182	0.74182	Total_CL - Total_NoCL	limma	2.35566e-07	3.73787e-07	TRUE	enriched hit	5.90497	FALSE	TRUE	TRUE
681	POP1	P41812	Ribonucleases P/MRP protein subunit POP1 OS=Saccharomyces cerevisiae (strain ATCC 204508 / S288c) GN=POP1 PE=1 SV=1	3	1	1	1	6	3	11	6.28032	5.84285	21.8561	9.1475	2.42539e-07	3.84287e-07	7.16007	0.950336	0.74182	0.74182	Total_CL - Total_NoCL	limma	2.42539e-07	3.84287e-07	TRUE	enriched hit	6.28032	FALSE	TRUE	TRUE
682	GAS1	P22146	1,3-beta-glucanosyltransferase GAS1 OS=Saccharomyces cerevisiae (strain ATCC 204508 / S288c) GN=GAS1 PE=1 SV=2	3	1	1	1	6	3	16	8.28467	1.91531	25.3166	9.14295	2.44028e-07	3.86079e-07	7.15376	0.950361	0.74182	0.74182	Total_CL - Total_NoCL	limma	2.44028e-07	3.86079e-07	TRUE	enriched hit	8.28467	TRUE	TRUE	FALSE
683	ROK1	P45818	ATP-dependent RNA helicase ROK1 OS=Saccharomyces cerevisiae (strain ATCC 204508 / S288c) GN=ROK1 PE=1 SV=1	3	1	1	1	6	3	3	5.98056	3.21708	20.9512	9.13652	2.46148e-07	3.88863e-07	7.14484	0.950396	0.74182	0.74182	Total_CL - Total_NoCL	limma	2.46148e-07	3.88863e-07	TRUE	enriched hit	5.98056	FALSE	TRUE	TRUE
684	GAS5	Q08193	1,3-beta-glucanosyltransferase GAS5 OS=Saccharomyces cerevisiae (strain ATCC 204508 / S288c) GN=GAS5 PE=1 SV=1	3	1	1	1	6	3	10	8.09271	2.17751	24.3803	9.13158	2.47789e-07	3.90883e-07	7.13799	0.950422	0.74182	0.74182	Total_CL - Total_NoCL	limma	2.47789e-07	3.90883e-07	TRUE	enriched hit	8.09271	TRUE	TRUE	FALSE
685	EMP70	P32802	Transmembrane 9 superfamily member 1 OS=Saccharomyces cerevisiae (strain ATCC 204508 / S288c) GN=EMP70 PE=1 SV=2	3	1	1	1	6	3	4	6.63802	2.25246	21.5035	9.12768	2.49094e-07	3.92368e-07	7.14145	0.950444	0.74182	0.74182	Total_CL - Total_NoCL	limma	2.49094e-07	3.92368e-07	TRUE	enriched hit	6.63802	FALSE	TRUE	TRUE
686	RNA1	P11745	Ran GTPase-activating protein 1 OS=Saccharomyces cerevisiae (strain ATCC 204508 / S288c) GN=RNA1 PE=1 SV=2	3	1	1	1	6	3	5	6.05903	3.79643	20.9985	9.12396	2.50343e-07	3.9376e-07	7.12742	0.950464	0.74182	0.74182	Total_CL - Total_NoCL	limma	2.50343e-07	3.9376e-07	TRUE	enriched hit	6.05903	FALSE	TRUE	TRUE
687	STI1	P15705	Heat shock protein STI1 OS=Saccharomyces cerevisiae (strain ATCC 204508 / S288c) GN=STI1 PE=1 SV=1	3	1	1	1	6	3	14	6.43829	1.67418	24.1719	9.11677	2.5278e-07	3.97015e-07	7.11743	0.950503	0.74182	0.74182	Total_CL - Total_NoCL	limma	2.5278e-07	3.97015e-07	TRUE	enriched hit	6.43829	FALSE	TRUE	TRUE
688	YHC1	Q05900	U1 small nuclear ribonucleoprotein C OS=Saccharomyces cerevisiae (strain ATCC 204508 / S288c) GN=YHC1 PE=1 SV=1	3	1	1	1	6	3	3	5.91182	5.3294	20.3129	9.1129	2.54101e-07	3.98511e-07	7.30218	0.950524	0.74182	0.74182	Total_CL - Total_NoCL	limma	2.54101e-07	3.98511e-07	TRUE	enriched hit	5.91182	FALSE	TRUE	TRUE
689	LHP1	P33399	La protein homolog OS=Saccharomyces cerevisiae (strain ATCC 204508 / S288c) GN=LHP1 PE=1 SV=2	3	1	1	1	6	3	10	6.74989	5.40447	22.2015	9.10824	2.55704e-07	4.00443e-07	7.10558	0.950549	0.74182	0.74182	Total_CL - Total_NoCL	limma	2.55704e-07	4.00443e-07	TRUE	enriched hit	6.74989	TRUE	TRUE	FALSE
690	ERP2	P39704	Protein ERP2 OS=Saccharomyces cerevisiae (strain ATCC 204508 / S288c) GN=ERP2 PE=1 SV=1	2	1	1	NA	6	2	2	5.69231	3.15498	19.8766	9.09091	2.61755e-07	4.09231e-07	7.16495	0.950643	0.74182	0.74182	Total_CL - Total_NoCL	limma	2.61755e-07	4.09231e-07	TRUE	enriched hit	5.69231	FALSE	TRUE	TRUE
691	RSM27	P53305	Mitochondrial 37S ribosomal protein S27 OS=Saccharomyces cerevisiae (strain ATCC 204508 / S288c) GN=RSM27 PE=1 SV=1	2	NA	1	1	6	2	3	6.30714	6.70806	19.9898	9.08943	2.62277e-07	4.09231e-07	6.94301	0.950651	0.74182	0.74182	Total_CL - Total_NoCL	limma	2.62277e-07	4.09231e-07	TRUE	enriched hit	6.30714	FALSE	TRUE	TRUE
692	WSC2	P53832	Cell wall integrity and stress response component 2 OS=Saccharomyces cerevisiae (strain ATCC 204508 / S288c) GN=WSC2 PE=1 SV=1	3	1	1	1	6	3	4	6.62822	1.99347	22.2972	9.08893	2.62454e-07	4.09231e-07	7.07872	0.950654	0.74182	0.74182	Total_CL - Total_NoCL	limma	2.62454e-07	4.09231e-07	TRUE	enriched hit	6.62822	FALSE	TRUE	TRUE
693	NCL1	P38205	Multisite-specific tRNA:(cytosine-C(5))-methyltransferase OS=Saccharomyces cerevisiae (strain ATCC 204508 / S288c) GN=NCL1 PE=1 SV=1	3	1	1	1	6	3	23	6.78261	2.1342	24.3161	9.08118	2.65215e-07	4.12939e-07	7.06793	0.950696	0.74182	0.74182	Total_CL - Total_NoCL	limma	2.65215e-07	4.12939e-07	TRUE	enriched hit	6.78261	TRUE	TRUE	FALSE
694	PDR12	Q02785	ATP-dependent permease PDR12 OS=Saccharomyces cerevisiae (strain ATCC 204508 / S288c) GN=PDR12 PE=1 SV=1	3	1	1	1	6	3	20	6.89924	2.4505	23.9065	9.07755	2.66522e-07	4.14376e-07	7.06286	0.950715	0.74182	0.74182	Total_CL - Total_NoCL	limma	2.66522e-07	4.14376e-07	TRUE	enriched hit	6.89924	FALSE	TRUE	TRUE
695	ZEO1	Q08245	Protein ZEO1 OS=Saccharomyces cerevisiae (strain ATCC 204508 / S288c) GN=ZEO1 PE=1 SV=3	3	1	1	1	6	3	6	6.53783	1.98631	22.5945	9.06175	2.72278e-07	4.22716e-07	7.04083	0.950801	0.74182	0.74182	Total_CL - Total_NoCL	limma	2.72278e-07	4.22716e-07	TRUE	enriched hit	6.53783	TRUE	TRUE	FALSE
696	FUR1	P18562	Uracil phosphoribosyltransferase OS=Saccharomyces cerevisiae (strain ATCC 204508 / S288c) GN=FUR1 PE=1 SV=2	3	1	1	1	6	3	5	6.08848	2.86559	21.0475	9.05451	2.74959e-07	4.26266e-07	7.03072	0.95084	0.74182	0.74182	Total_CL - Total_NoCL	limma	2.74959e-07	4.26266e-07	TRUE	enriched hit	6.08848	FALSE	TRUE	TRUE
697	UTP18	P40362	U3 small nucleolar RNA-associated protein 18 OS=Saccharomyces cerevisiae (strain ATCC 204508 / S288c) GN=UTP18 PE=1 SV=1	2	1	1	NA	6	2	3	6.24664	2.88418	20.4877	9.04845	2.77226e-07	4.29164e-07	7.09966	0.950873	0.74182	0.74182	Total_CL - Total_NoCL	limma	2.77226e-07	4.29164e-07	TRUE	enriched hit	6.24664	FALSE	TRUE	TRUE
698	DRN1	P53255	CWF19-like protein DRN1 OS=Saccharomyces cerevisiae (strain ATCC 204508 / S288c) GN=DRN1 PE=1 SV=1	3	1	1	1	6	3	3	5.7158	4.35777	19.8016	9.0467	2.77883e-07	4.29565e-07	7.20605	0.950883	0.74182	0.74182	Total_CL - Total_NoCL	limma	2.77883e-07	4.29565e-07	TRUE	enriched hit	5.7158	FALSE	TRUE	TRUE
699	NAB3	P38996	Nuclear polyadenylated RNA-binding protein 3 OS=Saccharomyces cerevisiae (strain ATCC 204508 / S288c) GN=NAB3 PE=1 SV=1	3	1	1	1	6	3	6	6.8543	3.08319	22.1307	9.02828	2.84912e-07	4.398e-07	6.99406	0.950983	0.74182	0.74182	Total_CL - Total_NoCL	limma	2.84912e-07	4.398e-07	TRUE	enriched hit	6.8543	FALSE	TRUE	TRUE
700	EXG1	P23776	Glucan 1,3-beta-glucosidase I/II OS=Saccharomyces cerevisiae (strain ATCC 204508 / S288c) GN=EXG1 PE=1 SV=1	2	1	NA	1	6	2	2	6.20639	1.78164	20.9999	8.97891	3.04698e-07	4.6967e-07	7.00295	0.95125	0.74182	0.74182	Total_CL - Total_NoCL	limma	3.04698e-07	4.6967e-07	TRUE	enriched hit	6.20639	FALSE	TRUE	TRUE
701	UTP20	P35194	U3 small nucleolar RNA-associated protein 20 OS=Saccharomyces cerevisiae (strain ATCC 204508 / S288c) GN=UTP20 PE=1 SV=3	3	1	1	1	6	3	12	6.16053	3.3768	21.7583	8.94536	3.18969e-07	4.90966e-07	6.87761	0.951432	0.74182	0.74182	Total_CL - Total_NoCL	limma	3.18969e-07	4.90966e-07	TRUE	enriched hit	6.16053	FALSE	TRUE	TRUE
702	RPS1A	P33442	40S ribosomal protein S1-A OS=Saccharomyces cerevisiae (strain ATCC 204508 / S288c) GN=RPS1A PE=1 SV=2	3	1	1	1	6	3	5	7.36367	7.11976	21.4926	8.93666	3.22781e-07	4.96126e-07	6.86536	0.951479	0.74182	0.74182	Total_CL - Total_NoCL	limma	3.22781e-07	4.96126e-07	TRUE	enriched hit	7.36367	FALSE	TRUE	TRUE
703	UBR1	P19812	E3 ubiquitin-protein ligase UBR1 OS=Saccharomyces cerevisiae (strain ATCC 204508 / S288c) GN=UBR1 PE=1 SV=1	2	1	1	NA	6	2	4	5.71739	2.39431	20.3057	8.92233	3.29171e-07	5.05228e-07	6.92387	0.951557	0.74182	0.74182	Total_CL - Total_NoCL	limma	3.29171e-07	5.05228e-07	TRUE	enriched hit	5.71739	FALSE	TRUE	TRUE
704	CCT3	P39077	T-complex protein 1 subunit gamma OS=Saccharomyces cerevisiae (strain ATCC 204508 / S288c) GN=CCT3 PE=1 SV=2	3	1	1	1	6	3	5	6.1161	3.06965	20.9493	8.91479	3.32587e-07	5.09746e-07	6.83449	0.951598	0.74182	0.74182	Total_CL - Total_NoCL	limma	3.32587e-07	5.09746e-07	TRUE	enriched hit	6.1161	FALSE	TRUE	TRUE
705	RRB1	Q04225	Ribosome assembly protein RRB1 OS=Saccharomyces cerevisiae (strain ATCC 204508 / S288c) GN=RRB1 PE=1 SV=1	3	1	1	1	6	3	5	6.32921	3.19336	21.133	8.90642	3.3642e-07	5.1489e-07	6.82267	0.951643	0.74182	0.74182	Total_CL - Total_NoCL	limma	3.3642e-07	5.1489e-07	TRUE	enriched hit	6.32921	FALSE	TRUE	TRUE
706	EFB1	P32471	Elongation factor 1-beta OS=Saccharomyces cerevisiae (strain ATCC 204508 / S288c) GN=EFB1 PE=1 SV=4	3	1	1	1	6	3	4	7.044	3.76487	22.5728	8.87414	3.51658e-07	5.37449e-07	6.77697	0.951818	0.74182	0.74182	Total_CL - Total_NoCL	limma	3.51658e-07	5.37449e-07	TRUE	enriched hit	7.044	FALSE	TRUE	TRUE
707	YPT7	P32939	GTP-binding protein YPT7 OS=Saccharomyces cerevisiae (strain ATCC 204508 / S288c) GN=YPT7 PE=1 SV=1	3	1	1	1	6	3	3	5.84478	2.63906	20.5904	8.84557	3.65752e-07	5.58199e-07	6.73643	0.951973	0.74182	0.74182	Total_CL - Total_NoCL	limma	3.65752e-07	5.58199e-07	TRUE	enriched hit	5.84478	TRUE	TRUE	FALSE
708	CHS5	Q12114	Chitin biosynthesis protein CHS5 OS=Saccharomyces cerevisiae (strain ATCC 204508 / S288c) GN=CHS5 PE=1 SV=1	3	1	1	1	6	3	4	6.18571	4.45024	20.7219	8.83406	3.71602e-07	5.66325e-07	6.7702	0.952036	0.74182	0.74182	Total_CL - Total_NoCL	limma	3.71602e-07	5.66325e-07	TRUE	enriched hit	6.18571	TRUE	TRUE	FALSE
709	VBA4	Q04602	Vacuolar basic amino acid transporter 4 OS=Saccharomyces cerevisiae (strain ATCC 204508 / S288c) GN=VBA4 PE=1 SV=1	3	1	1	1	6	3	5	6.61149	2.14965	22.3525	8.82062	3.78553e-07	5.76106e-07	6.70094	0.952109	0.74182	0.74182	Total_CL - Total_NoCL	limma	3.78553e-07	5.76106e-07	TRUE	enriched hit	6.61149	FALSE	TRUE	TRUE
710	TAO3	P40468	Cell morphogenesis protein PAG1 OS=Saccharomyces cerevisiae (strain ATCC 204508 / S288c) GN=TAO3 PE=1 SV=1	2	1	1	NA	6	2	3	5.73284	3.05517	19.9592	8.80601	3.86266e-07	5.87016e-07	6.76007	0.952188	0.74182	0.74182	Total_CL - Total_NoCL	limma	3.86266e-07	5.87016e-07	TRUE	enriched hit	5.73284	FALSE	TRUE	TRUE
711	HXT3	P32466	Low-affinity glucose transporter HXT3 OS=Saccharomyces cerevisiae (strain ATCC 204508 / S288c) GN=HXT3 PE=1 SV=1	3	1	1	1	6	3	5	7.25205	2.37668	22.4562	8.79926	3.89888e-07	5.91686e-07	6.6705	0.952224	0.74182	0.74182	Total_CL - Total_NoCL	limma	3.89888e-07	5.91686e-07	TRUE	enriched hit	7.25205	FALSE	TRUE	TRUE
712	MCD4	P36051	GPI ethanolamine phosphate transferase 1 OS=Saccharomyces cerevisiae (strain ATCC 204508 / S288c) GN=MCD4 PE=1 SV=1	3	1	1	1	6	3	7	6.2527	2.17634	21.2711	8.78188	3.99376e-07	6.05234e-07	6.66059	0.952319	0.74182	0.74182	Total_CL - Total_NoCL	limma	3.99376e-07	6.05234e-07	TRUE	enriched hit	6.2527	FALSE	TRUE	TRUE
713	RPB2	P08518	DNA-directed RNA polymerase II subunit RPB2 OS=Saccharomyces cerevisiae (strain ATCC 204508 / S288c) GN=RPB2 PE=1 SV=2	3	1	1	1	6	3	14	6.46222	2.95254	23.1391	8.77405	4.03729e-07	6.10973e-07	6.63451	0.952361	0.74182	0.74182	Total_CL - Total_NoCL	limma	4.03729e-07	6.10973e-07	TRUE	enriched hit	6.46222	FALSE	TRUE	TRUE
714	DIP5	P53388	Dicarboxylic amino acid permease OS=Saccharomyces cerevisiae (strain ATCC 204508 / S288c) GN=DIP5 PE=1 SV=1	3	1	1	1	6	3	5	6.37263	1.98486	22.7386	8.75055	4.17095e-07	6.30316e-07	6.6009	0.952489	0.74182	0.74182	Total_CL - Total_NoCL	limma	4.17095e-07	6.30316e-07	TRUE	enriched hit	6.37263	FALSE	TRUE	TRUE
715	VID27	P40157	Vacuolar import and degradation protein 27 OS=Saccharomyces cerevisiae (strain ATCC 204508 / S288c) GN=VID27 PE=1 SV=1	3	1	1	1	6	3	13	6.14029	2.49777	22.1867	8.74813	4.18503e-07	6.31559e-07	6.59742	0.952502	0.74182	0.74182	Total_CL - Total_NoCL	limma	4.18503e-07	6.31559e-07	TRUE	enriched hit	6.14029	FALSE	TRUE	TRUE
716	HSC82	P15108	ATP-dependent molecular chaperone HSC82 OS=Saccharomyces cerevisiae (strain ATCC 204508 / S288c) GN=HSC82 PE=1 SV=4	3	1	1	1	6	3	6	6.90017	2.39691	22.9418	8.7308	4.28696e-07	6.46038e-07	6.57259	0.952596	0.74182	0.74182	Total_CL - Total_NoCL	limma	4.28696e-07	6.46038e-07	TRUE	enriched hit	6.90017	FALSE	TRUE	TRUE
717	AIP1	P46680	Actin-interacting protein 1 OS=Saccharomyces cerevisiae (strain ATCC 204508 / S288c) GN=AIP1 PE=1 SV=1	3	1	1	1	6	3	9	6.59023	2.6369	22.8755	8.72136	4.34364e-07	6.53666e-07	6.55904	0.952647	0.74182	0.74182	Total_CL - Total_NoCL	limma	4.34364e-07	6.53666e-07	TRUE	enriched hit	6.59023	FALSE	TRUE	TRUE
718	NAB6	Q03735	RNA-binding protein NAB6 OS=Saccharomyces cerevisiae (strain ATCC 204508 / S288c) GN=NAB6 PE=1 SV=1	3	1	1	1	6	3	12	6.38296	4.45669	21.6679	8.70326	4.45445e-07	6.69409e-07	6.65776	0.952745	0.74182	0.74182	Total_CL - Total_NoCL	limma	4.45445e-07	6.69409e-07	TRUE	enriched hit	6.38296	FALSE	TRUE	TRUE
719	TRM732	Q03496	tRNA (cytidine(32)-2'-O)-methyltransferase non-catalytic subunit TRM732 OS=Saccharomyces cerevisiae (strain ATCC 204508 / S288c) GN=TRM732 PE=1 SV=1	3	1	1	1	6	3	4	5.75798	3.08902	20.6222	8.69856	4.48372e-07	6.7287e-07	6.52628	0.952771	0.74182	0.74182	Total_CL - Total_NoCL	limma	4.48372e-07	6.7287e-07	TRUE	enriched hit	5.75798	FALSE	TRUE	TRUE
720	CYS4	P32582	Cystathionine beta-synthase OS=Saccharomyces cerevisiae (strain ATCC 204508 / S288c) GN=CYS4 PE=1 SV=1	3	1	1	1	6	3	9	6.40205	3.21104	22.6404	8.68057	4.59766e-07	6.89011e-07	6.50038	0.952868	0.74182	0.74182	Total_CL - Total_NoCL	limma	4.59766e-07	6.89011e-07	TRUE	enriched hit	6.40205	TRUE	TRUE	FALSE
721	PRC1	P00729	Carboxypeptidase Y OS=Saccharomyces cerevisiae (strain ATCC 204508 / S288c) GN=PRC1 PE=1 SV=1	3	1	1	1	6	3	3	6.28766	2.13216	21.5125	8.67688	4.62139e-07	6.91606e-07	6.49507	0.952888	0.74182	0.74182	Total_CL - Total_NoCL	limma	4.62139e-07	6.91606e-07	TRUE	enriched hit	6.28766	FALSE	TRUE	TRUE
722	DAP2	P18962	Dipeptidyl aminopeptidase B OS=Saccharomyces cerevisiae (strain ATCC 204508 / S288c) GN=DAP2 PE=1 SV=2	3	1	1	1	6	3	14	6.66255	2.03308	23.5614	8.66255	4.7148e-07	7.03435e-07	6.47442	0.952966	0.74182	0.74182	Total_CL - Total_NoCL	limma	4.7148e-07	7.03435e-07	TRUE	enriched hit	6.66255	TRUE	TRUE	FALSE
723	PYC2	P32327	Pyruvate carboxylase 2 OS=Saccharomyces cerevisiae (strain ATCC 204508 / S288c) GN=PYC2 PE=1 SV=2	3	1	1	1	6	3	4	6.20664	3.29247	20.7722	8.66197	4.71862e-07	7.03435e-07	6.47358	0.952969	0.74182	0.74182	Total_CL - Total_NoCL	limma	4.71862e-07	7.03435e-07	TRUE	enriched hit	6.20664	FALSE	TRUE	TRUE
724	IKI3	Q06706	Elongator complex protein 1 OS=Saccharomyces cerevisiae (strain ATCC 204508 / S288c) GN=IKI3 PE=1 SV=1	3	1	1	1	6	3	12	6.37427	2.47551	22.9886	8.66177	4.71999e-07	7.03435e-07	6.47328	0.95297	0.74182	0.74182	Total_CL - Total_NoCL	limma	4.71999e-07	7.03435e-07	TRUE	enriched hit	6.37427	FALSE	TRUE	TRUE
725	PMA1	P05030	Plasma membrane ATPase 1 OS=Saccharomyces cerevisiae (strain ATCC 204508 / S288c) GN=PMA1 PE=1 SV=2	3	1	1	1	6	3	36	8.83129	1.92611	26.4987	8.64225	4.85065e-07	7.2191e-07	6.4451	0.953076	0.74182	0.74182	Total_CL - Total_NoCL	limma	4.85065e-07	7.2191e-07	TRUE	enriched hit	8.83129	FALSE	TRUE	TRUE
726	SEC16	P48415	COPII coat assembly protein SEC16 OS=Saccharomyces cerevisiae (strain ATCC 204508 / S288c) GN=SEC16 PE=1 SV=2	3	1	1	1	6	3	12	6.05016	2.46961	22.384	8.63592	4.8938e-07	7.27329e-07	6.43596	0.95311	0.74182	0.74182	Total_CL - Total_NoCL	limma	4.8938e-07	7.27329e-07	TRUE	enriched hit	6.05016	FALSE	TRUE	TRUE
727	GDA1	P32621	Guanosine-diphosphatase OS=Saccharomyces cerevisiae (strain ATCC 204508 / S288c) GN=GDA1 PE=1 SV=1	3	1	1	1	6	3	7	6.57663	2.13965	22.5132	8.63205	4.92041e-07	7.30278e-07	6.43036	0.953131	0.74182	0.74182	Total_CL - Total_NoCL	limma	4.92041e-07	7.30278e-07	TRUE	enriched hit	6.57663	TRUE	TRUE	FALSE
728	STE13	P33894	Dipeptidyl aminopeptidase A OS=Saccharomyces cerevisiae (strain ATCC 204508 / S288c) GN=STE13 PE=1 SV=1	3	1	1	1	6	3	4	6.84744	2.1557	19.8552	8.62013	5.00335e-07	7.41568e-07	6.41311	0.953196	0.74182	0.74182	Total_CL - Total_NoCL	limma	5.00335e-07	7.41568e-07	TRUE	enriched hit	6.84744	FALSE	TRUE	TRUE
729	NPT1	P39683	Nicotinate phosphoribosyltransferase OS=Saccharomyces cerevisiae (strain ATCC 204508 / S288c) GN=NPT1 PE=1 SV=3	2	1	1	NA	5	2	3	5.65587	2.1914	21.2013	8.59173	5.20686e-07	7.70672e-07	6.53768	0.95335	0.74182	0.74182	Total_CL - Total_NoCL	limma	5.20686e-07	7.70672e-07	TRUE	enriched hit	5.65587	FALSE	TRUE	TRUE
730	HAS1	Q03532	ATP-dependent RNA helicase HAS1 OS=Saccharomyces cerevisiae (strain ATCC 204508 / S288c) GN=HAS1 PE=1 SV=1	3	1	1	1	6	3	6	6.10285	3.4409	21.2071	8.56905	5.37569e-07	7.94571e-07	6.33901	0.953473	0.74182	0.74182	Total_CL - Total_NoCL	limma	5.37569e-07	7.94571e-07	TRUE	enriched hit	6.10285	FALSE	TRUE	TRUE
731	ADE4	P04046	Amidophosphoribosyltransferase OS=Saccharomyces cerevisiae (strain ATCC 204508 / S288c) GN=ADE4 PE=1 SV=2	3	1	1	1	6	3	4	5.70908	4.03853	19.8712	8.56368	5.41653e-07	7.99513e-07	6.38865	0.953502	0.74182	0.74182	Total_CL - Total_NoCL	limma	5.41653e-07	7.99513e-07	TRUE	enriched hit	5.70908	FALSE	TRUE	TRUE
732	RPL4B	P49626	60S ribosomal protein L4-B OS=Saccharomyces cerevisiae (strain ATCC 204508 / S288c) GN=RPL4B PE=1 SV=2	2	NA	1	1	5	2	2	6.39586	5.74589	20.2249	8.54209	5.58395e-07	8.23099e-07	6.29411	0.953619	0.74182	0.74182	Total_CL - Total_NoCL	limma	5.58395e-07	8.23099e-07	TRUE	enriched hit	6.39586	FALSE	TRUE	TRUE
733	OST3	P48439	Dolichyl-diphosphooligosaccharide--protein glycosyltransferase subunit 3 OS=Saccharomyces cerevisiae (strain ATCC 204508 / S288c) GN=OST3 PE=1 SV=1	2	1	1	NA	6	2	3	5.94112	2.41894	21.5423	8.52097	5.75313e-07	8.46879e-07	6.3518	0.953734	0.74182	0.74182	Total_CL - Total_NoCL	limma	5.75313e-07	8.46879e-07	TRUE	enriched hit	5.94112	FALSE	TRUE	TRUE
734	ALG12	P53730	Dol-P-Man:Man(7)GlcNAc(2)-PP-Dol alpha-1,6-mannosyltransferase OS=Saccharomyces cerevisiae (strain ATCC 204508 / S288c) GN=ALG12 PE=1 SV=1	3	1	1	1	6	3	5	6.35625	2.06388	21.9096	8.51378	5.81188e-07	8.54362e-07	6.26239	0.953773	0.74182	0.74182	Total_CL - Total_NoCL	limma	5.81188e-07	8.54362e-07	TRUE	enriched hit	6.35625	FALSE	TRUE	TRUE
735	APE2	P32454	Aminopeptidase 2, mitochondrial OS=Saccharomyces cerevisiae (strain ATCC 204508 / S288c) GN=APE2 PE=1 SV=4	3	1	1	1	6	3	12	6.32758	3.06535	22.4979	8.49435	5.97402e-07	8.77002e-07	6.23006	0.953878	0.74182	0.74182	Total_CL - Total_NoCL	limma	5.97402e-07	8.77002e-07	TRUE	enriched hit	6.32758	FALSE	TRUE	TRUE
736	NMA111	P53920	Pro-apoptotic serine protease NMA111 OS=Saccharomyces cerevisiae (strain ATCC 204508 / S288c) GN=NMA111 PE=1 SV=1	3	1	1	1	6	3	12	6.37974	2.36911	22.8094	8.40608	6.77299e-07	9.92942e-07	6.10045	0.954357	0.74182	0.74182	Total_CL - Total_NoCL	limma	6.77299e-07	9.92942e-07	TRUE	enriched hit	6.37974	FALSE	TRUE	TRUE
737	NET1	P47035	Nucleolar protein NET1 OS=Saccharomyces cerevisiae (strain ATCC 204508 / S288c) GN=NET1 PE=1 SV=1	2	1	NA	1	6	2	8	6.72363	1.59561	23.4848	8.40439	6.78936e-07	9.93992e-07	6.18197	0.954366	0.74182	0.74182	Total_CL - Total_NoCL	limma	6.78936e-07	9.93992e-07	TRUE	enriched hit	6.72363	FALSE	TRUE	TRUE
738	YBR056W	P38081	Uncharacterized glycosyl hydrolase YBR056W OS=Saccharomyces cerevisiae (strain ATCC 204508 / S288c) GN=YBR056W PE=1 SV=1	3	1	1	1	6	3	4	5.93113	1.8581	21.2353	8.37701	7.06025e-07	1.03225e-06	6.06154	0.954515	0.74182	0.74182	Total_CL - Total_NoCL	limma	7.06025e-07	1.03225e-06	TRUE	enriched hit	5.93113	FALSE	TRUE	TRUE
739	YCK3	P39962	Casein kinase I homolog 3 OS=Saccharomyces cerevisiae (strain ATCC 204508 / S288c) GN=YCK3 PE=1 SV=2	3	1	1	1	6	3	10	6.73908	2.13743	22.593	8.37549	7.07563e-07	1.0331e-06	6.05929	0.954523	0.74182	0.74182	Total_CL - Total_NoCL	limma	7.07563e-07	1.0331e-06	TRUE	enriched hit	6.73908	FALSE	TRUE	TRUE
740	SUI2	P20459	Eukaryotic translation initiation factor 2 subunit alpha OS=Saccharomyces cerevisiae (strain ATCC 204508 / S288c) GN=SUI2 PE=1 SV=1	3	1	1	1	6	3	6	6.52593	3.05112	23.0215	8.35458	7.29074e-07	1.06307e-06	6.02438	0.954636	0.74182	0.74182	Total_CL - Total_NoCL	limma	7.29074e-07	1.06307e-06	TRUE	enriched hit	6.52593	TRUE	TRUE	FALSE
741	NAB2	P32505	Nuclear polyadenylated RNA-binding protein NAB2 OS=Saccharomyces cerevisiae (strain ATCC 204508 / S288c) GN=NAB2 PE=1 SV=1	2	NA	1	1	6	2	2	5.90458	4.40992	19.5055	8.35306	7.3066e-07	1.06394e-06	6.08358	0.954644	0.74182	0.74182	Total_CL - Total_NoCL	limma	7.3066e-07	1.06394e-06	TRUE	enriched hit	5.90458	FALSE	TRUE	TRUE
742	RPL32	P38061	60S ribosomal protein L32 OS=Saccharomyces cerevisiae (strain ATCC 204508 / S288c) GN=RPL32 PE=1 SV=1	3	1	1	1	6	3	5	7.6765	4.14967	23.0624	8.3267	7.58825e-07	1.10347e-06	5.98308	0.954787	0.74182	0.74182	Total_CL - Total_NoCL	limma	7.58825e-07	1.10347e-06	TRUE	enriched hit	7.6765	TRUE	TRUE	FALSE
743	SPT8	P38915	Transcription factor SPT8 OS=Saccharomyces cerevisiae (strain ATCC 204508 / S288c) GN=SPT8 PE=1 SV=1	3	1	1	1	6	3	4	6.87194	3.06925	21.2841	8.29977	7.88797e-07	1.14551e-06	5.95873	0.954933	0.74182	0.74182	Total_CL - Total_NoCL	limma	7.88797e-07	1.14551e-06	TRUE	enriched hit	6.87194	TRUE	TRUE	FALSE
744	TOP2	P06786	DNA topoisomerase 2 OS=Saccharomyces cerevisiae (strain ATCC 204508 / S288c) GN=TOP2 PE=1 SV=2	3	1	1	1	6	3	12	5.77585	2.46654	21.7184	8.28691	8.03547e-07	1.16536e-06	5.92393	0.955003	0.74182	0.74182	Total_CL - Total_NoCL	limma	8.03547e-07	1.16536e-06	TRUE	enriched hit	5.77585	FALSE	TRUE	TRUE
745	RNR2	P09938	Ribonucleoside-diphosphate reductase small chain 1 OS=Saccharomyces cerevisiae (strain ATCC 204508 / S288c) GN=RNR2 PE=1 SV=2	3	1	1	1	6	3	7	6.36724	2.99347	22.5269	8.27781	8.1415e-07	1.17915e-06	5.91039	0.955053	0.74182	0.74182	Total_CL - Total_NoCL	limma	8.1415e-07	1.17915e-06	TRUE	enriched hit	6.36724	FALSE	TRUE	TRUE
746	MRH1	Q12117	Protein MRH1 OS=Saccharomyces cerevisiae (strain ATCC 204508 / S288c) GN=MRH1 PE=1 SV=1	3	1	1	1	6	3	7	6.88999	2.24236	21.9183	8.24173	8.57716e-07	1.24058e-06	5.86058	0.955248	0.74182	0.74182	Total_CL - Total_NoCL	limma	8.57716e-07	1.24058e-06	TRUE	enriched hit	6.88999	FALSE	TRUE	TRUE
747	YOL057W	Q08225	Probable dipeptidyl peptidase 3 OS=Saccharomyces cerevisiae (strain ATCC 204508 / S288c) GN=YOL057W PE=1 SV=1	2	1	1	NA	6	2	2	5.64865	3.25273	20.4778	8.23524	8.65797e-07	1.2506e-06	6.07453	0.955283	0.74182	0.74182	Total_CL - Total_NoCL	limma	8.65797e-07	1.2506e-06	TRUE	enriched hit	5.64865	FALSE	TRUE	TRUE
748	SFB3	P38810	SED5-binding protein 3 OS=Saccharomyces cerevisiae (strain ATCC 204508 / S288c) GN=SFB3 PE=1 SV=1	3	1	1	1	6	3	4	6.05344	2.95591	21.0682	8.22986	8.72576e-07	1.2587e-06	5.83881	0.955313	0.74182	0.74182	Total_CL - Total_NoCL	limma	8.72576e-07	1.2587e-06	TRUE	enriched hit	6.05344	FALSE	TRUE	TRUE
749	PEX19	Q07418	Peroxisomal membrane protein import receptor PEX19 OS=Saccharomyces cerevisiae (strain ATCC 204508 / S288c) GN=PEX19 PE=1 SV=2	2	1	1	NA	6	2	3	5.62229	3.32412	20.2023	8.22168	8.82974e-07	1.272e-06	6.05479	0.955357	0.74182	0.74182	Total_CL - Total_NoCL	limma	8.82974e-07	1.272e-06	TRUE	enriched hit	5.62229	FALSE	TRUE	TRUE
750	TAT1	P38085	Valine/tyrosine/tryptophan amino-acid permease 1 OS=Saccharomyces cerevisiae (strain ATCC 204508 / S288c) GN=TAT1 PE=1 SV=1	3	1	1	1	6	3	5	6.49242	2.51949	21.5314	8.21291	8.94265e-07	1.28655e-06	5.82323	0.955405	0.74182	0.74182	Total_CL - Total_NoCL	limma	8.94265e-07	1.28655e-06	TRUE	enriched hit	6.49242	FALSE	TRUE	TRUE
751	SKI3	P17883	Superkiller protein 3 OS=Saccharomyces cerevisiae (strain ATCC 204508 / S288c) GN=SKI3 PE=1 SV=2	3	1	1	1	6	3	8	6.31826	2.40291	21.6206	8.20916	8.99148e-07	1.29185e-06	5.80782	0.955425	0.74182	0.74182	Total_CL - Total_NoCL	limma	8.99148e-07	1.29185e-06	TRUE	enriched hit	6.31826	FALSE	TRUE	TRUE
752	UTP22	P53254	U3 small nucleolar RNA-associated protein 22 OS=Saccharomyces cerevisiae (strain ATCC 204508 / S288c) GN=UTP22 PE=1 SV=1	3	1	1	1	6	3	5	5.7226	2.64262	20.6898	8.20473	9.04941e-07	1.29845e-06	5.80119	0.955449	0.74182	0.74182	Total_CL - Total_NoCL	limma	9.04941e-07	1.29845e-06	TRUE	enriched hit	5.7226	FALSE	TRUE	TRUE
753	RAX2	Q12465	Bud site selection protein RAX2 OS=Saccharomyces cerevisiae (strain ATCC 204508 / S288c) GN=RAX2 PE=1 SV=1	3	1	1	1	6	3	5	6.72359	2.20903	23.311	8.20133	9.09425e-07	1.30315e-06	5.79608	0.955467	0.74182	0.74182	Total_CL - Total_NoCL	limma	9.09425e-07	1.30315e-06	TRUE	enriched hit	6.72359	TRUE	TRUE	FALSE
754	DOP1	Q03921	Protein dopey OS=Saccharomyces cerevisiae (strain ATCC 204508 / S288c) GN=DOP1 PE=1 SV=1	2	1	1	NA	4	2	4	5.54361	3.55943	20.9167	8.18603	9.29857e-07	1.33066e-06	5.87975	0.95555	0.74182	0.74182	Total_CL - Total_NoCL	limma	9.29857e-07	1.33066e-06	TRUE	enriched hit	5.54361	TRUE	TRUE	FALSE
755	CHS1	P08004	Chitin synthase 1 OS=Saccharomyces cerevisiae (strain ATCC 204508 / S288c) GN=CHS1 PE=1 SV=2	3	1	1	1	6	3	4	5.94671	1.87772	20.8987	8.18394	9.32682e-07	1.33293e-06	5.79122	0.955562	0.74182	0.74182	Total_CL - Total_NoCL	limma	9.32682e-07	1.33293e-06	TRUE	enriched hit	5.94671	TRUE	TRUE	FALSE
756	SEC2	P17065	Rab guanine nucleotide exchange factor SEC2 OS=Saccharomyces cerevisiae (strain ATCC 204508 / S288c) GN=SEC2 PE=1 SV=1	3	1	1	1	6	3	6	6.205	2.6275	21.9826	8.17854	9.40031e-07	1.34166e-06	5.76189	0.955591	0.74182	0.74182	Total_CL - Total_NoCL	limma	9.40031e-07	1.34166e-06	TRUE	enriched hit	6.205	FALSE	TRUE	TRUE
757	MLC1	P53141	Myosin light chain 1 OS=Saccharomyces cerevisiae (strain ATCC 204508 / S288c) GN=MLC1 PE=1 SV=1	3	1	1	1	6	3	4	6.09644	3.44372	21.0356	8.15501	9.72783e-07	1.38657e-06	5.78683	0.955719	0.74182	0.74182	Total_CL - Total_NoCL	limma	9.72783e-07	1.38657e-06	TRUE	enriched hit	6.09644	TRUE	TRUE	FALSE
758	AKR1	P39010	Palmitoyltransferase AKR1 OS=Saccharomyces cerevisiae (strain ATCC 204508 / S288c) GN=AKR1 PE=1 SV=1	3	1	1	1	6	3	4	5.75926	2.3547	20.674	8.15082	9.78739e-07	1.39322e-06	5.72427	0.955741	0.74182	0.74182	Total_CL - Total_NoCL	limma	9.78739e-07	1.39322e-06	TRUE	enriched hit	5.75926	FALSE	TRUE	TRUE
759	ADE5	P07244	Bifunctional purine biosynthetic protein ADE5,7 OS=Saccharomyces cerevisiae (strain ATCC 204508 / S288c) GN=ADE5,7 PE=1 SV=1	3	1	1	1	6	3	13	6.62214	3.1238	22.7679	8.14849	9.82071e-07	1.39612e-06	5.71669	0.955754	0.74182	0.74182	Total_CL - Total_NoCL	limma	9.82071e-07	1.39612e-06	TRUE	enriched hit	6.62214	TRUE	TRUE	FALSE
760	TCB3	Q03640	Tricalbin-3 OS=Saccharomyces cerevisiae (strain ATCC 204508 / S288c) GN=TCB3 PE=1 SV=1	3	1	1	1	6	3	12	6.33994	3.0904	22.285	8.14168	9.91868e-07	1.40819e-06	5.70644	0.955791	0.74182	0.74182	Total_CL - Total_NoCL	limma	9.91868e-07	1.40819e-06	TRUE	enriched hit	6.33994	FALSE	TRUE	TRUE
761	CHO2	P05374	Phosphatidylethanolamine N-methyltransferase OS=Saccharomyces cerevisiae (strain ATCC 204508 / S288c) GN=CHO2 PE=1 SV=1	3	1	1	1	6	3	13	6.62264	2.47973	22.9889	8.13818	9.96952e-07	1.41355e-06	5.70116	0.95581	0.74182	0.74182	Total_CL - Total_NoCL	limma	9.96952e-07	1.41355e-06	TRUE	enriched hit	6.62264	FALSE	TRUE	TRUE
762	SEC63	P14906	Protein translocation protein SEC63 OS=Saccharomyces cerevisiae (strain ATCC 204508 / S288c) GN=SEC63 PE=1 SV=2	3	1	1	1	6	3	5	6.18754	2.3226	21.4826	8.12962	1.00949e-06	1.42945e-06	5.68825	0.955856	0.74182	0.74182	Total_CL - Total_NoCL	limma	1.00949e-06	1.42945e-06	TRUE	enriched hit	6.18754	FALSE	TRUE	TRUE
763	FRE1	P32791	Ferric/cupric reductase transmembrane component 1 OS=Saccharomyces cerevisiae (strain ATCC 204508 / S288c) GN=FRE1 PE=1 SV=1	3	1	1	1	6	3	3	6.05963	3.13229	21.6094	8.11268	1.03478e-06	1.46334e-06	5.66268	0.955948	0.74182	0.74182	Total_CL - Total_NoCL	limma	1.03478e-06	1.46334e-06	TRUE	enriched hit	6.05963	FALSE	TRUE	TRUE
764	GCN20	P43535	Protein GCN20 OS=Saccharomyces cerevisiae (strain ATCC 204508 / S288c) GN=GCN20 PE=1 SV=1	3	1	1	1	6	3	7	6.17411	3.02823	21.8498	8.09042	1.06904e-06	1.50982e-06	5.62903	0.956069	0.74182	0.74182	Total_CL - Total_NoCL	limma	1.06904e-06	1.50982e-06	TRUE	enriched hit	6.17411	FALSE	TRUE	TRUE
765	YPL260W	Q08977	UPF0662 protein YPL260W OS=Saccharomyces cerevisiae (strain ATCC 204508 / S288c) GN=YPL260W PE=1 SV=1	3	1	1	1	6	3	3	5.83935	2.24442	20.6546	8.08791	1.07298e-06	1.51339e-06	5.62523	0.956083	0.74182	0.74182	Total_CL - Total_NoCL	limma	1.07298e-06	1.51339e-06	TRUE	enriched hit	5.83935	FALSE	TRUE	TRUE
766	FKS1	P38631	1,3-beta-glucan synthase component FKS1 OS=Saccharomyces cerevisiae (strain ATCC 204508 / S288c) GN=FKS1 PE=1 SV=2	3	1	1	1	6	3	30	7.4682	2.39744	24.7497	8.07681	1.09059e-06	1.53487e-06	5.60841	0.956143	0.74182	0.74182	Total_CL - Total_NoCL	limma	1.09059e-06	1.53487e-06	TRUE	enriched hit	7.4682	FALSE	TRUE	TRUE
767	SEC61	P32915	Protein transport protein SEC61 OS=Saccharomyces cerevisiae (strain ATCC 204508 / S288c) GN=SEC61 PE=1 SV=1	3	1	1	1	6	3	5	6.06823	3.53422	21.1727	8.07652	1.09105e-06	1.53487e-06	5.60798	0.956144	0.74182	0.74182	Total_CL - Total_NoCL	limma	1.09105e-06	1.53487e-06	TRUE	enriched hit	6.06823	FALSE	TRUE	TRUE
768	VTC4	P47075	Vacuolar transporter chaperone 4 OS=Saccharomyces cerevisiae (strain ATCC 204508 / S288c) GN=VTC4 PE=1 SV=2	3	1	1	1	6	3	9	6.24732	2.41278	22.5407	8.05422	1.12735e-06	1.58387e-06	5.57416	0.956265	0.74182	0.74182	Total_CL - Total_NoCL	limma	1.12735e-06	1.58387e-06	TRUE	enriched hit	6.24732	FALSE	TRUE	TRUE
769	ALG6	Q12001	Dolichyl pyrophosphate Man9GlcNAc2 alpha-1,3-glucosyltransferase OS=Saccharomyces cerevisiae (strain ATCC 204508 / S288c) GN=ALG6 PE=1 SV=1	3	1	1	1	6	3	3	5.95879	1.88234	20.8115	8.04629	1.14056e-06	1.60034e-06	5.57693	0.956308	0.74182	0.74182	Total_CL - Total_NoCL	limma	1.14056e-06	1.60034e-06	TRUE	enriched hit	5.95879	FALSE	TRUE	TRUE
770	ARO8	P53090	Aromatic/aminoadipate aminotransferase 1 OS=Saccharomyces cerevisiae (strain ATCC 204508 / S288c) GN=ARO8 PE=1 SV=1	3	1	1	1	6	3	5	6.18599	3.04966	21.8041	8.03687	1.15647e-06	1.62056e-06	5.54781	0.95636	0.74182	0.74182	Total_CL - Total_NoCL	limma	1.15647e-06	1.62056e-06	TRUE	enriched hit	6.18599	FALSE	TRUE	TRUE
771	BDH1	P39714	(R,R)-butanediol dehydrogenase OS=Saccharomyces cerevisiae (strain ATCC 204508 / S288c) GN=BDH1 PE=1 SV=2	2	1	1	NA	6	2	2	5.8952	2.47921	20.7264	8.02107	1.1837e-06	1.65656e-06	5.6115	0.956445	0.74182	0.74182	Total_CL - Total_NoCL	limma	1.1837e-06	1.65656e-06	TRUE	enriched hit	5.8952	FALSE	TRUE	TRUE
772	VPS13	Q07878	Vacuolar protein sorting-associated protein 13 OS=Saccharomyces cerevisiae (strain ATCC 204508 / S288c) GN=VPS13 PE=1 SV=1	3	1	1	1	6	3	11	5.91014	2.34114	22.1822	8.00881	1.20528e-06	1.68458e-06	5.5051	0.956512	0.74182	0.74182	Total_CL - Total_NoCL	limma	1.20528e-06	1.68458e-06	TRUE	enriched hit	5.91014	FALSE	TRUE	TRUE
773	CPA2	P03965	Carbamoyl-phosphate synthase arginine-specific large chain OS=Saccharomyces cerevisiae (strain ATCC 204508 / S288c) GN=CPA2 PE=1 SV=1	3	1	1	1	6	3	5	5.73017	2.93017	20.2547	7.97265	1.2714e-06	1.77343e-06	5.66512	0.956708	0.74182	0.74182	Total_CL - Total_NoCL	limma	1.2714e-06	1.77343e-06	TRUE	enriched hit	5.73017	FALSE	TRUE	TRUE
774	CCT2	P39076	T-complex protein 1 subunit beta OS=Saccharomyces cerevisiae (strain ATCC 204508 / S288c) GN=CCT2 PE=1 SV=1	3	1	1	1	6	3	9	6.00577	3.12695	21.6751	7.97225	1.27214e-06	1.77343e-06	5.44932	0.95671	0.74182	0.74182	Total_CL - Total_NoCL	limma	1.27214e-06	1.77343e-06	TRUE	enriched hit	6.00577	TRUE	TRUE	FALSE
775	YLR413W	Q06689	Cell membrane protein YLR413W OS=Saccharomyces cerevisiae (strain ATCC 204508 / S288c) GN=YLR413W PE=1 SV=1	3	1	1	1	6	3	12	7.62803	2.20341	24.7437	7.9638	1.28815e-06	1.79343e-06	5.43639	0.956756	0.74182	0.74182	Total_CL - Total_NoCL	limma	1.28815e-06	1.79343e-06	TRUE	enriched hit	7.62803	TRUE	TRUE	FALSE
776	ERB1	Q04660	Ribosome biogenesis protein ERB1 OS=Saccharomyces cerevisiae (strain ATCC 204508 / S288c) GN=ERB1 PE=1 SV=1	3	1	1	1	6	3	8	6.14449	2.31958	21.9668	7.94999	1.31477e-06	1.82796e-06	5.41526	0.956831	0.74182	0.74182	Total_CL - Total_NoCL	limma	1.31477e-06	1.82796e-06	TRUE	enriched hit	6.14449	FALSE	TRUE	TRUE
777	SUB1	P54000	RNA polymerase II transcriptional coactivator SUB1 OS=Saccharomyces cerevisiae (strain ATCC 204508 / S288c) GN=SUB1 PE=1 SV=1	3	1	1	1	6	3	4	5.79123	3.56229	20.3212	7.94918	1.31634e-06	1.82796e-06	5.41817	0.956835	0.74182	0.74182	Total_CL - Total_NoCL	limma	1.31634e-06	1.82796e-06	TRUE	enriched hit	5.79123	FALSE	TRUE	TRUE
778	AAT2	P23542	Aspartate aminotransferase, cytoplasmic OS=Saccharomyces cerevisiae (strain ATCC 204508 / S288c) GN=AAT2 PE=1 SV=3	2	1	1	NA	6	2	3	5.99031	3.43992	20.5537	7.94634	1.3219e-06	1.83333e-06	5.64892	0.956851	0.74182	0.74182	Total_CL - Total_NoCL	limma	1.3219e-06	1.83333e-06	TRUE	enriched hit	5.99031	TRUE	TRUE	FALSE
779	MYO2	P19524	Myosin-2 OS=Saccharomyces cerevisiae (strain ATCC 204508 / S288c) GN=MYO2 PE=1 SV=1	3	1	1	1	6	3	6	5.9936	3.18966	21.081	7.91531	1.3842e-06	1.91727e-06	5.36208	0.957019	0.74182	0.74182	Total_CL - Total_NoCL	limma	1.3842e-06	1.91727e-06	TRUE	enriched hit	5.9936	FALSE	TRUE	TRUE
780	CCT6	P39079	T-complex protein 1 subunit zeta OS=Saccharomyces cerevisiae (strain ATCC 204508 / S288c) GN=CCT6 PE=1 SV=1	3	1	1	1	6	3	4	6.00822	3.52407	21.0165	7.8874	1.44288e-06	1.99599e-06	5.31917	0.95717	0.74182	0.74182	Total_CL - Total_NoCL	limma	1.44288e-06	1.99599e-06	TRUE	enriched hit	6.00822	FALSE	TRUE	TRUE
781	GET3	Q12154	ATPase GET3 OS=Saccharomyces cerevisiae (strain ATCC 204508 / S288c) GN=GET3 PE=1 SV=1	3	1	1	1	6	3	4	5.87112	3.6364	20.6618	7.88516	1.44772e-06	2.00012e-06	5.36614	0.957183	0.74182	0.74182	Total_CL - Total_NoCL	limma	1.44772e-06	2.00012e-06	TRUE	enriched hit	5.87112	FALSE	TRUE	TRUE
782	YGL140C	P53120	Uncharacterized membrane protein YGL140C OS=Saccharomyces cerevisiae (strain ATCC 204508 / S288c) GN=YGL140C PE=1 SV=1	3	1	1	1	6	3	5	5.92213	2.60268	20.8722	7.87801	1.46323e-06	2.01896e-06	5.3047	0.957221	0.74182	0.74182	Total_CL - Total_NoCL	limma	1.46323e-06	2.01896e-06	TRUE	enriched hit	5.92213	FALSE	TRUE	TRUE
783	EFG1	Q3E705	rRNA-processing protein EFG1 OS=Saccharomyces cerevisiae (strain ATCC 204508 / S288c) GN=EFG1 PE=1 SV=2	3	1	1	1	6	3	2	5.63133	4.47743	19.834	7.8636	1.49502e-06	2.06019e-06	5.50123	0.957299	0.74182	0.74182	Total_CL - Total_NoCL	limma	1.49502e-06	2.06019e-06	TRUE	enriched hit	5.63133	FALSE	TRUE	TRUE
784	LSP1	Q12230	Sphingolipid long chain base-responsive protein LSP1 OS=Saccharomyces cerevisiae (strain ATCC 204508 / S288c) GN=LSP1 PE=1 SV=1	2	1	1	NA	6	2	4	6.13087	1.77778	21.142	7.86207	1.49842e-06	2.06224e-06	5.36936	0.957308	0.74182	0.74182	Total_CL - Total_NoCL	limma	1.49842e-06	2.06224e-06	TRUE	enriched hit	6.13087	FALSE	TRUE	TRUE
785	PFF1	P38244	Vacuolar membrane protease OS=Saccharomyces cerevisiae (strain ATCC 204508 / S288c) GN=PFF1 PE=1 SV=3	3	1	1	1	6	3	20	7.31457	1.93359	24.9895	7.85058	1.52438e-06	2.09529e-06	5.26239	0.95737	0.74182	0.74182	Total_CL - Total_NoCL	limma	1.52438e-06	2.09529e-06	TRUE	enriched hit	7.31457	FALSE	TRUE	TRUE
786	KTR6	P54070	Mannosyltransferase KTR6 OS=Saccharomyces cerevisiae (strain ATCC 204508 / S288c) GN=KTR6 PE=1 SV=1	3	1	1	1	6	3	10	7.11899	1.9502	23.8985	7.83794	1.55345e-06	2.13253e-06	5.24287	0.957439	0.74182	0.74182	Total_CL - Total_NoCL	limma	1.55345e-06	2.13253e-06	TRUE	enriched hit	7.11899	TRUE	TRUE	FALSE
787	SMB1	P40018	Small nuclear ribonucleoprotein-associated protein B OS=Saccharomyces cerevisiae (strain ATCC 204508 / S288c) GN=SMB1 PE=1 SV=1	3	1	1	1	6	3	3	5.83616	4.33637	20.2797	7.82485	1.58418e-06	2.17196e-06	5.27335	0.95751	0.74182	0.74182	Total_CL - Total_NoCL	limma	1.58418e-06	2.17196e-06	TRUE	enriched hit	5.83616	TRUE	TRUE	FALSE
788	AGP1	P25376	General amino acid permease AGP1 OS=Saccharomyces cerevisiae (strain ATCC 204508 / S288c) GN=AGP1 PE=1 SV=3	3	1	1	1	6	3	2	5.80654	2.50209	19.0272	7.81403	1.61006e-06	2.20464e-06	5.22101	0.957568	0.74182	0.74182	Total_CL - Total_NoCL	limma	1.61006e-06	2.20464e-06	TRUE	enriched hit	5.80654	FALSE	TRUE	TRUE
789	DUG1	P43616	Cys-Gly metallodipeptidase DUG1 OS=Saccharomyces cerevisiae (strain ATCC 204508 / S288c) GN=DUG1 PE=1 SV=1	3	1	1	1	6	3	8	6.14068	2.94421	22.0539	7.79836	1.64835e-06	2.25201e-06	5.18159	0.957653	0.74182	0.74182	Total_CL - Total_NoCL	limma	1.64835e-06	2.25201e-06	TRUE	enriched hit	6.14068	TRUE	TRUE	FALSE
790	MNN5	P46982	Alpha-1,2-mannosyltransferase MNN5 OS=Saccharomyces cerevisiae (strain ATCC 204508 / S288c) GN=MNN5 PE=1 SV=2	3	1	1	1	6	3	6	6.55774	2.52948	23.0989	7.79792	1.64944e-06	2.25201e-06	5.1809	0.957656	0.74182	0.74182	Total_CL - Total_NoCL	limma	1.64944e-06	2.25201e-06	TRUE	enriched hit	6.55774	TRUE	TRUE	FALSE
791	SED4	P25365	Putative guanine nucleotide-exchange factor SED4 OS=Saccharomyces cerevisiae (strain ATCC 204508 / S288c) GN=SED4 PE=1 SV=1	3	1	1	1	6	3	4	6.02975	2.26238	20.4431	7.79732	1.65091e-06	2.25201e-06	5.18418	0.957659	0.74182	0.74182	Total_CL - Total_NoCL	limma	1.65091e-06	2.25201e-06	TRUE	enriched hit	6.02975	FALSE	TRUE	TRUE
792	POL1	P13382	DNA polymerase alpha catalytic subunit A OS=Saccharomyces cerevisiae (strain ATCC 204508 / S288c) GN=POL1 PE=1 SV=2	3	1	1	1	6	3	8	5.78378	2.7057	20.7833	7.76393	1.73588e-06	2.36492e-06	5.12812	0.95784	0.74182	0.74182	Total_CL - Total_NoCL	limma	1.73588e-06	2.36492e-06	TRUE	enriched hit	5.78378	FALSE	TRUE	TRUE
793	SCW10	Q04951	Probable family 17 glucosidase SCW10 OS=Saccharomyces cerevisiae (strain ATCC 204508 / S288c) GN=SCW10 PE=1 SV=1	2	1	NA	1	6	2	3	6.15836	2.30927	21.4116	7.7468	1.78125e-06	2.42366e-06	5.19174	0.957933	0.74182	0.74182	Total_CL - Total_NoCL	limma	1.78125e-06	2.42366e-06	TRUE	enriched hit	6.15836	FALSE	TRUE	TRUE
794	SEC7	P11075	Protein transport protein SEC7 OS=Saccharomyces cerevisiae (strain ATCC 204508 / S288c) GN=SEC7 PE=1 SV=2	3	1	1	1	6	3	40	7.26628	2.24015	25.4607	7.74502	1.78603e-06	2.42712e-06	5.09868	0.957943	0.74182	0.74182	Total_CL - Total_NoCL	limma	1.78603e-06	2.42712e-06	TRUE	enriched hit	7.26628	FALSE	TRUE	TRUE
795	FET4	P40988	Low-affinity Fe(2+) transport protein OS=Saccharomyces cerevisiae (strain ATCC 204508 / S288c) GN=FET4 PE=1 SV=2	3	1	1	1	6	3	4	6.03097	2.2598	21.3207	7.74161	1.79522e-06	2.43362e-06	5.09338	0.957961	0.74182	0.74182	Total_CL - Total_NoCL	limma	1.79522e-06	2.43362e-06	TRUE	enriched hit	6.03097	FALSE	TRUE	TRUE
796	EDE1	P34216	EH domain-containing and endocytosis protein 1 OS=Saccharomyces cerevisiae (strain ATCC 204508 / S288c) GN=EDE1 PE=1 SV=2	3	1	1	1	6	3	16	6.30499	2.5905	22.9669	7.74157	1.79533e-06	2.43362e-06	5.09332	0.957961	0.74182	0.74182	Total_CL - Total_NoCL	limma	1.79533e-06	2.43362e-06	TRUE	enriched hit	6.30499	TRUE	TRUE	FALSE
797	TRX2	P22803	Thioredoxin-2 OS=Saccharomyces cerevisiae (strain ATCC 204508 / S288c) GN=TRX2 PE=1 SV=3	2	1	NA	1	6	2	2	5.9424	3.54203	20.6839	7.6856	1.95379e-06	2.64509e-06	5.24303	0.958265	0.74182	0.74182	Total_CL - Total_NoCL	limma	1.95379e-06	2.64509e-06	TRUE	enriched hit	5.9424	TRUE	TRUE	FALSE
798	RVS167	P39743	Reduced viability upon starvation protein 167 OS=Saccharomyces cerevisiae (strain ATCC 204508 / S288c) GN=RVS167 PE=1 SV=1	3	1	1	1	6	3	4	5.80916	3.33146	20.3756	7.66182	2.02554e-06	2.73879e-06	4.96862	0.958394	0.74182	0.74182	Total_CL - Total_NoCL	limma	2.02554e-06	2.73879e-06	TRUE	enriched hit	5.80916	TRUE	TRUE	FALSE
799	PRE3	P38624	Proteasome subunit beta type-1 OS=Saccharomyces cerevisiae (strain ATCC 204508 / S288c) GN=PRE3 PE=1 SV=2	3	1	1	1	6	3	2	5.89449	2.96109	20.0001	7.65341	2.05156e-06	2.77051e-06	5.00943	0.95844	0.74182	0.74182	Total_CL - Total_NoCL	limma	2.05156e-06	2.77051e-06	TRUE	enriched hit	5.89449	FALSE	TRUE	TRUE
800	PLB1	P39105	Lysophospholipase 1 OS=Saccharomyces cerevisiae (strain ATCC 204508 / S288c) GN=PLB1 PE=1 SV=2	3	1	1	1	6	3	8	7.05273	1.54962	23.7541	7.63492	2.11003e-06	2.84591e-06	4.92638	0.95854	0.74182	0.74182	Total_CL - Total_NoCL	limma	2.11003e-06	2.84591e-06	TRUE	enriched hit	7.05273	TRUE	TRUE	FALSE
801	TOM1	Q03280	E3 ubiquitin-protein ligase TOM1 OS=Saccharomyces cerevisiae (strain ATCC 204508 / S288c) GN=TOM1 PE=1 SV=1	3	1	1	1	6	3	22	6.42296	2.06848	22.8947	7.62205	2.15176e-06	2.89856e-06	4.90614	0.95861	0.74182	0.74182	Total_CL - Total_NoCL	limma	2.15176e-06	2.89856e-06	TRUE	enriched hit	6.42296	FALSE	TRUE	TRUE
802	SMF3	Q12078	Iron transporter SMF3 OS=Saccharomyces cerevisiae (strain ATCC 204508 / S288c) GN=SMF3 PE=1 SV=1	3	1	1	1	6	3	3	6.25441	1.80427	20.7703	7.61893	2.16203e-06	2.90877e-06	4.92358	0.958627	0.74182	0.74182	Total_CL - Total_NoCL	limma	2.16203e-06	2.90877e-06	TRUE	enriched hit	6.25441	TRUE	TRUE	FALSE
803	VCX1	Q99385	Vacuolar calcium ion transporter OS=Saccharomyces cerevisiae (strain ATCC 204508 / S288c) GN=VCX1 PE=1 SV=1	3	1	1	1	6	3	5	6.52875	2.1598	21.9527	7.61077	2.18907e-06	2.94147e-06	4.90946	0.958671	0.74182	0.74182	Total_CL - Total_NoCL	limma	2.18907e-06	2.94147e-06	TRUE	enriched hit	6.52875	FALSE	TRUE	TRUE
804	ENP2	P48234	Ribosome biogenesis protein ENP2 OS=Saccharomyces cerevisiae (strain ATCC 204508 / S288c) GN=ENP2 PE=1 SV=2	3	1	1	1	6	3	4	6.08023	2.87283	22.0146	7.60962	2.19293e-06	2.943e-06	4.88655	0.958677	0.74182	0.74182	Total_CL - Total_NoCL	limma	2.19293e-06	2.943e-06	TRUE	enriched hit	6.08023	FALSE	TRUE	TRUE
805	ABP1	P15891	Actin-binding protein OS=Saccharomyces cerevisiae (strain ATCC 204508 / S288c) GN=ABP1 PE=1 SV=4	3	1	1	1	6	3	13	6.48947	2.38426	23.4727	7.59708	2.23524e-06	2.99606e-06	4.8668	0.958745	0.74182	0.74182	Total_CL - Total_NoCL	limma	2.23524e-06	2.99606e-06	TRUE	enriched hit	6.48947	FALSE	TRUE	TRUE
806	NOC3	Q07896	Nucleolar complex-associated protein 3 OS=Saccharomyces cerevisiae (strain ATCC 204508 / S288c) GN=NOC3 PE=1 SV=1	3	1	1	1	6	3	5	5.96357	2.92032	21.3306	7.5614	2.36053e-06	3.16006e-06	4.81043	0.958939	0.74182	0.74182	Total_CL - Total_NoCL	limma	2.36053e-06	3.16006e-06	TRUE	enriched hit	5.96357	FALSE	TRUE	TRUE
807	CHS3	P29465	Chitin synthase 3 OS=Saccharomyces cerevisiae (strain ATCC 204508 / S288c) GN=CHS3 PE=1 SV=3	3	1	1	1	6	3	11	6.11847	2.54099	21.6749	7.5548	2.38447e-06	3.18816e-06	4.80428	0.958975	0.74182	0.74182	Total_CL - Total_NoCL	limma	2.38447e-06	3.18816e-06	TRUE	enriched hit	6.11847	FALSE	TRUE	TRUE
808	BPT1	P14772	Bile pigment transporter 1 OS=Saccharomyces cerevisiae (strain ATCC 204508 / S288c) GN=BPT1 PE=1 SV=2	3	1	1	1	6	3	7	5.98747	2.52754	21.7547	7.54181	2.43242e-06	3.24825e-06	4.77942	0.959045	0.74182	0.74182	Total_CL - Total_NoCL	limma	2.43242e-06	3.24825e-06	TRUE	enriched hit	5.98747	FALSE	TRUE	TRUE
809	ARO1	P08566	Pentafunctional AROM polypeptide OS=Saccharomyces cerevisiae (strain ATCC 204508 / S288c) GN=ARO1 PE=1 SV=1	3	1	1	1	6	3	18	6.34074	3.10844	22.3152	7.51208	2.54601e-06	3.39572e-06	4.73224	0.959207	0.74182	0.74182	Total_CL - Total_NoCL	limma	2.54601e-06	3.39572e-06	TRUE	enriched hit	6.34074	FALSE	TRUE	TRUE
810	JIP5	Q06214	WD repeat-containing protein JIP5 OS=Saccharomyces cerevisiae (strain ATCC 204508 / S288c) GN=JIP5 PE=1 SV=2	2	1	1	NA	6	2	4	5.90616	2.12433	21.4292	7.4684	2.72309e-06	3.62743e-06	4.75555	0.959444	0.74182	0.74182	Total_CL - Total_NoCL	limma	2.72309e-06	3.62743e-06	TRUE	enriched hit	5.90616	FALSE	TRUE	TRUE
811	PUP1	P25043	Proteasome subunit beta type-2 OS=Saccharomyces cerevisiae (strain ATCC 204508 / S288c) GN=PUP1 PE=1 SV=1	2	NA	1	1	6	2	2	5.94092	3.43549	19.9989	7.41974	2.93578e-06	3.90593e-06	4.84553	0.959708	0.74182	0.74182	Total_CL - Total_NoCL	limma	2.93578e-06	3.90593e-06	TRUE	enriched hit	5.94092	TRUE	TRUE	FALSE
812	RLI1	Q03195	Translation initiation factor RLI1 OS=Saccharomyces cerevisiae (strain ATCC 204508 / S288c) GN=RLI1 PE=1 SV=1	3	1	1	1	6	3	11	6.46756	3.42596	22.7243	7.4188	2.94007e-06	3.90682e-06	4.58349	0.959713	0.74182	0.74182	Total_CL - Total_NoCL	limma	2.94007e-06	3.90682e-06	TRUE	enriched hit	6.46756	TRUE	TRUE	FALSE
813	IZH2	Q12442	ADIPOR-like receptor IZH2 OS=Saccharomyces cerevisiae (strain ATCC 204508 / S288c) GN=IZH2 PE=1 SV=2	2	1	1	NA	5	2	2	6.33333	2.11188	20.3578	7.38818	3.08302e-06	4.09173e-06	4.64904	0.959879	0.74182	0.74182	Total_CL - Total_NoCL	limma	3.08302e-06	4.09173e-06	TRUE	enriched hit	6.33333	FALSE	TRUE	TRUE
814	PIL1	P53252	Sphingolipid long chain base-responsive protein PIL1 OS=Saccharomyces cerevisiae (strain ATCC 204508 / S288c) GN=PIL1 PE=1 SV=1	3	1	1	1	6	3	2	6.31255	2.81338	20.2645	7.35805	3.2309e-06	4.28273e-06	4.50304	0.960042	0.74182	0.74182	Total_CL - Total_NoCL	limma	3.2309e-06	4.28273e-06	TRUE	enriched hit	6.31255	TRUE	TRUE	FALSE
815	NOP2	P40991	25S rRNA (cytosine(2870)-C(5))-methyltransferase OS=Saccharomyces cerevisiae (strain ATCC 204508 / S288c) GN=NOP2 PE=1 SV=1	3	1	1	1	6	3	5	6.24253	2.88979	21.6603	7.34512	3.29663e-06	4.36449e-06	4.46517	0.960112	0.74182	0.74182	Total_CL - Total_NoCL	limma	3.29663e-06	4.36449e-06	TRUE	enriched hit	6.24253	FALSE	TRUE	TRUE
816	UBP10	P53874	Ubiquitin carboxyl-terminal hydrolase 10 OS=Saccharomyces cerevisiae (strain ATCC 204508 / S288c) GN=UBP10 PE=1 SV=2	3	1	1	1	6	3	5	5.83308	2.83238	21.0975	7.33785	3.3342e-06	4.40882e-06	4.45346	0.960152	0.74182	0.74182	Total_CL - Total_NoCL	limma	3.3342e-06	4.40882e-06	TRUE	enriched hit	5.83308	FALSE	TRUE	TRUE
817	FTR1	P40088	Plasma membrane iron permease OS=Saccharomyces cerevisiae (strain ATCC 204508 / S288c) GN=FTR1 PE=1 SV=1	3	1	1	1	6	3	4	6.24754	2.37196	20.4425	7.31805	3.4388e-06	4.54157e-06	4.4259	0.960259	0.74182	0.74182	Total_CL - Total_NoCL	limma	3.4388e-06	4.54157e-06	TRUE	enriched hit	6.24754	FALSE	TRUE	TRUE
818	CRH1	P53301	Probable glycosidase CRH1 OS=Saccharomyces cerevisiae (strain ATCC 204508 / S288c) GN=CRH1 PE=1 SV=1	3	1	1	1	6	3	8	7.61966	1.57901	24.2052	7.30622	3.503e-06	4.61779e-06	4.40241	0.960324	0.74182	0.74182	Total_CL - Total_NoCL	limma	3.503e-06	4.61779e-06	TRUE	enriched hit	7.61966	TRUE	TRUE	FALSE
819	DNF2	Q12675	Phospholipid-transporting ATPase DNF2 OS=Saccharomyces cerevisiae (strain ATCC 204508 / S288c) GN=DNF2 PE=1 SV=1	3	1	1	1	6	3	9	5.9181	2.396	21.8428	7.30584	3.50507e-06	4.61779e-06	4.4018	0.960326	0.74182	0.74182	Total_CL - Total_NoCL	limma	3.50507e-06	4.61779e-06	TRUE	enriched hit	5.9181	FALSE	TRUE	TRUE
820	DFM1	Q12743	DER1-like family member protein 1 OS=Saccharomyces cerevisiae (strain ATCC 204508 / S288c) GN=DFM1 PE=1 SV=1	2	1	NA	1	6	2	2	5.85522	1.55796	20.1249	7.25925	3.77046e-06	4.96137e-06	4.42941	0.960578	0.74182	0.74182	Total_CL - Total_NoCL	limma	3.77046e-06	4.96137e-06	TRUE	enriched hit	5.85522	FALSE	TRUE	TRUE
821	NAT10	P53914	RNA cytidine acetyltransferase OS=Saccharomyces cerevisiae (strain ATCC 204508 / S288c) GN=NAT10 PE=1 SV=1	3	1	1	1	6	3	6	6.14629	2.49276	21.9704	7.24931	3.82976e-06	5.03326e-06	4.31023	0.960632	0.74182	0.74182	Total_CL - Total_NoCL	limma	3.82976e-06	5.03326e-06	TRUE	enriched hit	6.14629	FALSE	TRUE	TRUE
822	PMT4	P46971	Dolichyl-phosphate-mannose--protein mannosyltransferase 4 OS=Saccharomyces cerevisiae (strain ATCC 204508 / S288c) GN=PMT4 PE=1 SV=1	3	1	1	1	6	3	8	6.63453	2.47907	22.6516	7.24208	3.87352e-06	5.08458e-06	4.29849	0.960672	0.74182	0.74182	Total_CL - Total_NoCL	limma	3.87352e-06	5.08458e-06	TRUE	enriched hit	6.63453	FALSE	TRUE	TRUE
823	FCY2	P17064	Purine-cytosine permease FCY2 OS=Saccharomyces cerevisiae (strain ATCC 204508 / S288c) GN=FCY2 PE=1 SV=2	3	1	1	1	6	3	5	6.31037	2.28346	21.5483	7.23473	3.91852e-06	5.13741e-06	4.29094	0.960711	0.74182	0.74182	Total_CL - Total_NoCL	limma	3.91852e-06	5.13741e-06	TRUE	enriched hit	6.31037	FALSE	TRUE	TRUE
824	RPA190	P10964	DNA-directed RNA polymerase I subunit RPA190 OS=Saccharomyces cerevisiae (strain ATCC 204508 / S288c) GN=RPA190 PE=1 SV=2	3	1	1	1	6	3	34	6.7328	2.25113	24.4234	7.19932	4.14326e-06	5.42546e-06	4.2289	0.960904	0.74182	0.74182	Total_CL - Total_NoCL	limma	4.14326e-06	5.42546e-06	TRUE	enriched hit	6.7328	FALSE	TRUE	TRUE
825	VMA10	P48836	V-type proton ATPase subunit G OS=Saccharomyces cerevisiae (strain ATCC 204508 / S288c) GN=VMA10 PE=1 SV=1	2	1	1	NA	6	2	3	6.29937	2.36234	20.5522	7.16959	4.34246e-06	5.67941e-06	4.28427	0.961065	0.74182	0.74182	Total_CL - Total_NoCL	limma	4.34246e-06	5.67941e-06	TRUE	enriched hit	6.29937	TRUE	TRUE	FALSE
826	TSC13	Q99190	Very-long-chain enoyl-CoA reductase OS=Saccharomyces cerevisiae (strain ATCC 204508 / S288c) GN=TSC13 PE=1 SV=1	2	1	NA	1	6	2	3	6.36624	1.9746	22.7989	7.14075	4.54538e-06	5.93761e-06	4.22882	0.961221	0.74182	0.74182	Total_CL - Total_NoCL	limma	4.54538e-06	5.93761e-06	TRUE	enriched hit	6.36624	FALSE	TRUE	TRUE
827	NFU1	P32860	NifU-like protein, mitochondrial OS=Saccharomyces cerevisiae (strain ATCC 204508 / S288c) GN=NFU1 PE=1 SV=2	3	1	1	1	6	3	3	5.86245	2.40528	20.822	7.13547	4.58353e-06	5.9802e-06	4.12452	0.96125	0.74182	0.74182	Total_CL - Total_NoCL	limma	4.58353e-06	5.9802e-06	TRUE	enriched hit	5.86245	FALSE	TRUE	TRUE
828	MRP21	P38175	37S ribosomal protein MRP21, mitochondrial OS=Saccharomyces cerevisiae (strain ATCC 204508 / S288c) GN=MRP21 PE=1 SV=1	3	1	1	1	6	3	4	6.48011	3.04103	22.5812	7.11442	4.73932e-06	6.176e-06	4.08998	0.961364	0.74182	0.74182	Total_CL - Total_NoCL	limma	4.73932e-06	6.176e-06	TRUE	enriched hit	6.48011	TRUE	TRUE	FALSE
829	HSP82	P02829	ATP-dependent molecular chaperone HSP82 OS=Saccharomyces cerevisiae (strain ATCC 204508 / S288c) GN=HSP82 PE=1 SV=1	3	1	1	1	6	3	6	6.68663	2.37305	22.785	7.10875	4.78216e-06	6.2243e-06	4.08068	0.961395	0.74182	0.74182	Total_CL - Total_NoCL	limma	4.78216e-06	6.2243e-06	TRUE	enriched hit	6.68663	FALSE	TRUE	TRUE
830	RPN1	P38764	26S proteasome regulatory subunit RPN1 OS=Saccharomyces cerevisiae (strain ATCC 204508 / S288c) GN=RPN1 PE=1 SV=3	3	1	1	1	6	3	11	6.38394	2.06999	22.9961	7.06753	5.10652e-06	6.63848e-06	4.01285	0.961619	0.74182	0.74182	Total_CL - Total_NoCL	limma	5.10652e-06	6.63848e-06	TRUE	enriched hit	6.38394	FALSE	TRUE	TRUE
831	STT3	P39007	Dolichyl-diphosphooligosaccharide--protein glycosyltransferase subunit STT3 OS=Saccharomyces cerevisiae (strain ATCC 204508 / S288c) GN=STT3 PE=1 SV=2	3	1	1	1	6	3	11	7.09607	2.20839	23.0872	7.05775	5.18687e-06	6.73482e-06	3.99671	0.961672	0.74182	0.74182	Total_CL - Total_NoCL	limma	5.18687e-06	6.73482e-06	TRUE	enriched hit	7.09607	FALSE	TRUE	TRUE
832	SEC26	P41810	Coatomer subunit beta OS=Saccharomyces cerevisiae (strain ATCC 204508 / S288c) GN=SEC26 PE=1 SV=2	3	1	1	1	6	3	12	6.43016	2.86291	21.5905	7.05376	5.21998e-06	6.76967e-06	3.99459	0.961693	0.74182	0.74182	Total_CL - Total_NoCL	limma	5.21998e-06	6.76967e-06	TRUE	enriched hit	6.43016	FALSE	TRUE	TRUE
833	CDC1	P40986	Cell division control protein 1 OS=Saccharomyces cerevisiae (strain ATCC 204508 / S288c) GN=CDC1 PE=1 SV=2	3	1	1	1	6	3	8	6.51199	1.79717	23.1777	7.03512	5.37783e-06	6.96601e-06	3.95934	0.961795	0.74182	0.74182	Total_CL - Total_NoCL	limma	5.37783e-06	6.96601e-06	TRUE	enriched hit	6.51199	FALSE	TRUE	TRUE
834	BAP3	P41815	Valine amino-acid permease OS=Saccharomyces cerevisiae (strain ATCC 204508 / S288c) GN=BAP3 PE=1 SV=2	3	1	1	1	6	3	3	5.99727	2.10428	21.0151	6.98175	5.85802e-06	7.5789e-06	3.88855	0.962084	0.74182	0.74182	Total_CL - Total_NoCL	limma	5.85802e-06	7.5789e-06	TRUE	enriched hit	5.99727	FALSE	TRUE	TRUE
835	POL5	P39985	DNA polymerase V OS=Saccharomyces cerevisiae (strain ATCC 204508 / S288c) GN=POL5 PE=1 SV=1	3	1	1	1	6	3	8	6.40831	2.62563	22.2235	6.98005	5.87406e-06	7.59055e-06	3.86813	0.962093	0.74182	0.74182	Total_CL - Total_NoCL	limma	5.87406e-06	7.59055e-06	TRUE	enriched hit	6.40831	FALSE	TRUE	TRUE
836	FPR3	P38911	FK506-binding nuclear protein OS=Saccharomyces cerevisiae (strain ATCC 204508 / S288c) GN=FPR3 PE=1 SV=2	2	1	1	NA	6	2	5	6.89243	1.90893	22.9398	6.97161	5.95433e-06	7.68507e-06	3.95119	0.962139	0.74182	0.74182	Total_CL - Total_NoCL	limma	5.95433e-06	7.68507e-06	TRUE	enriched hit	6.89243	FALSE	TRUE	TRUE
837	ROT2	P38138	Glucosidase 2 subunit alpha OS=Saccharomyces cerevisiae (strain ATCC 204508 / S288c) GN=ROT2 PE=1 SV=1	3	1	1	1	6	3	6	6.21669	1.81074	21.9026	6.92648	6.40325e-06	8.25461e-06	3.77898	0.962384	0.74182	0.74182	Total_CL - Total_NoCL	limma	6.40325e-06	8.25461e-06	TRUE	enriched hit	6.21669	FALSE	TRUE	TRUE
838	YGR117C	P53270	Uncharacterized protein YGR117C OS=Saccharomyces cerevisiae (strain ATCC 204508 / S288c) GN=YGR117C PE=1 SV=1	2	1	1	NA	5	2	3	5.46232	3.21027	20.9436	6.91429	6.53049e-06	8.40859e-06	4.05593	0.96245	0.74182	0.74182	Total_CL - Total_NoCL	limma	6.53049e-06	8.40859e-06	TRUE	enriched hit	5.46232	FALSE	TRUE	TRUE
839	VTC2	P43585	Vacuolar transporter chaperone 2 OS=Saccharomyces cerevisiae (strain ATCC 204508 / S288c) GN=VTC2 PE=1 SV=1	2	1	NA	1	6	2	3	5.69107	1.92207	20.8832	6.89357	6.75293e-06	8.68464e-06	3.82177	0.962563	0.74182	0.74182	Total_CL - Total_NoCL	limma	6.75293e-06	8.68464e-06	TRUE	enriched hit	5.69107	FALSE	TRUE	TRUE
840	ECM16	Q04217	Probable ATP-dependent RNA helicase DHR1 OS=Saccharomyces cerevisiae (strain ATCC 204508 / S288c) GN=ECM16 PE=1 SV=1	3	1	1	1	6	3	9	6.13645	2.78578	21.6332	6.88887	6.80453e-06	8.74058e-06	3.72069	0.962588	0.74182	0.74182	Total_CL - Total_NoCL	limma	6.80453e-06	8.74058e-06	TRUE	enriched hit	6.13645	FALSE	TRUE	TRUE
841	RPS15	Q01855	40S ribosomal protein S15 OS=Saccharomyces cerevisiae (strain ATCC 204508 / S288c) GN=RPS15 PE=1 SV=1	2	NA	1	1	6	2	4	7.37477	5.39276	22.3858	6.88581	6.8383e-06	8.77351e-06	4.07501	0.962605	0.74182	0.74182	Total_CL - Total_NoCL	limma	6.8383e-06	8.77351e-06	TRUE	enriched hit	7.37477	FALSE	TRUE	TRUE
842	SUC2	P00724|P00724-2	Invertase 2 OS=Saccharomyces cerevisiae (strain ATCC 204508 / S288c) GN=SUC2 PE=1 SV=1|Isoform Intracellular of Invertase 2 OS=Saccharomyces cerevisiae (strain ATCC 204508 / S288c) GN=SUC2	3	1	1	1	6	3	5	6.62873	1.88997	23.5548	6.85133	7.23153e-06	9.267e-06	3.65328	0.962792	0.74182	0.74182	Total_CL - Total_NoCL	limma	7.23153e-06	9.267e-06	TRUE	enriched hit	6.62873	TRUE	TRUE	FALSE
843	RPN2	P32565	26S proteasome regulatory subunit RPN2 OS=Saccharomyces cerevisiae (strain ATCC 204508 / S288c) GN=RPN2 PE=1 SV=4	3	1	1	1	6	3	7	5.92653	1.92292	21.9867	6.83819	7.38754e-06	9.4557e-06	3.63122	0.962863	0.74182	0.74182	Total_CL - Total_NoCL	limma	7.38754e-06	9.4557e-06	TRUE	enriched hit	5.92653	FALSE	TRUE	TRUE
844	APL6	P46682	AP-3 complex subunit beta OS=Saccharomyces cerevisiae (strain ATCC 204508 / S288c) GN=APL6 PE=1 SV=2	3	1	1	1	6	3	8	5.89759	3.09615	21.2163	6.81838	7.6295e-06	9.75383e-06	3.59792	0.962971	0.74182	0.74182	Total_CL - Total_NoCL	limma	7.6295e-06	9.75383e-06	TRUE	enriched hit	5.89759	FALSE	TRUE	TRUE
845	MCM4	P30665	DNA replication licensing factor MCM4 OS=Saccharomyces cerevisiae (strain ATCC 204508 / S288c) GN=MCM4 PE=1 SV=2	3	1	1	1	6	3	4	5.68559	2.80012	20.4243	6.79868	7.87838e-06	1.00601e-05	3.56475	0.963078	0.74182	0.74182	Total_CL - Total_NoCL	limma	7.87838e-06	1.00601e-05	TRUE	enriched hit	5.68559	FALSE	TRUE	TRUE
846	RSM18	P40033	37S ribosomal protein RSM18, mitochondrial OS=Saccharomyces cerevisiae (strain ATCC 204508 / S288c) GN=RSM18 PE=1 SV=2	3	1	1	1	6	3	2	6.37773	5.68009	20.8825	6.79358	7.94419e-06	1.01321e-05	3.55616	0.963105	0.74182	0.74182	Total_CL - Total_NoCL	limma	7.94419e-06	1.01321e-05	TRUE	enriched hit	6.37773	TRUE	TRUE	FALSE
847	REG1	Q00816	Resistance to glucose repression protein 1 OS=Saccharomyces cerevisiae (strain ATCC 204508 / S288c) GN=REG1 PE=1 SV=1	3	1	1	1	6	3	6	6.10169	2.15796	22.3195	6.78363	8.07426e-06	1.02859e-05	3.53938	0.963159	0.74182	0.74182	Total_CL - Total_NoCL	limma	8.07426e-06	1.02859e-05	TRUE	enriched hit	6.10169	FALSE	TRUE	TRUE
848	DCP2	P53550	m7GpppN-mRNA hydrolase OS=Saccharomyces cerevisiae (strain ATCC 204508 / S288c) GN=DCP2 PE=1 SV=1	2	NA	1	1	6	2	2	5.64602	3.59794	19.6099	6.77349	8.20923e-06	1.04455e-05	3.89463	0.963214	0.74182	0.74182	Total_CL - Total_NoCL	limma	8.20923e-06	1.04455e-05	TRUE	enriched hit	5.64602	FALSE	TRUE	TRUE
849	ERG9	P29704	Squalene synthase OS=Saccharomyces cerevisiae (strain ATCC 204508 / S288c) GN=ERG9 PE=1 SV=2	2	NA	1	1	6	2	3	6.04699	3.28764	20.47	6.76159	8.37048e-06	1.06256e-05	3.88851	0.963279	0.74182	0.74182	Total_CL - Total_NoCL	limma	8.37048e-06	1.06256e-05	TRUE	enriched hit	6.04699	FALSE	TRUE	TRUE
850	SCW4	P53334	Probable family 17 glucosidase SCW4 OS=Saccharomyces cerevisiae (strain ATCC 204508 / S288c) GN=SCW4 PE=1 SV=1	3	1	1	1	6	3	4	6.19085	2.09187	22.1264	6.76159	8.37048e-06	1.06256e-05	3.50215	0.963279	0.74182	0.74182	Total_CL - Total_NoCL	limma	8.37048e-06	1.06256e-05	TRUE	enriched hit	6.19085	TRUE	TRUE	FALSE
851	ALG2	P43636	Alpha-1,3/1,6-mannosyltransferase ALG2 OS=Saccharomyces cerevisiae (strain ATCC 204508 / S288c) GN=ALG2 PE=1 SV=2	3	1	1	1	6	3	3	5.88547	2.489	20.4034	6.74985	8.5329e-06	1.0819e-05	3.48686	0.963343	0.74182	0.74182	Total_CL - Total_NoCL	limma	8.5329e-06	1.0819e-05	TRUE	enriched hit	5.88547	FALSE	TRUE	TRUE
852	GGA2	P38817	ADP-ribosylation factor-binding protein GGA2 OS=Saccharomyces cerevisiae (strain ATCC 204508 / S288c) GN=GGA2 PE=1 SV=1	2	NA	1	1	6	2	2	5.75093	3.16284	19.9859	6.74871	8.54876e-06	1.08264e-05	3.86913	0.963349	0.74182	0.74182	Total_CL - Total_NoCL	limma	8.54876e-06	1.08264e-05	TRUE	enriched hit	5.75093	FALSE	TRUE	TRUE
853	IST2	P38250	Increased sodium tolerance protein 2 OS=Saccharomyces cerevisiae (strain ATCC 204508 / S288c) GN=IST2 PE=1 SV=2	3	1	1	1	6	3	15	6.78271	2.32882	23.5357	6.74314	8.6272e-06	1.09129e-05	3.47094	0.963379	0.74182	0.74182	Total_CL - Total_NoCL	limma	8.6272e-06	1.09129e-05	TRUE	enriched hit	6.78271	FALSE	TRUE	TRUE
854	ERG11	P10614	Lanosterol 14-alpha demethylase OS=Saccharomyces cerevisiae (strain ATCC 204508 / S288c) GN=ERG11 PE=1 SV=1	3	1	1	1	6	3	5	5.94449	3.62392	20.6422	6.73849	8.69311e-06	1.09834e-05	3.46308	0.963404	0.74182	0.74182	Total_CL - Total_NoCL	limma	8.69311e-06	1.09834e-05	TRUE	enriched hit	5.94449	FALSE	TRUE	TRUE
855	LOC1	P43586	60S ribosomal subunit assembly/export protein LOC1 OS=Saccharomyces cerevisiae (strain ATCC 204508 / S288c) GN=LOC1 PE=1 SV=1	2	NA	1	1	6	2	2	5.90038	4.78269	19.3606	6.73513	8.74115e-06	1.10312e-05	3.84753	0.963423	0.74182	0.74182	Total_CL - Total_NoCL	limma	8.74115e-06	1.10312e-05	TRUE	enriched hit	5.90038	FALSE	TRUE	TRUE
856	RIO1	Q12196	Serine/threonine-protein kinase RIO1 OS=Saccharomyces cerevisiae (strain ATCC 204508 / S288c) GN=RIO1 PE=1 SV=1	3	1	1	1	6	3	3	5.70129	2.83101	20.7229	6.70345	9.20783e-06	1.16066e-05	3.40365	0.963595	0.74182	0.74182	Total_CL - Total_NoCL	limma	9.20783e-06	1.16066e-05	TRUE	enriched hit	5.70129	FALSE	TRUE	TRUE
857	TPM1	P17536	Tropomyosin-1 OS=Saccharomyces cerevisiae (strain ATCC 204508 / S288c) GN=TPM1 PE=1 SV=1	3	1	1	1	6	3	25	8.04524	3.04954	25.0601	6.68898	9.42951e-06	1.18722e-05	3.37907	0.963673	0.74182	0.74182	Total_CL - Total_NoCL	limma	9.42951e-06	1.18722e-05	TRUE	enriched hit	8.04524	FALSE	TRUE	TRUE
858	PMI40	P29952	Mannose-6-phosphate isomerase OS=Saccharomyces cerevisiae (strain ATCC 204508 / S288c) GN=PMI40 PE=1 SV=4	2	NA	1	1	6	2	3	5.8109	3.41768	20.2924	6.68061	9.56039e-06	1.20229e-05	3.76512	0.963718	0.74182	0.74182	Total_CL - Total_NoCL	limma	9.56039e-06	1.20229e-05	TRUE	enriched hit	5.8109	FALSE	TRUE	TRUE
859	ADE13	Q05911	Adenylosuccinate lyase OS=Saccharomyces cerevisiae (strain ATCC 204508 / S288c) GN=ADE13 PE=1 SV=1	3	1	1	1	6	3	6	5.92412	3.24158	20.7533	6.67969	9.57498e-06	1.20272e-05	3.36326	0.963723	0.74182	0.74182	Total_CL - Total_NoCL	limma	9.57498e-06	1.20272e-05	TRUE	enriched hit	5.92412	TRUE	TRUE	FALSE
860	SSF1	P38789	Ribosome biogenesis protein SSF1 OS=Saccharomyces cerevisiae (strain ATCC 204508 / S288c) GN=SSF1 PE=1 SV=1	3	1	1	1	6	3	5	6.47534	2.83471	22.2697	6.66366	9.83129e-06	1.23348e-05	3.33597	0.96381	0.74182	0.74182	Total_CL - Total_NoCL	limma	9.83129e-06	1.23348e-05	TRUE	enriched hit	6.47534	FALSE	TRUE	TRUE
861	OXP1	P28273	5-oxoprolinase OS=Saccharomyces cerevisiae (strain ATCC 204508 / S288c) GN=OXP1 PE=1 SV=2	3	1	1	1	6	3	8	5.86592	3.41808	20.7478	6.62039	1.05599e-05	1.32336e-05	3.26212	0.964045	0.74182	0.74182	Total_CL - Total_NoCL	limma	1.05599e-05	1.32336e-05	TRUE	enriched hit	5.86592	FALSE	TRUE	TRUE
862	TUF1	P02992	Elongation factor Tu, mitochondrial OS=Saccharomyces cerevisiae (strain ATCC 204508 / S288c) GN=TUF1 PE=1 SV=1	3	1	1	1	6	3	6	6.50564	2.39603	22.3909	6.57088	1.14635e-05	1.43493e-05	3.17731	0.964314	0.74182	0.74182	Total_CL - Total_NoCL	limma	1.14635e-05	1.43493e-05	TRUE	enriched hit	6.50564	FALSE	TRUE	TRUE
863	GAS3	Q03655	Probable 1,3-beta-glucanosyltransferase GAS3 OS=Saccharomyces cerevisiae (strain ATCC 204508 / S288c) GN=GAS3 PE=1 SV=1	3	1	1	1	6	3	11	7.71686	1.73462	24.4378	6.53315	1.22066e-05	1.52618e-05	3.11244	0.964519	0.74182	0.74182	Total_CL - Total_NoCL	limma	1.22066e-05	1.52618e-05	TRUE	enriched hit	7.71686	TRUE	TRUE	FALSE
864	TOP1	P04786	DNA topoisomerase 1 OS=Saccharomyces cerevisiae (strain ATCC 204508 / S288c) GN=TOP1 PE=1 SV=2	3	1	1	1	6	3	15	6.43672	2.34285	23.6449	6.52817	1.23083e-05	1.53711e-05	3.10387	0.964546	0.74182	0.74182	Total_CL - Total_NoCL	limma	1.23083e-05	1.53711e-05	TRUE	enriched hit	6.43672	FALSE	TRUE	TRUE
865	MSC7	P38694	Putative aldehyde dehydrogenase-like protein YHR039C OS=Saccharomyces cerevisiae (strain ATCC 204508 / S288c) GN=MSC7 PE=1 SV=1	2	1	1	NA	4	2	2	5.57824	2.79297	21.0025	6.51349	1.26135e-05	1.5734e-05	3.30571	0.964625	0.74182	0.74182	Total_CL - Total_NoCL	limma	1.26135e-05	1.5734e-05	TRUE	enriched hit	5.57824	FALSE	TRUE	TRUE
866	SSM4	P40318	ERAD-associated E3 ubiquitin-protein ligase DOA10 OS=Saccharomyces cerevisiae (strain ATCC 204508 / S288c) GN=SSM4 PE=1 SV=1	3	1	1	1	6	3	12	6.54366	1.79807	21.9908	6.49438	1.30228e-05	1.62259e-05	3.0456	0.964729	0.74182	0.74182	Total_CL - Total_NoCL	limma	1.30228e-05	1.62259e-05	TRUE	enriched hit	6.54366	FALSE	TRUE	TRUE
867	PMT7	Q06644	Probable dolichyl-phosphate-mannose--protein mannosyltransferase 7 OS=Saccharomyces cerevisiae (strain ATCC 204508 / S288c) GN=PMT7 PE=1 SV=1	3	1	1	1	6	3	3	6.18194	2.2094	20.9116	6.4885	1.31517e-05	1.63675e-05	3.04007	0.964761	0.74182	0.74182	Total_CL - Total_NoCL	limma	1.31517e-05	1.63675e-05	TRUE	enriched hit	6.18194	FALSE	TRUE	TRUE
868	CUE5	Q08412	Ubiquitin-binding protein CUE5 OS=Saccharomyces cerevisiae (strain ATCC 204508 / S288c) GN=CUE5 PE=1 SV=1	2	1	1	NA	6	2	4	6.16308	1.7382	21.798	6.47607	1.34281e-05	1.66924e-05	3.12504	0.964829	0.74182	0.74182	Total_CL - Total_NoCL	limma	1.34281e-05	1.66924e-05	TRUE	enriched hit	6.16308	FALSE	TRUE	TRUE
869	BLM10	P43583	Proteasome activator BLM10 OS=Saccharomyces cerevisiae (strain ATCC 204508 / S288c) GN=BLM10 PE=1 SV=2	3	1	1	1	6	3	8	5.80542	2.12115	21.135	6.46055	1.3782e-05	1.71126e-05	2.99173	0.964913	0.74182	0.74182	Total_CL - Total_NoCL	limma	1.3782e-05	1.71126e-05	TRUE	enriched hit	5.80542	FALSE	TRUE	TRUE
870	BBC1	P47068	Myosin tail region-interacting protein MTI1 OS=Saccharomyces cerevisiae (strain ATCC 204508 / S288c) GN=BBC1 PE=1 SV=2	2	1	1	NA	6	2	9	6.05849	2.64036	22.3211	6.43984	1.42694e-05	1.76973e-05	3.05256	0.965025	0.74182	0.74182	Total_CL - Total_NoCL	limma	1.42694e-05	1.76973e-05	TRUE	enriched hit	6.05849	FALSE	TRUE	TRUE
871	MKC7	P53379	Aspartic proteinase MKC7 OS=Saccharomyces cerevisiae (strain ATCC 204508 / S288c) GN=MKC7 PE=1 SV=2	3	1	1	1	6	3	5	6.5215	2.07846	22.5326	6.43871	1.42967e-05	1.77109e-05	2.94922	0.965031	0.74182	0.74182	Total_CL - Total_NoCL	limma	1.42967e-05	1.77109e-05	TRUE	enriched hit	6.5215	TRUE	TRUE	FALSE
872	COX1	P00401	Cytochrome c oxidase subunit 1 OS=Saccharomyces cerevisiae (strain ATCC 204508 / S288c) GN=COX1 PE=3 SV=2	2	1	1	NA	6	2	2	6.30512	1.87647	20.6174	6.40388	1.51593e-05	1.8758e-05	2.99953	0.96522	0.74182	0.74182	Total_CL - Total_NoCL	limma	1.51593e-05	1.8758e-05	TRUE	enriched hit	6.30512	FALSE	TRUE	TRUE
873	RPT4	P53549	26S protease subunit RPT4 OS=Saccharomyces cerevisiae (strain ATCC 204508 / S288c) GN=RPT4 PE=1 SV=4	2	1	1	NA	6	2	3	5.79331	1.97354	20.4344	6.39358	1.54249e-05	1.90647e-05	2.97252	0.965276	0.74182	0.74182	Total_CL - Total_NoCL	limma	1.54249e-05	1.90647e-05	TRUE	enriched hit	5.79331	FALSE	TRUE	TRUE
874	NOC2	P39744	Nucleolar complex protein 2 OS=Saccharomyces cerevisiae (strain ATCC 204508 / S288c) GN=NOC2 PE=1 SV=2	3	1	1	1	6	3	4	6.28816	2.25262	21.8553	6.38363	1.56859e-05	1.93651e-05	2.85348	0.96533	0.74182	0.74182	Total_CL - Total_NoCL	limma	1.56859e-05	1.93651e-05	TRUE	enriched hit	6.28816	FALSE	TRUE	TRUE
875	SSH1	P38353	Sec sixty-one protein homolog OS=Saccharomyces cerevisiae (strain ATCC 204508 / S288c) GN=SSH1 PE=1 SV=1	3	1	1	1	6	3	7	7.32952	2.30394	23.3317	6.37802	1.58352e-05	1.95128e-05	2.8437	0.965361	0.74182	0.74182	Total_CL - Total_NoCL	limma	1.58352e-05	1.95128e-05	TRUE	enriched hit	7.32952	FALSE	TRUE	TRUE
876	ALO1	P54783	D-arabinono-1,4-lactone oxidase OS=Saccharomyces cerevisiae (strain ATCC 204508 / S288c) GN=ALO1 PE=1 SV=1	2	NA	1	1	6	2	4	5.87863	3.17428	20.2407	6.37778	1.58417e-05	1.95128e-05	3.29088	0.965362	0.74182	0.74182	Total_CL - Total_NoCL	limma	1.58417e-05	1.95128e-05	TRUE	enriched hit	5.87863	FALSE	TRUE	TRUE
877	KRI1	P42846	Protein KRI1 OS=Saccharomyces cerevisiae (strain ATCC 204508 / S288c) GN=KRI1 PE=1 SV=1	3	1	1	1	6	3	7	5.90987	1.59967	22.0484	6.35138	1.65646e-05	2.038e-05	2.79721	0.965505	0.74182	0.74182	Total_CL - Total_NoCL	limma	1.65646e-05	2.038e-05	TRUE	enriched hit	5.90987	FALSE	TRUE	TRUE
878	FET3	P38993	Iron transport multicopper oxidase FET3 OS=Saccharomyces cerevisiae (strain ATCC 204508 / S288c) GN=FET3 PE=1 SV=2	3	1	1	1	6	3	6	6.68079	2.3781	22.2888	6.33582	1.70069e-05	2.09002e-05	2.77001	0.96559	0.74182	0.74182	Total_CL - Total_NoCL	limma	1.70069e-05	2.09002e-05	TRUE	enriched hit	6.68079	TRUE	TRUE	FALSE
879	ECM29	P38737	Proteasome component ECM29 OS=Saccharomyces cerevisiae (strain ATCC 204508 / S288c) GN=ECM29 PE=1 SV=1	3	1	1	1	6	3	11	5.9077	2.30926	22.2984	6.31895	1.75004e-05	2.14822e-05	2.74049	0.965681	0.74182	0.74182	Total_CL - Total_NoCL	limma	1.75004e-05	2.14822e-05	TRUE	enriched hit	5.9077	FALSE	TRUE	TRUE
880	HMG1	P12683	3-hydroxy-3-methylglutaryl-coenzyme A reductase 1 OS=Saccharomyces cerevisiae (strain ATCC 204508 / S288c) GN=HMG1 PE=1 SV=1	3	1	1	1	6	3	7	6.48908	2.87609	21.7882	6.28912	1.84099e-05	2.2573e-05	2.68819	0.965843	0.74182	0.74182	Total_CL - Total_NoCL	limma	1.84099e-05	2.2573e-05	TRUE	enriched hit	6.48908	FALSE	TRUE	TRUE
881	RPA43	P46669	DNA-directed RNA polymerase I subunit RPA43 OS=Saccharomyces cerevisiae (strain ATCC 204508 / S288c) GN=RPA43 PE=1 SV=2	3	1	1	1	6	3	5	6.1672	2.01833	21.9716	6.27428	1.88806e-05	2.31239e-05	2.66213	0.965924	0.74182	0.74182	Total_CL - Total_NoCL	limma	1.88806e-05	2.31239e-05	TRUE	enriched hit	6.1672	TRUE	TRUE	FALSE
882	ACT1	P60010	Actin OS=Saccharomyces cerevisiae (strain ATCC 204508 / S288c) GN=ACT1 PE=1 SV=1	3	1	1	1	6	3	7	6.88861	2.37042	22.8462	6.19999	2.14347e-05	2.62223e-05	2.5312	0.966327	0.74182	0.74182	Total_CL - Total_NoCL	limma	2.14347e-05	2.62223e-05	TRUE	enriched hit	6.88861	FALSE	TRUE	TRUE
883	FHL1	P39521	Pre-rRNA-processing protein FHL1 OS=Saccharomyces cerevisiae (strain ATCC 204508 / S288c) GN=FHL1 PE=1 SV=1	2	1	NA	1	6	2	4	6.1871	2.38003	22.7868	6.19305	2.16913e-05	2.65061e-05	2.62216	0.966365	0.74182	0.74182	Total_CL - Total_NoCL	limma	2.16913e-05	2.65061e-05	TRUE	enriched hit	6.1871	FALSE	TRUE	TRUE
884	GPA1	P08539	Guanine nucleotide-binding protein alpha-1 subunit OS=Saccharomyces cerevisiae (strain ATCC 204508 / S288c) GN=GPA1 PE=1 SV=3	2	NA	1	1	6	2	2	6.43511	3.45612	19.769	6.128	2.42565e-05	2.96072e-05	2.9035	0.966718	0.74182	0.74182	Total_CL - Total_NoCL	limma	2.42565e-05	2.96072e-05	TRUE	enriched hit	6.43511	FALSE	TRUE	TRUE
885	ITR1	P30605	Myo-inositol transporter 1 OS=Saccharomyces cerevisiae (strain ATCC 204508 / S288c) GN=ITR1 PE=1 SV=2	3	1	1	1	6	3	4	6.36419	2.30811	21.3858	6.07107	2.67628e-05	3.26294e-05	2.30218	0.967027	0.74182	0.74182	Total_CL - Total_NoCL	limma	2.67628e-05	3.26294e-05	TRUE	enriched hit	6.36419	FALSE	TRUE	TRUE
886	SNQ2	P32568	Protein SNQ2 OS=Saccharomyces cerevisiae (strain ATCC 204508 / S288c) GN=SNQ2 PE=1 SV=2	3	1	1	1	6	3	22	6.74464	2.03635	24.1009	6.04866	2.78222e-05	3.38828e-05	2.26214	0.967148	0.74182	0.74182	Total_CL - Total_NoCL	limma	2.78222e-05	3.38828e-05	TRUE	enriched hit	6.74464	FALSE	TRUE	TRUE
887	REI1	P38344	Cytoplasmic 60S subunit biogenesis factor REI1 OS=Saccharomyces cerevisiae (strain ATCC 204508 / S288c) GN=REI1 PE=1 SV=3	2	NA	1	1	6	2	2	5.99655	3.96281	20.0617	6.0445	2.80237e-05	3.40897e-05	2.76888	0.967171	0.74182	0.74182	Total_CL - Total_NoCL	limma	2.80237e-05	3.40897e-05	TRUE	enriched hit	5.99655	FALSE	TRUE	TRUE
888	TVP18	Q04767	Golgi apparatus membrane protein TVP18 OS=Saccharomyces cerevisiae (strain ATCC 204508 / S288c) GN=TVP18 PE=1 SV=1	3	1	1	1	6	3	2	7.11497	2.01217	21.0083	6.02365	2.90567e-05	3.53065e-05	2.22215	0.967284	0.74182	0.74182	Total_CL - Total_NoCL	limma	2.90567e-05	3.53065e-05	TRUE	enriched hit	7.11497	FALSE	TRUE	TRUE
889	SVF1	Q05515	Survival factor 1 OS=Saccharomyces cerevisiae (strain ATCC 204508 / S288c) GN=SVF1 PE=1 SV=1	3	1	1	1	6	3	9	6.90516	1.85851	23.5082	6.01883	2.9301e-05	3.55633e-05	2.20874	0.96731	0.74182	0.74182	Total_CL - Total_NoCL	limma	2.9301e-05	3.55633e-05	TRUE	enriched hit	6.90516	FALSE	TRUE	TRUE
890	TUB1	P09733	Tubulin alpha-1 chain OS=Saccharomyces cerevisiae (strain ATCC 204508 / S288c) GN=TUB1 PE=1 SV=2	2	NA	1	1	6	2	3	5.66866	3.32765	19.3698	6.01545	2.94733e-05	3.57322e-05	2.72181	0.967329	0.74182	0.74182	Total_CL - Total_NoCL	limma	2.94733e-05	3.57322e-05	TRUE	enriched hit	5.66866	TRUE	TRUE	FALSE
891	TOM22	P49334	Mitochondrial import receptor subunit TOM22 OS=Saccharomyces cerevisiae (strain ATCC 204508 / S288c) GN=TOM22 PE=1 SV=3	2	1	NA	1	6	2	2	5.81088	1.67892	20.5821	5.99541	3.05194e-05	3.6959e-05	2.27142	0.967438	0.74182	0.74182	Total_CL - Total_NoCL	limma	3.05194e-05	3.6959e-05	TRUE	enriched hit	5.81088	TRUE	TRUE	FALSE
892	MDN1	Q12019	Midasin OS=Saccharomyces cerevisiae (strain ATCC 204508 / S288c) GN=MDN1 PE=1 SV=1	3	1	1	1	6	3	71	7.06662	2.25827	26.0984	5.95898	3.2521e-05	3.93387e-05	2.10124	0.967635	0.74182	0.74182	Total_CL - Total_NoCL	limma	3.2521e-05	3.93387e-05	TRUE	enriched hit	7.06662	TRUE	TRUE	FALSE
893	YOP1	Q12402	Protein YOP1 OS=Saccharomyces cerevisiae (strain ATCC 204508 / S288c) GN=YOP1 PE=1 SV=3	3	1	1	1	6	3	3	6.59565	2.26041	21.2321	5.91924	3.48623e-05	4.21236e-05	2.02958	0.967851	0.74182	0.74182	Total_CL - Total_NoCL	limma	3.48623e-05	4.21236e-05	TRUE	enriched hit	6.59565	FALSE	TRUE	TRUE
894	FLC3	P53121	Putative flavin carrier protein 3 OS=Saccharomyces cerevisiae (strain ATCC 204508 / S288c) GN=FLC3 PE=1 SV=1	3	1	1	1	6	3	4	6.12297	2.34248	21.8586	5.90941	3.54681e-05	4.28077e-05	2.01182	0.967904	0.74182	0.74182	Total_CL - Total_NoCL	limma	3.54681e-05	4.28077e-05	TRUE	enriched hit	6.12297	FALSE	TRUE	TRUE
895	CAR2	P07991	Ornithine aminotransferase OS=Saccharomyces cerevisiae (strain ATCC 204508 / S288c) GN=CAR2 PE=1 SV=2	3	1	1	1	6	3	7	5.98317	2.32659	20.7505	5.89209	3.65623e-05	4.4079e-05	1.99218	0.967998	0.74182	0.74182	Total_CL - Total_NoCL	limma	3.65623e-05	4.4079e-05	TRUE	enriched hit	5.98317	TRUE	TRUE	FALSE
896	MLP1	Q02455	Protein MLP1 OS=Saccharomyces cerevisiae (strain ATCC 204508 / S288c) GN=MLP1 PE=1 SV=2	3	1	1	1	6	3	12	5.9025	2.53934	21.62	5.86138	3.85903e-05	4.64721e-05	1.92487	0.968165	0.74182	0.74182	Total_CL - Total_NoCL	limma	3.85903e-05	4.64721e-05	TRUE	enriched hit	5.9025	FALSE	TRUE	TRUE
897	EXG2	P52911	Glucan 1,3-beta-glucosidase 2 OS=Saccharomyces cerevisiae (strain ATCC 204508 / S288c) GN=EXG2 PE=1 SV=1	3	1	1	1	6	3	6	6.68966	1.88076	22.8229	5.85922	3.8737e-05	4.65967e-05	1.92096	0.968177	0.74182	0.74182	Total_CL - Total_NoCL	limma	3.8737e-05	4.65967e-05	TRUE	enriched hit	6.68966	TRUE	TRUE	FALSE
898	GSC2	P40989	1,3-beta-glucan synthase component GSC2 OS=Saccharomyces cerevisiae (strain ATCC 204508 / S288c) GN=GSC2 PE=1 SV=2	2	1	1	NA	6	2	2	5.76002	2.1059	19.8989	5.82124	4.14193e-05	4.97677e-05	1.9579	0.968383	0.74182	0.74182	Total_CL - Total_NoCL	limma	4.14193e-05	4.97677e-05	TRUE	enriched hit	5.76002	FALSE	TRUE	TRUE
899	YJL171C	P46992	Cell wall protein YJL171C OS=Saccharomyces cerevisiae (strain ATCC 204508 / S288c) GN=YJL171C PE=1 SV=2	3	1	1	1	6	3	7	6.22101	1.67764	22.3804	5.80985	4.2261e-05	5.07226e-05	1.83125	0.968445	0.74182	0.74182	Total_CL - Total_NoCL	limma	4.2261e-05	5.07226e-05	TRUE	enriched hit	6.22101	TRUE	TRUE	FALSE
900	SEC65	P29478	Signal recognition particle subunit SEC65 OS=Saccharomyces cerevisiae (strain ATCC 204508 / S288c) GN=SEC65 PE=1 SV=1	3	1	1	1	6	3	5	5.80514	4.00811	20.7926	5.80506	4.26207e-05	5.10975e-05	1.99102	0.968471	0.74182	0.74182	Total_CL - Total_NoCL	limma	4.26207e-05	5.10975e-05	TRUE	enriched hit	5.80514	FALSE	TRUE	TRUE
901	STE6	P12866	Alpha-factor-transporting ATPase OS=Saccharomyces cerevisiae (strain ATCC 204508 / S288c) GN=STE6 PE=1 SV=1	3	1	1	1	6	3	5	6.04191	2.0727	21.4285	5.78153	4.4432e-05	5.32099e-05	1.77964	0.968599	0.74182	0.74182	Total_CL - Total_NoCL	limma	4.4432e-05	5.32099e-05	TRUE	enriched hit	6.04191	FALSE	TRUE	TRUE
902	SMI1	P32566	Cell wall assembly regulator SMI1 OS=Saccharomyces cerevisiae (strain ATCC 204508 / S288c) GN=SMI1 PE=1 SV=1	3	1	1	1	6	3	5	6.37786	3.06595	21.8528	5.7544	4.66215e-05	5.57701e-05	1.73495	0.968746	0.74182	0.74182	Total_CL - Total_NoCL	limma	4.66215e-05	5.57701e-05	TRUE	enriched hit	6.37786	FALSE	TRUE	TRUE
903	GEA2	P39993	ARF guanine-nucleotide exchange factor 2 OS=Saccharomyces cerevisiae (strain ATCC 204508 / S288c) GN=GEA2 PE=1 SV=1	2	1	1	NA	6	2	6	5.6571	2.14218	21.9346	5.72654	4.89873e-05	5.85352e-05	1.78571	0.968897	0.74182	0.74182	Total_CL - Total_NoCL	limma	4.89873e-05	5.85352e-05	TRUE	enriched hit	5.6571	FALSE	TRUE	TRUE
904	UTP5	Q04177	U3 small nucleolar RNA-associated protein 5 OS=Saccharomyces cerevisiae (strain ATCC 204508 / S288c) GN=UTP5 PE=1 SV=1	3	1	1	1	6	3	4	6.51931	2.26322	20.8719	5.7239	4.92178e-05	5.87456e-05	1.68608	0.968911	0.74182	0.74182	Total_CL - Total_NoCL	limma	4.92178e-05	5.87456e-05	TRUE	enriched hit	6.51931	FALSE	TRUE	TRUE
905	UTP9	P38882	U3 small nucleolar RNA-associated protein 9 OS=Saccharomyces cerevisiae (strain ATCC 204508 / S288c) GN=UTP9 PE=1 SV=1	2	1	1	NA	5	2	2	5.80791	2.95866	19.5759	5.71407	5.00856e-05	5.97154e-05	2.21182	0.968965	0.74182	0.74182	Total_CL - Total_NoCL	limma	5.00856e-05	5.97154e-05	TRUE	enriched hit	5.80791	FALSE	TRUE	TRUE
906	YET3	Q07451	Endoplasmic reticulum transmembrane protein 3 OS=Saccharomyces cerevisiae (strain ATCC 204508 / S288c) GN=YET3 PE=1 SV=1	2	NA	1	1	6	2	5	6.31736	2.32787	22.1078	5.69579	5.17441e-05	6.16246e-05	2.19475	0.969064	0.74182	0.74182	Total_CL - Total_NoCL	limma	5.17441e-05	6.16246e-05	TRUE	enriched hit	6.31736	FALSE	TRUE	TRUE
907	MSH6	Q03834	DNA mismatch repair protein MSH6 OS=Saccharomyces cerevisiae (strain ATCC 204508 / S288c) GN=MSH6 PE=1 SV=1	2	1	1	NA	6	2	8	5.7439	2.12642	21.9291	5.68838	5.24318e-05	6.23748e-05	1.716	0.969104	0.74182	0.74182	Total_CL - Total_NoCL	limma	5.24318e-05	6.23748e-05	TRUE	enriched hit	5.7439	FALSE	TRUE	TRUE
908	SPT16	P32558	FACT complex subunit SPT16 OS=Saccharomyces cerevisiae (strain ATCC 204508 / S288c) GN=SPT16 PE=1 SV=1	3	1	1	1	6	3	14	6.22297	2.44084	22.4516	5.68672	5.25874e-05	6.24499e-05	1.6061	0.969113	0.74182	0.74182	Total_CL - Total_NoCL	limma	5.25874e-05	6.24499e-05	TRUE	enriched hit	6.22297	FALSE	TRUE	TRUE
909	CTR9	P89105	RNA polymerase-associated protein CTR9 OS=Saccharomyces cerevisiae (strain ATCC 204508 / S288c) GN=CTR9 PE=1 SV=3	3	1	1	1	6	3	14	6.11666	2.52157	22.0262	5.68647	5.26107e-05	6.24499e-05	1.60564	0.969115	0.74182	0.74182	Total_CL - Total_NoCL	limma	5.26107e-05	6.24499e-05	TRUE	enriched hit	6.11666	FALSE	TRUE	TRUE
910	NAF1	P53919	H/ACA ribonucleoprotein complex non-core subunit NAF1 OS=Saccharomyces cerevisiae (strain ATCC 204508 / S288c) GN=NAF1 PE=1 SV=1	2	1	NA	1	6	2	4	6.06553	3.47805	20.2292	5.68096	5.31313e-05	6.29985e-05	1.70241	0.969145	0.74182	0.74182	Total_CL - Total_NoCL	limma	5.31313e-05	6.29985e-05	TRUE	enriched hit	6.06553	FALSE	TRUE	TRUE
911	UTP13	Q05946	U3 small nucleolar RNA-associated protein 13 OS=Saccharomyces cerevisiae (strain ATCC 204508 / S288c) GN=UTP13 PE=1 SV=1	3	1	1	1	6	3	3	5.95771	2.09529	20.7014	5.67503	5.36961e-05	6.35983e-05	1.58462	0.969177	0.74182	0.74182	Total_CL - Total_NoCL	limma	5.36961e-05	6.35983e-05	TRUE	enriched hit	5.95771	FALSE	TRUE	TRUE
912	SMT3	Q12306	Ubiquitin-like protein SMT3 OS=Saccharomyces cerevisiae (strain ATCC 204508 / S288c) GN=SMT3 PE=1 SV=1	3	1	1	1	6	3	4	6.45143	3.38494	20.1236	5.66858	5.4318e-05	6.42644e-05	1.74293	0.969212	0.74182	0.74182	Total_CL - Total_NoCL	limma	5.4318e-05	6.42644e-05	TRUE	enriched hit	6.45143	FALSE	TRUE	TRUE
913	ABP140	Q08641	tRNA(Thr) (cytosine(32)-N(3))-methyltransferase OS=Saccharomyces cerevisiae (strain ATCC 204508 / S288c) GN=ABP140 PE=1 SV=3	3	1	1	1	6	3	17	7.04895	2.12267	24.3562	5.65106	5.60467e-05	6.62371e-05	1.54051	0.969307	0.74182	0.74182	Total_CL - Total_NoCL	limma	5.60467e-05	6.62371e-05	TRUE	enriched hit	7.04895	FALSE	TRUE	TRUE
914	SPT6	P23615	Transcription elongation factor SPT6 OS=Saccharomyces cerevisiae (strain ATCC 204508 / S288c) GN=SPT6 PE=1 SV=1	3	1	1	1	6	3	28	6.5741	2.40845	23.9154	5.62222	5.90167e-05	6.96707e-05	1.48737	0.969463	0.74182	0.74182	Total_CL - Total_NoCL	limma	5.90167e-05	6.96707e-05	TRUE	enriched hit	6.5741	FALSE	TRUE	TRUE
915	PTM1	P32857	Membrane protein PTM1 OS=Saccharomyces cerevisiae (strain ATCC 204508 / S288c) GN=PTM1 PE=1 SV=2	2	1	1	NA	6	2	2	6.43152	1.29788	20.279	5.61642	5.96346e-05	7.03232e-05	1.59376	0.969495	0.74182	0.74182	Total_CL - Total_NoCL	limma	5.96346e-05	7.03232e-05	TRUE	enriched hit	6.43152	FALSE	TRUE	TRUE
916	PKC1	P24583	Protein kinase C-like 1 OS=Saccharomyces cerevisiae (strain ATCC 204508 / S288c) GN=PKC1 PE=1 SV=3	2	1	NA	1	6	2	2	5.55037	2.7733	19.7216	5.61044	6.02775e-05	7.09934e-05	1.76608	0.969527	0.74182	0.74182	Total_CL - Total_NoCL	limma	6.02775e-05	7.09934e-05	TRUE	enriched hit	5.55037	FALSE	TRUE	TRUE
917	HXT2	P23585	High-affinity glucose transporter HXT2 OS=Saccharomyces cerevisiae (strain ATCC 204508 / S288c) GN=HXT2 PE=1 SV=1	3	1	1	1	6	3	5	6.58658	2.09427	21.7258	5.60991	6.03345e-05	7.09934e-05	1.48389	0.96953	0.74182	0.74182	Total_CL - Total_NoCL	limma	6.03345e-05	7.09934e-05	TRUE	enriched hit	6.58658	FALSE	TRUE	TRUE
918	RPN5	Q12250	26S proteasome regulatory subunit RPN5 OS=Saccharomyces cerevisiae (strain ATCC 204508 / S288c) GN=RPN5 PE=1 SV=3	3	1	1	1	6	3	3	5.70075	2.23656	20.5024	5.60534	6.08315e-05	7.15002e-05	1.47541	0.969555	0.74182	0.74182	Total_CL - Total_NoCL	limma	6.08315e-05	7.15002e-05	TRUE	enriched hit	5.70075	FALSE	TRUE	TRUE
919	YRA2	P36036	RNA annealing protein YRA2 OS=Saccharomyces cerevisiae (strain ATCC 204508 / S288c) GN=YRA2 PE=1 SV=1	2	NA	1	1	6	2	3	5.76664	3.85691	20.3954	5.58685	6.28858e-05	7.38343e-05	2.01163	0.969655	0.74182	0.74182	Total_CL - Total_NoCL	limma	6.28858e-05	7.38343e-05	TRUE	enriched hit	5.76664	FALSE	TRUE	TRUE
920	CEX1	Q12453	Cytoplasmic export protein 1 OS=Saccharomyces cerevisiae (strain ATCC 204508 / S288c) GN=CEX1 PE=1 SV=1	2	NA	1	1	6	2	3	5.51608	4.47986	19.4199	5.55288	6.68505e-05	7.8404e-05	1.95407	0.96984	0.74182	0.74182	Total_CL - Total_NoCL	limma	6.68505e-05	7.8404e-05	TRUE	enriched hit	5.51608	FALSE	TRUE	TRUE
921	TFA1	P36100	Transcription initiation factor IIE subunit alpha OS=Saccharomyces cerevisiae (strain ATCC 204508 / S288c) GN=TFA1 PE=1 SV=1	3	1	1	1	6	3	4	6.16166	2.72758	20.5637	5.55117	6.7057e-05	7.85608e-05	1.5275	0.969849	0.74182	0.74182	Total_CL - Total_NoCL	limma	6.7057e-05	7.85608e-05	TRUE	enriched hit	6.16166	TRUE	TRUE	FALSE
922	PIN2	Q12057	[PSI+] induction protein 2 OS=Saccharomyces cerevisiae (strain ATCC 204508 / S288c) GN=PIN2 PE=1 SV=1	2	1	NA	1	5	2	2	6.07663	1.68582	20.9464	5.54488	6.78215e-05	7.93703e-05	1.47841	0.969883	0.74182	0.74182	Total_CL - Total_NoCL	limma	6.78215e-05	7.93703e-05	TRUE	enriched hit	6.07663	FALSE	TRUE	TRUE
923	PLB2	Q03674	Lysophospholipase 2 OS=Saccharomyces cerevisiae (strain ATCC 204508 / S288c) GN=PLB2 PE=1 SV=1	3	1	1	1	6	3	5	6.95844	1.67599	23.7293	5.5174	7.1271e-05	8.33168e-05	1.29325	0.970032	0.74182	0.74182	Total_CL - Total_NoCL	limma	7.1271e-05	8.33168e-05	TRUE	enriched hit	6.95844	TRUE	TRUE	FALSE
924	EMC1	P25574	ER membrane protein complex subunit 1 OS=Saccharomyces cerevisiae (strain ATCC 204508 / S288c) GN=EMC1 PE=1 SV=1	3	1	1	1	6	3	9	6.22683	2.57944	21.6242	5.51431	7.167e-05	8.36925e-05	1.28751	0.970049	0.74182	0.74182	Total_CL - Total_NoCL	limma	7.167e-05	8.36925e-05	TRUE	enriched hit	6.22683	TRUE	TRUE	FALSE
925	RSN1	Q03516	Uncharacterized protein RSN1 OS=Saccharomyces cerevisiae (strain ATCC 204508 / S288c) GN=RSN1 PE=1 SV=1	3	1	1	1	6	3	17	6.70297	1.69069	23.9539	5.51077	7.21305e-05	8.41393e-05	1.28092	0.970068	0.74182	0.74182	Total_CL - Total_NoCL	limma	7.21305e-05	8.41393e-05	TRUE	enriched hit	6.70297	FALSE	TRUE	TRUE
926	UTP8	P53276	U3 small nucleolar RNA-associated protein 8 OS=Saccharomyces cerevisiae (strain ATCC 204508 / S288c) GN=UTP8 PE=1 SV=1	2	NA	1	1	6	2	2	5.8666	3.53266	19.7463	5.49074	7.4793e-05	8.71508e-05	1.84841	0.970177	0.74182	0.74182	Total_CL - Total_NoCL	limma	7.4793e-05	8.71508e-05	TRUE	enriched hit	5.8666	FALSE	TRUE	TRUE
927	SFA1	P32771	S-(hydroxymethyl)glutathione dehydrogenase OS=Saccharomyces cerevisiae (strain ATCC 204508 / S288c) GN=SFA1 PE=1 SV=1	3	1	1	1	6	3	5	6.57497	2.68831	22.195	5.48519	7.5548e-05	8.79356e-05	1.23331	0.970207	0.74182	0.74182	Total_CL - Total_NoCL	limma	7.5548e-05	8.79356e-05	TRUE	enriched hit	6.57497	TRUE	TRUE	FALSE
928	GCD1	P09032	Translation initiation factor eIF-2B subunit gamma OS=Saccharomyces cerevisiae (strain ATCC 204508 / S288c) GN=GCD1 PE=1 SV=3	2	1	1	NA	6	2	4	5.98082	2.82108	21.1324	5.45457	7.98623e-05	9.28571e-05	1.29451	0.970374	0.74182	0.74182	Total_CL - Total_NoCL	limma	7.98623e-05	9.28571e-05	TRUE	enriched hit	5.98082	FALSE	TRUE	TRUE
929	PEP1	P32319	Vacuolar protein sorting/targeting protein VPS10 OS=Saccharomyces cerevisiae (strain ATCC 204508 / S288c) GN=PEP1 PE=1 SV=1	3	1	1	1	6	3	15	6.42795	2.81246	22.7888	5.42467	8.43223e-05	9.79374e-05	1.12034	0.970536	0.74182	0.74182	Total_CL - Total_NoCL	limma	8.43223e-05	9.79374e-05	TRUE	enriched hit	6.42795	FALSE	TRUE	TRUE
930	LHS1	P36016	Heat shock protein 70 homolog LHS1 OS=Saccharomyces cerevisiae (strain ATCC 204508 / S288c) GN=LHS1 PE=1 SV=1	3	1	1	1	6	3	15	6.30896	1.90351	23.1732	5.38206	9.11301e-05	0.00010573	1.04054	0.970767	0.74182	0.74182	Total_CL - Total_NoCL	limma	9.11301e-05	0.00010573	TRUE	enriched hit	6.30896	TRUE	TRUE	FALSE
931	CCW14	O13547	Covalently-linked cell wall protein 14 OS=Saccharomyces cerevisiae (strain ATCC 204508 / S288c) GN=CCW14 PE=1 SV=1	2	1	1	NA	6	2	2	6.0328	1.85766	21.3729	5.3774	9.19087e-05	0.000106519	1.14073	0.970792	0.74182	0.74182	Total_CL - Total_NoCL	limma	9.19087e-05	0.000106519	TRUE	enriched hit	6.0328	FALSE	TRUE	TRUE
932	ESC1	Q03661	Silent chromatin protein ESC1 OS=Saccharomyces cerevisiae (strain ATCC 204508 / S288c) GN=ESC1 PE=1 SV=1	3	1	1	1	6	3	18	6.73511	2.14454	24.2795	5.35793	9.52385e-05	0.00011026	0.99523	0.970898	0.74182	0.74182	Total_CL - Total_NoCL	limma	9.52385e-05	0.00011026	TRUE	enriched hit	6.73511	FALSE	TRUE	TRUE
933	FAA3	P39002	Long-chain-fatty-acid--CoA ligase 3 OS=Saccharomyces cerevisiae (strain ATCC 204508 / S288c) GN=FAA3 PE=1 SV=1	2	NA	1	1	6	2	3	5.77065	3.38876	20.0658	5.32551	0.000101062	0.000116876	1.56451	0.971074	0.74182	0.74182	Total_CL - Total_NoCL	limma	0.000101062	0.000116876	TRUE	enriched hit	5.77065	FALSE	TRUE	TRUE
934	GCD6	P32501	Translation initiation factor eIF-2B subunit epsilon OS=Saccharomyces cerevisiae (strain ATCC 204508 / S288c) GN=GCD6 PE=1 SV=1	3	1	1	1	6	3	9	6.36231	2.27449	22.0498	5.3054	0.000104859	0.000121138	0.896375	0.971183	0.74182	0.74182	Total_CL - Total_NoCL	limma	0.000104859	0.000121138	TRUE	enriched hit	6.36231	FALSE	TRUE	TRUE
935	PWP1	P21304	Periodic tryptophan protein 1 OS=Saccharomyces cerevisiae (strain ATCC 204508 / S288c) GN=PWP1 PE=1 SV=1	3	1	1	1	6	3	6	6.35516	2.14908	22.0743	5.28762	0.000108339	0.000125025	0.862842	0.97128	0.74182	0.74182	Total_CL - Total_NoCL	limma	0.000108339	0.000125025	TRUE	enriched hit	6.35516	FALSE	TRUE	TRUE
936	RPS1B	P23248	40S ribosomal protein S1-B OS=Saccharomyces cerevisiae (strain ATCC 204508 / S288c) GN=RPS1B PE=1 SV=3	3	1	1	1	5	3	3	7.28357	5.56401	20.3666	5.23424	0.000119529	0.00013779	1.40866	0.97157	0.74182	0.74182	Total_CL - Total_NoCL	limma	0.000119529	0.00013779	TRUE	enriched hit	7.28357	TRUE	TRUE	FALSE
937	YOR1	P53049	Oligomycin resistance ATP-dependent permease YOR1 OS=Saccharomyces cerevisiae (strain ATCC 204508 / S288c) GN=YOR1 PE=1 SV=1	3	1	1	1	6	3	16	6.13661	2.23696	22.6868	5.21822	0.000123115	0.000141773	0.73158	0.971657	0.74182	0.74182	Total_CL - Total_NoCL	limma	0.000123115	0.000141773	TRUE	enriched hit	6.13661	FALSE	TRUE	TRUE
938	MNN2	P38069	Alpha-1,2-mannosyltransferase MNN2 OS=Saccharomyces cerevisiae (strain ATCC 204508 / S288c) GN=MNN2 PE=1 SV=1	3	1	1	1	6	3	14	6.43004	2.16181	23.3718	5.21619	0.000123579	0.000142155	0.727723	0.971668	0.74182	0.74182	Total_CL - Total_NoCL	limma	0.000123579	0.000142155	TRUE	enriched hit	6.43004	TRUE	TRUE	FALSE
939	MIA40	P36046	Mitochondrial intermembrane space import and assembly protein 40 OS=Saccharomyces cerevisiae (strain ATCC 204508 / S288c) GN=MIA40 PE=1 SV=2	3	1	1	1	6	3	21	7.53317	2.48403	24.0285	5.21556	0.000123723	0.00014217	0.726521	0.971671	0.74182	0.74182	Total_CL - Total_NoCL	limma	0.000123723	0.00014217	TRUE	enriched hit	7.53317	FALSE	TRUE	TRUE
940	UBP1	P25037	Ubiquitin carboxyl-terminal hydrolase 1 OS=Saccharomyces cerevisiae (strain ATCC 204508 / S288c) GN=UBP1 PE=1 SV=2	2	1	1	NA	6	2	4	6.12756	2.86064	20.9728	5.21286	0.000124342	0.000142729	0.831391	0.971686	0.74182	0.74182	Total_CL - Total_NoCL	limma	0.000124342	0.000142729	TRUE	enriched hit	6.12756	TRUE	TRUE	FALSE
941	AVL9	Q12500	Late secretory pathway protein AVL9 OS=Saccharomyces cerevisiae (strain ATCC 204508 / S288c) GN=AVL9 PE=1 SV=1	3	1	1	1	6	3	15	7.10513	2.54651	23.8583	5.20481	0.000126205	0.000144713	0.70614	0.97173	0.74182	0.74182	Total_CL - Total_NoCL	limma	0.000126205	0.000144713	TRUE	enriched hit	7.10513	FALSE	TRUE	TRUE
942	SLG1	P54867	Protein SLG1 OS=Saccharomyces cerevisiae (strain ATCC 204508 / S288c) GN=SLG1 PE=1 SV=1	3	1	1	1	6	3	4	6.67652	1.59125	21.9445	5.18687	0.000130463	0.000149437	0.672091	0.971827	0.74182	0.74182	Total_CL - Total_NoCL	limma	0.000130463	0.000149437	TRUE	enriched hit	6.67652	FALSE	TRUE	TRUE
943	CWP1	P28319	Cell wall protein CWP1 OS=Saccharomyces cerevisiae (strain ATCC 204508 / S288c) GN=CWP1 PE=1 SV=2	3	1	1	1	6	3	10	7.46431	1.78151	24.2949	5.17274	0.000133922	0.000153236	0.645242	0.971904	0.74182	0.74182	Total_CL - Total_NoCL	limma	0.000133922	0.000153236	TRUE	enriched hit	7.46431	TRUE	TRUE	FALSE
944	RTT106	P40161	Histone chaperone RTT106 OS=Saccharomyces cerevisiae (strain ATCC 204508 / S288c) GN=RTT106 PE=1 SV=1	2	1	1	NA	6	2	5	5.80335	1.47024	20.9892	5.1395	0.000142441	0.000162812	0.914015	0.972084	0.74182	0.74182	Total_CL - Total_NoCL	limma	0.000142441	0.000162812	TRUE	enriched hit	5.80335	FALSE	TRUE	TRUE
945	TLG1	Q03322	T-SNARE affecting a late Golgi compartment protein 1 OS=Saccharomyces cerevisiae (strain ATCC 204508 / S288c) GN=TLG1 PE=1 SV=1	3	1	1	1	6	3	4	6.47168	1.74803	22.2899	5.09402	0.000155017	0.000176998	0.495209	0.972331	0.74182	0.74182	Total_CL - Total_NoCL	limma	0.000155017	0.000176998	TRUE	enriched hit	6.47168	FALSE	TRUE	TRUE
946	PDR5	P33302	Pleiotropic ABC efflux transporter of multiple drugs OS=Saccharomyces cerevisiae (strain ATCC 204508 / S288c) GN=PDR5 PE=1 SV=1	3	1	1	1	6	3	29	7.48626	2.32938	24.8174	5.08312	0.000158195	0.000180436	0.474399	0.97239	0.74182	0.74182	Total_CL - Total_NoCL	limma	0.000158195	0.000180436	TRUE	enriched hit	7.48626	FALSE	TRUE	TRUE
947	FCP1	Q03254	RNA polymerase II subunit A C-terminal domain phosphatase OS=Saccharomyces cerevisiae (strain ATCC 204508 / S288c) GN=FCP1 PE=1 SV=1	3	1	1	1	6	3	4	6.59304	3.78842	21.8427	5.07791	0.000159741	0.000182007	0.638913	0.972419	0.74182	0.74182	Total_CL - Total_NoCL	limma	0.000159741	0.000182007	TRUE	enriched hit	6.59304	FALSE	TRUE	TRUE
948	YCF1	P39109	Metal resistance protein YCF1 OS=Saccharomyces cerevisiae (strain ATCC 204508 / S288c) GN=YCF1 PE=1 SV=2	3	1	1	1	6	3	14	6.3453	2.36536	22.1839	5.05412	0.000166994	0.000190071	0.418911	0.972548	0.74182	0.74182	Total_CL - Total_NoCL	limma	0.000166994	0.000190071	TRUE	enriched hit	6.3453	FALSE	TRUE	TRUE
949	PHO11|PHO12	P35842|P38693	Acid phosphatase PHO11 OS=Saccharomyces cerevisiae (strain ATCC 204508 / S288c) GN=PHO11 PE=1 SV=1|Acid phosphatase PHO12 OS=Saccharomyces cerevisiae (strain ATCC 204508 / S288c) GN=PHO12 PE=1 SV=1	3	1	1	1	6	3	6	6.7438	1.24202	22.898	5.00422	0.00018334	0.000208455	0.323219	0.972819	0.74182	0.74182	Total_CL - Total_NoCL	limma	0.00018334	0.000208455	TRUE	enriched hit	6.7438	FALSE	TRUE	TRUE
950	SGD1	Q06132	Suppressor of glycerol defect protein 1 OS=Saccharomyces cerevisiae (strain ATCC 204508 / S288c) GN=SGD1 PE=1 SV=1	2	NA	1	1	6	2	4	5.67892	3.47921	20.8555	4.99994	0.000184817	0.000209913	0.993514	0.972842	0.74182	0.74182	Total_CL - Total_NoCL	limma	0.000184817	0.000209913	TRUE	enriched hit	5.67892	FALSE	TRUE	TRUE
951	TCB1	Q12466	Tricalbin-1 OS=Saccharomyces cerevisiae (strain ATCC 204508 / S288c) GN=TCB1 PE=1 SV=1	2	NA	1	1	6	2	6	6.22672	3.04441	21.1829	4.99681	0.000185904	0.000210925	0.987958	0.972859	0.74182	0.74182	Total_CL - Total_NoCL	limma	0.000185904	0.000210925	TRUE	enriched hit	6.22672	FALSE	TRUE	TRUE
952	PSE1	P32337	Importin subunit beta-3 OS=Saccharomyces cerevisiae (strain ATCC 204508 / S288c) GN=PSE1 PE=1 SV=2	2	NA	1	1	6	2	4	5.9568	3.15912	21.3505	4.98319	0.000190715	0.000216157	0.963744	0.972933	0.74182	0.74182	Total_CL - Total_NoCL	limma	0.000190715	0.000216157	TRUE	enriched hit	5.9568	FALSE	TRUE	TRUE
953	YGR130C	P53278	Uncharacterized protein YGR130C OS=Saccharomyces cerevisiae (strain ATCC 204508 / S288c) GN=YGR130C PE=1 SV=1	3	1	1	1	6	3	11	7.08664	2.28183	24.0311	4.98226	0.000191048	0.000216307	0.281034	0.972938	0.74182	0.74182	Total_CL - Total_NoCL	limma	0.000191048	0.000216307	TRUE	enriched hit	7.08664	FALSE	TRUE	TRUE
954	KRE2	P27809	Glycolipid 2-alpha-mannosyltransferase OS=Saccharomyces cerevisiae (strain ATCC 204508 / S288c) GN=KRE2 PE=1 SV=1	3	1	1	1	6	3	11	7.01054	1.86723	24.1593	4.95476	0.00020118	0.000227541	0.228111	0.973087	0.74182	0.74182	Total_CL - Total_NoCL	limma	0.00020118	0.000227541	TRUE	enriched hit	7.01054	TRUE	TRUE	FALSE
955	AXL2	P38928	Axial budding pattern protein 2 OS=Saccharomyces cerevisiae (strain ATCC 204508 / S288c) GN=AXL2 PE=1 SV=1	3	1	1	1	6	3	12	6.75829	2.09358	23.8999	4.93833	0.000207499	0.000234442	0.196446	0.973176	0.74182	0.74182	Total_CL - Total_NoCL	limma	0.000207499	0.000234442	TRUE	enriched hit	6.75829	TRUE	TRUE	FALSE
956	GPD2	P41911	Glycerol-3-phosphate dehydrogenase [NAD(+)] 2, mitochondrial OS=Saccharomyces cerevisiae (strain ATCC 204508 / S288c) GN=GPD2 PE=1 SV=2	2	NA	1	1	6	2	3	6.0331	4.80039	19.2896	4.92301	0.000213571	0.000241049	0.857281	0.97326	0.74182	0.74182	Total_CL - Total_NoCL	limma	0.000213571	0.000241049	TRUE	enriched hit	6.0331	FALSE	TRUE	TRUE
957	PMT1	P33775	Dolichyl-phosphate-mannose--protein mannosyltransferase 1 OS=Saccharomyces cerevisiae (strain ATCC 204508 / S288c) GN=PMT1 PE=1 SV=1	3	1	1	1	6	3	9	7.06457	2.50953	23.529	4.92163	0.000214129	0.000241426	0.164249	0.973267	0.74182	0.74182	Total_CL - Total_NoCL	limma	0.000214129	0.000241426	TRUE	enriched hit	7.06457	FALSE	TRUE	TRUE
958	DBP7	P36120	ATP-dependent RNA helicase DBP7 OS=Saccharomyces cerevisiae (strain ATCC 204508 / S288c) GN=DBP7 PE=1 SV=1	2	1	1	NA	6	2	2	5.59922	2.26362	20.6193	4.90214	0.000222147	0.000250205	0.38239	0.973373	0.74182	0.74182	Total_CL - Total_NoCL	limma	0.000222147	0.000250205	TRUE	enriched hit	5.59922	FALSE	TRUE	TRUE
959	CTR1	P49573	Copper transport protein CTR1 OS=Saccharomyces cerevisiae (strain ATCC 204508 / S288c) GN=CTR1 PE=1 SV=1	3	1	1	1	6	3	7	6.82323	2.46427	22.6287	4.89891	0.000223507	0.000251474	0.120376	0.97339	0.74182	0.74182	Total_CL - Total_NoCL	limma	0.000223507	0.000251474	TRUE	enriched hit	6.82323	FALSE	TRUE	TRUE
960	ESF1	Q06344	Pre-rRNA-processing protein ESF1 OS=Saccharomyces cerevisiae (strain ATCC 204508 / S288c) GN=ESF1 PE=1 SV=1	3	1	1	1	6	3	5	5.95215	2.06937	21.2718	4.89617	0.000224663	0.000252512	0.115095	0.973405	0.74182	0.74182	Total_CL - Total_NoCL	limma	0.000224663	0.000252512	TRUE	enriched hit	5.95215	FALSE	TRUE	TRUE
961	YPL225W	Q08971	Protein PBDC1 homolog OS=Saccharomyces cerevisiae (strain ATCC 204508 / S288c) GN=YPL225W PE=1 SV=1	2	NA	1	1	6	2	2	5.70109	3.11625	19.7612	4.88387	0.000229944	0.000258179	0.786392	0.973472	0.74182	0.74182	Total_CL - Total_NoCL	limma	0.000229944	0.000258179	TRUE	enriched hit	5.70109	FALSE	TRUE	TRUE
962	FUI1	P38196	Uridine permease OS=Saccharomyces cerevisiae (strain ATCC 204508 / S288c) GN=FUI1 PE=1 SV=1	3	1	1	1	6	3	6	6.47733	2.294	22.0791	4.85111	0.000244645	0.000274399	0.0279185	0.97365	0.74182	0.74182	Total_CL - Total_NoCL	limma	0.000244645	0.000274399	TRUE	enriched hit	6.47733	FALSE	TRUE	TRUE
963	SAS10	Q12136	Something about silencing protein 10 OS=Saccharomyces cerevisiae (strain ATCC 204508 / S288c) GN=SAS10 PE=1 SV=1	3	1	1	1	6	3	10	6.10913	1.59844	22.2964	4.85041	0.000244965	0.000274473	0.0265787	0.973654	0.74182	0.74182	Total_CL - Total_NoCL	limma	0.000244965	0.000274473	TRUE	enriched hit	6.10913	FALSE	TRUE	TRUE
964	BAP2	P38084	Leu/Val/Ile amino-acid permease OS=Saccharomyces cerevisiae (strain ATCC 204508 / S288c) GN=BAP2 PE=1 SV=2	3	1	1	1	6	3	7	6.41252	1.92185	21.8988	4.83035	0.000254459	0.000284814	-0.0123104	0.973763	0.74182	0.74182	Total_CL - Total_NoCL	limma	0.000254459	0.000284814	TRUE	enriched hit	6.41252	FALSE	TRUE	TRUE
965	FUN30	P31380	ATP-dependent helicase FUN30 OS=Saccharomyces cerevisiae (strain ATCC 204508 / S288c) GN=FUN30 PE=1 SV=1	2	1	1	NA	6	2	6	5.74328	2.00645	21.2109	4.79281	0.000273248	0.000305528	0.0273852	0.973966	0.74182	0.74182	Total_CL - Total_NoCL	limma	0.000273248	0.000305528	TRUE	enriched hit	5.74328	FALSE	TRUE	TRUE
966	URA5	P13298	Orotate phosphoribosyltransferase 1 OS=Saccharomyces cerevisiae (strain ATCC 204508 / S288c) GN=URA5 PE=1 SV=2	2	NA	1	1	6	2	3	5.96978	3.86956	20.0274	4.77788	0.000281119	0.000314004	0.601566	0.974048	0.74182	0.74182	Total_CL - Total_NoCL	limma	0.000281119	0.000314004	TRUE	enriched hit	5.96978	FALSE	TRUE	TRUE
967	BUD14	P27637	Bud site selection protein 14 OS=Saccharomyces cerevisiae (strain ATCC 204508 / S288c) GN=BUD14 PE=1 SV=4	3	1	1	1	6	3	8	6.40803	2.21914	23.131	4.70666	0.000321998	0.000359293	-0.252892	0.974434	0.74182	0.74182	Total_CL - Total_NoCL	limma	0.000321998	0.000359293	TRUE	enriched hit	6.40803	FALSE	TRUE	TRUE
968	YFR018C	P43599	Uncharacterized protein YFR018C OS=Saccharomyces cerevisiae (strain ATCC 204508 / S288c) GN=YFR018C PE=1 SV=1	3	1	1	1	6	3	4	6.34143	1.90984	21.0824	4.70463	0.00032325	0.000360317	-0.256854	0.974445	0.74182	0.74182	Total_CL - Total_NoCL	limma	0.00032325	0.000360317	TRUE	enriched hit	6.34143	TRUE	TRUE	FALSE
969	SLC1	P33333	Probable 1-acyl-sn-glycerol-3-phosphate acyltransferase OS=Saccharomyces cerevisiae (strain ATCC 204508 / S288c) GN=SLC1 PE=1 SV=1	2	NA	1	1	6	2	2	6.32393	3.79473	21.2182	4.66345	0.000349744	0.000389447	0.388292	0.974669	0.74182	0.74182	Total_CL - Total_NoCL	limma	0.000349744	0.000389447	TRUE	enriched hit	6.32393	FALSE	TRUE	TRUE
970	HXT4	P32467	Low-affinity glucose transporter HXT4 OS=Saccharomyces cerevisiae (strain ATCC 204508 / S288c) GN=HXT4 PE=1 SV=1	2	NA	1	1	6	2	2	5.99496	2.34756	20.4891	4.61781	0.000381746	0.000424643	0.306346	0.974917	0.74182	0.74182	Total_CL - Total_NoCL	limma	0.000381746	0.000424643	TRUE	enriched hit	5.99496	FALSE	TRUE	TRUE
971	GPI13	Q07830	GPI ethanolamine phosphate transferase 3 OS=Saccharomyces cerevisiae (strain ATCC 204508 / S288c) GN=GPI13 PE=1 SV=1	2	NA	1	1	6	2	4	6.16457	2.22176	21.4535	4.57674	0.000413113	0.000459062	0.23007	0.97514	0.74182	0.74182	Total_CL - Total_NoCL	limma	0.000413113	0.000459062	TRUE	enriched hit	6.16457	FALSE	TRUE	TRUE
972	YFL034W	P43564	Uncharacterized membrane protein YFL034W OS=Saccharomyces cerevisiae (strain ATCC 204508 / S288c) GN=YFL034W PE=1 SV=2	2	NA	1	1	6	2	4	5.72409	2.57739	20.9392	4.55262	0.000432762	0.000480401	0.185906	0.975271	0.74182	0.74182	Total_CL - Total_NoCL	limma	0.000432762	0.000480401	TRUE	enriched hit	5.72409	FALSE	TRUE	TRUE
973	ARX1	Q03862	Probable metalloprotease ARX1 OS=Saccharomyces cerevisiae (strain ATCC 204508 / S288c) GN=ARX1 PE=1 SV=1	2	NA	1	1	6	2	5	6.0224	3.42742	20.6103	4.55209	0.000433209	0.000480404	0.184924	0.975274	0.74182	0.74182	Total_CL - Total_NoCL	limma	0.000433209	0.000480404	TRUE	enriched hit	6.0224	FALSE	TRUE	TRUE
974	RPN7	Q06103	26S proteasome regulatory subunit RPN7 OS=Saccharomyces cerevisiae (strain ATCC 204508 / S288c) GN=RPN7 PE=1 SV=3	3	1	1	1	6	3	6	5.89427	2.80839	21.6264	4.54092	0.000442638	0.000490356	-0.57753	0.975334	0.74182	0.74182	Total_CL - Total_NoCL	limma	0.000442638	0.000490356	TRUE	enriched hit	5.89427	FALSE	TRUE	TRUE
975	PEP4	P07267	Saccharopepsin OS=Saccharomyces cerevisiae (strain ATCC 204508 / S288c) GN=PEP4 PE=1 SV=1	3	1	1	1	6	3	3	5.75666	2.00998	20.3482	4.49501	0.000483684	0.000535277	-0.662713	0.975584	0.74182	0.74182	Total_CL - Total_NoCL	limma	0.000483684	0.000535277	TRUE	enriched hit	5.75666	TRUE	TRUE	FALSE
976	MCM5	P29496	Minichromosome maintenance protein 5 OS=Saccharomyces cerevisiae (strain ATCC 204508 / S288c) GN=MCM5 PE=1 SV=1	2	NA	1	1	6	2	5	5.81632	2.75126	21.3355	4.45718	0.000520439	0.000575362	0.0105275	0.975789	0.74182	0.74182	Total_CL - Total_NoCL	limma	0.000520439	0.000575362	TRUE	enriched hit	5.81632	FALSE	TRUE	TRUE
977	HHF1	P02309	Histone H4 OS=Saccharomyces cerevisiae (strain ATCC 204508 / S288c) GN=HHF1 PE=1 SV=2	3	1	1	1	6	3	5	6.45118	1.90113	22.7653	4.4524	0.000525281	0.00058012	-0.751878	0.975815	0.74182	0.74182	Total_CL - Total_NoCL	limma	0.000525281	0.00058012	TRUE	enriched hit	6.45118	FALSE	TRUE	TRUE
978	RET1	P22276	DNA-directed RNA polymerase III subunit RPC2 OS=Saccharomyces cerevisiae (strain ATCC 204508 / S288c) GN=RET1 PE=1 SV=2	2	NA	1	1	6	2	3	6.13461	3.24812	20.7281	4.41542	0.000564363	0.000622646	-0.0665156	0.976016	0.74182	0.74182	Total_CL - Total_NoCL	limma	0.000564363	0.000622646	TRUE	enriched hit	6.13461	FALSE	TRUE	TRUE
979	RIA1	P53893	Ribosome assembly protein 1 OS=Saccharomyces cerevisiae (strain ATCC 204508 / S288c) GN=RIA1 PE=1 SV=1	2	NA	1	1	6	2	2	5.67469	3.60638	20.096	4.40162	0.000579701	0.000638914	-0.09139	0.976091	0.74182	0.74182	Total_CL - Total_NoCL	limma	0.000579701	0.000638914	TRUE	enriched hit	5.67469	FALSE	TRUE	TRUE
980	THI7	Q05998	Thiamine transporter OS=Saccharomyces cerevisiae (strain ATCC 204508 / S288c) GN=THI7 PE=1 SV=1	3	1	1	1	6	3	2	5.84585	2.14648	20.3939	4.37927	0.000605457	0.000666621	-0.891202	0.976212	0.74182	0.74182	Total_CL - Total_NoCL	limma	0.000605457	0.000666621	TRUE	enriched hit	5.84585	FALSE	TRUE	TRUE
981	SUR7	P54003	Protein SUR7 OS=Saccharomyces cerevisiae (strain ATCC 204508 / S288c) GN=SUR7 PE=1 SV=1	3	1	1	1	6	3	3	6.64332	2.25976	20.2152	4.37579	0.000609566	0.00067046	-0.903268	0.976231	0.74182	0.74182	Total_CL - Total_NoCL	limma	0.000609566	0.00067046	TRUE	enriched hit	6.64332	FALSE	TRUE	TRUE
982	PMT6	P42934	Dolichyl-phosphate-mannose--protein mannosyltransferase 6 OS=Saccharomyces cerevisiae (strain ATCC 204508 / S288c) GN=PMT6 PE=1 SV=1	3	1	1	1	6	3	4	5.92169	1.97435	20.9283	4.37041	0.000615985	0.00067683	-0.913918	0.97626	0.74182	0.74182	Total_CL - Total_NoCL	limma	0.000615985	0.00067683	TRUE	enriched hit	5.92169	FALSE	TRUE	TRUE
983	DRS2	P39524	Probable phospholipid-transporting ATPase DRS2 OS=Saccharomyces cerevisiae (strain ATCC 204508 / S288c) GN=DRS2 PE=1 SV=2	3	1	1	1	6	3	8	6.10945	2.35235	21.7692	4.27602	0.000740576	0.000812901	-1.10105	0.976773	0.74182	0.74182	Total_CL - Total_NoCL	limma	0.000740576	0.000812901	TRUE	enriched hit	6.10945	FALSE	TRUE	TRUE
984	FYV8	P46949	Protein FYV8 OS=Saccharomyces cerevisiae (strain ATCC 204508 / S288c) GN=FYV8 PE=1 SV=1	3	1	1	1	6	3	13	6.59564	1.92673	24.0158	4.25389	0.000773344	0.000848006	-1.14499	0.976893	0.74182	0.74182	Total_CL - Total_NoCL	limma	0.000773344	0.000848006	TRUE	enriched hit	6.59564	FALSE	TRUE	TRUE
985	TMN3	P40071	Transmembrane 9 superfamily member 3 OS=Saccharomyces cerevisiae (strain ATCC 204508 / S288c) GN=TMN3 PE=1 SV=1	2	NA	1	1	6	2	4	6.05842	1.79043	20.737	4.2182	0.000829376	0.000908524	-0.430904	0.977087	0.74182	0.74182	Total_CL - Total_NoCL	limma	0.000829376	0.000908524	TRUE	enriched hit	6.05842	FALSE	TRUE	TRUE
986	BFR2	Q06631	Protein BFR2 OS=Saccharomyces cerevisiae (strain ATCC 204508 / S288c) GN=BFR2 PE=1 SV=1	2	1	1	NA	6	2	3	5.82817	1.22758	21.42	4.20999	0.000842839	0.000922336	-1.11655	0.977131	0.74182	0.74182	Total_CL - Total_NoCL	limma	0.000842839	0.000922336	TRUE	enriched hit	5.82817	FALSE	TRUE	TRUE
987	ELP2	P42935	Elongator complex protein 2 OS=Saccharomyces cerevisiae (strain ATCC 204508 / S288c) GN=ELP2 PE=1 SV=1	3	1	1	1	6	3	7	6.3045	2.61237	21.9525	4.20177	0.000856552	0.000936392	-1.24865	0.977176	0.74182	0.74182	Total_CL - Total_NoCL	limma	0.000856552	0.000936392	TRUE	enriched hit	6.3045	FALSE	TRUE	TRUE
988	YRF1	P0CX14|P0CX15|P0CX20|P0CX21|P0CX22|P40105|P53819	Y' element ATP-dependent helicase protein 1 copy 1 OS=Saccharomyces cerevisiae (strain ATCC 204508 / S288c) GN=YRF1-1 PE=2 SV=1|Y' element ATP-dependent helicase protein 1 copy 2 OS=Saccharomyces cerevisiae (strain ATCC 204508 / S288c) GN=YRF1-2 PE=2 SV=2|Y' element ATP-dependent helicase protein 1 copy 3 OS=Saccharomyces cerevisiae (strain ATCC 204508 / S288c) GN=YRF1-3 PE=2 SV=1|Y' element ATP-…	2	NA	1	1	6	2	6	5.79582	2.32316	21.7312	4.20056	0.000858575	0.000937654	-0.465535	0.977183	0.74182	0.74182	Total_CL - Total_NoCL	limma	0.000858575	0.000937654	TRUE	enriched hit	5.79582	FALSE	TRUE	TRUE
989	BRR2	P32639	Pre-mRNA-splicing helicase BRR2 OS=Saccharomyces cerevisiae (strain ATCC 204508 / S288c) GN=BRR2 PE=1 SV=2	3	1	1	1	6	3	3	5.60214	2.07655	20.7564	4.18797	0.000880064	0.00096015	-1.27087	0.977251	0.74182	0.74182	Total_CL - Total_NoCL	limma	0.000880064	0.00096015	TRUE	enriched hit	5.60214	FALSE	TRUE	TRUE
990	FPR4	Q06205	FK506-binding protein 4 OS=Saccharomyces cerevisiae (strain ATCC 204508 / S288c) GN=FPR4 PE=1 SV=1	3	1	1	1	6	3	4	6.55025	1.44423	22.078	4.17999	0.000893979	0.000974347	-1.292	0.977294	0.74182	0.74182	Total_CL - Total_NoCL	limma	0.000893979	0.000974347	TRUE	enriched hit	6.55025	FALSE	TRUE	TRUE
991	PHO90	P39535	Low-affinity phosphate transporter PHO90 OS=Saccharomyces cerevisiae (strain ATCC 204508 / S288c) GN=PHO90 PE=1 SV=1	2	1	1	NA	6	2	4	6.10855	1.63359	21.5462	4.1629	0.000924506	0.0010066	-1.19937	0.977387	0.74182	0.74182	Total_CL - Total_NoCL	limma	0.000924506	0.0010066	TRUE	enriched hit	6.10855	FALSE	TRUE	TRUE
992	RPS19A|RPS19B	P07280|P07281	40S ribosomal protein S19-A OS=Saccharomyces cerevisiae (strain ATCC 204508 / S288c) GN=RPS19A PE=1 SV=2|40S ribosomal protein S19-B OS=Saccharomyces cerevisiae (strain ATCC 204508 / S288c) GN=RPS19B PE=1 SV=2	2	NA	1	1	6	2	4	6.42356	4.83444	20.7026	4.13543	0.000975848	0.00106143	-0.587289	0.977536	0.74182	0.74182	Total_CL - Total_NoCL	limma	0.000975848	0.00106143	TRUE	enriched hit	6.42356	FALSE	TRUE	TRUE
993	TAT2	P38967	Tryptophan permease OS=Saccharomyces cerevisiae (strain ATCC 204508 / S288c) GN=TAT2 PE=1 SV=1	2	NA	1	1	5	2	2	5.96586	2.23721	20.4527	4.12697	0.000992237	0.00107817	-0.592884	0.977582	0.74182	0.74182	Total_CL - Total_NoCL	limma	0.000992237	0.00107817	TRUE	enriched hit	5.96586	FALSE	TRUE	TRUE
994	HSP12	P22943	12 kDa heat shock protein OS=Saccharomyces cerevisiae (strain ATCC 204508 / S288c) GN=HSP12 PE=1 SV=1	2	1	1	NA	5	2	2	5.93639	3.68851	20.5695	4.09321	0.0010605	0.00115119	-0.631776	0.977766	0.74182	0.74182	Total_CL - Total_NoCL	limma	0.0010605	0.00115119	TRUE	enriched hit	5.93639	TRUE	TRUE	FALSE
995	LAG1	P38703	Sphingosine N-acyltransferase LAG1 OS=Saccharomyces cerevisiae (strain ATCC 204508 / S288c) GN=LAG1 PE=1 SV=1	3	1	1	1	6	3	5	6.64618	1.59441	23.0809	4.09161	0.00106384	0.00115365	-1.46816	0.977774	0.74182	0.74182	Total_CL - Total_NoCL	limma	0.00106384	0.00115365	TRUE	enriched hit	6.64618	FALSE	TRUE	TRUE
996	LEO1	P38439	RNA polymerase-associated protein LEO1 OS=Saccharomyces cerevisiae (strain ATCC 204508 / S288c) GN=LEO1 PE=1 SV=1	3	1	1	1	6	3	15	7.30294	1.14545	23.2152	4.0901	0.00106702	0.00115594	-1.47118	0.977782	0.74182	0.74182	Total_CL - Total_NoCL	limma	0.00106702	0.00115594	TRUE	enriched hit	7.30294	FALSE	TRUE	TRUE
997	CWH43	P25618	Protein CWH43 OS=Saccharomyces cerevisiae (strain ATCC 204508 / S288c) GN=CWH43 PE=1 SV=2	3	1	1	1	6	3	6	6.78609	1.60834	22.2168	4.07843	0.00109186	0.00118166	-1.47384	0.977846	0.74182	0.74182	Total_CL - Total_NoCL	limma	0.00109186	0.00118166	TRUE	enriched hit	6.78609	FALSE	TRUE	TRUE
998	GUP1	P53154	Glycerol uptake protein 1 OS=Saccharomyces cerevisiae (strain ATCC 204508 / S288c) GN=GUP1 PE=1 SV=1	3	1	1	1	6	3	4	6.24203	2.01938	21.2421	4.07236	0.00110503	0.00119472	-1.50134	0.977879	0.74182	0.74182	Total_CL - Total_NoCL	limma	0.00110503	0.00119472	TRUE	enriched hit	6.24203	FALSE	TRUE	TRUE
999	NHA1	Q99271	Na(+)/H(+) antiporter OS=Saccharomyces cerevisiae (strain ATCC 204508 / S288c) GN=NHA1 PE=1 SV=1	2	1	1	NA	6	2	4	6.26255	1.60091	21.2762	4.06765	0.00111535	0.00120467	-1.39955	0.977904	0.74182	0.74182	Total_CL - Total_NoCL	limma	0.00111535	0.00120467	TRUE	enriched hit	6.26255	FALSE	TRUE	TRUE
1000	UTP10	P42945	U3 small nucleolar RNA-associated protein 10 OS=Saccharomyces cerevisiae (strain ATCC 204508 / S288c) GN=UTP10 PE=1 SV=1	3	1	1	1	6	3	15	6.18328	1.54625	22.3547	4.02231	0.00121986	0.00131623	-1.60655	0.978151	0.74182	0.74182	Total_CL - Total_NoCL	limma	0.00121986	0.00131623	TRUE	enriched hit	6.18328	FALSE	TRUE	TRUE
1001	RQC1	Q05468	Ribosome quality control complex subunit 1 OS=Saccharomyces cerevisiae (strain ATCC 204508 / S288c) GN=RQC1 PE=1 SV=1	2	NA	1	1	6	2	3	5.54689	3.4852	19.8934	4.01776	0.00123089	0.0013268	-0.808037	0.978175	0.74182	0.74182	Total_CL - Total_NoCL	limma	0.00123089	0.0013268	TRUE	enriched hit	5.54689	FALSE	TRUE	TRUE
1002	SKP1	P52286	Suppressor of kinetochore protein 1 OS=Saccharomyces cerevisiae (strain ATCC 204508 / S288c) GN=SKP1 PE=1 SV=2	3	1	1	1	6	3	8	6.75083	1.24916	22.0185	4.01281	0.001243	0.00133852	-1.60485	0.978202	0.74182	0.74182	Total_CL - Total_NoCL	limma	0.001243	0.00133852	TRUE	enriched hit	6.75083	FALSE	TRUE	TRUE
1003	QCR6	P00127	Cytochrome b-c1 complex subunit 6 OS=Saccharomyces cerevisiae (strain ATCC 204508 / S288c) GN=QCR6 PE=1 SV=2	3	1	1	1	6	3	6	7.40478	2.06769	21.8262	3.98155	0.00132233	0.00142253	-1.68275	0.978372	0.74182	0.74182	Total_CL - Total_NoCL	limma	0.00132233	0.00142253	TRUE	enriched hit	7.40478	FALSE	TRUE	TRUE
1004	RAD23	P32628	UV excision repair protein RAD23 OS=Saccharomyces cerevisiae (strain ATCC 204508 / S288c) GN=RAD23 PE=1 SV=1	2	NA	1	1	6	2	4	6.45788	3.98764	21.1631	3.97025	0.00135227	0.00145329	-0.887047	0.978433	0.74182	0.74182	Total_CL - Total_NoCL	limma	0.00135227	0.00145329	TRUE	enriched hit	6.45788	FALSE	TRUE	TRUE
1005	MPP10	P47083	U3 small nucleolar RNA-associated protein MPP10 OS=Saccharomyces cerevisiae (strain ATCC 204508 / S288c) GN=MPP10 PE=1 SV=1	3	1	1	1	6	3	9	6.57894	1.4658	23.1263	3.96814	0.00135795	0.00145794	-1.71485	0.978445	0.74182	0.74182	Total_CL - Total_NoCL	limma	0.00135795	0.00145794	TRUE	enriched hit	6.57894	FALSE	TRUE	TRUE
1006	VMA16	P23968	V-type proton ATPase subunit c'' OS=Saccharomyces cerevisiae (strain ATCC 204508 / S288c) GN=VMA16 PE=1 SV=1	3	1	1	1	6	3	3	6.19819	1.70867	21.6967	3.96752	0.00135961	0.00145827	-1.71608	0.978448	0.74182	0.74182	Total_CL - Total_NoCL	limma	0.00135961	0.00145827	TRUE	enriched hit	6.19819	FALSE	TRUE	TRUE
1007	LYP1	P32487	Lysine-specific permease OS=Saccharomyces cerevisiae (strain ATCC 204508 / S288c) GN=LYP1 PE=1 SV=2	2	NA	1	1	5	2	3	6.23388	2.21312	19.8294	3.94702	0.00141598	0.00151722	-0.929729	0.978559	0.74182	0.74182	Total_CL - Total_NoCL	limma	0.00141598	0.00151722	TRUE	enriched hit	6.23388	FALSE	TRUE	TRUE
1008	NST1	P53935	Stress response protein NST1 OS=Saccharomyces cerevisiae (strain ATCC 204508 / S288c) GN=NST1 PE=1 SV=1	2	NA	1	1	6	2	2	5.62834	2.66457	20.4467	3.92462	0.00148034	0.00158461	-0.983404	0.978681	0.74182	0.74182	Total_CL - Total_NoCL	limma	0.00148034	0.00158461	TRUE	enriched hit	5.62834	FALSE	TRUE	TRUE
1009	MAM3	Q12296	Protein MAM3 OS=Saccharomyces cerevisiae (strain ATCC 204508 / S288c) GN=MAM3 PE=1 SV=1	2	1	1	NA	5	2	2	5.61108	2.70517	19.3773	3.92246	0.00148668	0.00158981	-0.949112	0.978693	0.74182	0.74182	Total_CL - Total_NoCL	limma	0.00148668	0.00158981	TRUE	enriched hit	5.61108	FALSE	TRUE	TRUE
1010	SRO7	Q12038	Lethal(2) giant larvae protein homolog SRO7 OS=Saccharomyces cerevisiae (strain ATCC 204508 / S288c) GN=SRO7 PE=1 SV=1	2	NA	1	1	6	2	5	5.98051	2.94633	21.1569	3.91323	0.00151418	0.00161763	-1.00488	0.978743	0.74182	0.74182	Total_CL - Total_NoCL	limma	0.00151418	0.00161763	TRUE	enriched hit	5.98051	FALSE	TRUE	TRUE
1011	POB3	Q04636	FACT complex subunit POB3 OS=Saccharomyces cerevisiae (strain ATCC 204508 / S288c) GN=POB3 PE=1 SV=1	3	1	1	1	6	3	3	6.0508	1.59691	21.1177	3.8608	0.00168041	0.00179343	-1.86436	0.979028	0.74182	0.74182	Total_CL - Total_NoCL	limma	0.00168041	0.00179343	TRUE	enriched hit	6.0508	TRUE	TRUE	FALSE
1012	RAS1	P01119	Ras-like protein 1 OS=Saccharomyces cerevisiae (strain ATCC 204508 / S288c) GN=RAS1 PE=1 SV=2	2	NA	1	1	5	2	3	5.94424	2.67426	20.2798	3.84508	0.00173376	0.00184854	-1.04499	0.979113	0.74182	0.74182	Total_CL - Total_NoCL	limma	0.00173376	0.00184854	TRUE	enriched hit	5.94424	TRUE	TRUE	FALSE
1013	PYC1	P11154	Pyruvate carboxylase 1 OS=Saccharomyces cerevisiae (strain ATCC 204508 / S288c) GN=PYC1 PE=1 SV=2	2	NA	1	1	6	2	3	5.91936	3.30251	20.3841	3.81188	0.00185223	0.0019729	-1.19535	0.979293	0.74182	0.74182	Total_CL - Total_NoCL	limma	0.00185223	0.0019729	TRUE	enriched hit	5.91936	FALSE	TRUE	TRUE
1014	SVP26	P38869	Protein SVP26 OS=Saccharomyces cerevisiae (strain ATCC 204508 / S288c) GN=SVP26 PE=1 SV=1	2	NA	1	1	6	2	2	6.19893	2.56657	20.949	3.79788	0.00190459	0.00202668	-1.22271	0.979369	0.74182	0.74182	Total_CL - Total_NoCL	limma	0.00190459	0.00202668	TRUE	enriched hit	6.19893	FALSE	TRUE	TRUE
1015	BAR1	P12630	Barrierpepsin OS=Saccharomyces cerevisiae (strain ATCC 204508 / S288c) GN=BAR1 PE=1 SV=1	3	1	1	1	6	3	5	6.83176	1.93908	21.4865	3.73275	0.00216868	0.00230542	-2.18617	0.979723	0.74182	0.74182	Total_CL - Total_NoCL	limma	0.00216868	0.00230542	TRUE	enriched hit	6.83176	TRUE	TRUE	FALSE
1016	TPO3	Q06451	Polyamine transporter 3 OS=Saccharomyces cerevisiae (strain ATCC 204508 / S288c) GN=TPO3 PE=1 SV=1	3	1	1	1	6	3	4	6.12833	2.0604	20.8718	3.71333	0.00225436	0.00239415	-2.21974	0.979829	0.74182	0.74182	Total_CL - Total_NoCL	limma	0.00225436	0.00239415	TRUE	enriched hit	6.12833	FALSE	TRUE	TRUE
1017	PRM5	P40476	Pheromone-regulated membrane protein 5 OS=Saccharomyces cerevisiae (strain ATCC 204508 / S288c) GN=PRM5 PE=1 SV=1	3	1	1	1	6	3	5	6.48782	1.37344	22.5529	3.70718	0.00228221	0.00242134	-2.23738	0.979862	0.74182	0.74182	Total_CL - Total_NoCL	limma	0.00228221	0.00242134	TRUE	enriched hit	6.48782	FALSE	TRUE	TRUE
1018	MRPL13	Q02204	54S ribosomal protein L13, mitochondrial OS=Saccharomyces cerevisiae (strain ATCC 204508 / S288c) GN=MRPL13 PE=1 SV=2	2	NA	1	1	5	2	2	5.98553	4.62812	20.6232	3.66369	0.00248936	0.00263853	-1.45117	0.980098	0.74182	0.74182	Total_CL - Total_NoCL	limma	0.00248936	0.00263853	TRUE	enriched hit	5.98553	FALSE	TRUE	TRUE
1019	ARE2	P53629	Sterol O-acyltransferase 2 OS=Saccharomyces cerevisiae (strain ATCC 204508 / S288c) GN=ARE2 PE=1 SV=1	3	1	1	1	6	3	5	6.2535	1.63216	21.4359	3.641	0.00260484	0.00275822	-2.36995	0.980221	0.74182	0.74182	Total_CL - Total_NoCL	limma	0.00260484	0.00275822	TRUE	enriched hit	6.2535	TRUE	TRUE	FALSE
1020	PHO5	P00635	Repressible acid phosphatase OS=Saccharomyces cerevisiae (strain ATCC 204508 / S288c) GN=PHO5 PE=1 SV=2	3	1	1	1	6	3	3	6.71867	1.11237	22.461	3.587	0.00290198	0.00306984	-2.47806	0.980515	0.74182	0.74182	Total_CL - Total_NoCL	limma	0.00290198	0.00306984	TRUE	enriched hit	6.71867	FALSE	TRUE	TRUE
1021	YCR061W	P25639	Uncharacterized membrane protein YCR061W OS=Saccharomyces cerevisiae (strain ATCC 204508 / S288c) GN=YCR061W PE=1 SV=2	2	NA	1	1	4	2	3	5.88734	2.52894	21.259	3.58163	0.00293335	0.00309999	-1.60654	0.980544	0.74182	0.74182	Total_CL - Total_NoCL	limma	0.00293335	0.00309999	TRUE	enriched hit	5.88734	FALSE	TRUE	TRUE
1022	CIS3	P47001	Cell wall mannoprotein CIS3 OS=Saccharomyces cerevisiae (strain ATCC 204508 / S288c) GN=CIS3 PE=1 SV=1	3	1	1	1	6	3	3	7.00403	1.22135	22.6992	3.52899	0.00325932	0.0034411	-2.59412	0.98083	0.74182	0.74182	Total_CL - Total_NoCL	limma	0.00325932	0.0034411	TRUE	enriched hit	7.00403	FALSE	TRUE	TRUE
1023	APE3	P37302	Aminopeptidase Y OS=Saccharomyces cerevisiae (strain ATCC 204508 / S288c) GN=APE3 PE=1 SV=1	3	1	1	1	6	3	16	8.20696	1.09262	25.2728	3.52026	0.00331685	0.00349842	-2.61159	0.980877	0.74182	0.74182	Total_CL - Total_NoCL	limma	0.00331685	0.00349842	TRUE	enriched hit	8.20696	FALSE	TRUE	TRUE
1024	OAC1	P32332	Mitochondrial oxaloacetate transport protein OS=Saccharomyces cerevisiae (strain ATCC 204508 / S288c) GN=OAC1 PE=1 SV=1	2	NA	1	1	6	2	2	5.76504	2.34691	19.8761	3.47208	0.00365295	0.00384915	-1.83869	0.981139	0.74182	0.74182	Total_CL - Total_NoCL	limma	0.00365295	0.00384915	TRUE	enriched hit	5.76504	FALSE	TRUE	TRUE
1025	LEM3	P42838	Alkylphosphocholine resistance protein LEM3 OS=Saccharomyces cerevisiae (strain ATCC 204508 / S288c) GN=LEM3 PE=1 SV=1	3	1	1	1	6	3	5	5.71955	2.10027	20.262	3.46882	0.00367691	0.00387062	-2.71439	0.981157	0.74182	0.74182	Total_CL - Total_NoCL	limma	0.00367691	0.00387062	TRUE	enriched hit	5.71955	FALSE	TRUE	TRUE
1026	MAK16	P10962	Protein MAK16 OS=Saccharomyces cerevisiae (strain ATCC 204508 / S288c) GN=MAK16 PE=1 SV=2	3	1	1	1	6	3	2	6.33151	1.31074	21.746	3.46509	0.0037045	0.00389587	-2.72184	0.981177	0.74182	0.74182	Total_CL - Total_NoCL	limma	0.0037045	0.00389587	TRUE	enriched hit	6.33151	FALSE	TRUE	TRUE
1027	RDH54	P38086	DNA repair and recombination protein RDH54 OS=Saccharomyces cerevisiae (strain ATCC 204508 / S288c) GN=RDH54 PE=1 SV=4	2	1	1	NA	6	2	2	5.85591	3.52552	20.359	3.4351	0.003934	0.00413319	-2.4119	0.98134	0.74182	0.74182	Total_CL - Total_NoCL	limma	0.003934	0.00413319	TRUE	enriched hit	5.85591	FALSE	TRUE	TRUE
1028	VPH1	P32563	V-type proton ATPase subunit a, vacuolar isoform OS=Saccharomyces cerevisiae (strain ATCC 204508 / S288c) GN=VPH1 PE=1 SV=3	3	1	1	1	6	3	17	7.16453	1.8392	23.6681	3.4256	0.00400965	0.00420857	-2.80068	0.981391	0.74182	0.74182	Total_CL - Total_NoCL	limma	0.00400965	0.00420857	TRUE	enriched hit	7.16453	FALSE	TRUE	TRUE
1029	REB1	P21538	DNA-binding protein REB1 OS=Saccharomyces cerevisiae (strain ATCC 204508 / S288c) GN=REB1 PE=1 SV=2	2	1	1	NA	6	2	2	5.74317	1.54339	19.656	3.40104	0.00421202	0.00441669	-2.73018	0.981525	0.74182	0.74182	Total_CL - Total_NoCL	limma	0.00421202	0.00441669	TRUE	enriched hit	5.74317	FALSE	TRUE	TRUE
1030	NAM8	Q00539	Protein NAM8 OS=Saccharomyces cerevisiae (strain ATCC 204508 / S288c) GN=NAM8 PE=1 SV=2	2	NA	1	1	5	2	3	5.7129	3.74739	19.3998	3.39344	0.00427662	0.00448007	-1.97379	0.981566	0.74182	0.74182	Total_CL - Total_NoCL	limma	0.00427662	0.00448007	TRUE	enriched hit	5.7129	FALSE	TRUE	TRUE
1031	KXD1	P53158	Biogenesis of lysosome-related organelles complex 1 subunit KXD1 OS=Saccharomyces cerevisiae (strain ATCC 204508 / S288c) GN=KXD1 PE=1 SV=1	3	1	1	1	6	3	4	5.97104	1.80737	21.1869	3.37522	0.00443577	0.00464229	-2.90113	0.981665	0.74182	0.74182	Total_CL - Total_NoCL	limma	0.00443577	0.00464229	TRUE	enriched hit	5.97104	FALSE	TRUE	TRUE
1032	UTP14	Q04500	U3 small nucleolar RNA-associated protein 14 OS=Saccharomyces cerevisiae (strain ATCC 204508 / S288c) GN=UTP14 PE=1 SV=1	3	1	1	1	6	3	10	6.97433	1.49074	24.2814	3.37003	0.0044822	0.00468633	-2.91148	0.981693	0.74182	0.74182	Total_CL - Total_NoCL	limma	0.0044822	0.00468633	TRUE	enriched hit	6.97433	FALSE	TRUE	TRUE
1033	SHR3	Q02774	Secretory component protein SHR3 OS=Saccharomyces cerevisiae (strain ATCC 204508 / S288c) GN=SHR3 PE=1 SV=2	2	NA	1	1	6	2	3	6.93034	1.9508	21.6503	3.33528	0.00480561	0.00501961	-2.09755	0.981882	0.74182	0.74182	Total_CL - Total_NoCL	limma	0.00480561	0.00501961	TRUE	enriched hit	6.93034	FALSE	TRUE	TRUE
1034	TRM2	P33753	tRNA (uracil(54)-C(5))-methyltransferase OS=Saccharomyces cerevisiae (strain ATCC 204508 / S288c) GN=TRM2 PE=1 SV=2	3	1	1	1	6	3	18	7.18718	1.40165	24.3256	3.32659	0.00489003	0.00510285	-2.99795	0.981929	0.74182	0.74182	Total_CL - Total_NoCL	limma	0.00489003	0.00510285	TRUE	enriched hit	7.18718	FALSE	TRUE	TRUE
1035	POL2	P21951	DNA polymerase epsilon catalytic subunit A OS=Saccharomyces cerevisiae (strain ATCC 204508 / S288c) GN=POL2 PE=1 SV=1	2	NA	1	1	6	2	2	5.45768	3.20695	19.2953	3.3117	0.00503828	0.00525246	-2.14052	0.98201	0.74182	0.74182	Total_CL - Total_NoCL	limma	0.00503828	0.00525246	TRUE	enriched hit	5.45768	FALSE	TRUE	TRUE
1036	IRA2	P19158	Inhibitory regulator protein IRA2 OS=Saccharomyces cerevisiae (strain ATCC 204508 / S288c) GN=IRA2 PE=1 SV=2	2	NA	1	1	6	2	2	5.58979	2.36254	19.6899	3.2915	0.00524652	0.00546428	-2.17866	0.98212	0.74182	0.74182	Total_CL - Total_NoCL	limma	0.00524652	0.00546428	TRUE	enriched hit	5.58979	FALSE	TRUE	TRUE
1037	NPC2	Q12408	Phosphatidylglycerol/phosphatidylinositol transfer protein OS=Saccharomyces cerevisiae (strain ATCC 204508 / S288c) GN=NPC2 PE=1 SV=1	2	NA	1	1	6	2	2	5.86119	2.96281	19.2743	3.2643	0.00554051	0.00576491	-2.23271	0.982267	0.74182	0.74182	Total_CL - Total_NoCL	limma	0.00554051	0.00576491	TRUE	enriched hit	5.86119	FALSE	TRUE	TRUE
1038	PHO3	P24031	Constitutive acid phosphatase OS=Saccharomyces cerevisiae (strain ATCC 204508 / S288c) GN=PHO3 PE=1 SV=2	3	1	1	1	6	3	8	7.4871	0.793914	24.8816	3.26146	0.0055721	0.00579219	-3.12735	0.982283	0.74182	0.74182	Total_CL - Total_NoCL	limma	0.0055721	0.00579219	FALSE	enriched candidate	7.4871	FALSE	FALSE	FALSE
1039	PBP2	P38151	PAB1-binding protein 2 OS=Saccharomyces cerevisiae (strain ATCC 204508 / S288c) GN=PBP2 PE=1 SV=1	2	1	1	NA	5	2	2	5.66861	4.44259	19.6996	3.25973	0.00559146	0.00580672	-2.18836	0.982292	0.74182	0.74182	Total_CL - Total_NoCL	limma	0.00559146	0.00580672	TRUE	enriched hit	5.66861	FALSE	TRUE	TRUE
1040	CLC1	P17891	Clathrin light chain OS=Saccharomyces cerevisiae (strain ATCC 204508 / S288c) GN=CLC1 PE=1 SV=1	3	1	1	1	6	3	11	7.48619	1.91274	23.6026	3.22687	0.00597217	0.00619475	-3.19594	0.982471	0.74182	0.74182	Total_CL - Total_NoCL	limma	0.00597217	0.00619475	TRUE	enriched hit	7.48619	TRUE	TRUE	FALSE
1041	LAA1	P39526	AP-1 accessory protein LAA1 OS=Saccharomyces cerevisiae (strain ATCC 204508 / S288c) GN=LAA1 PE=1 SV=1	2	NA	1	1	6	2	6	6.16321	2.01509	21.6329	3.2265	0.00597659	0.00619475	-2.30399	0.982473	0.74182	0.74182	Total_CL - Total_NoCL	limma	0.00597659	0.00619475	TRUE	enriched hit	6.16321	FALSE	TRUE	TRUE
1042	RPF2	P36160	Ribosome biogenesis protein RPF2 OS=Saccharomyces cerevisiae (strain ATCC 204508 / S288c) GN=RPF2 PE=1 SV=1	2	1	1	NA	4	2	2	6.21073	2.2517	21.2391	3.21005	0.00617679	0.00639612	-2.27816	0.982562	0.74182	0.74182	Total_CL - Total_NoCL	limma	0.00617679	0.00639612	TRUE	enriched hit	6.21073	FALSE	TRUE	TRUE
1043	ARE1	P25628	Sterol O-acyltransferase 1 OS=Saccharomyces cerevisiae (strain ATCC 204508 / S288c) GN=ARE1 PE=1 SV=1	2	NA	1	1	6	2	2	5.88806	2.33846	21.1216	3.19179	0.00640703	0.00662818	-2.36937	0.982661	0.74182	0.74182	Total_CL - Total_NoCL	limma	0.00640703	0.00662818	TRUE	enriched hit	5.88806	FALSE	TRUE	TRUE
1044	RIX1	P38883	Pre-rRNA-processing protein RIX1 OS=Saccharomyces cerevisiae (strain ATCC 204508 / S288c) GN=RIX1 PE=1 SV=2	2	NA	1	1	6	2	2	5.77309	4.31095	19.4677	3.16932	0.00670197	0.00692665	-2.41048	0.982783	0.74182	0.74182	Total_CL - Total_NoCL	limma	0.00670197	0.00692665	TRUE	enriched hit	5.77309	FALSE	TRUE	TRUE
1045	SQS1	P53866	Protein SQS1 OS=Saccharomyces cerevisiae (strain ATCC 204508 / S288c) GN=SQS1 PE=1 SV=1	2	NA	1	1	6	2	3	5.78034	3.64673	20.4727	3.12632	0.00730441	0.00754207	-2.49244	0.983017	0.74182	0.74182	Total_CL - Total_NoCL	limma	0.00730441	0.00754207	TRUE	enriched hit	5.78034	FALSE	TRUE	TRUE
1046	ATP6	P00854	ATP synthase subunit a OS=Saccharomyces cerevisiae (strain ATCC 204508 / S288c) GN=ATP6 PE=1 SV=2	2	NA	1	1	5	2	2	6.63368	2.08685	20.8065	3.04934	0.00852015	0.00878895	-2.61996	0.983435	0.74182	0.74182	Total_CL - Total_NoCL	limma	0.00852015	0.00878895	TRUE	enriched hit	6.63368	FALSE	TRUE	TRUE
1047	IRR1	P40541	Cohesin subunit SCC3 OS=Saccharomyces cerevisiae (strain ATCC 204508 / S288c) GN=IRR1 PE=1 SV=1	2	1	1	NA	6	2	2	5.60058	1.55427	20.1403	3.02411	0.00896051	0.00923438	-3.46324	0.983572	0.74182	0.74182	Total_CL - Total_NoCL	limma	0.00896051	0.00923438	TRUE	enriched hit	5.60058	FALSE	TRUE	TRUE
1048	PSH1	Q12161	RING finger protein PSH1 OS=Saccharomyces cerevisiae (strain ATCC 204508 / S288c) GN=PSH1 PE=1 SV=1	2	1	1	NA	6	2	3	6.02104	0.808322	21.6478	3.00834	0.0092472	0.00952073	-3.50527	0.983658	0.74182	0.74182	Total_CL - Total_NoCL	limma	0.0092472	0.00952073	FALSE	enriched candidate	6.02104	FALSE	FALSE	FALSE
1049	YPT52	P36018	GTP-binding protein YPT52 OS=Saccharomyces cerevisiae (strain ATCC 204508 / S288c) GN=YPT52 PE=1 SV=1	2	1	1	NA	5	2	4	6.02292	2.69217	20.4271	2.9481	0.0104275	0.0107257	-2.76627	0.983985	0.74182	0.74182	Total_CL - Total_NoCL	limma	0.0104275	0.0107257	TRUE	enriched hit	6.02292	TRUE	TRUE	FALSE
1050	CSG2	P35206	Mannosyl phosphorylinositol ceramide synthase regulatory protein CSG2 OS=Saccharomyces cerevisiae (strain ATCC 204508 / S288c) GN=CSG2 PE=1 SV=2	2	NA	1	1	6	2	3	6.21891	2.33636	20.0189	2.94105	0.010575	0.0108671	-2.83548	0.984023	0.74182	0.74182	Total_CL - Total_NoCL	limma	0.010575	0.0108671	TRUE	enriched hit	6.21891	FALSE	TRUE	TRUE
1051	PSY4	P38193	Serine/threonine-protein phosphatase 4 regulatory subunit 2 OS=Saccharomyces cerevisiae (strain ATCC 204508 / S288c) GN=PSY4 PE=1 SV=1	2	1	1	NA	6	2	2	5.64622	1.29307	20.5696	2.84273	0.0128583	0.0132008	-3.82643	0.984557	0.74182	0.74182	Total_CL - Total_NoCL	limma	0.0128583	0.0132008	TRUE	enriched hit	5.64622	FALSE	TRUE	TRUE
1052	ARP8	Q12386	Actin-like protein ARP8 OS=Saccharomyces cerevisiae (strain ATCC 204508 / S288c) GN=ARP8 PE=1 SV=1	2	1	1	NA	6	2	8	6.68405	1.32991	22.7581	2.77719	0.0146415	0.0150173	-3.95222	0.984913	0.74182	0.74182	Total_CL - Total_NoCL	limma	0.0146415	0.0150173	TRUE	enriched hit	6.68405	FALSE	TRUE	TRUE
1053	HHT1	P61830	Histone H3 OS=Saccharomyces cerevisiae (strain ATCC 204508 / S288c) GN=HHT1 PE=1 SV=2	3	1	1	1	6	3	4	6.9375	1.2176	23.6269	2.68506	0.017561	0.0179946	-4.24972	0.985414	0.74182	0.74182	Total_CL - Total_NoCL	limma	0.017561	0.0179946	TRUE	enriched hit	6.9375	FALSE	TRUE	TRUE
1054	SMF1	P38925	Manganese transporter SMF1 OS=Saccharomyces cerevisiae (strain ATCC 204508 / S288c) GN=SMF1 PE=1 SV=2	2	NA	1	1	6	2	3	5.90111	2.02586	20.4014	2.573	0.0218771	0.022396	-3.51111	0.986022	0.74182	0.74182	Total_CL - Total_NoCL	limma	0.0218771	0.022396	TRUE	enriched hit	5.90111	FALSE	TRUE	TRUE
1055	YGP1	P38616	Protein YGP1 OS=Saccharomyces cerevisiae (strain ATCC 204508 / S288c) GN=YGP1 PE=1 SV=2	3	1	1	1	6	3	7	7.7566	0.679653	24.5089	2.55098	0.0228381	0.0233576	-4.50181	0.986142	0.74182	0.74182	Total_CL - Total_NoCL	limma	0.0228381	0.0233576	FALSE	enriched candidate	7.7566	TRUE	FALSE	FALSE
1056	RPT5	P33297	26S protease regulatory subunit 6A OS=Saccharomyces cerevisiae (strain ATCC 204508 / S288c) GN=RPT5 PE=1 SV=3	2	NA	1	1	6	2	2	5.39337	3.08756	18.9098	2.47402	0.0265246	0.0271023	-3.66843	0.98656	0.74182	0.74182	Total_CL - Total_NoCL	limma	0.0265246	0.0271023	TRUE	enriched hit	5.39337	FALSE	TRUE	TRUE
1057	MMF1	P40185	Protein MMF1, mitochondrial OS=Saccharomyces cerevisiae (strain ATCC 204508 / S288c) GN=MMF1 PE=1 SV=1	2	1	NA	1	4	2	3	5.84679	1.54096	21.2041	2.46298	0.0270979	0.027662	-3.6366	0.98662	0.74182	0.74182	Total_CL - Total_NoCL	limma	0.0270979	0.027662	TRUE	enriched hit	5.84679	TRUE	TRUE	FALSE
1058	STV1	P37296	V-type proton ATPase subunit a, Golgi isoform OS=Saccharomyces cerevisiae (strain ATCC 204508 / S288c) GN=STV1 PE=1 SV=2	2	NA	1	1	6	2	3	5.81796	1.96334	20.9733	2.37474	0.0321247	0.0327624	-3.86123	0.987099	0.74182	0.74182	Total_CL - Total_NoCL	limma	0.0321247	0.0327624	TRUE	enriched hit	5.81796	FALSE	TRUE	TRUE
1059	HTA1|HTA2	P04911|P04912	Histone H2A.1 OS=Saccharomyces cerevisiae (strain ATCC 204508 / S288c) GN=HTA1 PE=1 SV=2|Histone H2A.2 OS=Saccharomyces cerevisiae (strain ATCC 204508 / S288c) GN=HTA2 PE=1 SV=2	2	NA	1	1	6	2	2	6.27351	1.58925	22.5081	2.36168	0.0329399	0.033562	-3.88391	0.98717	0.74182	0.74182	Total_CL - Total_NoCL	limma	0.0329399	0.033562	TRUE	enriched hit	6.27351	FALSE	TRUE	TRUE
1060	FLC2	P39719	Flavin carrier protein 2 OS=Saccharomyces cerevisiae (strain ATCC 204508 / S288c) GN=FLC2 PE=1 SV=2	3	1	1	1	6	3	5	6.43068	1.15415	22.2143	2.34663	0.0339041	0.0345118	-4.87643	0.987252	0.74182	0.74182	Total_CL - Total_NoCL	limma	0.0339041	0.0345118	TRUE	enriched hit	6.43068	FALSE	TRUE	TRUE
1061	ASF1	P32447	Histone chaperone ASF1 OS=Saccharomyces cerevisiae (strain ATCC 204508 / S288c) GN=ASF1 PE=1 SV=1	3	1	1	1	6	3	10	7.59178	0.562953	23.6986	2.16241	0.0480693	0.0488848	-5.20213	0.988253	0.74182	0.74182	Total_CL - Total_NoCL	limma	0.0480693	0.0488848	FALSE	no hit	7.59178	FALSE	FALSE	FALSE
1062	SSA4	P22202	Heat shock protein SSA4 OS=Saccharomyces cerevisiae (strain ATCC 204508 / S288c) GN=SSA4 PE=1 SV=3	3	1	1	1	6	3	2	6.09851	1.23665	20.8617	2.15946	0.048336	0.0491097	-5.20724	0.988269	0.74182	0.74182	Total_CL - Total_NoCL	limma	0.048336	0.0491097	TRUE	enriched hit	6.09851	FALSE	TRUE	TRUE
1063	RSA3	Q05942	Ribosome assembly protein 3 OS=Saccharomyces cerevisiae (strain ATCC 204508 / S288c) GN=RSA3 PE=1 SV=1	3	1	1	1	6	3	6	6.88751	0.92182	23.9703	2.14602	0.0495673	0.0503134	-5.23048	0.988342	0.74182	0.74182	Total_CL - Total_NoCL	limma	0.0495673	0.0503134	FALSE	enriched candidate	6.88751	FALSE	FALSE	FALSE
1064	GPI11	Q06636	Glycosylphosphatidylinositol anchor biosynthesis protein 11 OS=Saccharomyces cerevisiae (strain ATCC 204508 / S288c) GN=GPI11 PE=1 SV=1	3	1	1	1	6	3	2	6.1897	1.16675	20.7139	2.0711	0.0569797	0.057783	-5.35864	0.988749	0.74182	0.74182	Total_CL - Total_NoCL	limma	0.0569797	0.057783	FALSE	enriched candidate	6.1897	FALSE	FALSE	FALSE
1065	RNY1	Q02933	Ribonuclease T2-like OS=Saccharomyces cerevisiae (strain ATCC 204508 / S288c) GN=RNY1 PE=1 SV=1	3	1	1	1	6	3	5	6.08136	0.816775	21.8547	2.01561	0.0631137	0.0639434	-5.45199	0.98905	0.74182	0.74182	Total_CL - Total_NoCL	limma	0.0631137	0.0639434	FALSE	enriched candidate	6.08136	FALSE	FALSE	FALSE
1066	SHE2	P36068	SWI5-dependent HO expression protein 2 OS=Saccharomyces cerevisiae (strain ATCC 204508 / S288c) GN=SHE2 PE=1 SV=1	2	1	1	NA	4	2	2	5.50275	1.67879	21.0454	2.01419	0.0632784	0.0640501	-4.38769	0.989058	0.74182	0.74182	Total_CL - Total_NoCL	limma	0.0632784	0.0640501	FALSE	enriched candidate	5.50275	FALSE	FALSE	FALSE
1067	INO80	P53115	Putative DNA helicase INO80 OS=Saccharomyces cerevisiae (strain ATCC 204508 / S288c) GN=INO80 PE=1 SV=1	2	NA	1	1	6	2	4	5.67221	2.25194	20.7302	1.98392	0.0668824	0.0676345	-4.51442	0.989222	0.74182	0.74182	Total_CL - Total_NoCL	limma	0.0668824	0.0676345	FALSE	enriched candidate	5.67221	FALSE	FALSE	FALSE
1068	UBP12	P39538	Ubiquitin carboxyl-terminal hydrolase 12 OS=Saccharomyces cerevisiae (strain ATCC 204508 / S288c) GN=UBP12 PE=1 SV=1	3	1	1	1	6	3	8	5.78047	1.0835	21.2683	1.97094	0.0684845	0.0691898	-5.52056	0.989293	0.74182	0.74182	Total_CL - Total_NoCL	limma	0.0684845	0.0691898	FALSE	enriched candidate	5.78047	FALSE	FALSE	FALSE
1069	NSR1	P27476	Nuclear localization sequence-binding protein OS=Saccharomyces cerevisiae (strain ATCC 204508 / S288c) GN=NSR1 PE=1 SV=1	3	1	1	1	6	3	25	8.42451	0.509506	25.5071	1.92386	0.0745917	0.0752894	-5.60321	0.989548	0.74182	0.74182	Total_CL - Total_NoCL	limma	0.0745917	0.0752894	FALSE	no hit	8.42451	FALSE	FALSE	FALSE
1070	FTH1	P38310	Iron transporter FTH1 OS=Saccharomyces cerevisiae (strain ATCC 204508 / S288c) GN=FTH1 PE=1 SV=2	2	NA	1	1	6	2	3	6.06851	1.86062	20.1814	1.85232	0.0848185	0.0855319	-4.71875	0.989937	0.74182	0.74182	Total_CL - Total_NoCL	limma	0.0848185	0.0855319	FALSE	enriched candidate	6.06851	FALSE	FALSE	FALSE
1071	TPO1	Q07824	Polyamine transporter 1 OS=Saccharomyces cerevisiae (strain ATCC 204508 / S288c) GN=TPO1 PE=1 SV=1	2	NA	1	1	6	2	3	6.60155	1.54408	21.8327	1.77283	0.0976367	0.0983661	-4.8406	0.990369	0.74182	0.74182	Total_CL - Total_NoCL	limma	0.0976367	0.0983661	FALSE	enriched candidate	6.60155	FALSE	FALSE	FALSE
1072	CSI2	Q08054	Chitin synthase 3 complex protein CSI2 OS=Saccharomyces cerevisiae (strain ATCC 204508 / S288c) GN=CSI2 PE=1 SV=1	3	1	1	1	6	3	3	6.572	0.434224	22.8798	1.70671	0.109575	0.110291	-5.94395	0.990728	0.74182	1	Total_CL - Total_NoCL	limma	0.109575	0.110291	FALSE	no hit	6.572	FALSE	FALSE	FALSE
1073	RAI1	P53063	Decapping nuclease RAI1 OS=Saccharomyces cerevisiae (strain ATCC 204508 / S288c) GN=RAI1 PE=1 SV=3	2	1	1	NA	4	2	2	5.4112	1.28008	20.7802	1.44431	0.170289	0.171241	-5.21505	0.992154	0.742095	1	Total_CL - Total_NoCL	limma	0.170289	0.171241	FALSE	enriched candidate	5.4112	FALSE	FALSE	FALSE
1074	SRP40	P32583	Suppressor protein SRP40 OS=Saccharomyces cerevisiae (strain ATCC 204508 / S288c) GN=SRP40 PE=1 SV=2	3	1	1	1	6	3	9	7.90454	0.797935	23.9839	1.17417	0.259588	0.260797	-6.65465	0.993621	0.742378	1	Total_CL - Total_NoCL	limma	0.259588	0.260797	FALSE	no hit	7.90454	FALSE	FALSE	FALSE
1075	CHZ1	P40019	Histone H2A.Z-specific chaperone CHZ1 OS=Saccharomyces cerevisiae (strain ATCC 204508 / S288c) GN=CHZ1 PE=1 SV=2	3	1	1	1	6	3	9	6.69654	0.665934	23.258	1.16804	0.261974	0.262949	-6.65601	0.993654	0.742384	1	Total_CL - Total_NoCL	limma	0.261974	0.262949	FALSE	no hit	6.69654	FALSE	FALSE	FALSE
1076	PST1	Q12355	Cell wall mannoprotein PST1 OS=Saccharomyces cerevisiae (strain ATCC 204508 / S288c) GN=PST1 PE=1 SV=1	3	1	1	1	6	3	5	7.00931	0.394848	23.7485	1.07769	0.299087	0.299921	-6.76093	0.994145	0.742479	1	Total_CL - Total_NoCL	limma	0.299087	0.299921	FALSE	no hit	7.00931	FALSE	FALSE	FALSE
1077	HSP150	P32478	Cell wall mannoprotein HSP150 OS=Saccharomyces cerevisiae (strain ATCC 204508 / S288c) GN=HSP150 PE=1 SV=2	3	1	1	1	6	3	2	6.24422	0.444982	21.4239	0.984612	0.341247	0.341881	-6.85609	0.994651	0.742576	1	Total_CL - Total_NoCL	limma	0.341247	0.341881	FALSE	no hit	6.24422	FALSE	FALSE	FALSE
1078	LSC1	P53598	Succinyl-CoA ligase [ADP-forming] subunit alpha, mitochondrial OS=Saccharomyces cerevisiae (strain ATCC 204508 / S288c) GN=LSC1 PE=1 SV=1	2	1	1	NA	4	2	2	5.70667	0.837803	20.8038	0.961355	0.352413	0.352739	-5.75324	0.994777	0.7426	1	Total_CL - Total_NoCL	limma	0.352413	0.352739	FALSE	no hit	5.70667	TRUE	FALSE	FALSE
1079	MRP8	P35719	Uncharacterized protein MRP8 OS=Saccharomyces cerevisiae (strain ATCC 204508 / S288c) GN=MRP8 PE=1 SV=1	2	1	1	NA	4	2	2	5.58589	-0.099189	21.2282	-0.0827841	0.935176	0.935176	-6.21104	0.99955	0.743514	1	Total_CL - Total_NoCL	limma	0.935176	0.935176	FALSE	no hit	5.58589	FALSE	FALSE	FALSE
1080	RPL20A|RPL20B	P0CX23|P0CX24	60S ribosomal protein L20-A OS=Saccharomyces cerevisiae (strain ATCC 204508 / S288c) GN=RPL20A PE=1 SV=1|60S ribosomal protein L20-B OS=Saccharomyces cerevisiae (strain ATCC 204508 / S288c) GN=RPL20B PE=1 SV=1	3	1	1	1	6	3	11	8.25025	6.15826	23.9729	32.9301	7.59456e-15	8.19454e-12	23.764	0.947753	1	1	Long_CL - Long_NoCL	limma	7.59456e-15	8.19454e-12	TRUE	enriched hit	8.25025	FALSE	TRUE	TRUE
1081	RPL2A|RPL2B	P0CX45|P0CX46	60S ribosomal protein L2-A OS=Saccharomyces cerevisiae (strain ATCC 204508 / S288c) GN=RPL2A PE=1 SV=1|60S ribosomal protein L2-B OS=Saccharomyces cerevisiae (strain ATCC 204508 / S288c) GN=RPL2B PE=1 SV=1	3	1	1	1	6	3	21	9.00207	5.50736	24.6778	28.632	5.41364e-14	2.0289e-11	22.1034	0.954564	1	1	Long_CL - Long_NoCL	limma	5.41364e-14	2.0289e-11	TRUE	enriched hit	9.00207	FALSE	TRUE	TRUE
1082	RPS18A|RPS18B	P0CX55|P0CX56	40S ribosomal protein S18-A OS=Saccharomyces cerevisiae (strain ATCC 204508 / S288c) GN=RPS18A PE=1 SV=1|40S ribosomal protein S18-B OS=Saccharomyces cerevisiae (strain ATCC 204508 / S288c) GN=RPS18B PE=1 SV=1	3	1	1	1	6	3	9	7.43269	4.47635	23.1172	28.2363	6.57922e-14	2.0289e-11	21.9335	0.955192	1	1	Long_CL - Long_NoCL	limma	6.57922e-14	2.0289e-11	TRUE	enriched hit	7.43269	TRUE	TRUE	FALSE
1083	RPS20	P38701	40S ribosomal protein S20 OS=Saccharomyces cerevisiae (strain ATCC 204508 / S288c) GN=RPS20 PE=1 SV=3	3	1	1	1	6	3	7	7.62585	6.49163	22.2424	27.9677	7.5214e-14	2.0289e-11	21.7775	0.955617	1	1	Long_CL - Long_NoCL	limma	7.5214e-14	2.0289e-11	TRUE	enriched hit	7.62585	TRUE	TRUE	FALSE
1084	RPS24A|RPS24B	P0CX31|P0CX32	40S ribosomal protein S24-A OS=Saccharomyces cerevisiae (strain ATCC 204508 / S288c) GN=RPS24A PE=1 SV=1|40S ribosomal protein S24-B OS=Saccharomyces cerevisiae (strain ATCC 204508 / S288c) GN=RPS24B PE=1 SV=1	3	1	1	1	6	3	11	8.7759	8.1974	22.9879	27.3289	1.03937e-13	2.04308e-11	21.5317	0.95663	1	1	Long_CL - Long_NoCL	limma	1.03937e-13	2.04308e-11	TRUE	enriched hit	8.7759	TRUE	TRUE	FALSE
1085	RPS2	P25443	40S ribosomal protein S2 OS=Saccharomyces cerevisiae (strain ATCC 204508 / S288c) GN=RPS2 PE=1 SV=3	3	1	1	1	6	3	10	7.74817	5.35454	23.0456	27.1556	1.1361e-13	2.04308e-11	21.453	0.956905	1	1	Long_CL - Long_NoCL	limma	1.1361e-13	2.04308e-11	TRUE	enriched hit	7.74817	FALSE	TRUE	TRUE
1086	SYH1	Q02875	SMY2 homolog 2 OS=Saccharomyces cerevisiae (strain ATCC 204508 / S288c) GN=SYH1 PE=1 SV=1	3	1	1	1	6	3	4	5.64816	5.14565	19.6778	26.5662	1.54408e-13	2.15381e-11	21.0603	0.957839	1	1	Long_CL - Long_NoCL	limma	1.54408e-13	2.15381e-11	TRUE	enriched hit	5.64816	FALSE	TRUE	TRUE
1087	RPL39	P04650	60S ribosomal protein L39 OS=Saccharomyces cerevisiae (strain ATCC 204508 / S288c) GN=RPL39 PE=1 SV=3	2	1	1	NA	6	2	3	7.31447	5.96896	20.5768	26.2178	1.85689e-13	2.15381e-11	20.4594	0.958392	1	1	Long_CL - Long_NoCL	limma	1.85689e-13	2.15381e-11	TRUE	enriched hit	7.31447	TRUE	TRUE	FALSE
1088	SES1	P07284	Serine--tRNA ligase, cytoplasmic OS=Saccharomyces cerevisiae (strain ATCC 204508 / S288c) GN=SES1 PE=1 SV=2	3	1	1	1	6	3	21	7.68999	5.5567	24.2269	26.2092	1.86546e-13	2.15381e-11	21.0114	0.958405	1	1	Long_CL - Long_NoCL	limma	1.86546e-13	2.15381e-11	TRUE	enriched hit	7.68999	TRUE	TRUE	FALSE
1089	SUP45	P12385	Eukaryotic peptide chain release factor subunit 1 OS=Saccharomyces cerevisiae (strain ATCC 204508 / S288c) GN=SUP45 PE=1 SV=2	3	1	1	1	6	3	12	6.71163	4.65269	22.6888	26.0825	1.99612e-13	2.15381e-11	20.9507	0.958606	1	1	Long_CL - Long_NoCL	limma	1.99612e-13	2.15381e-11	TRUE	enriched hit	6.71163	TRUE	TRUE	FALSE
1090	SCD6	P45978	Protein SCD6 OS=Saccharomyces cerevisiae (strain ATCC 204508 / S288c) GN=SCD6 PE=1 SV=1	3	1	1	1	6	3	5	5.96581	4.72837	20.218	25.8372	2.27771e-13	2.23422e-11	20.6903	0.958995	1	1	Long_CL - Long_NoCL	limma	2.27771e-13	2.23422e-11	TRUE	enriched hit	5.96581	TRUE	TRUE	FALSE
1091	GCD14	P46959	tRNA (adenine(58)-N(1))-methyltransferase catalytic subunit TRM61 OS=Saccharomyces cerevisiae (strain ATCC 204508 / S288c) GN=GCD14 PE=1 SV=1	3	1	1	1	6	3	8	6.67015	5.47047	21.474	25.4487	2.81418e-13	2.37926e-11	20.6415	0.959611	1	1	Long_CL - Long_NoCL	limma	2.81418e-13	2.37926e-11	TRUE	enriched hit	6.67015	TRUE	TRUE	FALSE
1092	NOP12	Q08208	Nucleolar protein 12 OS=Saccharomyces cerevisiae (strain ATCC 204508 / S288c) GN=NOP12 PE=1 SV=1	3	1	1	1	6	3	8	6.40316	4.53134	22.3738	25.415	2.86658e-13	2.37926e-11	20.6248	0.959665	1	1	Long_CL - Long_NoCL	limma	2.86658e-13	2.37926e-11	TRUE	enriched hit	6.40316	FALSE	TRUE	TRUE
1093	EGD1	Q02642	Nascent polypeptide-associated complex subunit beta-1 OS=Saccharomyces cerevisiae (strain ATCC 204508 / S288c) GN=EGD1 PE=1 SV=2	3	1	1	1	6	3	8	6.94547	5.0877	22.3194	25.2159	3.19909e-13	2.45892e-11	20.5255	0.95998	1	1	Long_CL - Long_NoCL	limma	3.19909e-13	2.45892e-11	TRUE	enriched hit	6.94547	TRUE	TRUE	FALSE
1094	NOP1	P15646	rRNA 2'-O-methyltransferase fibrillarin OS=Saccharomyces cerevisiae (strain ATCC 204508 / S288c) GN=NOP1 PE=1 SV=1	3	1	1	1	6	3	6	6.79345	4.79609	22.7977	25.0964	3.41833e-13	2.45892e-11	20.4653	0.96017	1	1	Long_CL - Long_NoCL	limma	3.41833e-13	2.45892e-11	TRUE	enriched hit	6.79345	FALSE	TRUE	TRUE
1095	KRS1	P15180	Lysine--tRNA ligase, cytoplasmic OS=Saccharomyces cerevisiae (strain ATCC 204508 / S288c) GN=KRS1 PE=1 SV=2	3	1	1	1	6	3	21	7.40345	4.14507	24.5475	24.2738	5.4391e-13	3.35528e-11	20.0418	0.961474	1	1	Long_CL - Long_NoCL	limma	5.4391e-13	3.35528e-11	TRUE	enriched hit	7.40345	TRUE	TRUE	FALSE
1096	XRN1	P22147	5'-3' exoribonuclease 1 OS=Saccharomyces cerevisiae (strain ATCC 204508 / S288c) GN=XRN1 PE=1 SV=1	3	1	1	1	6	3	37	6.88662	4.18366	24.5089	24.2473	5.52247e-13	3.35528e-11	20.0279	0.961516	1	1	Long_CL - Long_NoCL	limma	5.52247e-13	3.35528e-11	TRUE	enriched hit	6.88662	FALSE	TRUE	TRUE
1097	DPS1	P04802	Aspartate--tRNA ligase, cytoplasmic OS=Saccharomyces cerevisiae (strain ATCC 204508 / S288c) GN=DPS1 PE=1 SV=3	3	1	1	1	6	3	26	7.41003	3.87111	25.0857	24.1473	5.8495e-13	3.35528e-11	19.9751	0.961675	1	1	Long_CL - Long_NoCL	limma	5.8495e-13	3.35528e-11	TRUE	enriched hit	7.41003	TRUE	TRUE	FALSE
1098	ZUO1	P32527	Zuotin OS=Saccharomyces cerevisiae (strain ATCC 204508 / S288c) GN=ZUO1 PE=1 SV=1	3	1	1	1	6	3	10	6.81966	4.05084	23.6011	24.13	5.90828e-13	3.35528e-11	19.966	0.961702	1	1	Long_CL - Long_NoCL	limma	5.90828e-13	3.35528e-11	TRUE	enriched hit	6.81966	FALSE	TRUE	TRUE
1099	DBP2	P24783	ATP-dependent RNA helicase DBP2 OS=Saccharomyces cerevisiae (strain ATCC 204508 / S288c) GN=DBP2 PE=1 SV=1	3	1	1	1	6	3	17	7.05881	4.19353	22.8607	23.9377	6.60422e-13	3.46679e-11	19.8637	0.962007	1	1	Long_CL - Long_NoCL	limma	6.60422e-13	3.46679e-11	TRUE	enriched hit	7.05881	FALSE	TRUE	TRUE
1100	DED1	P06634	ATP-dependent RNA helicase DED1 OS=Saccharomyces cerevisiae (strain ATCC 204508 / S288c) GN=DED1 PE=1 SV=2	3	1	1	1	6	3	20	7.30759	4.67666	23.826	23.9009	6.74723e-13	3.46679e-11	19.844	0.962066	1	1	Long_CL - Long_NoCL	limma	6.74723e-13	3.46679e-11	TRUE	enriched hit	7.30759	FALSE	TRUE	TRUE
1101	RBG1	P39729	Ribosome-interacting GTPase 1 OS=Saccharomyces cerevisiae (strain ATCC 204508 / S288c) GN=RBG1 PE=1 SV=1	3	1	1	1	6	3	8	6.41449	4.43462	21.6267	23.8016	7.14979e-13	3.49567e-11	19.7906	0.962223	1	1	Long_CL - Long_NoCL	limma	7.14979e-13	3.49567e-11	TRUE	enriched hit	6.41449	TRUE	TRUE	FALSE
1102	RPL14A|RPL14B	P36105|P38754	60S ribosomal protein L14-A OS=Saccharomyces cerevisiae (strain ATCC 204508 / S288c) GN=RPL14A PE=1 SV=1|60S ribosomal protein L14-B OS=Saccharomyces cerevisiae (strain ATCC 204508 / S288c) GN=RPL14B PE=1 SV=1	3	1	1	1	6	3	6	7.58434	5.09087	22.8312	23.731	7.45138e-13	3.49567e-11	19.7526	0.962335	1	1	Long_CL - Long_NoCL	limma	7.45138e-13	3.49567e-11	TRUE	enriched hit	7.58434	TRUE	TRUE	FALSE
1103	GBP2	P25555	Single-strand telomeric DNA-binding protein GBP2 OS=Saccharomyces cerevisiae (strain ATCC 204508 / S288c) GN=GBP2 PE=1 SV=1	3	1	1	1	6	3	12	7.11672	5.06291	23.1715	23.6129	7.98667e-13	3.59067e-11	19.6886	0.962522	1	1	Long_CL - Long_NoCL	limma	7.98667e-13	3.59067e-11	TRUE	enriched hit	7.11672	TRUE	TRUE	FALSE
1104	NUG1	P40010	Nuclear GTP-binding protein NUG1 OS=Saccharomyces cerevisiae (strain ATCC 204508 / S288c) GN=NUG1 PE=1 SV=1	3	1	1	1	6	3	7	6.27343	4.87644	22.1845	23.4244	8.92851e-13	3.83855e-11	19.5856	0.962821	1	1	Long_CL - Long_NoCL	limma	8.92851e-13	3.83855e-11	TRUE	enriched hit	6.27343	FALSE	TRUE	TRUE
1105	FRS1	P15624	Phenylalanine--tRNA ligase beta subunit OS=Saccharomyces cerevisiae (strain ATCC 204508 / S288c) GN=FRS1 PE=1 SV=3	3	1	1	1	6	3	10	6.42757	3.47441	22.8364	23.3227	9.48555e-13	3.83855e-11	19.5296	0.962983	1	1	Long_CL - Long_NoCL	limma	9.48555e-13	3.83855e-11	TRUE	enriched hit	6.42757	TRUE	TRUE	FALSE
1106	NPL3	Q01560	Nucleolar protein 3 OS=Saccharomyces cerevisiae (strain ATCC 204508 / S288c) GN=NPL3 PE=1 SV=1	3	1	1	1	6	3	12	7.44797	5.33319	23.0205	23.3016	9.60527e-13	3.83855e-11	19.518	0.963016	1	1	Long_CL - Long_NoCL	limma	9.60527e-13	3.83855e-11	TRUE	enriched hit	7.44797	FALSE	TRUE	TRUE
1107	TMA64	Q04600	Translation machinery-associated protein 64 OS=Saccharomyces cerevisiae (strain ATCC 204508 / S288c) GN=TMA64 PE=1 SV=1	3	1	1	1	6	3	9	6.49129	5.21513	22.822	23.201	1.0201e-12	3.86722e-11	19.4622	0.963176	1	1	Long_CL - Long_NoCL	limma	1.0201e-12	3.86722e-11	TRUE	enriched hit	6.49129	TRUE	TRUE	FALSE
1108	RPL8B	P29453	60S ribosomal protein L8-B OS=Saccharomyces cerevisiae (strain ATCC 204508 / S288c) GN=RPL8B PE=1 SV=3	3	1	1	1	6	3	2	7.59004	6.60771	21.0087	23.1697	1.03938e-12	3.86722e-11	19.4448	0.963225	1	1	Long_CL - Long_NoCL	limma	1.03938e-12	3.86722e-11	TRUE	enriched hit	7.59004	TRUE	TRUE	FALSE
1109	SCP160	P06105	Protein SCP160 OS=Saccharomyces cerevisiae (strain ATCC 204508 / S288c) GN=SCP160 PE=1 SV=3	3	1	1	1	6	3	55	7.6034	4.58433	25.6894	23.048	1.11831e-12	4.02219e-11	19.3769	0.963418	1	1	Long_CL - Long_NoCL	limma	1.11831e-12	4.02219e-11	TRUE	enriched hit	7.6034	FALSE	TRUE	TRUE
1110	ERP1	Q05359	Protein ERP1 OS=Saccharomyces cerevisiae (strain ATCC 204508 / S288c) GN=ERP1 PE=1 SV=1	2	1	NA	1	6	2	2	5.88632	4.03195	20.3776	22.8602	1.25288e-12	4.14736e-11	19.127	0.963716	1	1	Long_CL - Long_NoCL	limma	1.25288e-12	4.14736e-11	TRUE	enriched hit	5.88632	FALSE	TRUE	TRUE
1111	EFT1	P32324	Elongation factor 2 OS=Saccharomyces cerevisiae (strain ATCC 204508 / S288c) GN=EFT1 PE=1 SV=1	3	1	1	1	6	3	36	7.96538	3.47265	25.3995	22.8492	1.26127e-12	4.14736e-11	19.2651	0.963734	1	1	Long_CL - Long_NoCL	limma	1.26127e-12	4.14736e-11	TRUE	enriched hit	7.96538	FALSE	TRUE	TRUE
1112	TIF5	P38431|P38431-2	Eukaryotic translation initiation factor 5 OS=Saccharomyces cerevisiae (strain ATCC 204508 / S288c) GN=TIF5 PE=1 SV=1|Isoform Short of Eukaryotic translation initiation factor 5 OS=Saccharomyces cerevisiae (strain ATCC 204508 / S288c) GN=TIF5	3	1	1	1	6	3	8	6.33211	4.52936	21.8286	22.7327	1.35411e-12	4.14736e-11	19.1989	0.963919	1	1	Long_CL - Long_NoCL	limma	1.35411e-12	4.14736e-11	TRUE	enriched hit	6.33211	FALSE	TRUE	TRUE
1113	TIF35	Q04067	Eukaryotic translation initiation factor 3 subunit G OS=Saccharomyces cerevisiae (strain ATCC 204508 / S288c) GN=TIF35 PE=1 SV=1	3	1	1	1	6	3	5	6.73989	5.8215	21.9779	22.7309	1.35556e-12	4.14736e-11	19.1979	0.963921	1	1	Long_CL - Long_NoCL	limma	1.35556e-12	4.14736e-11	TRUE	enriched hit	6.73989	TRUE	TRUE	FALSE
1114	IRC22	P40006	Increased recombination centers protein 22 OS=Saccharomyces cerevisiae (strain ATCC 204508 / S288c) GN=IRC22 PE=1 SV=1	2	1	NA	1	6	2	2	6.32383	4.68386	21.0975	22.6694	1.40756e-12	4.14736e-11	19.0224	0.964019	1	1	Long_CL - Long_NoCL	limma	1.40756e-12	4.14736e-11	TRUE	enriched hit	6.32383	TRUE	TRUE	FALSE
1115	KES1	P35844	Oxysterol-binding protein homolog 4 OS=Saccharomyces cerevisiae (strain ATCC 204508 / S288c) GN=KES1 PE=1 SV=1	2	1	1	NA	6	2	4	6.11828	3.56242	21.1364	22.5841	1.48312e-12	4.14736e-11	18.9754	0.964154	1	1	Long_CL - Long_NoCL	limma	1.48312e-12	4.14736e-11	TRUE	enriched hit	6.11828	TRUE	TRUE	FALSE
1116	ILS1	P09436	Isoleucine--tRNA ligase, cytoplasmic OS=Saccharomyces cerevisiae (strain ATCC 204508 / S288c) GN=ILS1 PE=1 SV=1	3	1	1	1	6	3	27	7.03146	4.31207	23.9966	22.5651	1.50057e-12	4.14736e-11	19.1031	0.964184	1	1	Long_CL - Long_NoCL	limma	1.50057e-12	4.14736e-11	TRUE	enriched hit	7.03146	TRUE	TRUE	FALSE
1117	PDR16	P53860	Phosphatidylinositol transfer protein PDR16 OS=Saccharomyces cerevisiae (strain ATCC 204508 / S288c) GN=PDR16 PE=1 SV=1	3	1	1	1	6	3	6	5.97615	4.38515	21.1186	22.5614	1.50395e-12	4.14736e-11	19.101	0.96419	1	1	Long_CL - Long_NoCL	limma	1.50395e-12	4.14736e-11	TRUE	enriched hit	5.97615	FALSE	TRUE	TRUE
1118	TRP2	P00899	Anthranilate synthase component 1 OS=Saccharomyces cerevisiae (strain ATCC 204508 / S288c) GN=TRP2 PE=1 SV=4	2	1	1	NA	6	2	4	5.73949	4.16269	20.9774	22.5083	1.55401e-12	4.14736e-11	18.9174	0.964274	1	1	Long_CL - Long_NoCL	limma	1.55401e-12	4.14736e-11	TRUE	enriched hit	5.73949	FALSE	TRUE	TRUE
1119	RPL18A|RPL18B	P0CX49|P0CX50	60S ribosomal protein L18-A OS=Saccharomyces cerevisiae (strain ATCC 204508 / S288c) GN=RPL18A PE=1 SV=1|60S ribosomal protein L18-B OS=Saccharomyces cerevisiae (strain ATCC 204508 / S288c) GN=RPL18B PE=1 SV=1	3	1	1	1	6	3	10	7.71526	4.33685	23.9056	22.487	1.57449e-12	4.14736e-11	19.0582	0.964308	1	1	Long_CL - Long_NoCL	limma	1.57449e-12	4.14736e-11	TRUE	enriched hit	7.71526	TRUE	TRUE	FALSE
1120	ADO1	P47143	Adenosine kinase OS=Saccharomyces cerevisiae (strain ATCC 204508 / S288c) GN=ADO1 PE=1 SV=1	3	1	1	1	6	3	4	6.29028	3.76018	22.1897	22.474	1.58718e-12	4.14736e-11	19.0507	0.964329	1	1	Long_CL - Long_NoCL	limma	1.58718e-12	4.14736e-11	TRUE	enriched hit	6.29028	TRUE	TRUE	FALSE
1121	RPL21A|RPL21B	Q02753|Q12672	60S ribosomal protein L21-A OS=Saccharomyces cerevisiae (strain ATCC 204508 / S288c) GN=RPL21A PE=1 SV=1|60S ribosomal protein L21-B OS=Saccharomyces cerevisiae (strain ATCC 204508 / S288c) GN=RPL21B PE=1 SV=1	3	1	1	1	6	3	6	7.66185	4.83336	23.2034	22.4466	1.61436e-12	4.14736e-11	19.0348	0.964372	1	1	Long_CL - Long_NoCL	limma	1.61436e-12	4.14736e-11	TRUE	enriched hit	7.66185	FALSE	TRUE	TRUE
1122	RPS10B|RPS10A	P46784|Q08745	40S ribosomal protein S10-B OS=Saccharomyces cerevisiae (strain ATCC 204508 / S288c) GN=RPS10B PE=1 SV=1|40S ribosomal protein S10-A OS=Saccharomyces cerevisiae (strain ATCC 204508 / S288c) GN=RPS10A PE=1 SV=1	3	1	1	1	6	3	5	7.36627	4.9089	22.3921	22.3043	1.7632e-12	4.42441e-11	18.9523	0.964598	1	1	Long_CL - Long_NoCL	limma	1.7632e-12	4.42441e-11	TRUE	enriched hit	7.36627	TRUE	TRUE	FALSE
1123	RPL6A	Q02326	60S ribosomal protein L6-A OS=Saccharomyces cerevisiae (strain ATCC 204508 / S288c) GN=RPL6A PE=1 SV=2	3	1	1	1	6	3	8	8.63229	7.58899	23.3541	22.1589	1.93062e-12	4.73442e-11	18.8673	0.964829	1	1	Long_CL - Long_NoCL	limma	1.93062e-12	4.73442e-11	TRUE	enriched hit	8.63229	FALSE	TRUE	TRUE
1124	ADE12	P80210	Adenylosuccinate synthetase OS=Saccharomyces cerevisiae (strain ATCC 204508 / S288c) GN=ADE12 PE=1 SV=3	3	1	1	1	6	3	6	6.18622	4.74561	21.3375	21.6935	2.59084e-12	6.21225e-11	18.5909	0.965567	1	1	Long_CL - Long_NoCL	limma	2.59084e-12	6.21225e-11	TRUE	enriched hit	6.18622	TRUE	TRUE	FALSE
1125	MAP1	Q01662	Methionine aminopeptidase 1 OS=Saccharomyces cerevisiae (strain ATCC 204508 / S288c) GN=MAP1 PE=1 SV=2	3	1	1	1	6	3	4	6.19633	5.04922	20.6716	21.4344	3.05979e-12	7.07896e-11	18.4339	0.965978	1	1	Long_CL - Long_NoCL	limma	3.05979e-12	7.07896e-11	TRUE	enriched hit	6.19633	FALSE	TRUE	TRUE
1126	RPS23A|RPS23B	P0CX29|P0CX30	40S ribosomal protein S23-A OS=Saccharomyces cerevisiae (strain ATCC 204508 / S288c) GN=RPS23A PE=1 SV=1|40S ribosomal protein S23-B OS=Saccharomyces cerevisiae (strain ATCC 204508 / S288c) GN=RPS23B PE=1 SV=1	3	1	1	1	6	3	7	7.48513	5.11783	22.3131	21.4224	3.08351e-12	7.07896e-11	18.4266	0.965997	1	1	Long_CL - Long_NoCL	limma	3.08351e-12	7.07896e-11	TRUE	enriched hit	7.48513	TRUE	TRUE	FALSE
1127	ARC1	P46672	tRNA-aminoacylation cofactor ARC1 OS=Saccharomyces cerevisiae (strain ATCC 204508 / S288c) GN=ARC1 PE=1 SV=2	3	1	1	1	6	3	8	6.54439	4.54105	22.3751	21.3524	3.22646e-12	7.25282e-11	18.3838	0.966108	1	1	Long_CL - Long_NoCL	limma	3.22646e-12	7.25282e-11	TRUE	enriched hit	6.54439	TRUE	TRUE	FALSE
1128	RPS6A|RPS6B	P0CX37|P0CX38	40S ribosomal protein S6-A OS=Saccharomyces cerevisiae (strain ATCC 204508 / S288c) GN=RPS6A PE=1 SV=1|40S ribosomal protein S6-B OS=Saccharomyces cerevisiae (strain ATCC 204508 / S288c) GN=RPS6B PE=1 SV=1	3	1	1	1	6	3	13	8.23162	6.53961	23.5164	21.2951	3.34871e-12	7.29261e-11	18.3486	0.966199	1	1	Long_CL - Long_NoCL	limma	3.34871e-12	7.29261e-11	TRUE	enriched hit	8.23162	FALSE	TRUE	TRUE
1129	RPL16A	P26784	60S ribosomal protein L16-A OS=Saccharomyces cerevisiae (strain ATCC 204508 / S288c) GN=RPL16A PE=1 SV=3	3	1	1	1	6	3	13	8.15377	6.41926	23.1726	21.2811	3.37934e-12	7.29261e-11	18.34	0.966221	1	1	Long_CL - Long_NoCL	limma	3.37934e-12	7.29261e-11	TRUE	enriched hit	8.15377	FALSE	TRUE	TRUE
1130	CPR6	P53691	Peptidyl-prolyl cis-trans isomerase CPR6 OS=Saccharomyces cerevisiae (strain ATCC 204508 / S288c) GN=CPR6 PE=1 SV=1	3	1	1	1	6	3	3	5.91849	4.01627	21.3468	21.0599	3.90477e-12	8.00039e-11	18.2031	0.966572	1	1	Long_CL - Long_NoCL	limma	3.90477e-12	8.00039e-11	TRUE	enriched hit	5.91849	TRUE	TRUE	FALSE
1131	SUB2	Q07478	ATP-dependent RNA helicase SUB2 OS=Saccharomyces cerevisiae (strain ATCC 204508 / S288c) GN=SUB2 PE=1 SV=1	3	1	1	1	6	3	11	6.76705	4.73253	22.8171	21.0445	3.94424e-12	8.00039e-11	18.1936	0.966596	1	1	Long_CL - Long_NoCL	limma	3.94424e-12	8.00039e-11	TRUE	enriched hit	6.76705	TRUE	TRUE	FALSE
1132	PNO1	Q99216	Pre-rRNA-processing protein PNO1 OS=Saccharomyces cerevisiae (strain ATCC 204508 / S288c) GN=PNO1 PE=1 SV=1	3	1	1	1	6	3	5	6.48778	3.99914	22.0348	20.9919	4.08328e-12	8.00039e-11	18.1607	0.96668	1	1	Long_CL - Long_NoCL	limma	4.08328e-12	8.00039e-11	TRUE	enriched hit	6.48778	FALSE	TRUE	TRUE
1133	SSZ1	P38788	Ribosome-associated complex subunit SSZ1 OS=Saccharomyces cerevisiae (strain ATCC 204508 / S288c) GN=SSZ1 PE=1 SV=2	3	1	1	1	6	3	13	7.12103	3.65777	24.1597	20.9736	4.13273e-12	8.00039e-11	18.1493	0.966709	1	1	Long_CL - Long_NoCL	limma	4.13273e-12	8.00039e-11	TRUE	enriched hit	7.12103	TRUE	TRUE	FALSE
1134	EBP2	P36049	rRNA-processing protein EBP2 OS=Saccharomyces cerevisiae (strain ATCC 204508 / S288c) GN=EBP2 PE=1 SV=1	3	1	1	1	6	3	8	6.55132	3.45033	23.2159	20.9529	4.18961e-12	8.00039e-11	18.1363	0.966742	1	1	Long_CL - Long_NoCL	limma	4.18961e-12	8.00039e-11	TRUE	enriched hit	6.55132	FALSE	TRUE	TRUE
1135	RSR1	P13856	Ras-related protein RSR1 OS=Saccharomyces cerevisiae (strain ATCC 204508 / S288c) GN=RSR1 PE=3 SV=1	3	1	1	1	6	3	3	5.73861	4.46403	19.7447	20.94	4.22535e-12	8.00039e-11	17.859	0.966762	1	1	Long_CL - Long_NoCL	limma	4.22535e-12	8.00039e-11	TRUE	enriched hit	5.73861	TRUE	TRUE	FALSE
1136	VAC8	P39968	Vacuolar protein 8 OS=Saccharomyces cerevisiae (strain ATCC 204508 / S288c) GN=VAC8 PE=1 SV=3	3	1	1	1	6	3	6	6.19772	3.52195	22.3751	20.9396	4.22634e-12	8.00039e-11	18.128	0.966763	1	1	Long_CL - Long_NoCL	limma	4.22634e-12	8.00039e-11	TRUE	enriched hit	6.19772	FALSE	TRUE	TRUE
1137	TIF4632	P39936	Eukaryotic initiation factor 4F subunit p130 OS=Saccharomyces cerevisiae (strain ATCC 204508 / S288c) GN=TIF4632 PE=1 SV=1	3	1	1	1	6	3	9	6.52538	4.83686	22.3104	20.8793	4.39823e-12	8.11011e-11	18.0901	0.966858	1	1	Long_CL - Long_NoCL	limma	4.39823e-12	8.11011e-11	TRUE	enriched hit	6.52538	FALSE	TRUE	TRUE
1138	YNR021W	P53723	UPF0674 endoplasmic reticulum membrane protein YNR021W OS=Saccharomyces cerevisiae (strain ATCC 204508 / S288c) GN=YNR021W PE=1 SV=3	3	1	1	1	6	3	5	6.49192	4.6947	21.3171	20.8641	4.44269e-12	8.11011e-11	18.077	0.966883	1	1	Long_CL - Long_NoCL	limma	4.44269e-12	8.11011e-11	TRUE	enriched hit	6.49192	TRUE	TRUE	FALSE
1139	RPL8A	P17076	60S ribosomal protein L8-A OS=Saccharomyces cerevisiae (strain ATCC 204508 / S288c) GN=RPL8A PE=1 SV=4	2	1	NA	1	6	2	2	6.82062	5.03921	20.8635	20.8415	4.50979e-12	8.11011e-11	17.9623	0.966918	1	1	Long_CL - Long_NoCL	limma	4.50979e-12	8.11011e-11	TRUE	enriched hit	6.82062	FALSE	TRUE	TRUE
1140	MRN1	Q08925	RNA-binding protein MRN1 OS=Saccharomyces cerevisiae (strain ATCC 204508 / S288c) GN=MRN1 PE=1 SV=1	3	1	1	1	6	3	13	6.90184	5.42045	22.9173	20.8042	4.62272e-12	8.12253e-11	18.0428	0.966978	1	1	Long_CL - Long_NoCL	limma	4.62272e-12	8.12253e-11	TRUE	enriched hit	6.90184	FALSE	TRUE	TRUE
1141	CIC1	P38779	Proteasome-interacting protein CIC1 OS=Saccharomyces cerevisiae (strain ATCC 204508 / S288c) GN=CIC1 PE=1 SV=1	3	1	1	1	6	3	7	6.39635	4.20129	22.5906	20.7898	4.66725e-12	8.12253e-11	18.0337	0.967	1	1	Long_CL - Long_NoCL	limma	4.66725e-12	8.12253e-11	TRUE	enriched hit	6.39635	FALSE	TRUE	TRUE
1142	MRPS35	P53292	37S ribosomal protein S35, mitochondrial OS=Saccharomyces cerevisiae (strain ATCC 204508 / S288c) GN=MRPS35 PE=1 SV=1	3	1	1	1	6	3	6	6.20683	5.61158	20.7431	20.7381	4.83045e-12	8.26343e-11	17.8536	0.967082	1	1	Long_CL - Long_NoCL	limma	4.83045e-12	8.26343e-11	TRUE	enriched hit	6.20683	FALSE	TRUE	TRUE
1143	GND1	P38720	6-phosphogluconate dehydrogenase, decarboxylating 1 OS=Saccharomyces cerevisiae (strain ATCC 204508 / S288c) GN=GND1 PE=1 SV=1	3	1	1	1	6	3	10	6.62653	3.67158	23.0239	20.7163	4.90139e-12	8.26343e-11	17.9871	0.967117	1	1	Long_CL - Long_NoCL	limma	4.90139e-12	8.26343e-11	TRUE	enriched hit	6.62653	TRUE	TRUE	FALSE
1144	RPS14B	P39516	40S ribosomal protein S14-B OS=Saccharomyces cerevisiae (strain ATCC 204508 / S288c) GN=RPS14B PE=1 SV=2	3	1	1	1	6	3	7	7.37602	3.99306	23.0018	20.659	5.09227e-12	8.34802e-11	17.9508	0.967208	1	1	Long_CL - Long_NoCL	limma	5.09227e-12	8.34802e-11	TRUE	enriched hit	7.37602	FALSE	TRUE	TRUE
1145	MRD1	Q06106	Multiple RNA-binding domain-containing protein 1 OS=Saccharomyces cerevisiae (strain ATCC 204508 / S288c) GN=MRD1 PE=1 SV=1	3	1	1	1	6	3	16	6.6956	4.57005	23.1022	20.6549	5.1063e-12	8.34802e-11	17.9482	0.967214	1	1	Long_CL - Long_NoCL	limma	5.1063e-12	8.34802e-11	TRUE	enriched hit	6.6956	FALSE	TRUE	TRUE
1146	FBA1	P14540	Fructose-bisphosphate aldolase OS=Saccharomyces cerevisiae (strain ATCC 204508 / S288c) GN=FBA1 PE=1 SV=3	3	1	1	1	6	3	10	7.77361	4.24437	24.0181	20.5707	5.40268e-12	8.46331e-11	17.8944	0.967348	1	1	Long_CL - Long_NoCL	limma	5.40268e-12	8.46331e-11	TRUE	enriched hit	7.77361	TRUE	TRUE	FALSE
1147	RPL1A|RPL1B	P0CX43|P0CX44	60S ribosomal protein L1-A OS=Saccharomyces cerevisiae (strain ATCC 204508 / S288c) GN=RPL1A PE=1 SV=1|60S ribosomal protein L1-B OS=Saccharomyces cerevisiae (strain ATCC 204508 / S288c) GN=RPL1B PE=1 SV=1	3	1	1	1	6	3	6	6.66095	4.08658	21.6035	20.57	5.40516e-12	8.46331e-11	17.894	0.967349	1	1	Long_CL - Long_NoCL	limma	5.40516e-12	8.46331e-11	TRUE	enriched hit	6.66095	TRUE	TRUE	FALSE
1148	RPL6B	P05739	60S ribosomal protein L6-B OS=Saccharomyces cerevisiae (strain ATCC 204508 / S288c) GN=RPL6B PE=1 SV=4	3	1	1	1	6	3	8	8.97602	6.94178	23.8522	20.5681	5.41213e-12	8.46331e-11	17.8927	0.967352	1	1	Long_CL - Long_NoCL	limma	5.41213e-12	8.46331e-11	TRUE	enriched hit	8.97602	FALSE	TRUE	TRUE
1149	ENP1	P38333	Essential nuclear protein 1 OS=Saccharomyces cerevisiae (strain ATCC 204508 / S288c) GN=ENP1 PE=1 SV=1	3	1	1	1	6	3	7	6.46352	5.48304	22.1893	20.4667	5.79428e-12	8.7043e-11	17.8277	0.967513	1	1	Long_CL - Long_NoCL	limma	5.79428e-12	8.7043e-11	TRUE	enriched hit	6.46352	FALSE	TRUE	TRUE
1150	SSS1	P35179	Protein transport protein SSS1 OS=Saccharomyces cerevisiae (strain ATCC 204508 / S288c) GN=SSS1 PE=1 SV=2	3	1	1	1	6	3	3	6.42385	3.4485	21.9187	20.4658	5.79777e-12	8.7043e-11	17.8271	0.967514	1	1	Long_CL - Long_NoCL	limma	5.79777e-12	8.7043e-11	TRUE	enriched hit	6.42385	TRUE	TRUE	FALSE
1151	POR1	P04840	Mitochondrial outer membrane protein porin 1 OS=Saccharomyces cerevisiae (strain ATCC 204508 / S288c) GN=POR1 PE=1 SV=4	2	1	1	NA	6	2	7	6.21028	3.96479	22.1863	20.4631	5.80824e-12	8.7043e-11	17.7287	0.967519	1	1	Long_CL - Long_NoCL	limma	5.80824e-12	8.7043e-11	TRUE	enriched hit	6.21028	FALSE	TRUE	TRUE
1152	TIF1	P10081	ATP-dependent RNA helicase eIF4A OS=Saccharomyces cerevisiae (strain ATCC 204508 / S288c) GN=TIF1 PE=1 SV=3	3	1	1	1	6	3	18	7.54288	4.45787	23.8877	20.4424	5.89016e-12	8.70614e-11	17.812	0.967552	1	1	Long_CL - Long_NoCL	limma	5.89016e-12	8.70614e-11	TRUE	enriched hit	7.54288	TRUE	TRUE	FALSE
1153	CDC33	P07260	Eukaryotic translation initiation factor 4E OS=Saccharomyces cerevisiae (strain ATCC 204508 / S288c) GN=CDC33 PE=1 SV=1	3	1	1	1	6	3	2	6.63273	5.82631	21.5661	20.4139	6.00452e-12	8.75525e-11	17.7804	0.967597	1	1	Long_CL - Long_NoCL	limma	6.00452e-12	8.75525e-11	TRUE	enriched hit	6.63273	TRUE	TRUE	FALSE
1154	NEW1	Q08972	[NU+] prion formation protein 1 OS=Saccharomyces cerevisiae (strain ATCC 204508 / S288c) GN=NEW1 PE=1 SV=1	3	1	1	1	6	3	28	7.02297	4.02166	24.2752	20.3939	6.08625e-12	8.75608e-11	17.7808	0.967628	1	1	Long_CL - Long_NoCL	limma	6.08625e-12	8.75608e-11	TRUE	enriched hit	7.02297	FALSE	TRUE	TRUE
1155	SRO9	P25567	RNA-binding protein SRO9 OS=Saccharomyces cerevisiae (strain ATCC 204508 / S288c) GN=SRO9 PE=1 SV=2	3	1	1	1	6	3	14	6.98457	6.13115	22.4169	20.3553	6.24764e-12	8.87e-11	17.7558	0.96769	1	1	Long_CL - Long_NoCL	limma	6.24764e-12	8.87e-11	TRUE	enriched hit	6.98457	TRUE	TRUE	FALSE
1156	VAS1	P07806|P07806-2	Isoform Cytoplasmic of Valine--tRNA ligase, mitochondrial OS=Saccharomyces cerevisiae (strain ATCC 204508 / S288c) GN=VAS1|Valine--tRNA ligase, mitochondrial OS=Saccharomyces cerevisiae (strain ATCC 204508 / S288c) GN=VAS1 PE=1 SV=2	3	1	1	1	6	3	36	7.05608	3.98977	24.7582	20.333	6.34263e-12	8.88792e-11	17.7414	0.967725	1	1	Long_CL - Long_NoCL	limma	6.34263e-12	8.88792e-11	TRUE	enriched hit	7.05608	TRUE	TRUE	FALSE
1157	YLR419W	Q06698	Putative ATP-dependent RNA helicase YLR419W OS=Saccharomyces cerevisiae (strain ATCC 204508 / S288c) GN=YLR419W PE=1 SV=1	3	1	1	1	6	3	20	6.42981	4.79703	22.568	20.258	6.67457e-12	9.23316e-11	17.6926	0.967844	1	1	Long_CL - Long_NoCL	limma	6.67457e-12	9.23316e-11	TRUE	enriched hit	6.42981	FALSE	TRUE	TRUE
1158	NOG2	P53742	Nucleolar GTP-binding protein 2 OS=Saccharomyces cerevisiae (strain ATCC 204508 / S288c) GN=NOG2 PE=1 SV=1	3	1	1	1	6	3	16	6.61173	5.00017	22.7519	20.2342	6.7835e-12	9.26506e-11	17.6771	0.967882	1	1	Long_CL - Long_NoCL	limma	6.7835e-12	9.26506e-11	TRUE	enriched hit	6.61173	FALSE	TRUE	TRUE
1159	SPB1	P25582	27S pre-rRNA (guanosine(2922)-2'-O)-methyltransferase OS=Saccharomyces cerevisiae (strain ATCC 204508 / S288c) GN=SPB1 PE=1 SV=2	3	1	1	1	6	3	12	6.71553	4.09563	22.7381	20.2149	6.8734e-12	9.2705e-11	17.6646	0.967912	1	1	Long_CL - Long_NoCL	limma	6.8734e-12	9.2705e-11	TRUE	enriched hit	6.71553	FALSE	TRUE	TRUE
1160	DEF1	P35732	RNA polymerase II degradation factor 1 OS=Saccharomyces cerevisiae (strain ATCC 204508 / S288c) GN=DEF1 PE=1 SV=1	3	1	1	1	6	3	11	7.07384	5.10688	23.6284	20.1957	6.96418e-12	9.27698e-11	17.652	0.967943	1	1	Long_CL - Long_NoCL	limma	6.96418e-12	9.27698e-11	TRUE	enriched hit	7.07384	FALSE	TRUE	TRUE
1161	TDH1	P00360	Glyceraldehyde-3-phosphate dehydrogenase 1 OS=Saccharomyces cerevisiae (strain ATCC 204508 / S288c) GN=TDH1 PE=1 SV=3	2	1	1	NA	6	2	3	6.03181	3.59355	20.1673	19.9952	7.99133e-12	1.02894e-10	17.4325	0.968261	1	1	Long_CL - Long_NoCL	limma	7.99133e-12	1.02894e-10	TRUE	enriched hit	6.03181	TRUE	TRUE	FALSE
1162	HYP2	P23301	Eukaryotic translation initiation factor 5A-1 OS=Saccharomyces cerevisiae (strain ATCC 204508 / S288c) GN=HYP2 PE=1 SV=3	2	1	1	NA	6	2	3	6.60365	5.79166	21.9022	19.9922	8.00768e-12	1.02894e-10	17.4306	0.968266	1	1	Long_CL - Long_NoCL	limma	8.00768e-12	1.02894e-10	TRUE	enriched hit	6.60365	TRUE	TRUE	FALSE
1163	ERG13	P54839	Hydroxymethylglutaryl-CoA synthase OS=Saccharomyces cerevisiae (strain ATCC 204508 / S288c) GN=ERG13 PE=1 SV=1	3	1	1	1	6	3	10	6.73674	3.34339	23.5363	19.9912	8.01333e-12	1.02894e-10	17.5176	0.968267	1	1	Long_CL - Long_NoCL	limma	8.01333e-12	1.02894e-10	TRUE	enriched hit	6.73674	FALSE	TRUE	TRUE
1164	RPS22A|RPS22B	P0C0W1|Q3E7Y3	40S ribosomal protein S22-A OS=Saccharomyces cerevisiae (strain ATCC 204508 / S288c) GN=RPS22A PE=1 SV=2|40S ribosomal protein S22-B OS=Saccharomyces cerevisiae (strain ATCC 204508 / S288c) GN=RPS22B PE=1 SV=3	2	1	1	NA	6	2	4	6.69193	4.49925	20.4838	19.9746	8.10567e-12	1.02894e-10	17.4193	0.968294	1	1	Long_CL - Long_NoCL	limma	8.10567e-12	1.02894e-10	TRUE	enriched hit	6.69193	FALSE	TRUE	TRUE
1165	RRP8	P38961	25S rRNA (adenine(645)-N(1))-methyltransferase OS=Saccharomyces cerevisiae (strain ATCC 204508 / S288c) GN=RRP8 PE=1 SV=2	2	1	NA	1	6	2	4	5.80433	3.81431	21.3023	19.9247	8.38958e-12	1.0526e-10	17.3873	0.968373	1	1	Long_CL - Long_NoCL	limma	8.38958e-12	1.0526e-10	TRUE	enriched hit	5.80433	FALSE	TRUE	TRUE
1166	YFR016C	P43597	Uncharacterized protein YFR016C OS=Saccharomyces cerevisiae (strain ATCC 204508 / S288c) GN=YFR016C PE=1 SV=1	3	1	1	1	6	3	25	6.68808	5.21318	23.4339	19.87	8.71358e-12	1.08068e-10	17.4373	0.96846	1	1	Long_CL - Long_NoCL	limma	8.71358e-12	1.08068e-10	TRUE	enriched hit	6.68808	FALSE	TRUE	TRUE
1167	MSS116	P15424	ATP-dependent RNA helicase MSS116, mitochondrial OS=Saccharomyces cerevisiae (strain ATCC 204508 / S288c) GN=MSS116 PE=1 SV=1	3	1	1	1	6	3	15	6.48675	5.81906	21.9904	19.8321	8.9461e-12	1.09588e-10	17.412	0.96852	1	1	Long_CL - Long_NoCL	limma	8.9461e-12	1.09588e-10	TRUE	enriched hit	6.48675	FALSE	TRUE	TRUE
1168	GLN1	P32288	Glutamine synthetase OS=Saccharomyces cerevisiae (strain ATCC 204508 / S288c) GN=GLN1 PE=1 SV=4	3	1	1	1	6	3	5	6.32525	2.92616	23.0747	19.7975	9.1634e-12	1.09588e-10	17.389	0.968575	1	1	Long_CL - Long_NoCL	limma	9.1634e-12	1.09588e-10	TRUE	enriched hit	6.32525	FALSE	TRUE	TRUE
1169	YPL199C	Q08954	Smr domain-containing protein YPL199C OS=Saccharomyces cerevisiae (strain ATCC 204508 / S288c) GN=YPL199C PE=1 SV=1	3	1	1	1	6	3	3	5.67251	4.18368	19.4812	19.7921	9.19832e-12	1.09588e-10	17.3293	0.968583	1	1	Long_CL - Long_NoCL	limma	9.19832e-12	1.09588e-10	TRUE	enriched hit	5.67251	TRUE	TRUE	FALSE
1170	RLP24	Q07915	Ribosome biogenesis protein RLP24 OS=Saccharomyces cerevisiae (strain ATCC 204508 / S288c) GN=RLP24 PE=1 SV=1	2	1	1	NA	6	2	2	6.53683	4.261	20.2531	19.7852	9.24239e-12	1.09588e-10	17.144	0.968594	1	1	Long_CL - Long_NoCL	limma	9.24239e-12	1.09588e-10	TRUE	enriched hit	6.53683	FALSE	TRUE	TRUE
1171	SEC14	P24280	SEC14 cytosolic factor OS=Saccharomyces cerevisiae (strain ATCC 204508 / S288c) GN=SEC14 PE=1 SV=3	3	1	1	1	6	3	5	6.38394	3.28333	22.803	19.7307	9.60029e-12	1.11964e-10	17.3442	0.968681	1	1	Long_CL - Long_NoCL	limma	9.60029e-12	1.11964e-10	TRUE	enriched hit	6.38394	FALSE	TRUE	TRUE
1172	CDC37	P06101	Hsp90 co-chaperone Cdc37 OS=Saccharomyces cerevisiae (strain ATCC 204508 / S288c) GN=CDC37 PE=1 SV=2	2	1	1	NA	6	2	4	5.67547	3.92079	20.9382	19.7233	9.65024e-12	1.11964e-10	17.2567	0.968692	1	1	Long_CL - Long_NoCL	limma	9.65024e-12	1.11964e-10	TRUE	enriched hit	5.67547	FALSE	TRUE	TRUE
1173	CCT8	P47079	T-complex protein 1 subunit theta OS=Saccharomyces cerevisiae (strain ATCC 204508 / S288c) GN=CCT8 PE=1 SV=1	3	1	1	1	6	3	5	5.9636	3.10998	21.0937	19.6909	9.87058e-12	1.13302e-10	17.272	0.968744	1	1	Long_CL - Long_NoCL	limma	9.87058e-12	1.13302e-10	TRUE	enriched hit	5.9636	FALSE	TRUE	TRUE
1174	TRR1	P29509	Thioredoxin reductase 1 OS=Saccharomyces cerevisiae (strain ATCC 204508 / S288c) GN=TRR1 PE=1 SV=3	2	1	NA	1	6	2	4	6.00207	5.46454	20.3853	19.6131	1.04241e-11	1.18396e-10	16.8675	0.968867	1	1	Long_CL - Long_NoCL	limma	1.04241e-11	1.18396e-10	TRUE	enriched hit	6.00207	TRUE	TRUE	FALSE
1175	CDC3	P32457	Cell division control protein 3 OS=Saccharomyces cerevisiae (strain ATCC 204508 / S288c) GN=CDC3 PE=1 SV=3	3	1	1	1	6	3	5	5.89685	4.35679	21.6167	19.5699	1.07449e-11	1.20768e-10	17.2359	0.968936	1	1	Long_CL - Long_NoCL	limma	1.07449e-11	1.20768e-10	TRUE	enriched hit	5.89685	FALSE	TRUE	TRUE
1176	SSB2	P40150	Heat shock protein SSB2 OS=Saccharomyces cerevisiae (strain ATCC 204508 / S288c) GN=SSB2 PE=1 SV=2	2	1	NA	1	6	2	2	6.97667	3.73408	21.966	19.5383	1.09864e-11	1.2221e-10	17.1246	0.968986	1	1	Long_CL - Long_NoCL	limma	1.09864e-11	1.2221e-10	TRUE	enriched hit	6.97667	FALSE	TRUE	TRUE
1177	LEU1	P07264	3-isopropylmalate dehydratase OS=Saccharomyces cerevisiae (strain ATCC 204508 / S288c) GN=LEU1 PE=1 SV=3	3	1	1	1	6	3	18	6.97359	3.5799	24.3815	19.4874	1.13883e-11	1.25387e-10	17.1799	0.969067	1	1	Long_CL - Long_NoCL	limma	1.13883e-11	1.25387e-10	TRUE	enriched hit	6.97359	FALSE	TRUE	TRUE
1178	TEF1	P02994	Elongation factor 1-alpha OS=Saccharomyces cerevisiae (strain ATCC 204508 / S288c) GN=TEF1 PE=1 SV=1	3	1	1	1	6	3	21	8.55396	3.71641	25.8516	19.4107	1.20232e-11	1.31041e-10	17.1277	0.969188	1	1	Long_CL - Long_NoCL	limma	1.20232e-11	1.31041e-10	TRUE	enriched hit	8.55396	TRUE	TRUE	FALSE
1179	GLO3	P38682	ADP-ribosylation factor GTPase-activating protein GLO3 OS=Saccharomyces cerevisiae (strain ATCC 204508 / S288c) GN=GLO3 PE=1 SV=1	2	1	1	NA	6	2	4	6.16571	3.69832	21.7224	19.3497	1.25548e-11	1.35467e-10	17.0104	0.969285	1	1	Long_CL - Long_NoCL	limma	1.25548e-11	1.35467e-10	TRUE	enriched hit	6.16571	TRUE	TRUE	FALSE
1180	UTP7	P40055	U3 small nucleolar RNA-associated protein 7 OS=Saccharomyces cerevisiae (strain ATCC 204508 / S288c) GN=UTP7 PE=1 SV=1	3	1	1	1	6	3	5	6.03583	3.47469	21.7087	19.2667	1.33196e-11	1.42296e-10	17.0289	0.969417	1	1	Long_CL - Long_NoCL	limma	1.33196e-11	1.42296e-10	TRUE	enriched hit	6.03583	FALSE	TRUE	TRUE
1181	RPL38	P49167	60S ribosomal protein L38 OS=Saccharomyces cerevisiae (strain ATCC 204508 / S288c) GN=RPL38 PE=1 SV=1	3	1	1	1	6	3	3	7.10627	5.46728	21.7265	19.1342	1.46452e-11	1.54923e-10	16.9373	0.969627	1	1	Long_CL - Long_NoCL	limma	1.46452e-11	1.54923e-10	TRUE	enriched hit	7.10627	TRUE	TRUE	FALSE
1182	SBP1	P10080	Single-stranded nucleic acid-binding protein OS=Saccharomyces cerevisiae (strain ATCC 204508 / S288c) GN=SBP1 PE=1 SV=2	3	1	1	1	6	3	12	7.58513	5.71171	23.0128	19.0921	1.50945e-11	1.58126e-10	16.9081	0.969694	1	1	Long_CL - Long_NoCL	limma	1.50945e-11	1.58126e-10	TRUE	enriched hit	7.58513	FALSE	TRUE	TRUE
1183	GUA1	P38625	GMP synthase [glutamine-hydrolyzing] OS=Saccharomyces cerevisiae (strain ATCC 204508 / S288c) GN=GUA1 PE=1 SV=4	3	1	1	1	6	3	12	6.73935	3.90847	23.3412	19.0514	1.55441e-11	1.6127e-10	16.8797	0.969758	1	1	Long_CL - Long_NoCL	limma	1.55441e-11	1.6127e-10	TRUE	enriched hit	6.73935	TRUE	TRUE	FALSE
1184	ETR1	P38071	Enoyl-[acyl-carrier protein] reductase [NADPH, B-specific], mitochondrial OS=Saccharomyces cerevisiae (strain ATCC 204508 / S288c) GN=ETR1 PE=1 SV=3	2	1	1	NA	6	2	3	5.74451	3.287	19.8553	18.9681	1.65076e-11	1.69635e-10	16.7305	0.969891	1	1	Long_CL - Long_NoCL	limma	1.65076e-11	1.69635e-10	TRUE	enriched hit	5.74451	FALSE	TRUE	TRUE
1185	SPE3	Q12074	Spermidine synthase OS=Saccharomyces cerevisiae (strain ATCC 204508 / S288c) GN=SPE3 PE=1 SV=1	3	1	1	1	6	3	5	6.15121	4.57053	21.0093	18.9094	1.72262e-11	1.70915e-10	16.7803	0.969984	1	1	Long_CL - Long_NoCL	limma	1.72262e-11	1.70915e-10	TRUE	enriched hit	6.15121	TRUE	TRUE	FALSE
1186	VMA1	P17255	V-type proton ATPase catalytic subunit A OS=Saccharomyces cerevisiae (strain ATCC 204508 / S288c) GN=VMA1 PE=1 SV=3	3	1	1	1	6	3	25	7.2569	3.14594	24.4298	18.9076	1.72485e-11	1.70915e-10	16.779	0.969987	1	1	Long_CL - Long_NoCL	limma	1.72485e-11	1.70915e-10	TRUE	enriched hit	7.2569	TRUE	TRUE	FALSE
1187	HCR1	Q05775	Eukaryotic translation initiation factor 3 subunit J OS=Saccharomyces cerevisiae (strain ATCC 204508 / S288c) GN=HCR1 PE=1 SV=1	3	1	1	1	6	3	4	6.57433	4.6648	22.0441	18.9025	1.73121e-11	1.70915e-10	16.7755	0.969995	1	1	Long_CL - Long_NoCL	limma	1.73121e-11	1.70915e-10	TRUE	enriched hit	6.57433	FALSE	TRUE	TRUE
1188	HHO1	P53551	Histone H1 OS=Saccharomyces cerevisiae (strain ATCC 204508 / S288c) GN=HHO1 PE=1 SV=1	2	1	1	NA	6	2	2	5.99164	4.18745	20.8842	18.8967	1.7386e-11	1.70915e-10	16.7042	0.970004	1	1	Long_CL - Long_NoCL	limma	1.7386e-11	1.70915e-10	TRUE	enriched hit	5.99164	FALSE	TRUE	TRUE
1189	HOM2	P13663	Aspartate-semialdehyde dehydrogenase OS=Saccharomyces cerevisiae (strain ATCC 204508 / S288c) GN=HOM2 PE=1 SV=1	3	1	1	1	6	3	8	6.60066	3.277	22.3415	18.8935	1.74261e-11	1.70915e-10	16.7691	0.970009	1	1	Long_CL - Long_NoCL	limma	1.74261e-11	1.70915e-10	TRUE	enriched hit	6.60066	TRUE	TRUE	FALSE
1190	ACO1	P19414	Aconitate hydratase, mitochondrial OS=Saccharomyces cerevisiae (strain ATCC 204508 / S288c) GN=ACO1 PE=1 SV=2	3	1	1	1	6	3	16	6.48618	3.4187	23.8279	18.8732	1.76858e-11	1.70915e-10	16.7548	0.970041	1	1	Long_CL - Long_NoCL	limma	1.76858e-11	1.70915e-10	TRUE	enriched hit	6.48618	TRUE	TRUE	FALSE
1191	IPP1	P00817	Inorganic pyrophosphatase OS=Saccharomyces cerevisiae (strain ATCC 204508 / S288c) GN=IPP1 PE=1 SV=4	3	1	1	1	6	3	8	6.13393	3.80963	22.1536	18.8687	1.77426e-11	1.70915e-10	16.7517	0.970048	1	1	Long_CL - Long_NoCL	limma	1.77426e-11	1.70915e-10	TRUE	enriched hit	6.13393	TRUE	TRUE	FALSE
1192	ENO2	P00925	Enolase 2 OS=Saccharomyces cerevisiae (strain ATCC 204508 / S288c) GN=ENO2 PE=1 SV=2	3	1	1	1	6	3	13	7.26511	4.00142	23.7545	18.8567	1.78994e-11	1.70915e-10	16.7432	0.970067	1	1	Long_CL - Long_NoCL	limma	1.78994e-11	1.70915e-10	TRUE	enriched hit	7.26511	TRUE	TRUE	FALSE
1193	URA2	P07259	Protein URA2 OS=Saccharomyces cerevisiae (strain ATCC 204508 / S288c) GN=URA2 PE=1 SV=5	3	1	1	1	6	3	44	7.17087	2.91348	25.0815	18.8362	1.81685e-11	1.71963e-10	16.7287	0.9701	1	1	Long_CL - Long_NoCL	limma	1.81685e-11	1.71963e-10	TRUE	enriched hit	7.17087	FALSE	TRUE	TRUE
1194	NOP7	P53261	Pescadillo homolog OS=Saccharomyces cerevisiae (strain ATCC 204508 / S288c) GN=NOP7 PE=1 SV=1	3	1	1	1	6	3	17	6.8767	4.9137	23.1266	18.8161	1.84363e-11	1.72665e-10	16.7145	0.970132	1	1	Long_CL - Long_NoCL	limma	1.84363e-11	1.72665e-10	TRUE	enriched hit	6.8767	FALSE	TRUE	TRUE
1195	RPS4A|RPS4B	P0CX35|P0CX36	40S ribosomal protein S4-A OS=Saccharomyces cerevisiae (strain ATCC 204508 / S288c) GN=RPS4A PE=1 SV=1|40S ribosomal protein S4-B OS=Saccharomyces cerevisiae (strain ATCC 204508 / S288c) GN=RPS4B PE=1 SV=1	3	1	1	1	6	3	20	8.61098	5.22138	24.804	18.8023	1.86232e-11	1.72665e-10	16.7047	0.970154	1	1	Long_CL - Long_NoCL	limma	1.86232e-11	1.72665e-10	TRUE	enriched hit	8.61098	FALSE	TRUE	TRUE
1196	BFR1	P38934	Nuclear segregation protein BFR1 OS=Saccharomyces cerevisiae (strain ATCC 204508 / S288c) GN=BFR1 PE=1 SV=1	3	1	1	1	6	3	29	7.29799	4.83205	24.6751	18.795	1.87227e-11	1.72665e-10	16.6996	0.970165	1	1	Long_CL - Long_NoCL	limma	1.87227e-11	1.72665e-10	TRUE	enriched hit	7.29799	FALSE	TRUE	TRUE
1197	NOG1	Q02892	Nucleolar GTP-binding protein 1 OS=Saccharomyces cerevisiae (strain ATCC 204508 / S288c) GN=NOG1 PE=1 SV=1	3	1	1	1	6	3	15	6.64396	4.324	22.9096	18.7784	1.89504e-11	1.72716e-10	16.6879	0.970192	1	1	Long_CL - Long_NoCL	limma	1.89504e-11	1.72716e-10	TRUE	enriched hit	6.64396	FALSE	TRUE	TRUE
1198	TAL1	P15019	Transaldolase OS=Saccharomyces cerevisiae (strain ATCC 204508 / S288c) GN=TAL1 PE=1 SV=4	3	1	1	1	6	3	10	6.26683	3.27582	22.5335	18.7714	1.90484e-11	1.72716e-10	16.6829	0.970203	1	1	Long_CL - Long_NoCL	limma	1.90484e-11	1.72716e-10	TRUE	enriched hit	6.26683	TRUE	TRUE	FALSE
1199	PDC1	P06169	Pyruvate decarboxylase isozyme 1 OS=Saccharomyces cerevisiae (strain ATCC 204508 / S288c) GN=PDC1 PE=1 SV=7	3	1	1	1	6	3	16	8.03637	2.99144	24.4622	18.7375	1.9526e-11	1.752e-10	16.6589	0.970256	1	1	Long_CL - Long_NoCL	limma	1.9526e-11	1.752e-10	TRUE	enriched hit	8.03637	FALSE	TRUE	TRUE
1200	DHH1	P39517	ATP-dependent RNA helicase DHH1 OS=Saccharomyces cerevisiae (strain ATCC 204508 / S288c) GN=DHH1 PE=1 SV=1	3	1	1	1	6	3	10	6.70652	4.30855	22.631	18.7291	1.96471e-11	1.752e-10	16.6529	0.97027	1	1	Long_CL - Long_NoCL	limma	1.96471e-11	1.752e-10	TRUE	enriched hit	6.70652	FALSE	TRUE	TRUE
1201	RPS3	P05750	40S ribosomal protein S3 OS=Saccharomyces cerevisiae (strain ATCC 204508 / S288c) GN=RPS3 PE=1 SV=5	3	1	1	1	6	3	14	8.02444	4.53024	23.7969	18.7027	2.00304e-11	1.77154e-10	16.6341	0.970312	1	1	Long_CL - Long_NoCL	limma	2.00304e-11	1.77154e-10	TRUE	enriched hit	8.02444	TRUE	TRUE	FALSE
1202	UGP1	P32861	UTP--glucose-1-phosphate uridylyltransferase OS=Saccharomyces cerevisiae (strain ATCC 204508 / S288c) GN=UGP1 PE=1 SV=1	3	1	1	1	6	3	11	6.58569	3.26293	23.4104	18.6376	2.10116e-11	1.84321e-10	16.5877	0.970415	1	1	Long_CL - Long_NoCL	limma	2.10116e-11	1.84321e-10	TRUE	enriched hit	6.58569	FALSE	TRUE	TRUE
1203	POM152	P39685	Nucleoporin POM152 OS=Saccharomyces cerevisiae (strain ATCC 204508 / S288c) GN=POM152 PE=1 SV=1	2	1	1	NA	5	2	5	5.42459	3.45591	20.4266	18.6161	2.13473e-11	1.85294e-10	16.5011	0.970449	1	1	Long_CL - Long_NoCL	limma	2.13473e-11	1.85294e-10	TRUE	enriched hit	5.42459	FALSE	TRUE	TRUE
1204	TSA1	P34760	Peroxiredoxin TSA1 OS=Saccharomyces cerevisiae (strain ATCC 204508 / S288c) GN=TSA1 PE=1 SV=3	3	1	1	1	6	3	10	7.14818	3.64333	22.8755	18.5989	2.16195e-11	1.85294e-10	16.56	0.970476	1	1	Long_CL - Long_NoCL	limma	2.16195e-11	1.85294e-10	TRUE	enriched hit	7.14818	TRUE	TRUE	FALSE
1205	RPS25B|RPS25A	P0C0T4|Q3E792	40S ribosomal protein S25-B OS=Saccharomyces cerevisiae (strain ATCC 204508 / S288c) GN=RPS25B PE=1 SV=1|40S ribosomal protein S25-A OS=Saccharomyces cerevisiae (strain ATCC 204508 / S288c) GN=RPS25A PE=1 SV=1	3	1	1	1	6	3	7	7.60295	4.44784	23.788	18.59	2.17625e-11	1.85294e-10	16.5536	0.970491	1	1	Long_CL - Long_NoCL	limma	2.17625e-11	1.85294e-10	TRUE	enriched hit	7.60295	TRUE	TRUE	FALSE
1206	NOP53	Q12080	Ribosome biogenesis protein NOP53 OS=Saccharomyces cerevisiae (strain ATCC 204508 / S288c) GN=NOP53 PE=1 SV=1	3	1	1	1	6	3	10	6.65669	4.12329	22.6326	18.5871	2.18094e-11	1.85294e-10	16.5515	0.970495	1	1	Long_CL - Long_NoCL	limma	2.18094e-11	1.85294e-10	TRUE	enriched hit	6.65669	FALSE	TRUE	TRUE
1207	PBP1	P53297	PAB1-binding protein 1 OS=Saccharomyces cerevisiae (strain ATCC 204508 / S288c) GN=PBP1 PE=1 SV=1	3	1	1	1	6	3	6	6.24956	4.23664	21.7214	18.4156	2.47631e-11	2.08745e-10	16.4281	0.970767	1	1	Long_CL - Long_NoCL	limma	2.47631e-11	2.08745e-10	TRUE	enriched hit	6.24956	FALSE	TRUE	TRUE
1208	FSH1	P38777	Family of serine hydrolases 1 OS=Saccharomyces cerevisiae (strain ATCC 204508 / S288c) GN=FSH1 PE=1 SV=1	2	1	1	NA	6	2	3	5.69517	4.67445	20.3605	18.3908	2.52251e-11	2.10991e-10	16.0534	0.970807	1	1	Long_CL - Long_NoCL	limma	2.52251e-11	2.10991e-10	TRUE	enriched hit	5.69517	TRUE	TRUE	FALSE
1209	CDC19	P00549	Pyruvate kinase 1 OS=Saccharomyces cerevisiae (strain ATCC 204508 / S288c) GN=CDC19 PE=1 SV=2	3	1	1	1	6	3	33	8.43609	3.20961	25.9022	18.3521	2.59643e-11	2.15504e-10	16.382	0.970868	1	1	Long_CL - Long_NoCL	limma	2.59643e-11	2.15504e-10	TRUE	enriched hit	8.43609	FALSE	TRUE	TRUE
1210	RPL35A|RPL35B	P0CX84|P0CX85	60S ribosomal protein L35-A OS=Saccharomyces cerevisiae (strain ATCC 204508 / S288c) GN=RPL35A PE=1 SV=1|60S ribosomal protein L35-B OS=Saccharomyces cerevisiae (strain ATCC 204508 / S288c) GN=RPL35B PE=1 SV=1	3	1	1	1	6	3	8	7.65088	6.36689	22.2978	18.2883	2.72323e-11	2.22625e-10	16.3356	0.970969	1	1	Long_CL - Long_NoCL	limma	2.72323e-11	2.22625e-10	TRUE	enriched hit	7.65088	TRUE	TRUE	FALSE
[truncated: 8,501 more rows]
